# Supplementary material for: Recent infection by Wolbachia alters microbial communities in wild Laodelphax striatellus populations
Source: Microbiome. 2020 Jul 2;8:104. doi: 10.1186/s40168-020-00878-x (PMC7333401; doi:10.1186/s40168-020-00878-x)
Supplement: Supplementary file 3 — Additional file 2: Table S5 Abundance of OTUs among the 48 samples. Table S8 Abundance of OTUs between the Wolbachia-infected and Wolbachia-free females in SAP populations. Table S9 Read proportions of bacterial 16S rRNA genes among Wolbachia-infected females and Wolbachia-free females at the genus level by Mann-Whitney U tests. Table S13 Read proportions of bacterial 16S rRNA genes for Wolbachia-infected females (excluding Wolbachia reads) at the genus level by Mann-Whitney U tests. Table S14 Significantly increased read proportions of bacterial 16S rRNA genes and the tissue in which their corresponding bacteria were distributed for Wolbachia-infected females (excluding Wolbachia reads) at the genus level by Mann-Whitney U tests. The tissue distribution of bacteria was obtained from Zhang et al. [33]. Table S15 Significantly reduced read proportions of bacterial 16S rRNA genes and the tissue in which their corresponding bacteria were distributed for Wolbachia-infected females (excluding Wolbachia reads) at the genus level by Mann-Whitney U tests. The tissue distribution of bacteria was obtained from Zhang et al. [33]. Table S16 Expression differences of immune genes between Wolbachia-infected and Wolbachia-cured female adults expressed in abdomens. Table S17 Expression differences of metabolism genes between Wolbachia-infected and Wolbachia-cured female adults expressed in abdomens. [file 40168_2020_878_MOESM2_ESM.xlsx]

## Sheet: Table S5
Table S5 The abundance of OTUs among the 48 samples.
Domain	Kingdom	Phylum	Class	Order	Family	Genus	Species	OTU	HRB_1	HRB_2	HRB_3	YC__1	YC__2	YC__3	HN_1	HN_2	HN_3	DD_1	DD_2	DD_3	DZ_1	DZ_2	DZ_3	YUK_1	YUK_2	YUK_3	GZ_1	GZ_2	GZ_3	ICH_1	ICH_2	ICH_3	LY_1	LY_2	LY_3	MDJ_1	MDJ_2	MDJ_3	JOE_1	JOE_2	JOE_3	NJ_1	NJ_2	NJ_3	KUM_1	KUM_2	KUM_3	OHD_1	OHD_2
d__Bacteria	k__norank	p__Proteobacteria	c__Gammaproteobacteria	o__Enterobacteriales	f__Enterobacteriaceae	g__Escherichia-Shigella	s__bacterium_38_g__Escherichia-Shigella	OTU1	0	0	1	0	0	0	0	0	0	0	0	0	0	1	0	0	0	0	0	0	0	0	0	0	0	0	0	0	0	0	0	0	0	0	0	0	0	0	0	0	0
d__Bacteria	k__norank	p__Actinobacteria	c__Actinobacteria	o__Micrococcales	f__Intrasporangiaceae	g__Lapillicoccus	s__uncultured_bacterium_g__Lapillicoccus	OTU10	2	0	16	0	1	0	0	0	0	0	0	2	0	0	0	0	1	0	1	0	3	3	1	1	1	3	0	0	0	1	0	1	0	1	0	0	0	0	0	0	1
d__Bacteria	k__norank	p__Bacteroidetes	c__Cytophagia	o__Cytophagales	f__Cytophagaceae	g__Dyadobacter	s__uncultured_bacterium_g__Dyadobacter	OTU101	0	0	0	1	1	0	0	0	0	0	0	0	0	0	0	0	0	1	0	0	0	0	0	0	0	0	0	0	0	2	0	0	0	0	0	0	0	0	0	0	0
d__Bacteria	k__norank	p__Bacteroidetes	c__Cytophagia	o__Cytophagales	f__Cytophagaceae	g__norank_f__Cytophagaceae	s__Cytophagaceae_bacterium_SM1	OTU103	0	0	1	0	0	0	0	0	0	0	0	0	0	0	0	0	0	0	0	0	0	0	0	0	0	0	0	0	0	0	0	0	0	0	0	0	0	0	0	0	0
d__Bacteria	k__norank	p__Bacteroidetes	c__Sphingobacteriia	o__Sphingobacteriales	f__Sphingobacteriaceae	g__Sphingobacterium	s__Sphingobacterium_multivorum	OTU104	0	6	0	0	0	0	0	0	0	0	0	0	0	0	0	0	0	0	1	5	16	84	155	62	0	0	0	0	0	0	0	0	0	4	28	10	0	0	0	0	0
d__Bacteria	k__norank	p__Bacteroidetes	c__Flavobacteriia	o__Flavobacteriales	f__Cryomorphaceae	g__Fluviicola	s__unclassified_g__Fluviicola	OTU105	0	0	0	0	0	0	0	0	0	0	0	0	0	0	0	0	0	0	0	0	0	0	0	0	0	0	0	0	0	0	0	0	0	0	2	1	0	0	0	0	0
d__Bacteria	k__norank	p__Proteobacteria	c__Betaproteobacteria	o__Burkholderiales	f__Comamonadaceae	g__Delftia	s__unclassified_g__Delftia	OTU106	0	0	0	1	0	0	0	0	0	0	1	0	0	0	0	0	0	0	0	0	0	10	0	1	0	0	0	0	0	0	0	0	1	11	16	7	0	0	0	0	0
d__Bacteria	k__norank	p__Proteobacteria	c__Alphaproteobacteria	o__Rickettsiales	f__Anaplasmataceae	g__Wolbachia	s__unclassified_g__Wolbachia	OTU107	0	0	0	0	0	0	0	0	0	166	0	0	0	1	0	0	0	0	0	0	0	0	1	3	0	0	0	0	0	0	221	1	1	0	0	0	0	0	0	0	0
d__Bacteria	k__norank	p__Proteobacteria	c__Betaproteobacteria	o__Burkholderiales	f__Burkholderiaceae	g__Burkholderia-Paraburkholderia	s__unclassified_g__Burkholderia-Paraburkholderia	OTU108	1	0	0	0	0	0	0	0	0	0	0	0	0	0	0	0	2	0	0	0	0	10	7	27	0	0	0	0	0	0	0	0	0	0	0	0	0	0	0	0	0
d__Bacteria	k__norank	p__Bacteroidetes	c__Flavobacteriia	o__Flavobacteriales	f__Flavobacteriaceae	g__Flavobacterium	s__unclassified_g__Flavobacterium	OTU109	0	0	0	0	0	0	0	0	0	0	0	0	0	0	0	0	0	0	0	0	0	0	0	0	0	0	0	0	0	0	0	0	0	15	26	34	0	0	0	0	0
d__Bacteria	k__norank	p__Firmicutes	c__Bacilli	o__Bacillales	f__Paenibacillaceae	g__Paenibacillus	s__Paenibacillus_hunanensis	OTU11	1	2	2	0	0	0	0	0	0	0	0	0	0	0	0	0	4	4	0	0	3	0	0	0	0	0	0	0	0	0	0	0	0	0	0	0	0	0	0	0	0
d__Bacteria	k__norank	p__Bacteroidetes	c__Flavobacteriia	o__Flavobacteriales	f__Flavobacteriaceae	g__Flavobacterium	s__unclassified_g__Flavobacterium	OTU110	0	0	0	0	0	0	0	0	0	0	0	0	0	0	0	0	0	0	0	0	0	0	0	0	0	0	0	0	0	0	0	0	0	0	1	0	0	0	0	0	0
d__Bacteria	k__norank	p__Bacteroidetes	c__Sphingobacteriia	o__Sphingobacteriales	f__Sphingobacteriaceae	g__Nubsella	s__unclassified_g__Nubsella	OTU111	0	0	1	0	0	0	0	0	0	0	0	0	0	0	0	0	0	0	0	0	0	0	0	0	0	0	0	0	0	0	0	0	0	7	7	8	0	0	0	0	0
d__Bacteria	k__norank	p__Proteobacteria	c__Gammaproteobacteria	o__Xanthomonadales	f__Solimonadaceae	g__Solimonas	s__unclassified_g__Solimonas	OTU112	0	0	0	0	0	0	0	0	0	0	0	0	0	0	0	0	0	0	0	0	0	0	0	0	0	0	0	0	0	0	0	0	0	0	0	1	0	0	0	0	0
d__Bacteria	k__norank	p__Cyanobacteria	c__Cyanobacteria	o__norank_c__Cyanobacteria	f__norank_c__Cyanobacteria	g__norank_c__Cyanobacteria	s__uncultured_Desulfuromonadaceae_bacterium_g__norank	OTU113	0	0	0	0	0	0	0	0	0	0	0	0	0	0	0	0	0	0	0	0	0	0	0	0	0	0	0	0	0	0	0	0	0	0	0	1	0	0	0	0	0
d__Bacteria	k__norank	p__Bacteroidetes	c__Flavobacteriia	o__Flavobacteriales	f__Flavobacteriaceae	g__Flavobacterium	s__Flavobacterium_phragmitis	OTU114	0	0	0	0	0	0	0	0	0	0	0	0	0	0	0	0	0	0	0	0	0	0	0	0	0	0	0	0	0	0	0	0	0	2	0	2	0	0	0	0	0
d__Bacteria	k__norank	p__Proteobacteria	c__Betaproteobacteria	o__Burkholderiales	f__Comamonadaceae	g__Xenophilus	s__uncultured_bacterium_g__Xenophilus	OTU115	0	0	0	1	0	0	0	0	0	1	0	0	0	0	0	0	0	0	0	0	0	0	0	1	0	0	0	0	0	0	0	0	0	0	10	2	0	0	0	0	0
d__Bacteria	k__norank	p__Proteobacteria	c__Betaproteobacteria	o__Burkholderiales	f__Burkholderiaceae	g__Burkholderia-Paraburkholderia	s__Paraburkholderia_tropica	OTU117	0	0	0	0	0	0	0	0	0	0	0	0	0	0	0	2	67	4	0	0	0	0	0	0	0	0	0	0	0	0	0	0	0	0	0	0	0	0	0	0	0
d__Bacteria	k__norank	p__Proteobacteria	c__Deltaproteobacteria	o__Bdellovibrionales	f__Bdellovibrionaceae	g__Bdellovibrio	s__Bdellovibrio_sp._ETB	OTU118	0	0	4	0	0	0	0	0	0	0	0	0	0	0	0	0	0	0	0	0	0	0	0	0	0	0	0	0	0	0	0	0	0	1	0	3	0	0	0	0	0
d__Bacteria	k__norank	p__Proteobacteria	c__Gammaproteobacteria	o__Xanthomonadales	f__Xanthomonadaceae	g__Dokdonella	s__unclassified_g__Dokdonella	OTU119	0	0	0	0	0	0	0	0	0	0	0	0	0	0	0	0	0	0	0	0	0	0	0	0	0	0	0	0	0	0	0	0	0	0	5	0	0	0	0	0	0
d__Bacteria	k__norank	p__Actinobacteria	c__Actinobacteria	o__Kineosporiales	f__Kineosporiaceae	g__Quadrisphaera	s__Quadrisphaera_granulorum	OTU12	1	7	22	0	0	0	0	0	0	0	0	0	0	0	0	0	0	0	0	1	0	0	0	0	0	0	0	0	0	0	0	0	0	0	0	0	0	0	0	0	0
d__Bacteria	k__norank	p__Bacteroidetes	c__Flavobacteriia	o__Flavobacteriales	f__Flavobacteriaceae	g__Flavobacterium	s__Flavobacterium_ummariense	OTU120	0	0	1	0	0	0	0	0	0	0	0	0	0	0	0	0	0	0	0	0	0	0	0	0	0	0	0	0	0	0	0	0	0	1	2	2	0	0	0	0	0
d__Bacteria	k__norank	p__Proteobacteria	c__Deltaproteobacteria	o__Bdellovibrionales	f__Bdellovibrionaceae	g__Bdellovibrio	s__Bdellovibrio_bacteriovorus	OTU121	0	0	0	0	0	0	0	0	0	0	0	0	0	0	0	0	0	0	0	0	0	0	0	0	0	0	0	0	0	0	0	0	0	5	9	1	0	0	0	0	0
d__Bacteria	k__norank	p__Actinobacteria	c__Actinobacteria	o__Micrococcales	f__Brevibacteriaceae	g__Brevibacterium	s__Brevibacterium_oceani	OTU122	0	0	0	0	0	0	0	0	0	0	0	0	1	0	0	2	36	0	0	0	0	0	0	0	0	0	0	0	0	0	0	0	0	10	25	3	0	0	0	0	0
d__Bacteria	k__norank	p__Proteobacteria	c__Alphaproteobacteria	o__Rhizobiales	f__Hyphomicrobiaceae	g__Devosia	s__unclassified_g__Devosia	OTU123	0	0	0	1	0	0	0	0	0	0	0	0	0	0	0	0	0	0	0	0	0	0	0	0	0	0	0	0	0	0	0	0	0	0	1	1	0	0	0	0	0
d__Bacteria	k__norank	p__Bacteroidetes	c__Cytophagia	o__Cytophagales	f__Cytophagaceae	g__Dyadobacter	s__Dyadobacter_fermentans	OTU125	0	0	0	0	0	0	0	0	0	0	0	0	0	0	0	0	0	0	0	0	1	0	0	0	0	0	0	0	0	0	0	0	0	0	0	1	0	0	0	0	0
d__Bacteria	k__norank	p__Proteobacteria	c__Gammaproteobacteria	o__Xanthomonadales	f__Solimonadaceae	g__Solimonas	s__unclassified_g__Solimonas	OTU126	0	0	0	0	0	0	0	0	0	0	0	0	0	0	0	0	0	0	0	0	0	0	0	0	0	0	0	0	0	0	0	0	0	0	0	1	0	0	0	0	0
d__Bacteria	k__norank	p__Proteobacteria	c__Alphaproteobacteria	o__Caulobacterales	f__Caulobacteraceae	g__Asticcacaulis	s__unclassified_g__Asticcacaulis	OTU127	0	0	0	0	0	0	0	0	0	0	0	0	0	0	0	0	0	0	0	0	0	0	0	0	0	0	0	0	0	0	0	0	0	0	0	1	0	0	0	0	0
d__Bacteria	k__norank	p__Bacteroidetes	c__Sphingobacteriia	o__Sphingobacteriales	f__Sphingobacteriaceae	g__Mucilaginibacter	s__unclassified_g__Mucilaginibacter	OTU128	0	0	0	0	0	0	0	0	0	0	0	0	0	0	0	0	0	0	0	0	0	0	0	2	0	0	0	0	0	0	0	0	0	0	0	0	0	0	0	0	0
d__Bacteria	k__norank	p__Proteobacteria	c__Gammaproteobacteria	o__Xanthomonadales	f__Xanthomonadaceae	g__Dokdonella	s__unclassified_g__Dokdonella	OTU129	0	0	0	0	0	0	0	0	0	0	0	0	0	0	0	0	0	0	0	0	0	0	0	0	0	0	0	0	0	0	0	0	0	1	2	0	0	0	0	0	0
d__Bacteria	k__norank	p__Actinobacteria	c__Actinobacteria	o__Propionibacteriales	f__Nocardioidaceae	g__Nocardioides	s__unclassified_g__Nocardioides	OTU13	0	0	1	0	2	0	0	0	0	0	0	1	0	0	0	0	0	0	0	0	0	0	0	0	0	0	0	0	0	0	0	0	0	0	0	0	0	0	0	0	0
d__Bacteria	k__norank	p__Verrucomicrobia	c__Verrucomicrobiae	o__Verrucomicrobiales	f__Verrucomicrobiaceae	g__Prosthecobacter	s__uncultured_bacterium_g__Prosthecobacter	OTU131	0	0	0	0	0	0	0	0	0	0	0	0	0	0	0	0	0	0	0	0	0	0	0	0	0	0	0	0	0	0	0	0	0	0	0	0	0	0	0	0	0
d__Bacteria	k__norank	p__Bacteroidetes	c__Sphingobacteriia	o__Sphingobacteriales	f__Sphingobacteriaceae	g__Pedobacter	s__unclassified_g__Pedobacter	OTU132	1	1	5	0	0	0	0	0	0	0	0	0	0	0	0	0	0	0	1	0	0	2	0	20	0	1	0	0	0	0	0	0	0	0	0	0	0	0	0	0	0
d__Bacteria	k__norank	p__Bacteroidetes	c__Sphingobacteriia	o__Sphingobacteriales	f__env.OPS_17	g__norank_f__env.OPS_17	s__uncultured_bacterium_g__norank_f__env.OPS_17	OTU133	0	0	0	0	0	0	0	0	0	0	0	0	0	0	0	0	0	0	0	0	0	0	0	0	0	1	0	0	0	0	0	0	0	0	0	0	0	0	0	0	0
d__Bacteria	k__norank	p__Verrucomicrobia	c__Verrucomicrobiae	o__Verrucomicrobiales	f__Verrucomicrobiaceae	g__Verrucomicrobium	s__uncultured_bacterium_g__Verrucomicrobium	OTU134	0	0	0	0	0	0	0	0	0	0	0	0	0	0	0	0	0	0	0	0	0	0	0	0	0	0	0	0	0	0	0	0	0	1	2	0	0	0	0	0	0
d__Bacteria	k__norank	p__Cyanobacteria	c__Cyanobacteria	o__SubsectionIV	f__FamilyI_o__SubsectionIV	g__norank_f__FamilyI_o__SubsectionIV	s__Dolichospermum_flos-aquae_g__norank	OTU135	0	0	0	0	1	0	0	0	0	0	0	0	0	0	0	0	2	0	0	0	0	1	0	0	0	0	0	0	0	0	0	0	0	0	0	0	0	0	0	0	0
d__Bacteria	k__norank	p__Bacteroidetes	c__Flavobacteriia	o__Flavobacteriales	f__Flavobacteriaceae	g__Capnocytophaga	s__uncultured_bacterium_g__Capnocytophaga	OTU136	0	0	0	0	0	0	0	0	0	0	0	0	0	0	0	0	0	0	0	0	0	2	0	0	0	0	0	0	0	0	0	0	0	0	0	0	0	0	0	0	0
d__Bacteria	k__norank	p__Proteobacteria	c__Gammaproteobacteria	o__Pasteurellales	f__Pasteurellaceae	g__Haemophilus	s__Haemophilus_parainfluenzae_T3T1	OTU138	0	0	0	0	0	0	0	0	0	0	0	0	0	0	0	0	1	0	0	0	0	3	0	0	0	0	0	0	0	0	0	0	0	0	0	0	0	0	0	2	1
d__Bacteria	k__norank	p__Proteobacteria	c__Betaproteobacteria	o__Burkholderiales	f__Comamonadaceae	g__Aquabacterium	s__unclassified_g__Aquabacterium	OTU139	1	2	0	0	0	0	0	0	1	0	0	0	0	0	0	0	0	0	0	0	0	1	0	0	0	1	1	0	0	0	0	0	0	0	0	0	0	0	0	0	1
d__Bacteria	k__norank	p__Actinobacteria	c__Actinobacteria	o__Frankiales	f__Nakamurellaceae	g__Nakamurella	s__uncultured_organism_g__Nakamurella	OTU14	0	4	14	0	0	0	0	0	0	0	0	0	0	0	0	0	0	0	0	0	0	0	0	0	0	0	0	0	0	0	0	0	0	0	0	0	0	0	0	0	0
d__Bacteria	k__norank	p__Actinobacteria	c__Actinobacteria	o__Corynebacteriales	f__Corynebacteriaceae	g__Corynebacterium_1	s__Corynebacterium_jeikeium_K411	OTU140	0	0	0	0	0	0	0	0	0	0	0	0	0	0	1	0	0	0	0	0	0	7	2	0	0	0	0	0	0	0	0	3	0	3	1	1	0	0	0	21	4
d__Bacteria	k__norank	p__Firmicutes	c__Bacilli	o__Lactobacillales	f__Aerococcaceae	g__Eremococcus	s__uncultured_bacterium_g__Eremococcus	OTU141	0	0	0	0	0	0	0	0	0	0	0	0	0	0	0	0	0	0	0	0	0	2	0	1	0	0	0	0	0	0	0	0	0	0	0	0	0	0	0	0	0
d__Bacteria	k__norank	p__Proteobacteria	c__Gammaproteobacteria	o__Xanthomonadales	f__Nevskiaceae	g__Nevskia	s__uncultured_bacterium_g__Nevskia	OTU142	0	0	0	0	0	0	0	1	2	0	0	0	0	0	1	0	0	0	0	0	0	3	2	0	0	0	0	0	0	0	0	0	0	0	0	0	0	0	0	0	0
d__Bacteria	k__norank	p__Saccharibacteria	c__norank_p__Saccharibacteria	o__norank_p__Saccharibacteria	f__norank_p__Saccharibacteria	g__norank_p__Saccharibacteria	s__unclassified_g__norank_p__Saccharibacteria	OTU143	0	0	0	1	0	0	0	0	0	0	0	0	0	0	0	1	1	0	0	0	0	8	17	13	0	0	0	0	0	0	0	0	0	2	4	1	0	0	0	0	0
d__Bacteria	k__norank	p__Actinobacteria	c__Actinobacteria	o__Actinomycetales	f__Actinomycetaceae	g__Actinomyces	s__Actinomyces_viscosus	OTU144	0	0	0	0	0	0	0	0	0	0	0	0	0	0	0	0	0	0	0	0	0	5	2	1	0	0	0	0	0	0	0	0	1	0	0	0	0	1	0	0	1
d__Bacteria	k__norank	p__Proteobacteria	c__Alphaproteobacteria	o__Rhodobacterales	f__Rhodobacteraceae	g__Rhodobacter	s__unclassified_g__Rhodobacter	OTU145	0	0	0	0	0	0	0	0	0	0	0	0	0	0	0	0	0	0	0	0	0	0	0	0	0	0	0	0	0	0	0	0	0	0	0	0	0	0	0	0	0
d__Bacteria	k__norank	p__Actinobacteria	c__Actinobacteria	o__Corynebacteriales	f__Corynebacteriaceae	g__Corynebacterium_1	s__Corynebacterium_imitans	OTU146	0	0	0	0	2	0	0	0	0	0	1	0	0	0	1	0	1	1	0	0	0	7	3	0	0	0	0	0	0	0	0	2	0	0	0	0	0	0	0	20	9
d__Bacteria	k__norank	p__TM6__Dependentiae_	c__norank_p__TM6__Dependentiae_	o__norank_p__TM6__Dependentiae_	f__norank_p__TM6__Dependentiae_	g__norank_p__TM6__Dependentiae_	s__uncultured_bacterium_g__norank_p__TM6__Dependentiae_	OTU147	0	0	0	0	0	0	0	0	0	0	0	0	0	0	0	0	0	1	0	0	0	3	0	0	0	0	0	0	0	0	0	0	0	0	0	0	0	0	0	0	0
d__Bacteria	k__norank	p__Saccharibacteria	c__norank_p__Saccharibacteria	o__norank_p__Saccharibacteria	f__norank_p__Saccharibacteria	g__norank_p__Saccharibacteria	s__uncultured_cyanobacterium_g__norank_p__Saccharibacteria	OTU148	0	0	0	1	0	0	0	0	0	0	0	0	0	0	0	0	1	0	0	0	0	43	405	130	0	0	0	0	0	0	0	0	0	2	6	0	0	0	0	0	0
d__Bacteria	k__norank	p__Proteobacteria	c__Betaproteobacteria	o__Burkholderiales	f__Comamonadaceae	g__Acidovorax	s__Acidovorax_avenae_subsp._avenae_g__Acidovorax	OTU149	0	1	16	0	0	0	0	1	1	0	0	0	0	0	0	23	83	31	0	1	0	106	22	165	0	0	0	0	0	0	0	0	0	0	0	7	0	0	0	0	13
d__Bacteria	k__norank	p__Bacteroidetes	c__Cytophagia	o__Cytophagales	f__Cytophagaceae	g__Hymenobacter	s__uncultured_bacterium_g__Hymenobacter	OTU15	0	0	22	1	1	1	0	0	0	0	0	0	0	0	0	0	0	0	0	0	0	0	0	0	0	1	0	0	1	0	0	0	1	0	0	0	0	0	0	0	0
d__Bacteria	k__norank	p__Firmicutes	c__Bacilli	o__Lactobacillales	f__Leuconostocaceae	g__Leuconostoc	s__Leuconostoc_pseudomesenteroides	OTU150	0	0	0	0	0	0	0	0	0	0	0	0	0	0	0	3	0	0	0	0	0	0	15	0	0	0	0	0	0	0	0	0	0	0	0	0	0	0	0	0	0
d__Bacteria	k__norank	p__Proteobacteria	c__Gammaproteobacteria	o__Pseudomonadales	f__Pseudomonadaceae	g__Pseudomonas	s__unclassified_g__Pseudomonas	OTU151	0	0	1	0	0	0	1	0	1	0	0	0	0	1	1	1	6	0	1	0	4	36	13	10	52	242	344	36	3	0	0	0	1	2	0	1	0	0	0	0	0
d__Bacteria	k__norank	p__Proteobacteria	c__Gammaproteobacteria	o__Xanthomonadales	f__Xanthomonadaceae	g__Xanthomonas	s__Xanthomonas_albilineans	OTU152	0	1	11	0	0	0	0	0	0	0	0	0	0	0	0	8	27	15	0	1	10	6	38	4	0	0	0	6	0	0	0	0	0	0	0	0	0	0	0	0	0
d__Bacteria	k__norank	p__Proteobacteria	c__Gammaproteobacteria	o__Xanthomonadales	f__Xanthomonadaceae	g__Lysobacter	s__Lysobacter_brunescens	OTU153	1	0	0	0	0	0	0	0	0	0	0	0	0	0	0	0	0	0	0	0	0	0	0	1	0	0	0	0	0	0	0	1	0	0	0	1	0	0	0	0	1
d__Bacteria	k__norank	p__Proteobacteria	c__Gammaproteobacteria	o__Enterobacteriales	f__Enterobacteriaceae	g__unclassified_f__Enterobacteriaceae	s__unclassified_f__Enterobacteriaceae	OTU154	1	0	12	0	1	75	6	1	5	0	0	1	0	3	0	15	2	50	0	1	3	5	161	12	4	6	22	42	105	3	0	166	0	1	3	2	0	0	12	0	15
d__Bacteria	k__norank	p__Proteobacteria	c__Alphaproteobacteria	o__Sphingomonadales	f__Sphingomonadaceae	g__Novosphingobium	s__Novosphingobium_rosa	OTU155	0	0	0	0	0	0	0	0	0	0	0	0	0	0	0	3	11	3	0	0	0	9	15	97	0	0	0	0	0	0	0	0	0	0	0	1	0	0	0	0	0
d__Bacteria	k__norank	p__Bacteroidetes	c__Flavobacteriia	o__Flavobacteriales	f__Flavobacteriaceae	g__Chryseobacterium	s__unclassified_g__Chryseobacterium	OTU156	2	0	0	0	0	0	0	1	1	0	0	0	0	0	0	0	0	0	0	0	0	20	46	234	0	0	0	0	0	0	0	0	0	3	5	3	0	0	0	0	0
d__Bacteria	k__norank	p__Proteobacteria	c__Betaproteobacteria	o__Burkholderiales	f__Burkholderiaceae	g__Pandoraea	s__Pandoraea_pnomenusa	OTU157	0	0	0	0	0	0	0	0	0	0	0	0	0	0	0	1	13	1	0	0	0	49	3	27	0	0	0	0	0	0	0	0	0	0	0	0	0	0	0	0	0
d__Bacteria	k__norank	p__Proteobacteria	c__Alphaproteobacteria	o__Rhizobiales	f__Rhizobiaceae	g__Rhizobium	s__unclassified_g__Rhizobium	OTU158	0	0	0	0	0	0	0	0	0	0	0	0	0	0	1	6	29	6	0	0	0	224	59	183	0	0	0	0	0	0	0	0	0	1	1	0	0	0	0	0	0
d__Bacteria	k__norank	p__Proteobacteria	c__Betaproteobacteria	o__Burkholderiales	f__Burkholderiaceae	g__Burkholderia-Paraburkholderia	s__Paraburkholderia_caledonica	OTU159	0	0	0	0	0	0	0	0	0	0	0	0	0	0	0	0	73	17	0	0	0	6	6	89	0	0	0	0	0	0	0	0	0	0	0	0	0	0	0	0	0
d__Bacteria	k__norank	p__Deinococcus-Thermus	c__Deinococci	o__Deinococcales	f__Deinococcaceae	g__Deinococcus	s__Deinococcus_gobiensis_I-0	OTU16	2	16	35	1	0	0	0	0	0	1	7	0	0	0	0	0	0	0	0	1	0	0	0	0	1	1	3	0	0	0	0	0	2	0	0	0	0	0	0	0	0
d__Bacteria	k__norank	p__Proteobacteria	c__Alphaproteobacteria	o__Sphingomonadales	f__Sphingomonadaceae	g__Novosphingobium	s__Novosphingobium_capsulatum_g__Novosphingobium	OTU160	0	0	0	0	0	0	1	0	0	0	0	0	0	0	0	3	58	6	0	0	0	10	3	23	0	0	0	0	0	0	0	0	0	0	2	0	0	0	0	0	0
d__Bacteria	k__norank	p__Proteobacteria	c__Alphaproteobacteria	o__Rhizobiales	f__Methylobacteriaceae	g__Methylobacterium	s__Methylobacterium_adhaesivum_g__Methylobacterium	OTU161	1	3	22	0	0	0	0	0	0	0	2	0	2	0	0	0	0	0	0	0	0	1	0	6	0	1	1	0	0	0	0	0	0	0	0	0	0	0	0	1	0
d__Bacteria	k__norank	p__Bacteroidetes	c__Sphingobacteriia	o__Sphingobacteriales	f__Sphingobacteriaceae	g__Mucilaginibacter	s__Mucilaginibacter_kameinonensis	OTU162	0	0	0	0	0	0	0	0	0	0	0	0	0	0	0	0	0	0	0	0	0	3	0	6	0	0	0	0	0	0	0	0	0	0	0	0	0	0	0	0	0
d__Bacteria	k__norank	p__Cyanobacteria	c__Cyanobacteria	o__norank_c__Cyanobacteria	f__norank_c__Cyanobacteria	g__norank_c__Cyanobacteria	s__Auxenochlorella_protothecoides_g__norank	OTU163	0	0	0	1	0	0	0	0	0	0	1	0	0	0	0	0	0	0	0	0	0	0	0	2	0	0	0	0	0	0	1	0	0	0	2	0	0	0	0	0	0
d__Bacteria	k__norank	p__Proteobacteria	c__Alphaproteobacteria	o__Caulobacterales	f__Caulobacteraceae	g__Phenylobacterium	s__unclassified_g__Phenylobacterium	OTU164	0	0	0	0	0	0	0	0	0	0	0	0	0	0	0	0	0	0	0	0	1	1	0	0	0	0	0	0	0	0	0	0	0	0	0	0	0	0	0	0	0
d__Bacteria	k__norank	p__Proteobacteria	c__unclassified_p__Proteobacteria	o__unclassified_p__Proteobacteria	f__unclassified_p__Proteobacteria	g__unclassified_p__Proteobacteria	s__unclassified_p__Proteobacteria	OTU165	0	0	0	0	0	0	0	0	0	0	0	0	0	0	0	0	0	0	0	0	0	0	0	3	0	0	0	0	0	0	0	0	0	0	0	0	0	0	0	0	0
d__Bacteria	k__norank	p__Actinobacteria	c__Actinobacteria	o__Propionibacteriales	f__Nocardioidaceae	g__Nocardioides	s__unclassified_g__Nocardioides	OTU166	2	0	2	0	0	0	0	0	0	0	0	0	0	0	0	0	0	0	0	0	0	0	0	1	0	0	0	0	0	0	0	0	0	0	0	0	0	0	0	0	0
d__Bacteria	k__norank	p__Proteobacteria	c__Alphaproteobacteria	o__Sphingomonadales	f__Sphingomonadaceae	g__Novosphingobium	s__unclassified_g__Novosphingobium	OTU167	1	1	0	1	0	0	0	0	0	0	0	0	0	0	0	1	0	1	0	0	0	15	87	68	0	0	0	0	0	1	0	0	0	0	1	0	0	0	0	0	0
d__Bacteria	k__norank	p__Proteobacteria	c__Alphaproteobacteria	o__Rhizobiales	f__Rhizobiaceae	g__Rhizobium	s__Rhizobium_larrymoorei	OTU168	3	10	56	2	0	0	0	0	2	0	4	0	0	0	0	3	11	1	2	5	7	1140	231	620	0	0	0	0	1	3	0	0	0	7	9	14	0	0	0	0	0
d__Bacteria	k__norank	p__Saccharibacteria	c__norank_p__Saccharibacteria	o__norank_p__Saccharibacteria	f__norank_p__Saccharibacteria	g__norank_p__Saccharibacteria	s__unclassified_g__norank_p__Saccharibacteria	OTU169	0	0	1	0	0	0	0	0	0	0	0	0	0	0	0	0	0	0	0	0	0	0	0	4	0	0	1	0	0	0	0	0	0	0	0	2	0	0	0	0	0
d__Bacteria	k__norank	p__Proteobacteria	c__Alphaproteobacteria	o__Sphingomonadales	f__Sphingomonadaceae	g__Sphingomonas	s__Sphingomonas_aerolata	OTU17	0	0	2	4	4	0	0	0	0	0	0	0	0	0	0	0	0	0	0	0	0	0	0	0	0	0	0	4	0	39	0	0	0	0	0	0	0	0	0	0	1
d__Bacteria	k__norank	p__Bacteroidetes	c__Flavobacteriia	o__Flavobacteriales	f__Flavobacteriaceae	g__Elizabethkingia	s__Elizabethkingia_meningoseptica	OTU170	0	0	0	0	0	0	0	0	0	0	0	0	0	0	0	0	0	0	0	0	0	0	0	0	26	126	199	0	0	0	0	0	0	1	1	0	0	0	0	0	1
d__Bacteria	k__norank	p__Actinobacteria	c__Actinobacteria	o__Frankiales	f__Frankiaceae	g__Jatrophihabitans	s__uncultured_Frankineae_bacterium_g__Jatrophihabitans	OTU172	0	0	1	0	0	0	0	0	0	0	0	0	0	0	0	0	5	0	0	0	0	10	0	0	1	5	1	0	0	0	0	0	0	0	0	0	0	0	0	0	0
d__Bacteria	k__norank	p__Cyanobacteria	c__Cyanobacteria	o__norank_c__Cyanobacteria	f__norank_c__Cyanobacteria	g__norank_c__Cyanobacteria	s__Nannochloropsis_oceanica_g__norank	OTU173	0	0	0	0	0	0	0	1	0	0	0	0	0	0	0	0	0	0	0	0	0	0	0	0	0	1	0	0	0	0	0	0	0	0	0	0	0	0	0	0	0
d__Bacteria	k__norank	p__Proteobacteria	c__Alphaproteobacteria	o__Sphingomonadales	f__Sphingomonadaceae	g__Sphingomonas	s__unclassified_g__Sphingomonas	OTU174	0	0	1	1	0	0	0	0	0	0	0	0	0	0	0	0	0	0	0	0	0	0	0	0	0	2	6	0	2	0	0	0	0	0	0	0	0	0	0	0	0
d__Bacteria	k__norank	p__Proteobacteria	c__Gammaproteobacteria	o__Pseudomonadales	f__Pseudomonadaceae	g__Pseudomonas	s__unclassified_g__Pseudomonas	OTU175	0	0	2	2	0	0	3	0	2	2	0	0	1	2	1	1	1	1	0	1	3	2	2	10	207	1101	1257	4	0	0	0	1	0	0	6	4	0	0	0	3	0
d__Bacteria	k__norank	p__Proteobacteria	c__Gammaproteobacteria	o__Enterobacteriales	f__Enterobacteriaceae	g__Pantoea	s__unclassified_g__Pantoea	OTU176	12	5	197	0	8	0	1	1	2	0	3	0	0	0	0	925	17	213	8	12	57	4	211	568	1	1	2	1914	7953	109	0	4	0	12	14	4	3	1	898	10	2091
d__Bacteria	k__norank	p__Actinobacteria	c__Actinobacteria	o__Frankiales	f__Geodermatophilaceae	g__Blastococcus	s__uncultured_Blastococcus_sp._g__Blastococcus	OTU177	0	0	0	0	1	0	0	0	1	0	0	0	0	0	0	1	0	0	0	0	0	1	0	0	0	0	0	1	3	1	0	0	0	0	0	0	0	0	0	0	0
d__Bacteria	k__norank	p__Actinobacteria	c__Actinobacteria	o__Pseudonocardiales	f__Pseudonocardiaceae	g__Pseudonocardia	s__uncultured_bacterium_g__Pseudonocardia	OTU178	0	0	0	0	0	0	0	0	0	0	0	0	0	0	0	0	0	0	0	0	0	0	0	0	1	1	1	0	0	1	0	0	0	0	0	0	0	0	0	0	0
d__Bacteria	k__norank	p__Firmicutes	c__Bacilli	o__Lactobacillales	f__Enterococcaceae	g__Enterococcus	s__unclassified_g__Enterococcus	OTU179	0	1	1	0	1	0	0	0	1	11	19	1	0	85	0	0	0	0	0	0	0	0	0	0	0	0	0	1	15	1177	0	0	0	0	1	0	0	1	0	0	0
d__Bacteria	k__norank	p__Proteobacteria	c__Betaproteobacteria	o__Burkholderiales	f__Oxalobacteraceae	g__Massilia	s__unclassified_g__Massilia	OTU18	0	1	14	7	1	0	0	0	0	0	0	0	0	0	0	0	0	0	0	0	0	0	0	1	0	0	0	2	0	0	0	0	0	0	0	0	0	0	0	0	0
d__Bacteria	k__norank	p__Proteobacteria	c__Gammaproteobacteria	o__Pseudomonadales	f__Pseudomonadaceae	g__Pseudomonas	s__unclassified_g__Pseudomonas	OTU180	0	0	0	2	0	0	0	0	1	0	0	0	0	0	0	0	0	0	0	0	0	0	0	0	1	10	7	48	2	121	0	0	0	0	0	0	0	0	0	0	0
d__Bacteria	k__norank	p__Bacteroidetes	c__Sphingobacteriia	o__Sphingobacteriales	f__Sphingobacteriaceae	g__Pedobacter	s__Pedobacter_duraquae	OTU181	0	0	0	0	0	0	0	0	0	0	0	0	0	0	0	0	0	0	0	0	0	0	0	0	0	0	0	0	1	17	0	0	0	0	0	0	0	0	0	0	0
d__Bacteria	k__norank	p__Proteobacteria	c__Betaproteobacteria	o__Burkholderiales	f__Oxalobacteraceae	g__Massilia	s__unclassified_g__Massilia	OTU182	0	1	5	10	5	1	0	0	0	0	0	0	0	0	0	0	0	0	0	0	0	2	0	0	0	0	1	338	0	275	0	1	0	0	0	0	0	0	0	0	0
d__Bacteria	k__norank	p__Actinobacteria	c__Actinobacteria	o__Micrococcales	f__Microbacteriaceae	g__unclassified_f__Microbacteriaceae	s__unclassified_f__Microbacteriaceae	OTU183	0	1	14	7	3	1	0	0	0	0	0	0	0	0	0	1	0	0	0	0	0	1	0	0	0	0	0	3	1	87	0	0	0	0	0	0	0	0	0	1	0
d__Bacteria	k__norank	p__Actinobacteria	c__Actinobacteria	o__Micrococcales	f__Microbacteriaceae	g__Microbacterium	s__unclassified_g__Microbacterium	OTU184	2	2	14	0	0	1	0	10	1	0	2	1	0	0	0	219	1233	678	1	0	2	113	49	183	0	1	1	0	0	1	18	0	0	1	8	1	0	0	0	2	0
d__Bacteria	k__norank	p__Proteobacteria	c__Gammaproteobacteria	o__Pseudomonadales	f__Moraxellaceae	g__Acinetobacter	s__Acinetobacter_junii_NIPH_182	OTU185	1	0	2	5	2	0	0	0	0	0	1	0	0	1	0	3	36	6	0	0	0	24	45	108	0	0	1	0	0	0	4	94	23	0	0	0	1	0	0	7	26
d__Bacteria	k__norank	p__Actinobacteria	c__Actinobacteria	o__Rubrobacterales	f__Rubrobacteriaceae	g__Rubrobacter	s__unclassified_g__Rubrobacter	OTU186	1	0	0	1	2	0	0	0	0	0	0	0	0	0	0	0	0	0	0	0	0	0	1	3	0	0	0	0	0	0	0	2	0	0	0	0	2	1	0	1	0
d__Bacteria	k__norank	p__unclassified_k__norank	c__unclassified_k__norank	o__unclassified_k__norank	f__unclassified_k__norank	g__unclassified_k__norank	s__unclassified_k__norank	OTU187	0	0	1	0	0	0	4	0	6	0	1	5	0	1	2	0	0	0	0	0	0	0	0	0	1	0	0	1	2	1	0	4	4	8	4	0	0	0	0	0	0
d__Bacteria	k__norank	p__Proteobacteria	c__Deltaproteobacteria	o__Myxococcales	f__Polyangiaceae	g__Sorangium	s__unclassified_g__Sorangium	OTU188	0	0	0	0	0	0	0	0	0	0	0	0	0	0	0	0	0	0	0	0	0	0	0	0	0	0	0	0	0	0	0	0	0	1	0	0	0	0	0	0	0
d__Bacteria	k__norank	p__Saccharibacteria	c__norank_p__Saccharibacteria	o__norank_p__Saccharibacteria	f__norank_p__Saccharibacteria	g__norank_p__Saccharibacteria	s__unclassified_g__norank_p__Saccharibacteria	OTU189	0	0	0	0	0	0	0	0	0	0	0	0	0	0	0	0	0	0	0	0	0	0	0	0	0	0	0	0	0	0	0	0	0	3	4	2	0	0	0	0	0
d__Bacteria	k__norank	p__Proteobacteria	c__Alphaproteobacteria	o__Rickettsiales	f__Mitochondria	g__norank_f__Mitochondria	s__unclassified_g__norank_f__Mitochondria	OTU19	1	0	0	2	0	0	0	0	0	0	0	0	2	0	0	0	0	1	0	0	0	0	0	0	0	0	0	0	2	0	0	1	0	0	0	0	0	1	0	5	1
d__Bacteria	k__norank	p__Proteobacteria	c__Alphaproteobacteria	o__Rhodospirillales	f__Acetobacteraceae	g__Zavarzinia	s__unclassified_g__Zavarzinia	OTU190	0	0	0	0	0	0	0	0	0	0	0	0	0	0	0	0	0	0	0	0	0	0	0	0	0	0	0	0	0	0	0	0	0	0	1	1	0	0	0	0	0
d__Bacteria	k__norank	p__Proteobacteria	c__Gammaproteobacteria	o__Xanthomonadales	f__Xanthomonadaceae	g__Luteimonas	s__unclassified_g__Luteimonas	OTU191	0	0	0	0	0	0	0	0	0	0	0	0	0	0	0	0	0	0	0	0	0	0	0	0	0	0	0	0	0	0	0	0	0	1	4	0	0	0	0	0	0
d__Bacteria	k__norank	p__Proteobacteria	c__Alphaproteobacteria	o__Rhizobiales	f__Brucellaceae	g__Ochrobactrum	s__Ochrobactrum_pseudogrignonense_g__Ochrobactrum	OTU192	2	1	3	0	0	0	0	0	0	0	0	0	1	0	0	0	0	1	0	0	1	3	0	1	0	0	0	0	0	0	0	0	0	2	15	7	0	0	0	0	0
d__Bacteria	k__norank	p__Firmicutes	c__Clostridia	o__Halanaerobiales	f__ODP1230B8.23	g__norank_f__ODP1230B8.23	s__uncultured_Thermanaeromonas_sp._g__norank	OTU193	0	0	0	0	0	0	0	0	0	0	0	0	0	0	0	0	0	0	0	0	0	0	0	0	0	0	0	0	0	0	0	0	0	0	2	1	0	0	0	0	0
d__Bacteria	k__norank	p__Bacteroidetes	c__Sphingobacteriia	o__Sphingobacteriales	f__Sphingobacteriaceae	g__Sphingobacterium	s__Sphingobacterium_spiritivorum	OTU194	0	0	0	0	0	0	0	0	0	0	0	0	0	0	0	0	0	0	0	0	0	0	0	0	0	0	0	0	0	0	0	0	0	2	5	3	0	0	0	0	0
d__Bacteria	k__norank	p__Proteobacteria	c__Alphaproteobacteria	o__Rhizobiales	f__Aurantimonadaceae	g__Aureimonas	s__unclassified_g__Aureimonas	OTU195	0	0	8	0	0	0	0	0	0	0	1	0	0	0	0	0	1	0	0	0	1	1	0	0	0	0	0	0	0	0	0	0	0	2	1	1	0	0	0	0	7
d__Bacteria	k__norank	p__Actinobacteria	c__Actinobacteria	o__Streptomycetales	f__Streptomycetaceae	g__Streptomyces	s__unclassified_g__Streptomyces	OTU196	0	0	0	1	0	0	0	0	0	0	0	1	0	1	1	0	0	0	0	0	0	0	0	0	0	0	2	0	0	0	0	0	0	0	21	4	0	0	0	0	0
d__Bacteria	k__norank	p__Proteobacteria	c__Alphaproteobacteria	o__Rhizobiales	f__Hyphomicrobiaceae	g__Devosia	s__unclassified_g__Devosia	OTU197	0	0	0	0	0	0	0	0	0	0	0	0	0	0	0	0	0	0	1	0	0	0	0	0	0	0	0	0	0	0	0	0	0	0	6	2	0	0	0	0	0
d__Bacteria	k__norank	p__Proteobacteria	c__Deltaproteobacteria	o__Myxococcales	f__Myxococcaceae	g__Myxococcus	s__unclassified_g__Myxococcus	OTU198	0	0	0	0	0	0	0	0	0	0	0	0	0	0	0	0	0	0	0	0	0	0	0	0	0	0	0	0	0	0	0	0	0	0	2	3	0	0	0	0	0
d__Bacteria	k__norank	p__Saccharibacteria	c__norank_p__Saccharibacteria	o__norank_p__Saccharibacteria	f__norank_p__Saccharibacteria	g__norank_p__Saccharibacteria	s__uncultured_bacterium_g__norank_p__Saccharibacteria	OTU199	0	0	0	0	0	0	0	0	0	0	0	0	0	0	0	0	0	0	0	0	0	0	0	0	0	0	0	0	0	0	0	0	0	3	5	0	0	0	0	0	0
d__Bacteria	k__norank	p__Bacteroidetes	c__Sphingobacteriia	o__Sphingobacteriales	f__Chitinophagaceae	g__norank_f__Chitinophagaceae	s__uncultured_bacterium_g__norank_f__Chitinophagaceae	OTU2	2	0	0	0	0	0	0	0	0	0	0	0	0	0	0	0	0	0	0	0	0	0	0	0	0	0	0	0	0	0	0	0	0	0	0	0	0	0	0	0	0
d__Bacteria	k__norank	p__Bacteroidetes	c__Flavobacteriia	o__Flavobacteriales	f__Flavobacteriaceae	g__Cloacibacterium	s__uncultured_bacterium_g__Cloacibacterium	OTU20	0	0	0	1	0	0	0	0	0	0	0	0	0	0	0	1	1	0	0	0	0	2	1	0	0	0	0	0	0	0	0	0	0	0	0	0	0	0	0	0	0
d__Bacteria	k__norank	p__Bacteroidetes	c__Flavobacteriia	o__Flavobacteriales	f__Flavobacteriaceae	g__Flavobacterium	s__Flavobacterium_ceti	OTU200	0	0	0	0	0	0	0	0	0	0	0	0	0	0	0	0	0	0	0	0	0	0	0	0	0	0	0	0	0	0	0	0	0	0	0	12	0	0	0	0	0
d__Bacteria	k__norank	p__Saccharibacteria	c__norank_p__Saccharibacteria	o__norank_p__Saccharibacteria	f__norank_p__Saccharibacteria	g__norank_p__Saccharibacteria	s__marine_metagenome_g__norank_p__Saccharibacteria	OTU201	0	0	0	0	0	0	0	0	0	0	0	0	0	0	0	0	0	0	0	0	0	0	2	0	0	0	0	0	0	0	0	0	0	2	1	1	0	0	0	0	0
d__Bacteria	k__norank	p__Bacteroidetes	c__Cytophagia	o__Cytophagales	f__Cytophagaceae	g__Runella	s__unclassified_g__Runella	OTU202	0	0	0	0	0	0	0	0	0	0	0	0	0	0	0	0	0	0	0	0	0	0	0	0	0	0	0	0	0	0	0	0	0	0	0	9	0	0	0	0	0
d__Bacteria	k__norank	p__Proteobacteria	c__Alphaproteobacteria	o__Caulobacterales	f__Caulobacteraceae	g__Brevundimonas	s__Brevundimonas_diminuta	OTU203	1	0	0	0	0	0	0	0	0	0	0	0	0	0	0	0	0	0	0	0	0	0	0	0	0	0	0	0	0	0	0	0	0	0	5	5	0	0	0	0	1
d__Bacteria	k__norank	p__Actinobacteria	c__Actinobacteria	o__Pseudonocardiales	f__Pseudonocardiaceae	g__Pseudonocardia	s__Pseudonocardia_carboxydivorans	OTU204	0	0	0	0	0	0	0	0	0	0	0	0	0	0	0	0	0	0	0	0	0	0	0	1	0	0	0	0	0	0	0	0	0	11	18	31	0	1	0	0	1
d__Bacteria	k__norank	p__Proteobacteria	c__Alphaproteobacteria	o__Rhodospirillales	f__Acetobacteraceae	g__Zavarzinia	s__unclassified_g__Zavarzinia	OTU205	0	0	0	0	0	0	0	0	0	0	0	0	0	0	0	0	0	0	0	0	0	0	0	0	0	0	0	0	0	0	0	0	0	0	0	2	0	0	0	0	0
d__Bacteria	k__norank	p__Bacteroidetes	c__Cytophagia	o__Cytophagales	f__Cytophagaceae	g__Emticicia	s__unclassified_g__Emticicia	OTU206	0	0	0	0	0	0	0	0	0	0	0	0	0	0	0	0	0	0	0	0	0	0	0	0	0	0	0	0	0	0	0	0	0	4	1	1	0	0	0	0	0
d__Bacteria	k__norank	p__Proteobacteria	c__Gammaproteobacteria	o__Enterobacteriales	f__Enterobacteriaceae	g__Pantoea	s__unclassified_g__Pantoea	OTU208	1	0	12	0	0	0	0	0	0	0	3	0	0	0	0	133	18	290	4	6	37	4	40	35	0	1	1	3	8	0	0	3	0	0	0	1	0	1	36	0	68
d__Bacteria	k__norank	p__Proteobacteria	c__Gammaproteobacteria	o__Enterobacteriales	f__Enterobacteriaceae	g__unclassified_f__Enterobacteriaceae	s__unclassified_f__Enterobacteriaceae	OTU209	4	1	20	0	1	1	1	0	0	0	0	0	0	0	0	39	0	31	3	1	13	0	10	22	0	0	0	67	240	4	0	0	0	3	1	1	0	0	38	0	43
d__Bacteria	k__norank	p__Cyanobacteria	c__Cyanobacteria	o__norank_c__Cyanobacteria	f__norank_c__Cyanobacteria	g__norank_c__Cyanobacteria	s__Phaseolus_acutifolius__tepary_bean__g__norank	OTU21	0	0	1	3	0	0	0	0	0	0	1	1	0	0	0	0	0	0	0	0	0	1	0	0	0	0	1	1	0	0	0	0	0	0	0	0	0	1	0	1	0
d__Bacteria	k__norank	p__Proteobacteria	c__Gammaproteobacteria	o__Enterobacteriales	f__Enterobacteriaceae	g__Arsenophonus	s__unclassified_g__Arsenophonus	OTU210	0	0	0	0	0	0	0	0	0	0	0	0	0	0	0	0	0	0	0	0	0	0	0	0	0	0	0	0	0	0	0	0	0	0	0	0	0	0	0	0	0
d__Bacteria	k__norank	p__Proteobacteria	c__Alphaproteobacteria	o__Rickettsiales	f__Rickettsiaceae	g__Rickettsia	s__unclassified_g__Rickettsia	OTU211	0	0	0	0	0	0	0	0	0	1	0	0	0	0	19	0	0	0	0	0	0	0	0	0	0	0	0	1	0	462	0	0	0	0	0	0	0	0	0	0	0
d__Bacteria	k__norank	p__Firmicutes	c__Bacilli	o__Bacillales	f__Family_XII_o__Bacillales	g__Exiguobacterium	s__unclassified_g__Exiguobacterium	OTU212	0	0	0	1	0	0	0	0	0	0	2	0	0	0	0	0	0	0	0	0	0	0	1	0	0	0	0	0	0	0	0	0	1	0	0	0	0	0	0	0	0
d__Bacteria	k__norank	p__Bacteroidetes	c__Bacteroidetes_VC2.1_Bac22	o__norank_c__Bacteroidetes_VC2.1_Bac22	f__norank_c__Bacteroidetes_VC2.1_Bac22	g__norank_c__Bacteroidetes_VC2.1_Bac22	s__uncultured_bacterium_g__norank_c__Bacteroidetes_VC2.1_Bac22	OTU213	0	0	0	0	0	0	0	0	0	2	0	0	0	0	0	0	0	0	0	0	0	0	0	0	0	0	0	0	0	0	0	0	0	0	0	0	0	0	0	0	0
d__Bacteria	k__norank	p__Proteobacteria	c__Gammaproteobacteria	o__Xanthomonadales	f__Xanthomonadaceae	g__Lysobacter	s__Lysobacter_enzymogenes	OTU214	0	0	0	0	0	0	0	0	0	0	0	0	0	0	0	0	0	0	0	0	0	0	0	0	0	0	0	0	0	0	0	0	0	0	0	0	0	0	0	0	0
d__Bacteria	k__norank	p__Proteobacteria	c__Alphaproteobacteria	o__Rhizobiales	f__Hyphomicrobiaceae	g__norank_f__Hyphomicrobiaceae	s__uncultured_Rhizobiales_bacterium_g__norank_f__Hyphomicrobiaceae	OTU215	0	0	0	0	0	0	0	0	0	0	0	0	0	0	0	3	1	0	0	0	0	5	0	1	0	0	0	0	0	0	0	0	0	0	0	0	0	0	0	0	0
d__Bacteria	k__norank	p__Cyanobacteria	c__Cyanobacteria	o__norank_c__Cyanobacteria	f__norank_c__Cyanobacteria	g__norank_c__Cyanobacteria	s__uncultured_Desulfuromonadaceae_bacterium_g__norank	OTU216	0	0	0	0	0	0	0	0	0	0	0	0	0	0	0	0	0	0	0	0	0	0	0	0	0	0	0	0	0	0	0	0	0	0	0	6	0	0	0	0	0
d__Bacteria	k__norank	p__Firmicutes	c__Bacilli	o__Bacillales	f__Staphylococcaceae	g__Staphylococcus	s__Staphylococcus_sciuri_subsp._sciuri	OTU217	0	0	0	0	0	0	0	0	1	1	4	0	0	0	0	72	9	371	0	0	0	0	0	1	0	0	0	0	0	0	0	0	0	16	29	26	0	0	0	0	0
d__Bacteria	k__norank	p__Proteobacteria	c__Gammaproteobacteria	o__Xanthomonadales	f__Xanthomonadaceae	g__Luteibacter	s__uncultured_Dyella_sp._g__Luteibacter	OTU218	0	0	0	0	0	0	0	0	0	0	0	0	0	0	0	0	0	0	0	0	0	25	1	1	0	0	0	0	0	0	0	0	0	0	0	0	0	0	0	0	0
d__Bacteria	k__norank	p__Proteobacteria	c__Gammaproteobacteria	o__Enterobacteriales	f__Enterobacteriaceae	g__Serratia	s__unclassified_g__Serratia	OTU219	0	0	0	2	0	0	12	4	10	1	0	0	2	0	2	0	1	0	0	0	0	0	1	0	0	1	2	0	0	0	0	0	0	3	8	1	1	0	0	2	2
d__Bacteria	k__norank	p__Proteobacteria	c__Gammaproteobacteria	o__Enterobacteriales	f__Enterobacteriaceae	g__Serratia	s__unclassified_g__Serratia	OTU22	0	0	0	0	0	3421	0	0	0	0	0	0	0	0	0	0	0	0	0	0	0	0	0	0	0	0	0	0	0	0	0	0	0	0	0	0	0	0	0	0	0
d__Bacteria	k__norank	p__Proteobacteria	c__Alphaproteobacteria	o__Rhizobiales	f__Bradyrhizobiaceae	g__Bradyrhizobium	s__unclassified_g__Bradyrhizobium	OTU220	0	0	1	0	0	0	0	0	0	0	0	0	0	0	0	0	0	0	0	0	0	2	0	0	0	1	2	0	0	0	0	0	0	0	0	0	1	0	0	1	0
d__Bacteria	k__norank	p__Cyanobacteria	c__Cyanobacteria	o__norank_c__Cyanobacteria	f__norank_c__Cyanobacteria	g__norank_c__Cyanobacteria	s__Platanus_occidentalis_g__norank	OTU221	0	0	0	3	0	3	0	0	1	3	5	9	6	0	0	7	12	3	0	0	1	0	0	5	0	0	1	0	1	2	0	0	1	0	1	1	2	0	0	54	14
d__Bacteria	k__norank	p__Proteobacteria	c__Gammaproteobacteria	o__Enterobacteriales	f__Enterobacteriaceae	g__Escherichia-Shigella	s__unclassified_g__Escherichia-Shigella	OTU222	1	0	0	0	0	0	0	0	0	0	1	0	0	0	0	3	9	5	0	0	1	0	0	0	0	0	0	2	2	0	0	1	0	0	1	0	9	9	10	9	5
d__Bacteria	k__norank	p__Proteobacteria	c__Gammaproteobacteria	o__Enterobacteriales	f__Enterobacteriaceae	g__Buchnera	s__Buchnera_aphidicola__Sitobion_miscanthi_	OTU223	0	0	0	0	0	0	0	0	0	0	0	0	0	0	0	0	0	0	0	0	0	0	0	0	0	0	0	0	0	0	0	0	0	0	0	0	1	0	1	0	0
d__Bacteria	k__norank	p__Proteobacteria	c__Betaproteobacteria	o__Burkholderiales	f__Oxalobacteraceae	g__Herbaspirillum	s__Herbaspirillum_seropedicae	OTU224	1	6	0	0	0	0	0	0	0	0	0	0	0	0	0	0	32	1	0	0	0	96	17	30	0	0	0	0	1	0	2	0	0	0	0	0	560	0	0	0	0
d__Bacteria	k__norank	p__Bacteroidetes	c__unclassified_p__Bacteroidetes	o__unclassified_p__Bacteroidetes	f__unclassified_p__Bacteroidetes	g__unclassified_p__Bacteroidetes	s__unclassified_p__Bacteroidetes	OTU225	0	0	0	0	0	0	0	0	0	0	0	0	0	0	0	0	0	0	0	0	0	0	0	0	0	0	0	0	0	0	0	0	0	0	0	0	5	8	0	0	0
d__Bacteria	k__norank	p__Proteobacteria	c__Betaproteobacteria	o__unclassified_c__Betaproteobacteria	f__unclassified_c__Betaproteobacteria	g__unclassified_c__Betaproteobacteria	s__unclassified_c__Betaproteobacteria	OTU226	0	0	0	0	0	0	0	0	0	0	0	0	0	0	0	0	0	0	0	0	0	0	0	0	0	0	0	0	0	0	0	0	0	0	0	0	0	3	0	0	0
d__Bacteria	k__norank	p__Firmicutes	c__Bacilli	o__Lactobacillales	f__Lactobacillaceae	g__Lactobacillus	s__unclassified_g__Lactobacillus	OTU227	0	0	0	0	0	0	0	0	1	0	0	0	0	1	0	0	0	0	0	0	0	0	0	0	0	0	0	0	0	0	0	0	0	0	0	0	0	5	0	0	0
d__Bacteria	k__norank	p__Tenericutes	c__Mollicutes	o__Entomoplasmatales	f__Spiroplasmataceae	g__Spiroplasma	s__unclassified_g__Spiroplasma	OTU228	32	22	22	0	0	0	134	14	177	43	13	150	0	5	15	0	0	0	0	0	0	0	9	0	54	0	0	79	31	14	0	252	254	191	243	0	0	50	67	0	0
d__Bacteria	k__norank	p__Fusobacteria	c__Fusobacteriia	o__Fusobacteriales	f__Fusobacteriaceae	g__Fusobacterium	s__Fusobacterium_periodonticum	OTU229	0	0	0	0	0	0	0	0	0	0	0	0	0	0	0	0	1	0	0	0	0	0	3	3	0	0	0	0	0	0	0	0	0	0	0	0	0	0	0	3	1
d__Bacteria	k__norank	p__Firmicutes	c__Bacilli	o__Bacillales	f__Bacillaceae	g__Bacillus	s__unclassified_g__Bacillus	OTU23	0	0	0	0	0	0	21	0	1	0	0	0	0	1	0	0	0	0	0	0	0	0	0	0	0	0	0	0	0	0	0	0	0	0	0	0	0	0	0	0	0
d__Bacteria	k__norank	p__Firmicutes	c__Bacilli	o__Bacillales	f__Bacillaceae	g__unclassified_f__Bacillaceae	s__unclassified_f__Bacillaceae	OTU230	0	0	0	0	1	0	0	0	0	0	0	0	0	0	0	1	7	2	0	0	0	9	0	1	0	0	0	0	0	0	0	2	3	0	0	0	0	3	3	8	4
d__Bacteria	k__norank	p__Proteobacteria	c__Gammaproteobacteria	o__Legionellales	f__Coxiellaceae	g__Diplorickettsia	s__unclassified_g__Diplorickettsia	OTU231	0	0	0	0	0	0	0	0	0	0	0	0	0	0	0	0	0	0	0	0	0	0	0	0	1	0	0	0	0	0	0	0	0	0	0	0	21758	18623	15715	0	0
d__Bacteria	k__norank	p__Proteobacteria	c__Alphaproteobacteria	o__Rickettsiales	f__Rickettsiaceae	g__Rickettsia	s__uncultured_bacterium_g__Rickettsia	OTU232	0	0	0	0	0	0	0	0	0	0	1	0	0	0	0	0	0	0	0	0	0	0	0	0	0	0	0	0	0	22	0	0	0	0	0	0	0	1	0	0	0
d__Bacteria	k__norank	p__Proteobacteria	c__Alphaproteobacteria	o__Rickettsiales	f__Rickettsiaceae	g__Rickettsia	s__uncultured_bacterium_g__Rickettsia	OTU234	0	0	0	0	0	0	0	0	0	0	0	0	0	0	0	0	0	0	0	0	0	0	0	0	0	0	0	0	0	13	0	0	0	0	0	0	0	0	0	0	0
d__Bacteria	k__norank	p__Proteobacteria	c__Alphaproteobacteria	o__Rickettsiales	f__Rickettsiaceae	g__Rickettsia	s__unclassified_g__Rickettsia	OTU235	0	0	0	0	0	0	0	0	0	0	3	0	0	0	0	0	0	0	0	0	0	0	0	0	0	0	0	1	0	0	0	0	0	0	0	0	0	0	0	0	0
d__Bacteria	k__norank	p__Bacteroidetes	c__Sphingobacteriia	o__Sphingobacteriales	f__Sphingobacteriaceae	g__Mucilaginibacter	s__uncultured_bacterium_g__Mucilaginibacter	OTU236	0	1	8	0	0	0	0	0	0	0	0	0	0	0	0	0	0	0	0	0	0	4	33	7	0	1	0	0	0	0	0	0	0	0	0	0	0	0	0	0	0
d__Bacteria	k__norank	p__Firmicutes	c__Bacilli	o__Lactobacillales	f__Carnobacteriaceae	g__Carnobacterium	s__Carnobacterium_inhibens_subsp._inhibens_DSM_13024	OTU237	0	0	0	0	0	0	0	0	0	0	0	0	0	1	0	0	0	0	0	0	0	0	0	0	0	0	0	0	0	0	0	0	0	0	0	0	0	0	0	0	0
d__Bacteria	k__norank	p__Firmicutes	c__Bacilli	o__Bacillales	f__Planococcaceae	g__Planomicrobium	s__unclassified_g__Planomicrobium	OTU239	0	0	0	0	0	0	0	0	0	0	2	0	0	0	0	0	0	0	0	0	0	0	0	0	0	1	0	0	0	0	0	0	0	0	0	0	0	0	0	0	0
d__Bacteria	k__norank	p__Actinobacteria	c__Actinobacteria	o__Micrococcales	f__Microbacteriaceae	g__Microbacterium	s__Microbacterium_laevaniformans	OTU24	0	4	13	1	0	0	0	6859	1	1	4	0	0	0	0	100	484	310	0	2	10	304	117	652	0	0	0	1	1	1	0	0	0	0	4	1	0	0	0	0	0
d__Bacteria	k__norank	p__Proteobacteria	c__Betaproteobacteria	o__Burkholderiales	f__Comamonadaceae	g__Mitsuaria	s__Mitsuaria_chitosanitabida_g__Mitsuaria	OTU242	0	0	3	0	0	0	0	0	0	0	0	0	0	0	0	0	0	0	0	0	0	2	0	6	0	0	0	0	0	0	0	0	0	1	0	0	0	0	0	0	0
d__Bacteria	k__norank	p__Bacteroidetes	c__Cytophagia	o__Cytophagales	f__Flammeovirgaceae	g__Candidatus_Cardinium	s__uncultured_bacterium_g__Candidatus_Cardinium	OTU243	0	0	1	0	0	0	478	7	228	1	0	0	0	0	0	0	0	0	0	0	0	0	0	0	1	1	0	66	12	71	0	0	0	1	15	0	0	10	0	0	0
d__Bacteria	k__norank	p__Firmicutes	c__Bacilli	o__Bacillales	f__Bacillaceae	g__Bacillus	s__unclassified_g__Bacillus	OTU244	0	0	0	0	0	0	0	0	1	2	7	4	0	0	0	0	0	0	1	1	2	1	0	0	0	1	1	0	0	0	0	0	0	0	0	1	0	0	0	0	6
d__Bacteria	k__norank	p__Proteobacteria	c__Alphaproteobacteria	o__Sphingomonadales	f__Sphingomonadaceae	g__Sphingomonas	s__Sphingomonas_melonis_g__Sphingomonas	OTU245	3	8	91	1	1	0	0	0	0	0	9	5	0	0	0	8	20	4	2	3	2	9	5	5	1	4	3	0	0	3	1	2	1	0	0	3	1	0	1	6	24
d__Bacteria	k__norank	p__Actinobacteria	c__Actinobacteria	o__Micrococcales	f__Brevibacteriaceae	g__Brevibacterium	s__unclassified_g__Brevibacterium	OTU246	0	0	0	1	0	0	0	0	0	0	0	0	0	0	0	0	0	0	0	0	0	6	0	0	0	0	0	0	0	0	0	0	0	0	0	0	1	0	0	6	0
d__Bacteria	k__norank	p__Actinobacteria	c__Actinobacteria	o__Corynebacteriales	f__Corynebacteriaceae	g__Corynebacterium_1	s__Corynebacterium_tuberculostearicum	OTU247	1	0	0	4	1	1	0	1	0	0	5	0	1	0	0	5	0	1	0	0	0	19	6	1	0	2	0	0	0	1	1	8	13	0	0	1	1	0	0	59	9
d__Bacteria	k__norank	p__Proteobacteria	c__Alphaproteobacteria	o__Rhizobiales	f__Bradyrhizobiaceae	g__Bosea	s__unclassified_g__Bosea	OTU248	19	8	23	0	0	0	0	0	0	0	0	0	0	0	0	0	0	0	0	0	0	2	3	2	0	0	0	0	0	0	0	0	0	1	3	2	0	0	0	21	5
d__Bacteria	k__norank	p__Firmicutes	c__Bacilli	o__Bacillales	f__Staphylococcaceae	g__Staphylococcus	s__unclassified_g__Staphylococcus	OTU249	1	0	0	0	0	0	0	70	1	0	5	1	0	1	0	1	0	0	0	0	0	4	0	1	0	0	0	0	0	0	0	2	0	2	1	2	0	0	0	18	3
d__Bacteria	k__norank	p__Proteobacteria	c__Alphaproteobacteria	o__Rhizobiales	f__Rhizobiaceae	g__Rhizobium	s__unclassified_g__Rhizobium	OTU250	0	0	1	0	0	0	0	0	0	0	0	0	0	0	0	0	0	0	0	0	0	0	0	0	0	0	0	0	0	0	0	0	0	1	1	0	0	0	0	0	0
d__Bacteria	k__norank	p__Actinobacteria	c__Actinobacteria	o__Corynebacteriales	f__Corynebacteriaceae	g__Corynebacterium_1	s__Corynebacterium_singulare	OTU251	0	0	0	1	1	1	0	0	0	0	0	0	0	0	0	1	0	0	0	0	0	5	1	0	0	0	0	0	0	0	0	8	2	0	0	0	0	0	0	27	4
d__Bacteria	k__norank	p__Actinobacteria	c__Actinobacteria	o__Propionibacteriales	f__Propionibacteriaceae	g__Propionibacterium	s__Propionibacterium_granulosum	OTU252	0	0	0	0	0	0	1	0	0	1	0	0	0	0	0	0	0	0	0	0	0	1	0	0	0	0	0	0	0	0	1	0	0	0	0	0	0	0	0	3	0
d__Bacteria	k__norank	p__Actinobacteria	c__Actinobacteria	o__Corynebacteriales	f__Corynebacteriaceae	g__Lawsonella	s__unclassified_g__Lawsonella	OTU253	0	0	1	0	1	0	0	0	0	1	0	1	0	0	0	1	0	0	1	0	0	1	7	3	0	0	0	0	0	0	0	5	2	0	0	0	0	0	0	23	2
d__Bacteria	k__norank	p__Proteobacteria	c__Gammaproteobacteria	o__Pseudomonadales	f__Pseudomonadaceae	g__Azotobacter	s__unclassified_g__Azotobacter	OTU254	1	0	0	0	0	0	0	0	0	0	0	0	0	0	0	0	0	0	0	0	0	10	0	3	0	0	0	0	0	0	0	0	0	0	1	0	0	0	0	0	0
d__Bacteria	k__norank	p__Saccharibacteria	c__norank_p__Saccharibacteria	o__norank_p__Saccharibacteria	f__norank_p__Saccharibacteria	g__norank_p__Saccharibacteria	s__unclassified_g__norank_p__Saccharibacteria	OTU255	0	0	0	0	0	0	0	0	0	0	0	0	0	0	0	0	0	0	0	0	0	0	0	0	0	0	0	0	0	0	0	0	0	0	0	0	0	0	0	1	0
d__Bacteria	k__norank	p__Proteobacteria	c__Alphaproteobacteria	o__Sphingomonadales	f__Sphingomonadaceae	g__Sphingomonas	s__Sphingomonas_koreensis_g__Sphingomonas	OTU256	35	20	26	0	0	0	0	0	0	0	0	0	0	1	0	1	0	0	0	0	0	0	1	0	0	0	0	0	1	0	0	0	0	0	1	0	0	0	0	37	8
d__Bacteria	k__norank	p__Proteobacteria	c__Alphaproteobacteria	o__Rhizobiales	f__Aurantimonadaceae	g__Aureimonas	s__uncultured_bacterium_g__Aureimonas	OTU257	4	15	36	1	0	0	0	0	0	0	0	0	0	0	0	0	0	0	1	0	8	0	0	0	1	0	1	0	0	0	0	0	0	0	0	2	5	1	0	16	173
d__Bacteria	k__norank	p__Proteobacteria	c__Alphaproteobacteria	o__Sphingomonadales	f__Sphingomonadaceae	g__Sphingomonas	s__Sphingomonas_paucimobilis_g__Sphingomonas	OTU258	4	7	51	1	0	0	0	0	0	0	0	1	0	0	0	57	107	57	0	1	4	41	43	45	2	6	4	1	0	0	2	1	0	0	0	0	5	0	1	5	380
d__Bacteria	k__norank	p__Proteobacteria	c__Alphaproteobacteria	o__Rhizobiales	f__Methylobacteriaceae	g__Methylobacterium	s__unclassified_g__Methylobacterium	OTU259	3	5	18	1	0	0	0	0	0	1	0	0	0	0	0	0	6	1	1	0	1	18	9	8	0	3	5	0	0	0	0	0	0	0	0	0	0	1	0	0	3
d__Bacteria	k__norank	p__Deinococcus-Thermus	c__Deinococci	o__Deinococcales	f__Deinococcaceae	g__Deinococcus	s__Deinococcus_sp._Lab-1	OTU26	0	0	0	0	0	0	0	0	0	0	0	0	0	0	0	0	0	0	0	0	0	0	0	0	0	0	0	0	0	0	0	0	0	0	0	0	0	0	0	1	0
d__Bacteria	k__norank	p__Proteobacteria	c__Alphaproteobacteria	o__Rhizobiales	f__Methylobacteriaceae	g__Methylobacterium	s__Methylobacterium_aquaticum	OTU260	2	9	33	0	0	0	0	0	1	0	3	1	0	0	0	1	6	1	1	0	0	7	1	19	3	8	5	0	0	0	0	0	1	0	0	0	6	1	2	2	47
d__Bacteria	k__norank	p__Firmicutes	c__Clostridia	o__Thermoanaerobacterales	f__Family_III	g__Thermoanaerobacterium	s__Thermoanaerobacterium_thermosaccharolyticum_DSM_571	OTU261	0	0	0	0	0	0	0	0	0	0	0	0	0	0	0	0	0	0	0	0	0	0	0	0	0	0	0	0	0	0	0	0	0	0	0	0	0	0	0	0	0
d__Bacteria	k__norank	p__Actinobacteria	c__Actinobacteria	o__Frankiales	f__Sporichthyaceae	g__hgcI_clade	s__uncultured_Candidatus_Planktophila_sp.	OTU262	0	0	0	0	0	0	0	0	1	0	0	0	0	0	0	0	0	0	0	0	0	0	1	0	0	0	1	0	0	0	0	0	0	0	0	0	1	0	0	0	0
d__Bacteria	k__norank	p__Proteobacteria	c__Gammaproteobacteria	o__Enterobacteriales	f__Enterobacteriaceae	g__Pantoea	s__unclassified_g__Pantoea	OTU263	0	0	1	0	0	0	0	0	0	0	0	0	0	0	0	0	0	0	0	0	0	0	0	2	0	0	0	2	3	0	0	0	0	0	0	0	0	0	11	0	8
d__Bacteria	k__norank	p__Firmicutes	c__Bacilli	o__Bacillales	f__Bacillaceae	g__Bacillus	s__Bacillus_subterraneus	OTU267	0	0	0	0	0	0	0	0	0	0	3	2	0	0	0	0	0	0	0	0	0	0	0	0	0	0	0	0	0	0	0	0	0	0	0	0	0	0	0	0	0
d__Bacteria	k__norank	p__Firmicutes	c__Bacilli	o__Bacillales	f__Bacillaceae	g__unclassified_f__Bacillaceae	s__unclassified_f__Bacillaceae	OTU268	0	0	0	0	0	0	0	0	0	0	0	5	0	0	0	0	0	1	0	0	0	0	0	0	0	0	0	0	0	6	0	0	0	1	0	0	0	0	0	0	0
d__Bacteria	k__norank	p__Firmicutes	c__Bacilli	o__Lactobacillales	f__Streptococcaceae	g__Lactococcus	s__unclassified_g__Lactococcus	OTU269	0	0	1	0	0	0	0	0	0	0	1	6	0	0	0	0	0	0	0	0	0	0	0	0	0	0	0	0	0	0	0	0	0	0	0	0	0	2	0	0	0
d__Bacteria	k__norank	p__Firmicutes	c__Bacilli	o__Lactobacillales	f__Lactobacillaceae	g__Lactobacillus	s__unclassified_g__Lactobacillus	OTU27	0	0	0	0	0	0	0	0	0	5	0	2	0	0	0	0	0	0	0	0	0	0	0	0	0	0	0	0	0	2	0	0	0	0	0	0	0	0	0	0	0
d__Bacteria	k__norank	p__Bacteroidetes	c__Flavobacteriia	o__Flavobacteriales	f__Flavobacteriaceae	g__Flavobacterium	s__unclassified_g__Flavobacterium	OTU270	0	0	1	0	0	0	0	0	0	0	0	0	0	0	0	0	0	0	0	0	0	0	0	0	0	0	0	0	0	0	0	0	0	0	0	2	0	0	0	0	0
d__Bacteria	k__norank	p__Bacteroidetes	c__Sphingobacteriia	o__Sphingobacteriales	f__Chitinophagaceae	g__Taibaiella	s__uncultured_bacterium_g__Taibaiella	OTU275	0	1	0	0	0	0	0	0	0	0	0	0	0	0	0	0	0	0	0	0	0	0	0	0	0	0	0	0	0	0	0	0	0	0	1	2	0	0	0	0	0
d__Bacteria	k__norank	p__Proteobacteria	c__Deltaproteobacteria	o__Bdellovibrionales	f__Bdellovibrionaceae	g__Bdellovibrio	s__unclassified_g__Bdellovibrio	OTU276	0	0	0	0	0	0	0	0	0	0	0	0	0	0	0	0	0	0	0	0	0	0	0	0	0	0	0	0	0	0	0	0	0	0	1	3	0	0	0	0	0
d__Bacteria	k__norank	p__Bacteroidetes	c__Cytophagia	o__Cytophagales	f__Cytophagaceae	g__Siphonobacter	s__Siphonobacter_aquaeclarae	OTU278	0	0	0	0	0	0	0	0	0	0	0	0	0	0	0	0	0	1	1	0	0	0	0	0	0	0	1	0	0	0	0	0	0	0	0	1	0	0	0	0	0
d__Bacteria	k__norank	p__Firmicutes	c__Bacilli	o__Lactobacillales	f__Lactobacillaceae	g__Pediococcus	s__Pediococcus_pentosaceus_g__Pediococcus	OTU28	0	0	0	0	0	0	0	0	0	0	2	1	0	0	0	0	0	0	0	0	0	0	0	0	0	0	0	0	1	0	0	0	0	0	0	0	0	0	0	0	0
d__Bacteria	k__norank	p__Proteobacteria	c__Alphaproteobacteria	o__Rhizobiales	f__Xanthobacteraceae	g__Labrys	s__unclassified_g__Labrys	OTU280	0	0	0	0	0	0	0	0	0	0	0	0	0	0	0	0	0	2	0	0	0	3	0	1	0	0	0	0	0	0	0	0	0	0	2	0	0	0	0	0	0
d__Bacteria	k__norank	p__Proteobacteria	c__Gammaproteobacteria	o__Pseudomonadales	f__Moraxellaceae	g__Acinetobacter	s__Acinetobacter_sp._ADP1	OTU281	0	0	0	0	0	0	0	0	0	0	0	0	0	0	0	0	0	0	1	0	11	1000	101	802	0	0	0	0	0	0	0	0	0	13	11	11	0	0	0	0	0
d__Bacteria	k__norank	p__Proteobacteria	c__Betaproteobacteria	o__Burkholderiales	f__Comamonadaceae	g__Pseudacidovorax	s__Pseudacidovorax_intermedius	OTU282	0	0	2	0	0	0	0	0	0	0	0	0	0	0	0	0	3	0	0	0	1	5	0	3	0	0	0	0	0	0	0	0	0	0	0	0	0	0	0	0	0
d__Bacteria	k__norank	p__Proteobacteria	c__Alphaproteobacteria	o__Rhodospirillales	f__Rhodospirillaceae	g__Azospirillum	s__unclassified_g__Azospirillum	OTU283	0	0	0	1	0	0	0	0	0	0	0	0	0	0	0	0	0	0	0	0	0	0	0	0	0	1	0	0	0	0	0	0	0	0	3	0	0	0	0	0	0
d__Bacteria	k__norank	p__Verrucomicrobia	c__Verrucomicrobiae	o__Verrucomicrobiales	f__Verrucomicrobiaceae	g__Verrucomicrobium	s__uncultured_bacterium_g__Verrucomicrobium	OTU284	0	0	0	0	0	0	0	0	0	0	0	0	0	0	0	0	0	0	0	0	0	0	0	0	0	0	0	0	0	0	0	0	0	1	0	0	0	0	0	0	0
d__Bacteria	k__norank	p__Proteobacteria	c__Deltaproteobacteria	o__Bdellovibrionales	f__Bacteriovoracaceae	g__Bacteriovorax	s__uncultured_bacterium_g__Bacteriovorax	OTU285	0	0	0	0	0	0	0	0	0	0	0	0	0	0	0	0	0	0	0	0	0	0	0	0	0	0	0	0	0	0	0	0	0	0	2	0	0	0	0	0	0
d__Bacteria	k__norank	p__Proteobacteria	c__Betaproteobacteria	o__Burkholderiales	f__Comamonadaceae	g__Comamonas	s__Comamonas_koreensis	OTU286	0	0	0	0	0	0	0	0	0	0	0	0	0	0	0	0	2	0	0	0	0	0	0	0	0	0	0	0	0	0	0	0	0	3	1	3	0	0	0	0	0
d__Bacteria	k__norank	p__Proteobacteria	c__Gammaproteobacteria	o__Xanthomonadales	f__Solimonadaceae	g__norank_f__Solimonadaceae	s__uncultured_bacterium_g__norank_f__Solimonadaceae	OTU289	0	0	0	0	0	0	0	0	0	0	0	0	0	0	0	0	0	0	0	0	1	0	0	0	0	0	0	0	0	0	0	0	0	0	0	0	0	0	0	0	0
d__Bacteria	k__norank	p__Firmicutes	c__Clostridia	o__Clostridiales	f__Clostridiaceae_1	g__Clostridium_sensu_stricto_1	s__unclassified_g__Clostridium_sensu_stricto_1	OTU29	1	0	0	0	0	1	0	1	2	0	1	0	0	0	0	0	0	0	0	0	0	1	0	0	0	0	0	0	0	0	0	0	0	0	0	0	0	0	0	0	0
d__Bacteria	k__norank	p__Saccharibacteria	c__norank_p__Saccharibacteria	o__norank_p__Saccharibacteria	f__norank_p__Saccharibacteria	g__norank_p__Saccharibacteria	s__unclassified_g__norank_p__Saccharibacteria	OTU290	0	0	2	0	0	0	0	0	0	0	1	0	0	0	0	0	0	0	0	0	0	7	7	3	0	0	0	0	0	0	0	0	0	0	1	0	0	0	0	0	0
d__Bacteria	k__norank	p__Proteobacteria	c__Gammaproteobacteria	o__Xanthomonadales	f__Nevskiaceae	g__Hydrocarboniphaga	s__uncultured_bacterium_g__Hydrocarboniphaga	OTU293	0	0	0	0	0	0	0	0	0	0	0	0	0	0	0	0	0	2	0	0	0	0	0	0	0	0	0	0	0	0	0	0	0	0	0	0	0	0	0	0	0
d__Bacteria	k__norank	p__Firmicutes	c__Bacilli	o__Bacillales	f__Paenibacillaceae	g__Paenibacillus	s__Paenibacillus_barcinonensis	OTU294	0	0	0	1	0	0	1	0	0	0	0	0	0	0	0	0	0	0	0	0	0	0	0	0	0	0	0	0	0	0	0	0	0	0	0	0	0	0	0	0	0
d__Bacteria	k__norank	p__Actinobacteria	c__Actinobacteria	o__Propionibacteriales	f__Propionibacteriaceae	g__Propionibacterium	s__Propionibacterium_acnes_subsp._acnes_g__Propionibacterium	OTU295	7	0	0	5	5	0	1	1	0	1	2	0	1	0	2	4	5	0	0	0	1	45	10	8	0	0	0	1	1	0	5	21	8	1	0	0	0	0	0	144	26
d__Bacteria	k__norank	p__Proteobacteria	c__Alphaproteobacteria	o__Caulobacterales	f__Caulobacteraceae	g__Brevundimonas	s__Brevundimonas_nasdae	OTU297	0	1	26	0	0	0	0	0	0	1	0	0	0	0	0	0	1	0	0	1	1	0	6	0	0	0	0	0	0	0	0	1	0	0	0	1	0	0	0	0	2
d__Bacteria	k__norank	p__Proteobacteria	c__Alphaproteobacteria	o__Rhizobiales	f__Methylocystaceae	g__norank_f__Methylocystaceae	s__Methylopila_sp._73B	OTU298	0	0	0	0	0	0	0	0	0	0	0	0	0	0	0	0	0	0	0	0	0	0	0	0	0	0	0	0	0	0	0	0	0	0	2	4	0	0	0	0	0
d__Bacteria	k__norank	p__Proteobacteria	c__Gammaproteobacteria	o__Xanthomonadales	f__Xanthomonadaceae	g__unclassified_f__Xanthomonadaceae	s__unclassified_f__Xanthomonadaceae	OTU299	237	91	190	0	0	0	1	0	1	0	0	2	0	0	0	0	6	11	4	1	5	527	5307	511	32	103	155	0	0	0	0	2	0	5	16	8	0	0	0	155	58
d__Bacteria	k__norank	p__Actinobacteria	c__Actinobacteria	o__Frankiales	f__Geodermatophilaceae	g__Geodermatophilus	s__unclassified_g__Geodermatophilus	OTU3	5	2	20	1	0	0	0	0	0	0	0	0	0	0	0	0	0	0	0	0	0	2	0	2	0	2	0	1	0	0	0	0	0	0	0	0	0	0	0	0	0
d__Bacteria	k__norank	p__Actinobacteria	c__Actinobacteria	o__Micrococcales	f__Microbacteriaceae	g__Agromyces	s__Agromyces_indicus	OTU30	0	0	0	0	0	0	0	0	0	0	2	0	0	0	0	0	0	0	0	0	0	0	0	0	0	0	0	0	0	0	0	0	0	0	0	0	0	0	0	0	0
d__Bacteria	k__norank	p__Proteobacteria	c__Betaproteobacteria	o__Burkholderiales	f__Burkholderiaceae	g__Cupriavidus	s__unclassified_g__Cupriavidus	OTU300	6	3	9	0	0	0	0	0	0	0	0	0	0	0	0	0	0	0	0	0	0	0	0	0	0	0	0	0	0	0	0	0	0	0	0	0	0	0	0	18	0
d__Bacteria	k__norank	p__Proteobacteria	c__Alphaproteobacteria	o__Rickettsiales	f__Anaplasmataceae	g__Wolbachia	s__uncultured_bacterium_g__Wolbachia	OTU301	32613	23332	31458	33905	34041	30610	30259	26739	28930	6875	33537	31465	34090	33930	33762	30637	29485	30228	34033	33993	33396	19045	22392	25099	32577	32273	31610	29421	25159	31455	8611	19872	20790	31129	28693	33613	11609	14021	15705	33232	30706
d__Bacteria	k__norank	p__Proteobacteria	c__Gammaproteobacteria	o__Aeromonadales	f__Aeromonadaceae	g__Aeromonas	s__unclassified_g__Aeromonas	OTU302	0	0	0	0	0	0	2	0	4	0	0	0	0	1	1	0	0	0	1	0	0	0	0	0	0	0	0	0	0	0	1	0	0	0	1	0	0	0	0	0	0
d__Bacteria	k__norank	p__Proteobacteria	c__Gammaproteobacteria	o__Chromatiales	f__Chromatiaceae	g__Rheinheimera	s__Rheinheimera_texasensis	OTU303	0	0	0	0	0	0	0	0	0	0	0	0	0	0	0	0	0	0	0	0	0	0	0	0	0	0	0	0	0	0	0	0	0	0	1	0	0	0	0	0	0
d__Bacteria	k__norank	p__Proteobacteria	c__Betaproteobacteria	o__Neisseriales	f__Neisseriaceae	g__Vogesella	s__Vogesella_perlucida	OTU304	0	0	0	0	0	0	0	0	0	0	0	0	0	0	0	0	0	0	0	0	0	0	0	0	0	0	0	0	0	0	0	0	0	0	0	0	0	0	0	0	0
d__Bacteria	k__norank	p__Proteobacteria	c__Gammaproteobacteria	o__Aeromonadales	f__Aeromonadaceae	g__Aeromonas	s__Aeromonas_hydrophila_YL17	OTU305	0	0	0	0	0	0	0	0	0	0	0	0	0	0	0	0	0	0	0	0	0	0	0	0	0	0	0	0	0	0	0	0	0	0	0	0	0	0	0	0	0
d__Bacteria	k__norank	p__Proteobacteria	c__Gammaproteobacteria	o__Xanthomonadales	f__Xanthomonadaceae	g__Pseudoxanthomonas	s__Pseudoxanthomonas_mexicana	OTU306	0	0	0	0	1	0	0	0	0	0	0	0	0	0	0	0	0	0	0	0	0	0	0	1	0	0	0	0	0	0	0	0	0	1	1	1	0	0	0	0	0
d__Bacteria	k__norank	p__Planctomycetes	c__Planctomycetacia	o__Planctomycetales	f__Planctomycetaceae	g__Isosphaera	s__Isosphaera_pallida_ATCC_43644	OTU307	0	0	0	0	0	0	0	0	0	0	0	0	0	0	0	0	0	0	0	0	0	0	0	0	0	0	0	0	0	0	0	0	0	0	0	0	0	0	0	0	0
d__Bacteria	k__norank	p__Proteobacteria	c__Gammaproteobacteria	o__Pseudomonadales	f__Moraxellaceae	g__Acinetobacter	s__unclassified_g__Acinetobacter	OTU308	0	0	0	0	0	0	0	0	0	0	0	0	0	0	0	0	0	0	0	0	0	0	0	1	0	0	0	0	0	0	0	0	0	0	0	0	0	0	0	0	0
d__Bacteria	k__norank	p__Actinobacteria	c__Actinobacteria	o__Propionibacteriales	f__Nocardioidaceae	g__Nocardioides	s__Nocardioides_kribbensis	OTU309	0	0	0	0	0	0	0	0	3	0	0	0	0	0	0	0	0	0	1	0	0	0	0	0	0	0	0	1	0	0	0	0	0	0	0	1	0	0	0	0	0
d__Bacteria	k__norank	p__Firmicutes	c__Bacilli	o__Bacillales	f__Bacillaceae	g__Bacillus	s__Bacillus_niacini_g__Bacillus	OTU31	0	0	0	0	0	0	1	0	0	0	7	0	0	0	0	0	0	0	0	0	0	0	0	0	0	2	0	0	0	0	0	0	0	0	0	0	0	0	0	0	0
d__Bacteria	k__norank	p__Actinobacteria	c__Actinobacteria	o__Propionibacteriales	f__Nocardioidaceae	g__Marmoricola	s__uncultured_bacterium_g__Marmoricola	OTU310	1	3	0	1	2	0	0	0	0	0	0	0	0	0	0	0	0	0	0	0	0	0	0	0	0	0	0	0	0	0	0	0	0	0	0	0	0	0	0	0	0
d__Bacteria	k__norank	p__Proteobacteria	c__Gammaproteobacteria	o__Pseudomonadales	f__Pseudomonadaceae	g__Pseudomonas	s__Pseudomonas_psychrotolerans	OTU311	1	15	142	21	0	0	1	1	1	0	0	0	0	0	0	0	1	0	1	0	4	1	0	0	0	1	0	0	0	0	0	1	3	0	0	0	1	0	0	2	301
d__Bacteria	k__norank	p__Proteobacteria	c__Gammaproteobacteria	o__Enterobacteriales	f__Enterobacteriaceae	g__unclassified_f__Enterobacteriaceae	s__unclassified_f__Enterobacteriaceae	OTU312	0	0	2	0	0	0	20	21	25	0	1	0	0	1	1	1	40	422	2	3	13	64	3011	37	10	36	81	0	0	0	1	3019	1	1	5	1	1	0	0	1	0
d__Bacteria	k__norank	p__Firmicutes	c__Bacilli	o__Bacillales	f__Family_XII_o__Bacillales	g__Exiguobacterium	s__unclassified_g__Exiguobacterium	OTU313	0	0	0	0	0	1	2	11	18	2	9	3	0	0	0	0	0	0	1	2	3	0	0	0	0	1	0	1	0	0	0	0	0	0	1	0	0	0	0	0	0
d__Bacteria	k__norank	p__Cyanobacteria	c__Cyanobacteria	o__norank_c__Cyanobacteria	f__norank_c__Cyanobacteria	g__norank_c__Cyanobacteria	s__unclassified_g__norank_c__Cyanobacteria	OTU314	0	0	0	0	0	0	0	0	0	0	0	0	0	0	0	0	0	0	0	0	0	0	0	0	0	0	0	0	0	0	0	0	0	0	0	0	0	0	0	0	0
d__Bacteria	k__norank	p__Actinobacteria	c__Actinobacteria	o__Propionibacteriales	f__Nocardioidaceae	g__Aeromicrobium	s__uncultured_bacterium_g__Aeromicrobium	OTU315	0	0	1	0	0	0	0	0	0	0	0	0	1	0	0	0	0	0	0	0	0	1	0	2	0	0	0	0	0	0	0	0	0	0	0	1	0	0	0	0	0
d__Bacteria	k__norank	p__Tenericutes	c__Mollicutes	o__Entomoplasmatales	f__Spiroplasmataceae	g__Spiroplasma	s__uncultured_bacterium_g__Spiroplasma	OTU316	0	0	0	0	0	0	0	0	0	0	0	0	0	0	0	0	0	0	0	0	0	0	0	0	0	0	0	0	1	0	0	0	0	0	0	0	0	0	0	0	0
d__Bacteria	k__norank	p__Actinobacteria	c__Actinobacteria	o__Micrococcales	f__Micrococcaceae	g__Glutamicibacter	s__unclassified_g__Glutamicibacter	OTU318	0	0	0	1	0	0	0	0	0	1	9	1	1	0	0	9	0	0	0	0	1	4	7	2	0	0	0	1	1	0	0	0	0	9	18	8	0	0	0	0	0
d__Bacteria	k__norank	p__Firmicutes	c__Bacilli	o__Bacillales	f__Bacillaceae	g__Bacillus	s__unclassified_g__Bacillus	OTU319	0	0	0	0	0	0	852	20	28	0	0	0	0	4	1	2	0	0	0	0	1	0	0	0	1	0	0	0	0	0	0	0	0	0	0	0	0	0	0	0	0
d__Bacteria	k__norank	p__Actinobacteria	c__Actinobacteria	o__Corynebacteriales	f__Corynebacteriaceae	g__Corynebacterium_1	s__unclassified_g__Corynebacterium_1	OTU32	0	0	0	0	0	0	0	0	0	0	0	0	0	0	0	1	12	0	0	0	0	0	0	0	0	0	0	0	0	0	0	0	0	2	2	0	0	0	0	0	0
d__Bacteria	k__norank	p__Proteobacteria	c__Gammaproteobacteria	o__Pseudomonadales	f__Moraxellaceae	g__Acinetobacter	s__unclassified_g__Acinetobacter	OTU320	1	0	1	0	0	0	5	3	5	0	0	0	2	2	2	0	56	0	0	1	2	8	32	62	12	55	129	0	0	0	1	42	14	1	0	0	1	0	0	2	5
d__Bacteria	k__norank	p__Firmicutes	c__Bacilli	o__Lactobacillales	f__Streptococcaceae	g__Lactococcus	s__unclassified_g__Lactococcus	OTU321	0	0	1	0	0	0	0	0	0	0	1	0	0	1	0	1	1	0	0	0	0	0	0	1	0	0	0	0	0	10	0	0	0	0	0	0	0	0	0	0	0
d__Bacteria	k__norank	p__Proteobacteria	c__Gammaproteobacteria	o__Pseudomonadales	f__Pseudomonadaceae	g__Pseudomonas	s__unclassified_g__Pseudomonas	OTU322	2	0	1	1	0	0	0	1	0	0	0	0	1	0	0	0	7	0	0	0	4	24	9	17	0	0	1	98	14	6	0	0	0	0	0	0	0	1	0	2	0
d__Bacteria	k__norank	p__Proteobacteria	c__Gammaproteobacteria	o__Pseudomonadales	f__Moraxellaceae	g__Acinetobacter	s__Acinetobacter_soli	OTU323	3	0	68	0	0	0	10	10	14	0	1	1	4	0	0	2	63	58	27	42	336	1651	277	874	1	2	11	0	0	0	0	17	7	104	97	36	0	1	0	1	8
d__Bacteria	k__norank	p__Proteobacteria	c__Alphaproteobacteria	o__Caulobacterales	f__Caulobacteraceae	g__Caulobacter	s__Caulobacter_sp._g__Caulobacter	OTU324	0	0	0	0	1	1	0	0	1	1	5	2	0	0	0	0	0	0	0	0	0	3	0	1	0	0	0	0	0	0	0	0	0	0	1	2	0	0	0	0	0
d__Bacteria	k__norank	p__Actinobacteria	c__Actinobacteria	o__Micrococcales	f__Micrococcaceae	g__Arthrobacter	s__Arthrobacter_woluwensis	OTU325	0	0	0	0	0	0	0	0	0	0	1	1	0	0	0	0	0	1	0	0	0	11	6	10	0	0	0	3	7	1	0	0	0	12	31	12	0	0	0	0	0
d__Bacteria	k__norank	p__Proteobacteria	c__Betaproteobacteria	o__Burkholderiales	f__Comamonadaceae	g__Comamonas	s__Comamonas_aquatica	OTU326	0	2	0	0	0	0	0	0	0	0	0	0	0	0	0	0	0	1	0	0	0	0	0	0	0	0	0	0	0	0	0	0	0	0	1	0	0	1	0	1	0
d__Bacteria	k__norank	p__Firmicutes	c__Bacilli	o__Bacillales	f__Planococcaceae	g__Lysinibacillus	s__unclassified_g__Lysinibacillus	OTU327	0	0	0	0	0	0	0	0	0	0	0	0	0	0	0	0	0	0	0	0	0	1	0	0	0	0	0	0	0	0	0	0	0	0	0	0	0	0	0	0	0
d__Bacteria	k__norank	p__Proteobacteria	c__Betaproteobacteria	o__Burkholderiales	f__Oxalobacteraceae	g__Massilia	s__Massilia_aurea	OTU328	2	3	1	3	0	0	0	0	0	0	0	0	0	0	1	0	0	0	0	0	0	1	0	0	0	5	4	2	0	31	0	0	0	0	0	0	1	0	0	0	1
d__Bacteria	k__norank	p__Proteobacteria	c__Betaproteobacteria	o__Burkholderiales	f__Comamonadaceae	g__Comamonas	s__Comamonas_testosteroni_g__Comamonas	OTU329	0	0	0	0	0	0	71	1	1	0	1	0	0	0	1	0	0	0	0	0	0	0	0	0	0	1	1	0	0	0	0	0	0	0	3	4	0	0	0	0	0
d__Bacteria	k__norank	p__Bacteroidetes	c__Sphingobacteriia	o__Sphingobacteriales	f__Chitinophagaceae	g__Chitinophaga	s__unclassified_g__Chitinophaga	OTU33	0	0	0	0	0	0	0	0	0	0	0	0	0	0	0	9	13	4	0	0	0	0	0	0	0	0	0	0	0	0	0	0	0	0	0	0	0	0	0	0	0
d__Bacteria	k__norank	p__Proteobacteria	c__Gammaproteobacteria	o__Pseudomonadales	f__Pseudomonadaceae	g__Pseudomonas	s__unclassified_g__Pseudomonas	OTU330	15	5	127	0	0	0	0	0	0	0	1	1	0	2	0	1	5	0	24	28	100	20	9	43	2	32	18	0	0	0	0	0	1	1	5	0	0	0	0	2	1
d__Bacteria	k__norank	p__Proteobacteria	c__Betaproteobacteria	o__Burkholderiales	f__Comamonadaceae	g__Comamonas	s__Comamonas_koreensis	OTU331	0	1	0	0	0	0	0	0	0	0	0	0	0	0	0	0	0	0	0	0	0	0	0	0	0	0	0	0	0	0	0	0	0	0	0	0	0	0	0	0	0
d__Bacteria	k__norank	p__Firmicutes	c__Bacilli	o__Bacillales	f__Bacillaceae	g__Bacillus	s__Bacillus_lehensis_G1	OTU333	0	0	0	0	0	0	2	0	1	0	0	0	0	0	0	0	0	0	0	0	0	0	0	0	0	0	0	0	0	0	0	0	0	1	0	0	0	0	0	0	0
d__Bacteria	k__norank	p__Firmicutes	c__Clostridia	o__Clostridiales	f__Clostridiaceae_1	g__Sarcina	s__uncultured_Firmicutes_bacterium_g__Sarcina	OTU335	0	0	0	0	0	0	0	0	0	0	0	0	0	0	0	0	0	0	0	0	0	0	0	0	0	0	0	0	0	11	0	0	0	1	0	0	0	0	0	0	0
d__Bacteria	k__norank	p__Proteobacteria	c__Betaproteobacteria	o__Neisseriales	f__Neisseriaceae	g__Neisseria	s__unclassified_g__Neisseria	OTU336	0	0	0	0	0	0	0	0	0	0	0	1	0	0	0	0	0	0	0	0	0	1	2	1	0	0	0	0	0	0	0	0	2	0	0	0	0	0	0	2	0
d__Bacteria	k__norank	p__Deinococcus-Thermus	c__Deinococci	o__Deinococcales	f__Deinococcaceae	g__Deinococcus	s__Deinococcus_grandis	OTU337	1	1	1	0	0	0	0	0	0	0	0	0	1	0	0	0	0	0	0	1	0	0	0	0	0	0	0	1	0	0	0	0	0	0	0	0	0	0	0	0	0
d__Bacteria	k__norank	p__unclassified_k__norank	c__unclassified_k__norank	o__unclassified_k__norank	f__unclassified_k__norank	g__unclassified_k__norank	s__unclassified_k__norank	OTU338	0	0	0	0	0	0	77	2	2	0	0	0	0	1	0	0	0	1	0	0	0	0	0	0	0	0	0	0	0	2	0	0	0	0	2	2	0	0	0	0	0
d__Bacteria	k__norank	p__Actinobacteria	c__Actinobacteria	o__Micrococcales	f__Microbacteriaceae	g__Leucobacter	s__unclassified_g__Leucobacter	OTU339	0	0	0	0	0	0	0	1	0	0	2	1	1	0	0	0	0	0	0	0	1	19	9	23	0	0	0	0	0	0	0	0	1	1	9	4	0	0	0	1	0
d__Bacteria	k__norank	p__Actinobacteria	c__Actinobacteria	o__Micrococcales	f__Micrococcaceae	g__Kocuria	s__unclassified_g__Kocuria	OTU34	0	0	0	2	0	0	1	1	0	0	0	0	0	0	1	11	2	44	0	0	0	0	1	1	0	0	0	0	0	0	0	0	0	0	0	0	0	0	1	1	0
d__Bacteria	k__norank	p__Actinobacteria	c__Actinobacteria	o__Corynebacteriales	f__Nocardiaceae	g__Williamsia	s__uncultured_bacterium_g__Williamsia	OTU340	0	0	4	1	0	0	0	0	0	0	0	0	0	0	0	0	0	0	0	0	0	0	0	0	0	1	0	0	0	0	0	0	0	0	0	0	0	0	0	0	0
d__Bacteria	k__norank	p__Firmicutes	c__Bacilli	o__Lactobacillales	f__Leuconostocaceae	g__Weissella	s__unclassified_g__Weissella	OTU341	0	0	0	0	0	1	0	0	0	0	0	1	0	0	1	0	0	0	0	0	0	0	0	0	0	1	1	0	0	2	0	0	0	0	0	0	0	0	0	0	0
d__Bacteria	k__norank	p__Bacteroidetes	c__Cytophagia	o__Cytophagales	f__Cytophagaceae	g__Hymenobacter	s__unclassified_g__Hymenobacter	OTU342	0	0	0	0	0	0	0	0	0	0	0	0	0	0	0	0	0	0	0	0	0	0	0	0	0	0	0	0	0	0	0	0	0	0	0	0	0	0	0	0	0
d__Bacteria	k__norank	p__Proteobacteria	c__Gammaproteobacteria	o__Enterobacteriales	f__Enterobacteriaceae	g__unclassified_f__Enterobacteriaceae	s__unclassified_f__Enterobacteriaceae	OTU343	0	0	1	0	0	0	0	0	1	2	0	1	0	22	0	0	0	0	2	0	0	0	0	0	0	0	0	0	4	0	1	1	0	0	0	0	0	0	0	0	0
d__Bacteria	k__norank	p__Bacteroidetes	c__Flavobacteriia	o__Flavobacteriales	f__Flavobacteriaceae	g__Flavobacterium	s__unclassified_g__Flavobacterium	OTU344	0	0	0	0	0	0	0	0	1	1	1	3	0	0	0	0	0	0	0	0	0	0	0	0	0	0	0	0	0	0	0	0	0	0	0	0	0	0	0	0	0
d__Bacteria	k__norank	p__Cyanobacteria	c__Cyanobacteria	o__norank_c__Cyanobacteria	f__norank_c__Cyanobacteria	g__norank_c__Cyanobacteria	s__uncultured_Durinskia	OTU345	0	0	1	0	0	0	0	0	0	0	0	0	0	0	0	0	0	0	0	0	0	0	0	0	0	0	2	0	0	0	0	0	1	0	0	0	0	0	0	2	0
d__Bacteria	k__norank	p__Firmicutes	c__Negativicutes	o__Selenomonadales	f__Veillonellaceae	g__Veillonella	s__unclassified_g__Veillonella	OTU347	0	0	0	0	0	0	0	0	0	0	0	0	0	0	0	0	1	0	0	0	0	10	1	1	0	1	0	0	0	0	0	0	0	0	0	0	1	0	0	6	2
d__Bacteria	k__norank	p__Proteobacteria	c__Gammaproteobacteria	o__Pseudomonadales	f__Moraxellaceae	g__Enhydrobacter	s__Moraxella_osloensis_g__Enhydrobacter	OTU35	5	0	0	0	0	0	3	5	7	1	0	2	1	0	0	13	2	0	0	0	0	3	2	5	0	0	1	0	1	0	1	4	0	0	0	0	0	0	0	1	7
d__Bacteria	k__norank	p__Proteobacteria	c__Alphaproteobacteria	o__Sphingomonadales	f__Erythrobacteraceae	g__Porphyrobacter	s__unclassified_g__Porphyrobacter	OTU350	0	0	0	0	0	0	0	0	2	0	0	0	0	0	0	0	0	0	0	0	0	0	0	0	0	0	0	0	0	0	0	0	0	0	0	0	0	0	0	0	0
d__Bacteria	k__norank	p__Proteobacteria	c__Betaproteobacteria	o__Burkholderiales	f__Alcaligenaceae	g__Derxia	s__Derxia_gummosa	OTU352	2	0	2	0	0	0	0	0	0	0	0	0	0	0	0	0	0	0	0	0	0	1	1	0	0	0	0	0	0	0	0	0	1	0	0	0	0	0	0	0	0
d__Bacteria	k__norank	p__Firmicutes	c__Bacilli	o__Lactobacillales	f__Streptococcaceae	g__Streptococcus	s__unclassified_g__Streptococcus	OTU353	0	1	0	0	0	0	0	0	0	0	0	0	0	0	0	0	0	0	0	0	0	16	17	5	0	0	0	1	0	0	0	1	2	0	0	0	1	1	0	13	3
d__Bacteria	k__norank	p__Proteobacteria	c__Gammaproteobacteria	o__Vibrionales	f__Vibrionaceae	g__Vibrio	s__unclassified_g__Vibrio	OTU354	0	0	0	0	0	0	0	0	0	0	0	0	0	0	1	0	0	0	0	0	0	0	0	0	0	0	0	0	0	0	0	0	0	0	0	0	0	0	0	0	0
d__Bacteria	k__norank	p__Proteobacteria	c__Gammaproteobacteria	o__Pseudomonadales	f__Moraxellaceae	g__Acinetobacter	s__unclassified_g__Acinetobacter	OTU355	0	0	1	3	0	0	0	0	0	0	1	1	0	1	0	1	3	0	0	0	0	2	2	2	0	1	0	0	0	0	0	2	1	0	0	0	0	0	1	1	0
d__Bacteria	k__norank	p__Actinobacteria	c__Actinobacteria	o__Micrococcales	f__Microbacteriaceae	g__Microbacterium	s__unclassified_g__Microbacterium	OTU36	1	2	4	0	0	0	0	0	0	0	0	0	0	0	1	262	761	319	0	1	1	69	75	185	0	0	0	0	1	0	0	0	0	1	4	1	0	0	0	0	0
d__Bacteria	k__norank	p__Actinobacteria	c__Actinobacteria	o__Micrococcales	f__Microbacteriaceae	g__Curtobacterium	s__unclassified_g__Curtobacterium	OTU37	0	4	22	0	0	0	1	1	0	0	0	0	0	0	0	1219	469	490	0	1	6	28	20	33	0	1	0	9	1	1	0	0	0	0	3	3	0	0	0	2	0
d__Bacteria	k__norank	p__Actinobacteria	c__Actinobacteria	o__Corynebacteriales	f__Mycobacteriaceae	g__Mycobacterium	s__unclassified_g__Mycobacterium	OTU38	1	1	1	1	0	0	0	0	1	0	0	0	0	0	0	5	3	2	0	0	1	2	10	12	0	0	0	0	0	1	0	0	0	0	4	0	0	0	2	0	0
d__Bacteria	k__norank	p__Bacteroidetes	c__Flavobacteriia	o__Flavobacteriales	f__Flavobacteriaceae	g__Chryseobacterium	s__unclassified_g__Chryseobacterium	OTU39	1	3	16	0	1	0	0	0	0	0	0	0	0	0	0	38	323	33	0	2	2	777	293	830	0	2	0	0	0	0	0	0	0	0	0	0	0	0	0	0	0
d__Bacteria	k__norank	p__Bacteroidetes	c__Cytophagia	o__Cytophagales	f__Cytophagaceae	g__Hymenobacter	s__uncultured_bacterium_g__Hymenobacter	OTU4	1	2	6	2	0	0	0	0	0	0	0	0	0	0	0	0	0	0	0	0	0	0	0	0	0	0	0	0	0	1	0	0	0	0	0	0	0	0	0	0	0
d__Bacteria	k__norank	p__Proteobacteria	c__Deltaproteobacteria	o__Bdellovibrionales	f__Bdellovibrionaceae	g__Bdellovibrio	s__Bdellovibrio_sp._SKB1291214	OTU40	0	0	0	0	0	0	0	0	0	0	0	0	0	0	0	0	0	6	0	0	0	2	0	0	0	0	0	0	0	0	0	0	0	1	0	0	0	0	0	0	0
d__Bacteria	k__norank	p__Actinobacteria	c__Actinobacteria	o__Corynebacteriales	f__Nocardiaceae	g__Rhodococcus	s__Rhodococcus_fascians	OTU41	0	1	0	2	0	1	0	0	0	0	0	0	0	0	0	3	1	0	0	0	0	1	3	1	0	0	0	0	0	1	0	0	1	0	0	0	0	0	0	0	0
d__Bacteria	k__norank	p__Actinobacteria	c__Actinobacteria	o__Propionibacteriales	f__Nocardioidaceae	g__Nocardioides	s__unclassified_g__Nocardioides	OTU42	0	0	0	0	0	0	0	0	0	0	2	0	0	0	0	0	0	6	0	0	0	0	0	0	0	0	0	0	0	0	0	0	0	0	1	0	0	0	0	0	0
d__Bacteria	k__norank	p__Proteobacteria	c__Alphaproteobacteria	o__Rickettsiales	f__Anaplasmataceae	g__Wolbachia	s__unclassified_g__Wolbachia	OTU44	0	0	0	0	0	0	0	34	0	0	0	0	0	0	1	1	0	3	0	0	1	2	2	4	0	0	0	0	0	0	0	0	0	0	0	0	0	0	0	0	0
d__Bacteria	k__norank	p__Actinobacteria	c__Actinobacteria	o__Corynebacteriales	f__Nocardiaceae	g__Rhodococcus	s__unclassified_g__Rhodococcus	OTU45	50	9	37	36	13	9	1	2	9	4	19	19	10	2	12	41	129	25	1	4	22	71	16	36	4	7	2	11	13	10	0	8	8	1	3	18	9	12	11	124	22
d__Bacteria	k__norank	p__Proteobacteria	c__Betaproteobacteria	o__Burkholderiales	f__Comamonadaceae	g__Aquincola	s__uncultured_beta_proteobacterium_g__Aquincola	OTU46	0	0	0	0	0	0	0	0	0	0	0	0	0	0	0	0	2	0	0	0	0	0	0	0	0	0	0	0	0	0	0	0	0	0	0	0	0	0	0	0	0
d__Bacteria	k__norank	p__Proteobacteria	c__Gammaproteobacteria	o__Pseudomonadales	f__Moraxellaceae	g__Acinetobacter	s__unclassified_g__Acinetobacter	OTU47	0	0	1	0	0	0	9	0	3	0	0	0	1	0	0	155	143	335	0	0	0	3572	227	1287	0	0	0	0	0	0	0	1	0	11	19	8	0	0	0	0	0
d__Bacteria	k__norank	p__Cyanobacteria	c__Cyanobacteria	o__norank_c__Cyanobacteria	f__norank_c__Cyanobacteria	g__norank_c__Cyanobacteria	s__Oryza_sativa_Japonica_Group__Japanese_rice__g__norank	OTU48	1	0	70	40	20	1	0	4	3	0	13	14	2	0	1	9	18	3	0	3	2	3	5	0	0	4	5	15	56	8	0	1	1	1	1	1	1	119	0	1	2
d__Bacteria	k__norank	p__Cyanobacteria	c__Cyanobacteria	o__norank_c__Cyanobacteria	f__norank_c__Cyanobacteria	g__norank_c__Cyanobacteria	s__Cunninghamia_lanceolata_var._konishii	OTU49	2	0	1	0	0	0	0	0	0	0	0	0	0	0	3	0	2	0	0	0	0	0	0	0	0	0	0	0	0	0	0	0	2	0	0	0	0	0	0	1	0
d__Bacteria	k__norank	p__Proteobacteria	c__Alphaproteobacteria	o__Rickettsiales	f__Rickettsiales_Incertae_Sedis	g__norank_f__Rickettsiales_Incertae_Sedis	s__unclassified_g__norank_f__Rickettsiales_Incertae_Sedis	OTU5	0	4	0	0	0	0	0	0	0	0	0	0	0	0	0	0	0	0	0	0	0	0	0	0	0	0	0	0	0	0	0	0	0	0	0	0	0	0	0	0	0
d__Bacteria	k__norank	p__Actinobacteria	c__Actinobacteria	o__Corynebacteriales	f__Nocardiaceae	g__Rhodococcus	s__Rhodococcus_corynebacterioides	OTU50	0	0	0	0	0	0	0	0	0	0	0	0	0	0	0	1	9	0	0	0	0	0	0	0	0	0	0	0	0	1	0	0	0	0	0	0	0	0	0	0	0
d__Bacteria	k__norank	p__Actinobacteria	c__Actinobacteria	o__Micrococcales	f__Dermacoccaceae	g__Luteipulveratus	s__Luteipulveratus_sp._C296001	OTU51	0	0	0	0	0	0	0	0	0	0	0	0	0	0	0	4	8	0	0	0	0	0	0	0	0	0	0	0	0	0	0	1	0	0	0	0	0	0	0	0	0
d__Bacteria	k__norank	p__Proteobacteria	c__Alphaproteobacteria	o__Rhodobacterales	f__Rhodobacteraceae	g__Paracoccus	s__unclassified_g__Paracoccus	OTU52	0	0	0	0	0	0	0	0	0	0	2	0	0	0	2	1	39	0	0	0	0	0	1	1	0	0	1	1	0	1	0	0	0	2	2	2	0	0	0	1	0
d__Bacteria	k__norank	p__Proteobacteria	c__Gammaproteobacteria	o__Xanthomonadales	f__Xanthomonadaceae	g__Dyella	s__unclassified_g__Dyella	OTU53	0	0	0	0	0	0	0	0	0	0	0	0	0	0	0	10	39	4	0	0	0	0	1	0	0	0	0	0	0	0	0	0	0	0	0	2	0	0	0	0	0
d__Bacteria	k__norank	p__Actinobacteria	c__Actinobacteria	o__Corynebacteriales	f__Nocardiaceae	g__Gordonia	s__Gordonia_polyisoprenivorans	OTU54	1	0	1	0	0	0	0	0	0	0	0	0	0	0	1	1	14	1	0	0	0	0	0	0	0	0	0	0	0	0	0	0	0	2	2	2	0	0	0	0	0
d__Bacteria	k__norank	p__Proteobacteria	c__Alphaproteobacteria	o__Rhodospirillales	f__Acetobacteraceae	g__Gluconacetobacter	s__Gluconacetobacter_sacchari	OTU55	0	0	0	0	0	0	0	0	0	0	0	0	0	0	0	4	0	4	0	0	0	0	0	0	0	0	0	0	0	0	0	0	0	0	0	0	0	0	0	0	0
d__Bacteria	k__norank	p__Proteobacteria	c__Gammaproteobacteria	o__Enterobacteriales	f__Enterobacteriaceae	g__Pantoea	s__unclassified_g__Pantoea	OTU56	0	0	0	0	0	0	0	0	0	0	0	0	0	0	0	0	4	4	0	0	0	1	3	0	0	0	0	0	0	0	0	1	0	1	0	0	0	0	0	0	0
d__Bacteria	k__norank	p__Proteobacteria	c__Alphaproteobacteria	o__Rhodospirillales	f__Acetobacteraceae	g__Asaia	s__proteobacterium_symbiont_of_Nilaparvata_lugens_g__Asaia	OTU57	2	2	0	0	0	0	0	0	0	26017	2	0	1	5	12	0	1	0	0	0	0	62	20	194	0	0	0	1	0	0	24643	33	74	0	7	0	5	7	14	4	0
d__Bacteria	k__norank	p__Proteobacteria	c__Gammaproteobacteria	o__unclassified_c__Gammaproteobacteria	f__unclassified_c__Gammaproteobacteria	g__unclassified_c__Gammaproteobacteria	s__unclassified_c__Gammaproteobacteria	OTU59	0	0	0	0	0	0	183	70	73	0	1	0	0	0	0	0	0	0	0	0	0	0	0	1	0	0	0	0	0	0	3	3	2	0	0	1	133	2	3	9	0
d__Bacteria	k__norank	p__Proteobacteria	c__Betaproteobacteria	o__Burkholderiales	f__Oxalobacteraceae	g__Herbaspirillum	s__Herbaspirillum_huttiense_subsp._putei	OTU6	0	9513	2	0	0	0	0	0	0	0	0	0	0	0	0	0	4	0	0	0	0	4365	7	33	0	0	0	0	0	0	0	0	0	0	0	0	0	0	0	0	0
d__Bacteria	k__norank	p__Firmicutes	c__Bacilli	o__Bacillales	f__Bacillaceae	g__Bacillus	s__Bacillus_marisflavi_g__Bacillus	OTU60	0	0	0	0	0	0	0	0	0	0	2	0	0	0	0	0	0	0	6	10	21	0	0	0	0	0	0	0	0	0	0	0	0	0	0	0	0	0	0	0	0
d__Bacteria	k__norank	p__Proteobacteria	c__Alphaproteobacteria	o__Rhodobacterales	f__Rhodobacteraceae	g__Paracoccus	s__unclassified_g__Paracoccus	OTU61	0	0	0	0	0	0	1	0	0	0	0	0	0	0	0	0	0	0	0	0	0	0	0	0	0	0	0	0	1	0	0	0	0	0	1	1	0	0	0	2	0
d__Bacteria	k__norank	p__Actinobacteria	c__Actinobacteria	o__Micrococcales	f__Dermabacteraceae	g__Brachybacterium	s__Brachybacterium_paraconglomeratum	OTU62	0	0	0	0	0	0	0	0	0	0	1	0	0	1	1	11	2	0	0	0	3	1	0	0	0	0	0	0	0	0	0	0	0	3	12	10	0	0	0	3	0
d__Bacteria	k__norank	p__Proteobacteria	c__Alphaproteobacteria	o__Rhizobiales	f__Rhizobiaceae	g__Kaistia	s__uncultured_bacterium_g__Kaistia	OTU63	0	0	0	0	0	0	0	0	0	0	0	0	0	0	0	0	0	0	0	0	1	0	0	0	0	0	0	0	0	0	0	0	0	0	0	0	0	0	0	0	0
d__Bacteria	k__norank	p__Chloroflexi	c__Anaerolineae	o__Anaerolineales	f__Anaerolineaceae	g__norank_f__Anaerolineaceae	s__anaerobic_bacterium_MO-CFX2	OTU64	0	0	0	0	0	0	0	0	0	0	0	0	0	0	0	0	0	0	0	0	0	0	0	0	0	0	0	0	0	0	0	0	0	0	0	0	0	0	0	0	0
d__Bacteria	k__norank	p__Chloroflexi	c__Anaerolineae	o__Anaerolineales	f__Anaerolineaceae	g__norank_f__Anaerolineaceae	s__anaerobic_digester_metagenome_g__norank_f__Anaerolineaceae	OTU65	0	0	0	0	0	0	0	0	0	0	0	0	0	0	0	0	0	0	0	0	0	0	0	0	0	0	0	0	0	0	0	0	0	0	0	0	0	0	0	0	0
d__Bacteria	k__norank	p__Tenericutes	c__Mollicutes	o__Entomoplasmatales	f__Spiroplasmataceae	g__Spiroplasma	s__unclassified_g__Spiroplasma	OTU66	1008	955	823	0	0	0	1964	177	4542	533	361	2413	0	55	281	1	1	1	0	0	0	0	236	0	1113	0	0	1938	482	153	0	10533	12892	2431	4423	0	2	1240	1595	1	0
d__Bacteria	k__norank	p__Proteobacteria	c__Gammaproteobacteria	o__Enterobacteriales	f__Enterobacteriaceae	g__Arsenophonus	s__unclassified_g__Arsenophonus	OTU67	0	0	0	0	0	0	0	0	0	0	0	0	2	0	0	0	0	0	0	0	0	0	0	0	0	0	0	5	0	0	0	0	0	0	0	0	0	0	0	4	0
d__Bacteria	k__norank	p__Deinococcus-Thermus	c__Deinococci	o__Thermales	f__Thermaceae	g__Thermus	s__Thermus_scotoductus	OTU68	1	0	137	23	6	4	0	0	0	0	0	1	0	0	0	7	2	0	0	0	0	25	4	3	0	0	0	0	0	0	0	2	0	0	0	0	5	2	8	8	4
d__Bacteria	k__norank	p__Proteobacteria	c__Alphaproteobacteria	o__Rhodospirillales	f__Acetobacteraceae	g__Asaia	s__proteobacterium_symbiont_of_Nilaparvata_lugens_g__Asaia	OTU69	0	0	0	0	0	0	0	0	0	186	0	0	0	0	1	0	0	0	0	0	0	1	0	6	0	0	0	0	0	0	280	1	2	0	0	1	0	0	0	0	0
d__Bacteria	k__norank	p__Cyanobacteria	c__Cyanobacteria	o__norank_c__Cyanobacteria	f__norank_c__Cyanobacteria	g__norank_c__Cyanobacteria	s__uncultured_diatom	OTU7	2	0	18	0	0	0	0	0	0	0	0	0	0	0	0	0	0	0	0	0	0	0	0	0	0	1	1	0	0	0	0	0	0	0	0	0	0	0	0	0	0
d__Bacteria	k__norank	p__Bacteroidetes	c__Flavobacteriia	o__Flavobacteriales	f__Flavobacteriaceae	g__Chryseobacterium	s__unclassified_g__Chryseobacterium	OTU70	3	0	1	1	0	0	0	0	1	0	0	0	0	1	0	2	3	0	0	0	1	46	32	214	23	64	233	0	0	0	0	2	4	5	13	15	0	1	0	1	0
d__Bacteria	k__norank	p__Proteobacteria	c__Betaproteobacteria	o__Burkholderiales	f__Comamonadaceae	g__Diaphorobacter	s__uncultured_bacterium_g__Diaphorobacter	OTU71	0	0	0	0	0	0	0	0	0	0	0	0	0	0	0	0	1	0	0	0	0	0	0	0	0	0	0	0	0	0	0	0	0	2	1	0	0	0	0	0	0
d__Bacteria	k__norank	p__Proteobacteria	c__Gammaproteobacteria	o__Pseudomonadales	f__Moraxellaceae	g__Perlucidibaca	s__unclassified_g__Perlucidibaca	OTU72	0	0	0	0	0	0	0	0	0	0	1	0	0	0	0	0	0	0	0	0	0	0	0	0	0	0	0	0	0	0	0	0	0	1	0	0	0	0	0	0	0
d__Bacteria	k__norank	p__Bacteroidetes	c__Flavobacteriia	o__Flavobacteriales	f__Flavobacteriaceae	g__Flavobacterium	s__Flavobacterium_lindanitolerans	OTU73	1	0	0	0	0	0	0	0	0	0	0	0	0	0	0	0	0	0	0	0	0	1	10	33	0	0	0	0	0	0	0	0	0	0	0	0	0	0	0	0	0
d__Bacteria	k__norank	p__Actinobacteria	c__Actinobacteria	o__Micrococcales	f__Dermabacteraceae	g__Dermabacter	s__uncultured_bacterium_g__Dermabacter	OTU74	0	0	0	0	0	0	0	0	0	0	0	0	0	0	0	0	1	0	0	0	0	0	0	0	0	0	0	0	0	0	0	0	0	0	0	0	0	1	0	5	1
d__Bacteria	k__norank	p__Proteobacteria	c__Alphaproteobacteria	o__Rickettsiales	f__Anaplasmataceae	g__Wolbachia	s__unclassified_g__Wolbachia	OTU75	0	0	0	0	0	0	0	0	0	265	0	0	0	0	0	0	0	0	0	0	0	1	0	3	0	0	0	0	0	0	336	1	4	0	1	1	0	1	0	0	1
d__Bacteria	k__norank	p__Cyanobacteria	c__Cyanobacteria	o__Obscuribacterales	f__norank_o__Obscuribacterales	g__norank_o__Obscuribacterales	s__uncultured_bacterium_g__norank_o__Obscuribacterales	OTU76	0	0	0	0	0	0	0	0	0	0	0	0	0	0	0	0	0	0	0	0	0	0	0	0	0	0	0	0	0	0	0	0	0	0	2	0	0	0	0	0	0
d__Bacteria	k__norank	p__Proteobacteria	c__Alphaproteobacteria	o__Caulobacterales	f__Caulobacteraceae	g__Brevundimonas	s__unclassified_g__Brevundimonas	OTU77	0	0	0	0	1	0	0	0	0	0	0	0	0	0	0	0	0	0	0	0	0	2	0	0	0	0	0	0	0	0	0	0	1	0	2	1	0	0	0	0	0
d__Bacteria	k__norank	p__Proteobacteria	c__Betaproteobacteria	o__Burkholderiales	f__Comamonadaceae	g__Aquabacterium	s__Aquabacterium_citratiphilum	OTU79	0	0	3	0	0	0	0	0	0	0	0	0	0	0	0	0	0	0	0	0	0	0	0	2	0	0	0	0	0	0	0	0	0	0	3	1	0	0	0	0	0
d__Bacteria	k__norank	p__Actinobacteria	c__Actinobacteria	o__Kineosporiales	f__Kineosporiaceae	g__Kineococcus	s__unclassified_g__Kineococcus	OTU8	0	1	40	4	0	0	0	0	0	0	0	0	0	0	0	0	0	0	0	0	1	0	0	0	0	0	0	0	0	0	0	0	0	0	0	0	1	0	0	0	1
d__Bacteria	k__norank	p__Proteobacteria	c__Betaproteobacteria	o__Burkholderiales	f__Burkholderiaceae	g__Burkholderia-Paraburkholderia	s__unclassified_g__Burkholderia-Paraburkholderia	OTU80	0	0	0	0	1	0	0	1	0	0	0	0	0	0	0	0	5	3	0	0	0	38	40	159	0	3	1	0	0	0	0	0	0	1	1	1	0	0	0	1	0
d__Bacteria	k__norank	p__Saccharibacteria	c__norank_p__Saccharibacteria	o__norank_p__Saccharibacteria	f__norank_p__Saccharibacteria	g__norank_p__Saccharibacteria	s__uncultured_soil_bacterium_g__norank_p__Saccharibacteria	OTU81	0	0	1	0	0	0	0	0	0	0	0	0	0	0	0	0	0	0	0	0	0	0	0	0	0	0	0	0	0	0	0	0	0	0	0	4	0	0	0	0	0
d__Bacteria	k__norank	p__Actinobacteria	c__Actinobacteria	o__Propionibacteriales	f__Nocardioidaceae	g__Nocardioides	s__unclassified_g__Nocardioides	OTU85	0	0	0	1	0	0	0	0	0	0	0	0	0	0	0	0	0	0	0	0	0	0	0	0	0	0	0	0	0	0	0	0	0	0	0	0	0	0	0	0	0
d__Bacteria	k__norank	p__Proteobacteria	c__Betaproteobacteria	o__Burkholderiales	f__Oxalobacteraceae	g__Duganella	s__unclassified_g__Duganella	OTU86	0	0	0	2	0	0	0	0	0	0	0	0	0	0	0	0	0	0	0	0	0	0	0	1	0	0	0	0	0	0	0	0	0	0	0	0	0	0	0	0	0
d__Bacteria	k__norank	p__Proteobacteria	c__Gammaproteobacteria	o__Pseudomonadales	f__Pseudomonadaceae	g__Pseudomonas	s__Pseudomonas_otitidis	OTU87	0	0	0	0	0	0	0	1	0	0	0	0	0	0	0	0	0	0	0	0	0	0	0	7	1	0	0	0	0	0	0	0	0	0	15	1	0	0	0	0	0
d__Bacteria	k__norank	p__Proteobacteria	c__Betaproteobacteria	o__Burkholderiales	f__Alcaligenaceae	g__Achromobacter	s__unclassified_g__Achromobacter	OTU88	3	3	0	1	1	0	2	0	0	1	0	1	0	0	0	0	1	1	0	0	0	23	6	26	0	0	0	0	0	0	1	0	0	0	1	2	1	0	0	4	0
d__Bacteria	k__norank	p__Proteobacteria	c__Alphaproteobacteria	o__Rhizobiales	f__Xanthobacteraceae	g__Azorhizobium	s__Azorhizobium_caulinodans	OTU89	0	0	0	0	0	0	0	0	0	0	0	0	0	0	0	0	0	0	0	0	0	0	0	0	0	0	0	0	0	0	0	0	0	0	0	2	0	0	0	0	0
d__Bacteria	k__norank	p__Bacteroidetes	c__Cytophagia	o__Cytophagales	f__Cytophagaceae	g__Spirosoma	s__Spirosoma_sp._NBRC_101364	OTU9	0	1	8	0	0	0	0	0	0	0	0	0	0	0	0	0	0	0	0	0	1	0	0	0	0	0	0	0	0	0	0	0	0	0	0	0	0	0	0	0	0
d__Bacteria	k__norank	p__Bacteroidetes	c__Sphingobacteriia	o__Sphingobacteriales	f__norank_o__Sphingobacteriales	g__norank_o__Sphingobacteriales	s__unclassified_g__norank_o__Sphingobacteriales	OTU91	0	0	0	0	0	0	0	0	0	0	0	0	0	0	0	0	0	0	0	0	0	0	0	0	0	0	0	0	0	0	0	0	0	0	0	1	0	0	0	0	0
d__Bacteria	k__norank	p__Proteobacteria	c__Betaproteobacteria	o__Burkholderiales	f__Comamonadaceae	g__unclassified_f__Comamonadaceae	s__unclassified_f__Comamonadaceae	OTU93	1	1	5	1	0	0	0	0	0	0	0	0	0	0	0	0	0	0	0	0	0	2	0	1	0	0	0	0	0	0	0	0	0	1	2	1	0	0	0	0	0
d__Bacteria	k__norank	p__Bacteroidetes	c__Sphingobacteriia	o__Sphingobacteriales	f__Chitinophagaceae	g__Taibaiella	s__unclassified_g__Taibaiella	OTU94	0	0	0	0	0	0	0	0	0	0	0	0	0	0	0	0	0	0	0	0	0	0	0	0	0	0	0	0	0	0	0	0	0	0	1	0	0	0	0	0	0
d__Bacteria	k__norank	p__Bacteroidetes	c__Sphingobacteriia	o__Sphingobacteriales	f__Chitinophagaceae	g__Taibaiella	s__unclassified_g__Taibaiella	OTU95	0	0	0	0	0	0	0	0	0	0	0	0	0	0	0	0	0	0	0	0	0	0	0	0	0	0	0	0	0	0	0	0	0	1	1	0	0	0	0	0	0
d__Bacteria	k__norank	p__Proteobacteria	c__Alphaproteobacteria	o__Rhodospirillales	f__Rhodospirillaceae	g__Niveispirillum	s__uncultured_bacterium_g__Niveispirillum	OTU96	0	0	0	0	0	0	0	0	0	0	0	0	0	0	0	0	0	0	0	0	0	0	1	0	0	0	0	0	0	0	0	0	0	0	0	1	0	0	0	0	0
d__Bacteria	k__norank	p__Firmicutes	c__Bacilli	o__Bacillales	f__Staphylococcaceae	g__Staphylococcus	s__unclassified_g__Staphylococcus	OTU97	0	0	0	0	0	0	2	56	5	0	31	0	0	0	0	11	6	0	0	0	0	0	0	0	0	0	0	0	1	0	0	0	0	31	95	80	0	0	0	1	0
d__Bacteria	k__norank	p__Bacteroidetes	c__Sphingobacteriia	o__Sphingobacteriales	f__Chitinophagaceae	g__Chitinophaga	s__unclassified_g__Chitinophaga	OTU98	0	0	1	0	0	0	0	0	0	0	0	0	0	0	0	0	0	0	0	0	0	0	0	0	0	0	0	0	0	0	0	0	0	0	0	0	0	0	0	0	0
d__Bacteria	k__norank	p__Proteobacteria	c__Alphaproteobacteria	o__Rhizobiales	f__Bradyrhizobiaceae	g__Rhodopseudomonas	s__uncultured_bacterium_g__Rhodopseudomonas	OTU99	0	0	1	0	0	0	0	0	0	0	0	0	0	0	0	1	0	0	0	0	0	0	0	0	0	0	0	0	0	0	0	0	0	0	0	0	0	0	0	0	0
[truncated: 8 more columns]

## Sheet: Table S8
Table S8 The abundance of OTUs between the Wolbachia-infected and Wolbachia-free females in SAP populations.
Domain	Kingdom	Phylum	Class	Order	Family	Genus	Species	OTU	w+1	w+2	w+3	w+4	w+5	w+6	w+7	w+8	w+9	w+10	w-1	w-2	w-3	w-4	w-5	w-6	w-7	w-8	w-9
d__Bacteria	k__norank_d__Bacteria	p__Proteobacteria	c__Alphaproteobacteria	o__Acetobacterales	f__Acetobacteraceae	g__Acetobacter	s__Acetobacter_fabarum	OTU1	1	0	1	0	1	2	0	0	0	0	0	0	0	0	0	0	0	0	0
d__Bacteria	k__norank_d__Bacteria	p__unclassified_k__norank_d__Bacteria	c__unclassified_k__norank_d__Bacteria	o__unclassified_k__norank_d__Bacteria	f__unclassified_k__norank_d__Bacteria	g__unclassified_k__norank_d__Bacteria	s__unclassified_k__norank_d__Bacteria	OTU10	0	0	0	0	0	2	0	0	0	0	0	0	0	0	0	0	0	0	0
d__Bacteria	k__norank_d__Bacteria	p__Bacteroidetes	c__Bacteroidia	o__Bacteroidales	f__Porphyromonadaceae	g__Porphyromonas	s__Porphyromonas_bennonis	OTU100	0	0	0	0	0	0	0	0	0	0	1	0	0	0	0	0	0	0	0
d__Bacteria	k__norank_d__Bacteria	p__Proteobacteria	c__Alphaproteobacteria	o__Alphaproteobacteria_Incertae_Sedis	f__unclassified_o__Alphaproteobacteria_Incertae_Sedis	g__Meganema	s__Meganema_perideroedes	OTU1000	0	38	0	0	0	0	0	0	0	0	0	0	0	0	0	0	0	0	0
d__Bacteria	k__norank_d__Bacteria	p__Patescibacteria	c__Gracilibacteria	o__JGI_0000069-P22	f__norank_o__JGI_0000069-P22	g__norank_o__JGI_0000069-P22	s__uncultured_bacterium_g__norank_o__JGI_0000069-P22	OTU1001	0	2	0	0	0	0	0	0	0	0	0	0	0	0	0	0	0	0	0
d__Bacteria	k__norank_d__Bacteria	p__Proteobacteria	c__Alphaproteobacteria	o__Rhodobacterales	f__Rhodobacteraceae	g__unclassified_f__Rhodobacteraceae	s__unclassified_f__Rhodobacteraceae	OTU1002	0	55	0	0	0	0	0	0	0	0	0	0	0	0	0	0	0	0	0
d__Bacteria	k__norank_d__Bacteria	p__Epsilonbacteraeota	c__Campylobacteria	o__Campylobacterales	f__Arcobacteraceae	g__Arcobacter	s__Arcobacter_cryaerophilus	OTU1003	0	4	0	0	0	0	0	0	0	0	0	0	0	0	0	0	0	0	0
d__Bacteria	k__norank_d__Bacteria	p__Proteobacteria	c__Alphaproteobacteria	o__Caulobacterales	f__Hyphomonadaceae	g__SWB02	s__uncultured_bacterium_g__SWB02	OTU1004	0	2	0	0	1	0	0	0	0	0	0	3	0	0	0	0	0	0	0
d__Bacteria	k__norank_d__Bacteria	p__Proteobacteria	c__Gammaproteobacteria	o__Betaproteobacteriales	f__Nitrosomonadaceae	g__Nitrosomonas	s__Nitrosomonas_europaea	OTU1005	0	117	0	0	0	0	0	0	0	0	0	0	0	0	0	0	0	0	0
d__Bacteria	k__norank_d__Bacteria	p__Proteobacteria	c__Alphaproteobacteria	o__Caulobacterales	f__Caulobacteraceae	g__Brevundimonas	s__Brevundimonas_vesicularis	OTU1006	7	5	0	2	1	1	2	2	2	0	13	8	0	0	0	0	0	0	0
d__Bacteria	k__norank_d__Bacteria	p__Acidobacteria	c__Acidobacteriia	o__Solibacterales	f__Solibacteraceae_Subgroup_3	g__Bryobacter	s__uncultured_soil_bacterium_g__Bryobacter	OTU1007	0	2	0	0	0	0	0	0	0	0	0	0	0	0	0	0	0	0	0
d__Bacteria	k__norank_d__Bacteria	p__Proteobacteria	c__Deltaproteobacteria	o__Myxococcales	f__Nannocystaceae	g__Nannocystis	s__metagenome_g__Nannocystis	OTU1008	0	2	0	0	0	0	0	0	0	0	0	0	0	0	0	0	0	0	0
d__Bacteria	k__norank_d__Bacteria	p__Proteobacteria	c__Deltaproteobacteria	o__Bdellovibrionales	f__Bdellovibrionaceae	g__Bdellovibrio	s__unclassified_g__Bdellovibrio	OTU1009	0	31	0	0	0	0	0	0	0	0	0	0	0	0	0	0	0	0	0
d__Bacteria	k__norank_d__Bacteria	p__unclassified_k__norank_d__Bacteria	c__unclassified_k__norank_d__Bacteria	o__unclassified_k__norank_d__Bacteria	f__unclassified_k__norank_d__Bacteria	g__unclassified_k__norank_d__Bacteria	s__unclassified_k__norank_d__Bacteria	OTU101	0	0	0	0	0	0	0	0	0	0	1	0	0	0	0	0	0	0	0
d__Bacteria	k__norank_d__Bacteria	p__Bacteroidetes	c__Bacteroidia	o__Bacteroidales	f__Rikenellaceae	g__unclassified_f__Rikenellaceae	s__unclassified_f__Rikenellaceae	OTU1010	0	1	0	0	0	0	0	0	0	0	0	0	0	0	0	0	0	0	0
d__Bacteria	k__norank_d__Bacteria	p__Planctomycetes	c__OM190	o__norank_c__OM190	f__norank_c__OM190	g__norank_c__OM190	s__metagenome_g__norank_c__OM190	OTU1011	0	3	0	0	0	0	0	0	0	0	0	0	0	0	0	0	0	0	0
d__Bacteria	k__norank_d__Bacteria	p__Acidobacteria	c__Blastocatellia_Subgroup_4	o__Blastocatellales	f__Blastocatellaceae	g__JGI_0001001-H03	s__unclassified_g__JGI_0001001-H03	OTU1012	2	8	0	0	0	0	0	0	0	0	0	0	0	0	0	0	0	0	0
d__Bacteria	k__norank_d__Bacteria	p__Chloroflexi	c__Anaerolineae	o__RBG-13-54-9	f__norank_o__RBG-13-54-9	g__norank_o__RBG-13-54-9	s__uncultured_soil_bacterium_g__norank_o__RBG-13-54-9	OTU1013	0	4	0	0	0	0	0	0	0	0	0	0	0	0	0	0	0	0	0
d__Bacteria	k__norank_d__Bacteria	p__Acidobacteria	c__Blastocatellia_Subgroup_4	o__Blastocatellales	f__Blastocatellaceae	g__norank_f__Blastocatellaceae	s__unclassified_g__norank_f__Blastocatellaceae	OTU1014	0	10	0	0	0	0	0	0	0	0	0	0	0	0	0	0	0	0	0
d__Bacteria	k__norank_d__Bacteria	p__Proteobacteria	c__Deltaproteobacteria	o__Bdellovibrionales	f__Bacteriovoracaceae	g__Peredibacter	s__unclassified_g__Peredibacter	OTU1015	0	20	0	0	0	0	0	0	0	0	0	0	0	0	0	0	0	0	0
d__Bacteria	k__norank_d__Bacteria	p__Bacteroidetes	c__Bacteroidia	o__Bacteroidales	f__Porphyromonadaceae	g__Porphyromonas	s__uncultured_bacterium_g__Porphyromonas	OTU1016	0	2	0	0	0	0	0	0	0	0	0	0	0	0	0	0	0	0	0
d__Bacteria	k__norank_d__Bacteria	p__Actinobacteria	c__Actinobacteria	o__Microtrichales	f__Ilumatobacteraceae	g__CL500-29_marine_group	s__metagenome_g__CL500-29_marine_group	OTU1017	0	9	0	0	0	0	0	0	0	0	0	0	0	0	0	0	0	0	0
d__Bacteria	k__norank_d__Bacteria	p__Proteobacteria	c__Gammaproteobacteria	o__Betaproteobacteriales	f__Hydrogenophilaceae	g__Thiobacillus	s__unclassified_g__Thiobacillus	OTU1018	0	3	0	1	0	0	0	0	0	0	0	0	0	0	0	0	0	0	0
d__Bacteria	k__norank_d__Bacteria	p__Bacteroidetes	c__Bacteroidia	o__Chitinophagales	f__Chitinophagaceae	g__Ferruginibacter	s__uncultured_bacterium_g__Ferruginibacter	OTU1019	0	3	0	0	0	0	0	0	0	0	0	0	0	0	0	0	0	0	0
d__Bacteria	k__norank_d__Bacteria	p__Proteobacteria	c__Alphaproteobacteria	o__Rhizobiales	f__Rhizobiaceae	g__Ochrobactrum	s__Ochrobactrum_pseudogrignonense_g__Ochrobactrum	OTU102	1	1	0	0	0	0	3	2	0	0	127	8	0	0	0	0	0	0	0
d__Bacteria	k__norank_d__Bacteria	p__Proteobacteria	c__Alphaproteobacteria	o__Rhodobacterales	f__Rhodobacteraceae	g__Rhodobacter	s__unclassified_g__Rhodobacter	OTU1020	1	25	0	0	0	1	0	0	0	0	0	1	0	0	0	0	0	0	0
d__Bacteria	k__norank_d__Bacteria	p__Planctomycetes	c__Phycisphaerae	o__Phycisphaerales	f__Phycisphaeraceae	g__SM1A02	s__metagenome_g__SM1A02	OTU1021	0	7	0	0	0	0	0	0	0	0	0	0	0	0	0	0	0	0	0
d__Bacteria	k__norank_d__Bacteria	p__Proteobacteria	c__Deltaproteobacteria	o__Bdellovibrionales	f__Bacteriovoracaceae	g__Bacteriovorax	s__uncultured_bacterium_g__Bacteriovorax	OTU1022	0	7	0	0	1	0	0	0	0	0	0	0	0	0	0	0	0	0	0
d__Bacteria	k__norank_d__Bacteria	p__Proteobacteria	c__Gammaproteobacteria	o__Betaproteobacteriales	f__SC-I-84	g__norank_f__SC-I-84	s__uncultured_bacterium_g__norank_f__SC-I-84	OTU1023	0	18	0	0	0	0	0	0	0	0	0	0	0	0	0	0	0	0	0
d__Bacteria	k__norank_d__Bacteria	p__Verrucomicrobia	c__Verrucomicrobiae	o__Verrucomicrobiales	f__Verrucomicrobiaceae	g__Brevifollis	s__uncultured_bacterium_g__Brevifollis	OTU1024	0	3	0	0	0	0	0	0	0	0	0	0	0	0	0	0	0	0	0
d__Bacteria	k__norank_d__Bacteria	p__Planctomycetes	c__Planctomycetacia	o__Isosphaerales	f__Isosphaeraceae	g__Paludisphaera	s__uncultured_bacterium_g__Paludisphaera	OTU1026	0	20	0	0	0	0	0	0	0	0	0	0	0	0	0	0	0	0	0
d__Bacteria	k__norank_d__Bacteria	p__Proteobacteria	c__Alphaproteobacteria	o__Rhizobiales	f__Devosiaceae	g__Devosia	s__metagenome_g__Devosia	OTU1027	0	36	0	0	0	0	0	0	0	0	0	3	0	0	0	0	0	0	0
d__Bacteria	k__norank_d__Bacteria	p__Proteobacteria	c__Gammaproteobacteria	o__JG36-GS-52	f__norank_o__JG36-GS-52	g__norank_o__JG36-GS-52	s__uncultured_gamma_proteobacterium_g__norank_o__JG36-GS-52	OTU1028	0	7	0	0	0	0	0	0	0	0	0	2	0	0	0	0	0	0	0
d__Bacteria	k__norank_d__Bacteria	p__Planctomycetes	c__Planctomycetacia	o__Isosphaerales	f__Isosphaeraceae	g__Singulisphaera	s__unclassified_g__Singulisphaera	OTU1029	0	2	0	0	0	0	0	0	0	0	0	0	0	0	0	0	0	0	0
d__Bacteria	k__norank_d__Bacteria	p__Actinobacteria	c__Actinobacteria	o__Gaiellales	f__norank_o__Gaiellales	g__norank_o__Gaiellales	s__uncultured_bacterium_g__norank_o__Gaiellales	OTU103	1	1	0	0	0	0	0	0	0	0	2	0	0	0	0	0	0	0	0
d__Bacteria	k__norank_d__Bacteria	p__Proteobacteria	c__Gammaproteobacteria	o__Xanthomonadales	f__Xanthomonadaceae	g__Arenimonas	s__bacterium_CYCU-0215	OTU1030	0	8	0	0	0	0	0	0	0	0	0	0	0	0	0	0	0	0	0
d__Bacteria	k__norank_d__Bacteria	p__Spirochaetes	c__Spirochaetia	o__Spirochaetales	f__Spirochaetaceae	g__norank_f__Spirochaetaceae	s__unclassified_g__norank_f__Spirochaetaceae	OTU1031	0	1	0	0	0	0	0	0	0	0	0	0	0	0	0	0	0	0	0
d__Bacteria	k__norank_d__Bacteria	p__Deinococcus-Thermus	c__Deinococci	o__Deinococcales	f__Deinococcaceae	g__Deinococcus	s__unclassified_g__Deinococcus	OTU1032	0	2	0	0	0	0	0	0	0	0	0	0	0	0	0	0	0	0	0
d__Bacteria	k__norank_d__Bacteria	p__Bacteroidetes	c__Bacteroidia	o__Sphingobacteriales	f__Lentimicrobiaceae	g__norank_f__Lentimicrobiaceae	s__wastewater_metagenome_g__norank_f__Lentimicrobiaceae	OTU1033	0	2	0	0	0	0	0	0	0	0	0	0	0	0	0	0	0	0	0
d__Bacteria	k__norank_d__Bacteria	p__Bacteroidetes	c__Ignavibacteria	o__OPB56	f__norank_o__OPB56	g__norank_o__OPB56	s__uncultured_Chlorobiales_bacterium_g__norank_o__OPB56	OTU1034	0	2	0	0	0	0	0	0	0	0	0	0	0	0	0	0	0	0	0
d__Bacteria	k__norank_d__Bacteria	p__Verrucomicrobia	c__Verrucomicrobiae	o__Verrucomicrobiales	f__Verrucomicrobiaceae	g__norank_f__Verrucomicrobiaceae	s__metagenome_g__norank_f__Verrucomicrobiaceae	OTU1035	0	2	0	0	0	0	0	0	0	0	0	0	0	0	0	0	0	0	0
d__Bacteria	k__norank_d__Bacteria	p__Proteobacteria	c__Gammaproteobacteria	o__Betaproteobacteriales	f__Burkholderiaceae	g__Leptothrix	s__metagenome_g__Leptothrix	OTU1036	0	20	0	0	0	0	0	0	0	0	0	0	0	0	0	0	0	0	0
d__Bacteria	k__norank_d__Bacteria	p__Proteobacteria	c__Deltaproteobacteria	o__Bdellovibrionales	f__Bdellovibrionaceae	g__OM27_clade	s__metagenome_g__OM27_clade	OTU1037	0	9	0	0	0	0	0	0	0	0	0	0	0	0	0	0	0	0	0
d__Bacteria	k__norank_d__Bacteria	p__Chloroflexi	c__Anaerolineae	o__SBR1031	f__norank_o__SBR1031	g__norank_o__SBR1031	s__unclassified_g__norank_o__SBR1031	OTU1038	0	2	0	0	0	0	0	0	0	0	0	0	0	0	0	0	0	0	0
d__Bacteria	k__norank_d__Bacteria	p__Chloroflexi	c__Chloroflexia	o__Thermomicrobiales	f__JG30-KF-CM45	g__norank_f__JG30-KF-CM45	s__uncultured_bacterium_g__norank_f__JG30-KF-CM45	OTU1039	0	2	0	0	0	0	0	0	0	0	0	0	0	0	0	0	0	0	0
d__Bacteria	k__norank_d__Bacteria	p__Actinobacteria	c__Actinobacteria	o__Micrococcales	f__Promicromonosporaceae	g__Isoptericola	s__unclassified_g__Isoptericola	OTU104	0	0	0	0	0	0	0	0	0	0	2	0	0	0	0	0	0	0	0
d__Bacteria	k__norank_d__Bacteria	p__Proteobacteria	c__Gammaproteobacteria	o__Betaproteobacteriales	f__Nitrosomonadaceae	g__Ellin6067	s__unclassified_g__Ellin6067	OTU1040	0	1	0	0	0	0	0	0	0	0	0	0	0	0	0	0	0	0	0
d__Bacteria	k__norank_d__Bacteria	p__Gemmatimonadetes	c__Gemmatimonadetes	o__Gemmatimonadales	f__Gemmatimonadaceae	g__norank_f__Gemmatimonadaceae	s__Gemmatimonadetes_bacterium_SCN_70-22	OTU1041	0	3	0	0	0	0	0	0	0	0	0	0	0	0	0	0	0	0	0
d__Bacteria	k__norank_d__Bacteria	p__Chloroflexi	c__Anaerolineae	o__SBR1031	f__A4b	g__norank_f__A4b	s__unclassified_g__norank_f__A4b	OTU1042	0	3	0	0	0	0	0	0	0	0	0	0	0	0	0	0	0	0	0
d__Bacteria	k__norank_d__Bacteria	p__Actinobacteria	c__Actinobacteria	o__Corynebacteriales	f__Corynebacteriaceae	g__Lawsonella	s__uncultured_bacterium_g__Lawsonella	OTU1043	1	4	0	2	0	1	1	1	1	1	1	6	0	0	0	0	0	0	0
d__Bacteria	k__norank_d__Bacteria	p__Firmicutes	c__Clostridia	o__Clostridiales	f__Family_XIII	g__Eubacterium]_nodatum_group	s__unclassified_g__Eubacterium]_nodatum_group	OTU1044	0	0	0	0	0	0	0	0	0	0	0	0	0	0	0	0	1	1	0
d__Bacteria	k__norank_d__Bacteria	p__BRC1	c__norank_p__BRC1	o__norank_p__BRC1	f__norank_p__BRC1	g__norank_p__BRC1	s__Omnitrophica_bacterium_OLB16	OTU1045	0	13	0	0	0	0	0	0	0	0	0	0	0	0	0	0	0	0	0
d__Bacteria	k__norank_d__Bacteria	p__Actinobacteria	c__Actinobacteria	o__Microtrichales	f__norank_o__Microtrichales	g__norank_o__Microtrichales	s__unclassified_g__norank_o__Microtrichales	OTU1046	0	2	0	0	0	0	0	0	0	0	0	0	0	0	0	0	0	0	0
d__Bacteria	k__norank_d__Bacteria	p__Chloroflexi	c__Anaerolineae	o__C10-SB1A	f__norank_o__C10-SB1A	g__norank_o__C10-SB1A	s__metagenome_g__norank_o__C10-SB1A	OTU1047	1	0	0	0	0	0	0	0	0	0	0	0	0	0	0	0	0	0	0
d__Bacteria	k__norank_d__Bacteria	p__Proteobacteria	c__Alphaproteobacteria	o__Rickettsiales	f__Anaplasmataceae	g__Wolbachia	s__uncultured_bacterium_g__Wolbachia	OTU1048	7	9	3	1	1	3	8	8	5	4	0	0	0	0	0	0	0	0	0
d__Bacteria	k__norank_d__Bacteria	p__Proteobacteria	c__Alphaproteobacteria	o__Sphingomonadales	f__Sphingomonadaceae	g__Sphingomonas	s__unclassified_g__Sphingomonas	OTU1049	4	1	2	2	0	0	1	0	0	0	6	16	0	0	0	0	0	0	0
d__Bacteria	k__norank_d__Bacteria	p__Firmicutes	c__Clostridia	o__Clostridiales	f__Lachnospiraceae	g__norank_f__Lachnospiraceae	s__unclassified_g__norank_f__Lachnospiraceae	OTU105	2	0	0	0	0	0	0	0	0	0	1	0	0	0	0	0	0	0	0
d__Bacteria	k__norank_d__Bacteria	p__Firmicutes	c__Bacilli	o__Lactobacillales	f__Carnobacteriaceae	g__Carnobacterium	s__uncultured_bacterium_g__Carnobacterium	OTU1050	0	1	0	0	0	0	0	0	0	0	0	5	0	0	0	0	0	0	0
d__Bacteria	k__norank_d__Bacteria	p__Actinobacteria	c__Actinobacteria	o__Corynebacteriales	f__Mycobacteriaceae	g__Mycobacterium	s__Mycobacterium_fortuitum_subsp._fortuitum	OTU1051	1	10	0	1	0	0	0	0	1	0	0	2	0	0	0	0	0	0	0
d__Bacteria	k__norank_d__Bacteria	p__unclassified_k__norank_d__Bacteria	c__unclassified_k__norank_d__Bacteria	o__unclassified_k__norank_d__Bacteria	f__unclassified_k__norank_d__Bacteria	g__unclassified_k__norank_d__Bacteria	s__unclassified_k__norank_d__Bacteria	OTU1052	0	2	0	0	0	0	0	0	0	0	0	0	0	0	0	0	0	0	0
d__Bacteria	k__norank_d__Bacteria	p__Proteobacteria	c__Alphaproteobacteria	o__Caulobacterales	f__Caulobacteraceae	g__Brevundimonas	s__unclassified_g__Brevundimonas	OTU1053	0	13	1	0	0	0	0	0	0	0	0	0	0	0	0	0	0	0	0
d__Bacteria	k__norank_d__Bacteria	p__Bacteroidetes	c__Bacteroidia	o__Chitinophagales	f__Chitinophagaceae	g__norank_f__Chitinophagaceae	s__Terrimonas_sp._16-45A	OTU1054	0	2	0	0	0	0	0	0	0	0	0	0	0	0	0	0	0	0	0
d__Bacteria	k__norank_d__Bacteria	p__Patescibacteria	c__Saccharimonadia	o__Saccharimonadales	f__norank_o__Saccharimonadales	g__norank_o__Saccharimonadales	s__unclassified_g__norank_o__Saccharimonadales	OTU1055	0	3	0	0	0	0	0	0	0	0	0	0	0	0	0	0	0	0	0
d__Bacteria	k__norank_d__Bacteria	p__Proteobacteria	c__Deltaproteobacteria	o__Desulfobacterales	f__Desulfobacteraceae	g__Desulfobacter	s__Desulfobacter_postgatei_2ac9	OTU1056	0	3	0	0	0	0	0	0	0	0	0	0	0	0	0	0	0	0	0
d__Bacteria	k__norank_d__Bacteria	p__Chloroflexi	c__Anaerolineae	o__Caldilineales	f__Caldilineaceae	g__norank_f__Caldilineaceae	s__uncultured_bacterium_g__norank_f__Caldilineaceae	OTU1057	0	3	0	0	0	0	0	0	0	0	0	0	0	0	0	0	0	0	0
d__Bacteria	k__norank_d__Bacteria	p__Hydrogenedentes	c__Hydrogenedentia	o__Hydrogenedentiales	f__Hydrogenedensaceae	g__norank_f__Hydrogenedensaceae	s__uncultured_bacterium_g__norank_f__Hydrogenedensaceae	OTU1058	0	6	0	0	0	0	0	0	0	0	0	0	0	0	0	0	0	0	0
d__Bacteria	k__norank_d__Bacteria	p__Patescibacteria	c__Microgenomatia	o__Candidatus_Pacebacteria	f__norank_o__Candidatus_Pacebacteria	g__norank_o__Candidatus_Pacebacteria	s__uncultured_bacterium_g__norank_o__Candidatus_Pacebacteria	OTU1059	0	6	0	0	0	0	0	0	0	0	0	0	0	0	0	0	0	0	0
d__Bacteria	k__norank_d__Bacteria	p__Actinobacteria	c__Actinobacteria	o__Micrococcales	f__Brevibacteriaceae	g__Brevibacterium	s__Brevibacterium_paucivorans	OTU106	0	0	0	4	0	0	0	3	0	0	5	0	0	0	0	0	0	0	0
d__Bacteria	k__norank_d__Bacteria	p__Proteobacteria	c__Gammaproteobacteria	o__Betaproteobacteriales	f__Rhodocyclaceae	g__Zoogloea	s__unclassified_g__Zoogloea	OTU1060	0	11	0	0	0	0	0	0	0	0	0	0	0	0	0	0	0	0	0
d__Bacteria	k__norank_d__Bacteria	p__Patescibacteria	c__Saccharimonadia	o__Saccharimonadales	f__norank_o__Saccharimonadales	g__norank_o__Saccharimonadales	s__unclassified_g__norank_o__Saccharimonadales	OTU1061	0	12	0	0	0	0	0	0	0	0	0	0	0	0	0	0	0	0	0
d__Bacteria	k__norank_d__Bacteria	p__Proteobacteria	c__Gammaproteobacteria	o__Competibacterales	f__Competibacteraceae	g__Candidatus_Competibacter	s__uncultured_soil_bacterium_g__Candidatus_Competibacter	OTU1062	0	3	0	0	0	0	0	0	0	0	0	0	0	0	0	0	0	0	0
d__Bacteria	k__norank_d__Bacteria	p__Bacteroidetes	c__Bacteroidia	o__Chitinophagales	f__Chitinophagaceae	g__norank_f__Chitinophagaceae	s__unclassified_g__norank_f__Chitinophagaceae	OTU1063	0	1	0	0	0	0	0	0	0	0	0	0	0	0	0	0	0	0	0
d__Bacteria	k__norank_d__Bacteria	p__Bacteroidetes	c__Bacteroidia	o__Sphingobacteriales	f__env.OPS_17	g__norank_f__env.OPS_17	s__uncultured_bacterium_g__norank_f__env.OPS_17	OTU1064	0	3	0	0	0	0	0	0	0	0	0	0	0	0	0	0	0	0	0
d__Bacteria	k__norank_d__Bacteria	p__Proteobacteria	c__Deltaproteobacteria	o__Myxococcales	f__Haliangiaceae	g__Haliangium	s__uncultured_bacterium_g__Haliangium	OTU1065	0	11	0	0	0	0	0	0	0	0	0	0	0	0	0	0	0	0	0
d__Bacteria	k__norank_d__Bacteria	p__Bacteroidetes	c__Bacteroidia	o__Bacteroidales	f__Prolixibacteraceae	g__norank_f__Prolixibacteraceae	s__unclassified_g__norank_f__Prolixibacteraceae	OTU1066	0	3	0	0	0	0	0	0	0	0	0	0	0	0	0	0	0	0	0
d__Bacteria	k__norank_d__Bacteria	p__Bacteroidetes	c__Bacteroidia	o__Sphingobacteriales	f__env.OPS_17	g__norank_f__env.OPS_17	s__uncultured_bacterium_g__norank_f__env.OPS_17	OTU1067	0	3	0	0	0	0	0	0	0	0	0	0	0	0	0	0	0	0	0
d__Bacteria	k__norank_d__Bacteria	p__Bacteroidetes	c__Bacteroidia	o__Chitinophagales	f__37-13	g__norank_f__37-13	s__uncultured_bacterium_g__norank_f__37-13	OTU1068	0	2	0	0	0	0	0	0	0	0	0	0	0	0	0	0	0	0	0
d__Bacteria	k__norank_d__Bacteria	p__Proteobacteria	c__Gammaproteobacteria	o__Xanthomonadales	f__unclassified_o__Xanthomonadales	g__unclassified_o__Xanthomonadales	s__unclassified_o__Xanthomonadales	OTU1069	0	3	0	0	0	0	0	0	0	0	0	0	0	0	0	0	0	0	0
d__Bacteria	k__norank_d__Bacteria	p__Bacteroidetes	c__Bacteroidia	o__Sphingobacteriales	f__Sphingobacteriaceae	g__Sphingobacterium	s__Sphingobacterium_hotanense	OTU107	1	0	0	0	0	0	0	0	0	0	0	0	0	0	0	0	0	0	0
d__Bacteria	k__norank_d__Bacteria	p__Actinobacteria	c__Actinobacteria	o__Propionibacteriales	f__Propionibacteriaceae	g__norank_f__Propionibacteriaceae	s__uncultured_Actinomycetales_bacterium_g__norank_f__Propionibacteriaceae	OTU1070	0	2	0	0	0	0	0	0	0	0	0	0	0	0	0	0	0	0	0
d__Bacteria	k__norank_d__Bacteria	p__Proteobacteria	c__Deltaproteobacteria	o__PB19	f__norank_o__PB19	g__norank_o__PB19	s__metagenome_g__norank_o__PB19	OTU1071	0	2	0	0	0	0	0	0	0	0	0	0	0	0	0	0	0	0	0
d__Bacteria	k__norank_d__Bacteria	p__Chloroflexi	c__Anaerolineae	o__Anaerolineales	f__Anaerolineaceae	g__norank_f__Anaerolineaceae	s__uncultured_sludge_bacterium_S41	OTU1072	0	3	0	0	0	0	0	0	0	0	0	0	0	0	0	0	0	0	0
d__Bacteria	k__norank_d__Bacteria	p__Planctomycetes	c__OM190	o__norank_c__OM190	f__norank_c__OM190	g__norank_c__OM190	s__uncultured_bacterium_g__norank_c__OM190	OTU1073	0	1	0	0	0	0	0	0	0	0	0	0	0	0	0	0	0	0	0
d__Bacteria	k__norank_d__Bacteria	p__Bacteroidetes	c__Bacteroidia	o__Flavobacteriales	f__Flavobacteriaceae	g__Flavobacterium	s__unclassified_g__Flavobacterium	OTU1074	0	3	0	0	0	0	0	0	0	0	0	0	0	0	0	0	0	0	0
d__Bacteria	k__norank_d__Bacteria	p__Acidobacteria	c__Subgroup_6	o__norank_c__Subgroup_6	f__norank_c__Subgroup_6	g__norank_c__Subgroup_6	s__unclassified_g__norank_c__Subgroup_6	OTU1075	3	1	0	0	0	0	0	0	0	0	0	0	0	0	0	0	0	0	0
d__Bacteria	k__norank_d__Bacteria	p__Chloroflexi	c__Chloroflexia	o__Thermomicrobiales	f__JG30-KF-CM45	g__norank_f__JG30-KF-CM45	s__uncultured_bacterium_g__norank_f__JG30-KF-CM45	OTU1076	0	1	0	0	0	0	0	0	0	0	0	0	0	0	0	0	0	0	0
d__Bacteria	k__norank_d__Bacteria	p__Proteobacteria	c__Gammaproteobacteria	o__Xanthomonadales	f__Xanthomonadaceae	g__Pseudoxanthomonas	s__Pseudoxanthomonas_mexicana	OTU1077	0	75	0	0	0	0	0	5	0	1	1	0	0	0	0	0	0	0	0
d__Bacteria	k__norank_d__Bacteria	p__Patescibacteria	c__Saccharimonadia	o__Saccharimonadales	f__norank_o__Saccharimonadales	g__norank_o__Saccharimonadales	s__uncultured_gamma_proteobacterium_g__norank_o__Saccharimonadales	OTU1078	0	3	0	0	0	0	0	0	0	0	0	0	0	0	0	0	0	0	0
d__Bacteria	k__norank_d__Bacteria	p__Proteobacteria	c__Gammaproteobacteria	o__Betaproteobacteriales	f__Burkholderiaceae	g__unclassified_f__Burkholderiaceae	s__unclassified_f__Burkholderiaceae	OTU1079	0	22	0	0	0	0	0	0	0	0	0	0	0	0	0	0	0	0	0
d__Bacteria	k__norank_d__Bacteria	p__Cyanobacteria	c__Oxyphotobacteria	o__Oxyphotobacteria_Incertae_Sedis	f__unclassified_o__Oxyphotobacteria_Incertae_Sedis	g__Leptolyngbya_ANT.L52.2	s__uncultured_bacterium_g__Leptolyngbya_ANT.L52.2	OTU108	0	0	0	1	0	0	0	0	0	1	1	4	0	0	0	0	0	0	0
d__Bacteria	k__norank_d__Bacteria	p__Chloroflexi	c__OLB14	o__norank_c__OLB14	f__norank_c__OLB14	g__norank_c__OLB14	s__uncultured_bacterium_g__norank_c__OLB14	OTU1080	1	23	0	0	0	0	0	0	0	0	0	0	0	0	0	0	0	0	0
d__Bacteria	k__norank_d__Bacteria	p__Proteobacteria	c__Gammaproteobacteria	o__Competibacterales	f__Competibacteraceae	g__Candidatus_Competibacter	s__metagenome_g__Candidatus_Competibacter	OTU1081	0	4	0	0	0	0	0	0	0	0	0	0	0	0	0	0	0	0	0
d__Bacteria	k__norank_d__Bacteria	p__Actinobacteria	c__Actinobacteria	o__Gaiellales	f__norank_o__Gaiellales	g__norank_o__Gaiellales	s__metagenome_g__norank_o__Gaiellales	OTU1082	0	3	0	0	0	0	0	0	0	0	0	0	0	0	0	0	0	0	0
d__Bacteria	k__norank_d__Bacteria	p__Chloroflexi	c__Anaerolineae	o__Caldilineales	f__Caldilineaceae	g__norank_f__Caldilineaceae	s__unclassified_g__norank_f__Caldilineaceae	OTU1083	0	7	0	0	0	0	0	0	0	0	3	0	0	0	0	0	0	0	0
d__Bacteria	k__norank_d__Bacteria	p__Hydrogenedentes	c__Hydrogenedentia	o__Hydrogenedentiales	f__Hydrogenedensaceae	g__norank_f__Hydrogenedensaceae	s__metagenome_g__norank_f__Hydrogenedensaceae	OTU1084	0	8	0	0	0	0	0	0	0	0	0	0	0	0	0	0	0	0	0
d__Bacteria	k__norank_d__Bacteria	p__Proteobacteria	c__Gammaproteobacteria	o__Xanthomonadales	f__Xanthomonadaceae	g__Stenotrophomonas	s__Stenotrophomonas_acidaminiphila	OTU1085	0	1	0	0	0	0	0	0	0	0	0	0	0	0	0	0	0	0	0
d__Bacteria	k__norank_d__Bacteria	p__Proteobacteria	c__Gammaproteobacteria	o__Betaproteobacteriales	f__Nitrosomonadaceae	g__Nitrosomonas	s__metagenome_g__Nitrosomonas	OTU1086	0	2	0	0	0	0	0	0	0	0	0	0	0	0	0	0	0	0	0
d__Bacteria	k__norank_d__Bacteria	p__Proteobacteria	c__Gammaproteobacteria	o__Xanthomonadales	f__Rhodanobacteraceae	g__norank_f__Rhodanobacteraceae	s__uncultured_bacterium_g__norank_f__Rhodanobacteraceae	OTU1087	0	3	0	0	0	0	0	0	0	0	0	0	0	0	0	0	0	0	0
d__Bacteria	k__norank_d__Bacteria	p__Proteobacteria	c__Gammaproteobacteria	o__Betaproteobacteriales	f__Nitrosomonadaceae	g__Ellin6067	s__unclassified_g__Ellin6067	OTU1088	0	20	0	0	0	0	0	0	0	0	0	0	0	0	0	0	0	0	0
d__Bacteria	k__norank_d__Bacteria	p__Proteobacteria	c__Gammaproteobacteria	o__Betaproteobacteriales	f__Burkholderiaceae	g__Hydrogenophaga	s__uncultured_bacterium_g__Hydrogenophaga	OTU1089	0	14	0	0	0	0	0	0	0	0	0	4	0	0	0	0	0	0	0
d__Bacteria	k__norank_d__Bacteria	p__Proteobacteria	c__Alphaproteobacteria	o__Rhizobiales	f__norank_o__Rhizobiales	g__norank_o__Rhizobiales	s__uncultured_bacterium_g__norank_o__Rhizobiales	OTU109	0	0	0	0	0	0	0	0	0	0	2	0	0	0	0	0	0	0	0
d__Bacteria	k__norank_d__Bacteria	p__Bacteroidetes	c__Bacteroidia	o__Chitinophagales	f__Chitinophagaceae	g__Terrimonas	s__uncultured_bacterium_g__Terrimonas	OTU1090	1	20	0	0	0	0	0	0	0	0	0	0	0	0	0	0	0	0	0
d__Bacteria	k__norank_d__Bacteria	p__Bacteroidetes	c__Bacteroidia	o__Sphingobacteriales	f__AKYH767	g__norank_f__AKYH767	s__Bacteroidetes_bacterium_OLB10	OTU1091	0	236	0	0	0	0	0	0	0	0	0	0	0	0	0	0	0	0	0
d__Bacteria	k__norank_d__Bacteria	p__Actinobacteria	c__Actinobacteria	o__Microtrichales	f__Microtrichaceae	g__IMCC26207	s__unclassified_g__IMCC26207	OTU1092	0	4	0	0	0	0	0	0	0	0	0	0	0	0	0	0	0	0	0
d__Bacteria	k__norank_d__Bacteria	p__Bacteroidetes	c__Bacteroidia	o__Sphingobacteriales	f__Lentimicrobiaceae	g__Lentimicrobium	s__uncultured_bacterium_g__Lentimicrobium	OTU1093	0	12	0	0	0	0	0	0	0	0	0	0	0	0	0	0	0	0	0
d__Bacteria	k__norank_d__Bacteria	p__Chloroflexi	c__Chloroflexia	o__Thermomicrobiales	f__JG30-KF-CM45	g__norank_f__JG30-KF-CM45	s__metagenome_g__norank_f__JG30-KF-CM45	OTU1094	0	2	0	0	0	0	0	0	0	0	0	0	0	0	0	0	0	0	0
d__Bacteria	k__norank_d__Bacteria	p__Gemmatimonadetes	c__Gemmatimonadetes	o__Gemmatimonadales	f__Gemmatimonadaceae	g__norank_f__Gemmatimonadaceae	s__metagenome_g__norank_f__Gemmatimonadaceae	OTU1095	0	4	0	0	0	0	0	0	0	0	0	0	0	0	0	0	0	0	0
d__Bacteria	k__norank_d__Bacteria	p__Acidobacteria	c__Blastocatellia_Subgroup_4	o__11-24	f__norank_o__11-24	g__norank_o__11-24	s__uncultured_bacterium_g__norank_o__11-24	OTU1096	0	1	0	0	0	0	0	0	0	0	0	0	0	0	0	0	0	0	0
d__Bacteria	k__norank_d__Bacteria	p__Proteobacteria	c__Gammaproteobacteria	o__Pseudomonadales	f__Pseudomonadaceae	g__Pseudomonas	s__Pseudomonas_stutzeri_g__Pseudomonas	OTU1097	2	68	0	2	2	0	3	1	0	0	5	7	0	1	0	0	0	0	0
d__Bacteria	k__norank_d__Bacteria	p__Patescibacteria	c__Saccharimonadia	o__Saccharimonadales	f__Saccharimonadaceae	g__norank_f__Saccharimonadaceae	s__uncultured_bacterium_g__norank_f__Saccharimonadaceae	OTU1098	0	1	0	0	1	1	0	0	0	0	0	0	0	0	0	0	0	0	0
d__Bacteria	k__norank_d__Bacteria	p__Proteobacteria	c__Gammaproteobacteria	o__Xanthomonadales	f__Rhodanobacteraceae	g__norank_f__Rhodanobacteraceae	s__uncultured_gamma_proteobacterium_g__norank_f__Rhodanobacteraceae	OTU1099	0	8	0	0	0	0	0	0	0	0	0	0	0	0	0	0	0	0	0
d__Bacteria	k__norank_d__Bacteria	p__Proteobacteria	c__Gammaproteobacteria	o__Pseudomonadales	f__Moraxellaceae	g__Perlucidibaca	s__uncultured_bacterium_g__Perlucidibaca	OTU11	0	0	0	0	0	2	0	0	0	0	0	0	0	0	0	0	0	0	0
d__Bacteria	k__norank_d__Bacteria	p__Firmicutes	c__Clostridia	o__Clostridiales	f__Family_XI_o__Clostridiales	g__Ezakiella	s__Bacteroides]_coagulans	OTU110	0	0	0	0	0	0	0	0	0	0	1	0	0	0	0	0	0	0	0
d__Bacteria	k__norank_d__Bacteria	p__Proteobacteria	c__Gammaproteobacteria	o__Pseudomonadales	f__Pseudomonadaceae	g__Pseudomonas	s__unclassified_g__Pseudomonas	OTU1100	1	49	0	0	0	0	0	0	1	0	1	0	0	0	0	0	0	0	0
d__Bacteria	k__norank_d__Bacteria	p__Proteobacteria	c__Gammaproteobacteria	o__Betaproteobacteriales	f__Rhodocyclaceae	g__Zoogloea	s__uncultured_bacterium_g__Zoogloea	OTU1101	0	8	0	0	0	0	0	0	1	0	0	0	0	0	0	0	0	0	0
d__Bacteria	k__norank_d__Bacteria	p__Bacteroidetes	c__Bacteroidia	o__Chitinophagales	f__Saprospiraceae	g__Phaeodactylibacter	s__unclassified_g__Phaeodactylibacter	OTU1102	0	2	0	0	0	0	0	0	0	0	0	0	0	0	0	0	0	0	0
d__Bacteria	k__norank_d__Bacteria	p__Proteobacteria	c__Gammaproteobacteria	o__Competibacterales	f__Competibacteraceae	g__Candidatus_Competibacter	s__uncultured_gamma_proteobacterium_g__Candidatus_Competibacter	OTU1103	0	1	0	0	0	0	0	0	0	0	0	0	0	0	0	0	0	0	0
d__Bacteria	k__norank_d__Bacteria	p__Proteobacteria	c__Deltaproteobacteria	o__Myxococcales	f__Haliangiaceae	g__Haliangium	s__unclassified_g__Haliangium	OTU1104	1	23	0	0	0	0	0	0	0	0	0	0	0	0	0	0	0	0	0
d__Bacteria	k__norank_d__Bacteria	p__Proteobacteria	c__Gammaproteobacteria	o__Betaproteobacteriales	f__Burkholderiaceae	g__AAP99	s__uncultured_bacterium_g__AAP99	OTU1105	0	1	0	0	0	0	0	0	1	0	0	0	0	0	0	0	0	0	0
d__Bacteria	k__norank_d__Bacteria	p__Proteobacteria	c__Gammaproteobacteria	o__Xanthomonadales	f__Rhodanobacteraceae	g__Aquimonas	s__uncultured_bacterium_g__Aquimonas	OTU1106	0	1	0	0	0	0	0	0	0	0	0	0	0	0	0	0	0	0	0
d__Bacteria	k__norank_d__Bacteria	p__Proteobacteria	c__Gammaproteobacteria	o__Betaproteobacteriales	f__Burkholderiaceae	g__Ideonella	s__uncultured_bacterium_g__Ideonella	OTU1107	0	44	0	0	0	0	0	0	0	0	0	0	0	0	0	0	0	0	0
d__Bacteria	k__norank_d__Bacteria	p__Acidobacteria	c__Blastocatellia_Subgroup_4	o__DS-100	f__norank_o__DS-100	g__norank_o__DS-100	s__uncultured_bacterium_g__norank_o__DS-100	OTU1108	0	9	0	0	0	0	0	0	0	0	0	0	0	0	0	0	0	0	0
d__Bacteria	k__norank_d__Bacteria	p__Planctomycetes	c__OM190	o__norank_c__OM190	f__norank_c__OM190	g__norank_c__OM190	s__uncultured_bacterium_g__norank_c__OM190	OTU1109	0	3	0	0	0	0	0	0	0	0	0	0	0	0	0	0	0	0	0
d__Bacteria	k__norank_d__Bacteria	p__Bacteroidetes	c__Bacteroidia	o__Sphingobacteriales	f__Sphingobacteriaceae	g__Mucilaginibacter	s__unclassified_g__Mucilaginibacter	OTU111	0	0	0	0	0	0	0	0	0	0	2	0	0	0	0	0	0	0	0
d__Bacteria	k__norank_d__Bacteria	p__Proteobacteria	c__Alphaproteobacteria	o__Rhodobacterales	f__Rhodobacteraceae	g__Rubellimicrobium	s__unclassified_g__Rubellimicrobium	OTU1110	0	3	0	0	0	0	0	0	0	0	1	0	0	0	0	0	0	0	0
d__Bacteria	k__norank_d__Bacteria	p__Proteobacteria	c__Gammaproteobacteria	o__Betaproteobacteriales	f__Nitrosomonadaceae	g__Nitrosomonas	s__Nitrosomonas_sp._Nm59	OTU1111	0	12	0	0	0	0	0	0	0	0	0	0	0	0	0	0	0	0	0
d__Bacteria	k__norank_d__Bacteria	p__Proteobacteria	c__Gammaproteobacteria	o__PLTA13	f__norank_o__PLTA13	g__norank_o__PLTA13	s__uncultured_sludge_bacterium_g__norank_o__PLTA13	OTU1112	0	6	0	0	0	0	0	0	0	0	0	0	0	0	0	0	0	0	0
d__Bacteria	k__norank_d__Bacteria	p__Proteobacteria	c__Gammaproteobacteria	o__Xanthomonadales	f__Xanthomonadaceae	g__Arenimonas	s__unclassified_g__Arenimonas	OTU1113	0	6	0	0	0	0	0	0	0	0	0	0	0	0	0	0	0	0	0
d__Bacteria	k__norank_d__Bacteria	p__Proteobacteria	c__Gammaproteobacteria	o__Betaproteobacteriales	f__Hydrogenophilaceae	g__norank_f__Hydrogenophilaceae	s__uncultured_Burkholderiales_bacterium_g__norank_f__Hydrogenophilaceae	OTU1114	0	3	0	0	0	0	0	0	0	0	0	0	0	0	0	0	0	0	0
d__Bacteria	k__norank_d__Bacteria	p__Bacteroidetes	c__Bacteroidia	o__Cytophagales	f__Microscillaceae	g__OLB12	s__uncultured_bacterium_g__OLB12	OTU1115	0	7	0	0	0	0	0	0	0	0	0	2	0	0	0	0	0	0	0
d__Bacteria	k__norank_d__Bacteria	p__Proteobacteria	c__Gammaproteobacteria	o__Betaproteobacteriales	f__Burkholderiaceae	g__Limnobacter	s__uncultured_anaerobic_ammonium-oxidizing_bacterium_g__Limnobacter	OTU1116	0	7	0	0	0	0	0	0	0	0	0	0	0	0	0	0	0	0	0
d__Bacteria	k__norank_d__Bacteria	p__Proteobacteria	c__Alphaproteobacteria	o__Rickettsiales	f__SM2D12	g__norank_f__SM2D12	s__unclassified_g__norank_f__SM2D12	OTU1117	0	1	0	0	0	0	0	0	0	0	0	0	0	0	0	0	0	0	0
d__Bacteria	k__norank_d__Bacteria	p__Proteobacteria	c__Deltaproteobacteria	o__Myxococcales	f__Haliangiaceae	g__Haliangium	s__metagenome_g__Haliangium	OTU1118	0	1	0	0	0	0	0	0	0	0	0	0	0	0	0	0	0	0	0
d__Bacteria	k__norank_d__Bacteria	p__Chloroflexi	c__Anaerolineae	o__Anaerolineales	f__Anaerolineaceae	g__Leptolinea	s__unclassified_g__Leptolinea	OTU1119	0	1	0	0	0	0	0	0	0	0	0	0	0	0	0	0	0	0	0
d__Bacteria	k__norank_d__Bacteria	p__Firmicutes	c__Bacilli	o__Bacillales	f__Staphylococcaceae	g__Jeotgalicoccus	s__uncultured_bacterium_g__Jeotgalicoccus	OTU112	0	0	0	0	0	0	0	0	0	0	2	0	0	0	1	0	0	0	0
d__Bacteria	k__norank_d__Bacteria	p__Proteobacteria	c__Gammaproteobacteria	o__Betaproteobacteriales	f__Gallionellaceae	g__Candidatus_Nitrotoga	s__uncultured_bacterium_g__Candidatus_Nitrotoga	OTU1120	0	36	0	0	0	0	0	0	0	0	0	0	0	0	0	0	0	0	0
d__Bacteria	k__norank_d__Bacteria	p__Proteobacteria	c__Deltaproteobacteria	o__Myxococcales	f__Polyangiaceae	g__norank_f__Polyangiaceae	s__uncultured_bacterium_g__norank_f__Polyangiaceae	OTU1123	0	4	0	0	0	0	0	0	0	0	0	0	0	0	0	0	0	0	0
d__Bacteria	k__norank_d__Bacteria	p__Chloroflexi	c__Anaerolineae	o__SBR1031	f__A4b	g__norank_f__A4b	s__uncultured_bacterium_g__norank_f__A4b	OTU1124	0	3	0	0	0	0	0	0	0	0	0	0	0	0	0	0	0	0	0
d__Bacteria	k__norank_d__Bacteria	p__Bacteroidetes	c__Bacteroidia	o__Chitinophagales	f__Chitinophagaceae	g__norank_f__Chitinophagaceae	s__unclassified_g__norank_f__Chitinophagaceae	OTU1125	0	1	0	0	0	0	0	0	0	0	0	0	0	0	0	0	0	0	0
d__Bacteria	k__norank_d__Bacteria	p__Bacteroidetes	c__Bacteroidia	o__Flavobacteriales	f__Flavobacteriaceae	g__Flavobacterium	s__Flavobacterium_sp._R046	OTU1126	0	1	0	0	0	0	0	0	0	0	0	0	0	0	0	0	0	0	0
d__Bacteria	k__norank_d__Bacteria	p__Chloroflexi	c__Chloroflexia	o__Thermomicrobiales	f__JG30-KF-CM45	g__norank_f__JG30-KF-CM45	s__metagenome_g__norank_f__JG30-KF-CM45	OTU1127	0	8	0	0	0	0	0	0	0	0	0	0	0	0	0	0	0	0	0
d__Bacteria	k__norank_d__Bacteria	p__Planctomycetes	c__Planctomycetacia	o__Gemmatales	f__Gemmataceae	g__norank_f__Gemmataceae	s__uncultured_bacterium_g__norank_f__Gemmataceae	OTU1128	0	2	0	0	0	0	0	0	0	0	0	0	0	0	0	0	0	0	0
d__Bacteria	k__norank_d__Bacteria	p__Verrucomicrobia	c__Verrucomicrobiae	o__Verrucomicrobiales	f__Verrucomicrobiaceae	g__norank_f__Verrucomicrobiaceae	s__uncultured_bacterium_g__norank_f__Verrucomicrobiaceae	OTU1129	0	1	0	0	0	0	0	0	0	0	0	0	0	0	0	0	0	0	0
d__Bacteria	k__norank_d__Bacteria	p__Proteobacteria	c__Deltaproteobacteria	o__Desulfovibrionales	f__Desulfovibrionaceae	g__Desulfovibrio	s__uncultured_bacterium_g__Desulfovibrio	OTU113	0	0	0	0	0	1	0	0	0	0	2	0	0	0	0	0	0	0	0
d__Bacteria	k__norank_d__Bacteria	p__Chloroflexi	c__Anaerolineae	o__C10-SB1A	f__norank_o__C10-SB1A	g__norank_o__C10-SB1A	s__metagenome_g__norank_o__C10-SB1A	OTU1130	0	1	0	0	0	0	0	0	0	0	0	0	0	0	0	0	0	0	0
d__Bacteria	k__norank_d__Bacteria	p__Verrucomicrobia	c__Verrucomicrobiae	o__Opitutales	f__Opitutaceae	g__unclassified_f__Opitutaceae	s__unclassified_f__Opitutaceae	OTU1131	0	3	0	0	0	0	0	0	0	0	0	0	0	0	0	0	0	0	0
d__Bacteria	k__norank_d__Bacteria	p__Firmicutes	c__Clostridia	o__Clostridiales	f__Lachnospiraceae	g__unclassified_f__Lachnospiraceae	s__unclassified_f__Lachnospiraceae	OTU1133	0	1	0	0	0	0	0	0	0	0	0	0	0	0	2	0	0	0	0
d__Bacteria	k__norank_d__Bacteria	p__Bacteroidetes	c__Bacteroidia	o__Chitinophagales	f__Chitinophagaceae	g__Flavihumibacter	s__uncultured_bacterium_g__Flavihumibacter	OTU1134	0	11	0	0	0	0	0	0	0	0	0	1	0	0	0	0	0	0	0
d__Bacteria	k__norank_d__Bacteria	p__Actinobacteria	c__Actinobacteria	o__Microtrichales	f__Microtrichaceae	g__norank_f__Microtrichaceae	s__metagenome_g__norank_f__Microtrichaceae	OTU1135	0	15	0	0	0	0	0	0	0	0	0	0	0	0	0	0	0	0	0
d__Bacteria	k__norank_d__Bacteria	p__Chloroflexi	c__Anaerolineae	o__Caldilineales	f__Caldilineaceae	g__norank_f__Caldilineaceae	s__uncultured_bacterium_g__norank_f__Caldilineaceae	OTU1136	0	4	0	0	0	0	0	0	0	0	0	0	0	0	0	0	0	0	0
d__Bacteria	k__norank_d__Bacteria	p__Chloroflexi	c__Chloroflexia	o__Thermomicrobiales	f__JG30-KF-CM45	g__norank_f__JG30-KF-CM45	s__unclassified_g__norank_f__JG30-KF-CM45	OTU1137	0	41	0	0	0	0	0	0	0	0	0	0	0	0	0	0	0	0	0
d__Bacteria	k__norank_d__Bacteria	p__Chloroflexi	c__Anaerolineae	o__SBR1031	f__A4b	g__norank_f__A4b	s__uncultured_bacterium_g__norank_f__A4b	OTU1138	0	3	0	0	0	0	0	0	0	0	0	0	0	0	0	0	0	0	0
d__Bacteria	k__norank_d__Bacteria	p__Bacteroidetes	c__Bacteroidia	o__Sphingobacteriales	f__Lentimicrobiaceae	g__norank_f__Lentimicrobiaceae	s__uncultured_Owenweeksia_sp._g__norank	OTU1139	0	2	0	0	0	0	0	0	0	0	0	0	0	0	0	0	0	0	0
d__Bacteria	k__norank_d__Bacteria	p__Bacteroidetes	c__Bacteroidia	o__Flavobacteriales	f__Weeksellaceae	g__Moheibacter	s__uncultured_bacterium_g__Moheibacter	OTU114	0	0	0	0	0	0	0	0	0	0	2	0	0	0	0	0	0	0	0
d__Bacteria	k__norank_d__Bacteria	p__Chloroflexi	c__Anaerolineae	o__Caldilineales	f__Caldilineaceae	g__norank_f__Caldilineaceae	s__metagenome_g__norank_f__Caldilineaceae	OTU1140	0	1	0	0	0	0	0	0	0	0	0	0	0	0	0	0	0	0	0
d__Bacteria	k__norank_d__Bacteria	p__Proteobacteria	c__Deltaproteobacteria	o__Myxococcales	f__Archangiaceae	g__Anaeromyxobacter	s__unclassified_g__Anaeromyxobacter	OTU1141	0	2	0	0	0	0	0	0	0	0	0	0	0	0	0	0	0	0	0
d__Bacteria	k__norank_d__Bacteria	p__Chloroflexi	c__Anaerolineae	o__Caldilineales	f__Caldilineaceae	g__norank_f__Caldilineaceae	s__uncultured_bacterium_g__norank_f__Caldilineaceae	OTU1142	0	2	0	0	0	0	0	0	0	0	0	0	0	0	0	0	0	0	0
d__Bacteria	k__norank_d__Bacteria	p__Proteobacteria	c__Gammaproteobacteria	o__Betaproteobacteriales	f__Rhodocyclaceae	g__Dechlorobacter	s__uncultured_bacterium_g__Dechlorobacter	OTU1143	0	4	0	0	0	0	0	0	0	0	0	0	0	0	0	0	0	0	0
d__Bacteria	k__norank_d__Bacteria	p__Proteobacteria	c__Alphaproteobacteria	o__Caulobacterales	f__Hyphomonadaceae	g__Hyphomonas	s__uncultured_bacterium_g__Hyphomonas	OTU1144	1	4	0	0	0	0	0	0	0	0	0	0	0	0	0	0	0	0	0
d__Bacteria	k__norank_d__Bacteria	p__Chloroflexi	c__Anaerolineae	o__SBR1031	f__A4b	g__norank_f__A4b	s__unclassified_g__norank_f__A4b	OTU1145	0	1	0	0	0	0	0	0	0	0	0	0	0	0	0	0	0	0	0
d__Bacteria	k__norank_d__Bacteria	p__Chloroflexi	c__Anaerolineae	o__Caldilineales	f__Caldilineaceae	g__norank_f__Caldilineaceae	s__uncultured_bacterium_g__norank_f__Caldilineaceae	OTU1146	0	1	0	0	0	0	0	0	0	0	0	0	0	0	0	0	0	0	0
d__Bacteria	k__norank_d__Bacteria	p__Chloroflexi	c__Anaerolineae	o__Caldilineales	f__Caldilineaceae	g__norank_f__Caldilineaceae	s__uncultured_bacterium_g__norank_f__Caldilineaceae	OTU1147	0	19	0	0	0	0	0	0	0	0	0	0	0	0	0	0	0	0	0
d__Bacteria	k__norank_d__Bacteria	p__Chloroflexi	c__Anaerolineae	o__SBR1031	f__A4b	g__OLB13	s__uncultured_bacterium_g__OLB13	OTU1148	0	6	0	0	0	0	0	0	0	0	0	0	0	0	0	0	0	0	0
d__Bacteria	k__norank_d__Bacteria	p__Proteobacteria	c__Alphaproteobacteria	o__Rhizobiales	f__Xanthobacteraceae	g__Pseudorhodoplanes	s__uncultured_bacterium_g__Pseudorhodoplanes	OTU1149	1	3	0	1	0	0	0	0	0	0	0	1	0	0	0	0	0	0	0
d__Bacteria	k__norank_d__Bacteria	p__Firmicutes	c__Clostridia	o__Clostridiales	f__Family_XI_o__Clostridiales	g__Peptoniphilus	s__Peptoniphilus_obesi_ph1	OTU115	0	0	0	0	0	0	0	0	0	0	3	0	0	0	0	0	0	0	0
d__Bacteria	k__norank_d__Bacteria	p__Bacteroidetes	c__Ignavibacteria	o__Ignavibacteriales	f__PHOS-HE36	g__norank_f__PHOS-HE36	s__uncultured_soil_bacterium_g__norank_f__PHOS-HE36	OTU1150	0	4	0	0	0	0	0	0	0	0	0	0	0	0	0	0	0	0	0
d__Bacteria	k__norank_d__Bacteria	p__Dependentiae	c__Babeliae	o__Babeliales	f__Vermiphilaceae	g__norank_f__Vermiphilaceae	s__uncultured_Candidatus_Dependentiae_bacterium_g__norank	OTU1151	0	2	0	0	0	0	0	0	0	0	0	0	0	0	0	0	0	0	0
d__Bacteria	k__norank_d__Bacteria	p__Proteobacteria	c__Deltaproteobacteria	o__Desulfobacterales	f__Desulfobulbaceae	g__Desulfobacterium]_catecholicum_group	s__uncultured_bacterium_g__Desulfobacterium]_catecholicum_group	OTU1152	0	2	0	0	0	0	0	0	0	0	0	0	0	0	0	0	0	0	0
d__Bacteria	k__norank_d__Bacteria	p__Chloroflexi	c__Anaerolineae	o__1-20	f__norank_o__1-20	g__norank_o__1-20	s__metagenome_g__norank_o__1-20	OTU1153	0	4	0	0	0	0	0	0	0	0	0	0	0	0	0	0	0	0	0
d__Bacteria	k__norank_d__Bacteria	p__Chloroflexi	c__Anaerolineae	o__Anaerolineales	f__Anaerolineaceae	g__norank_f__Anaerolineaceae	s__uncultured_prokaryote_g__norank_f__Anaerolineaceae	OTU1154	0	2	0	0	0	0	0	0	0	0	0	0	0	0	0	0	0	0	0
d__Bacteria	k__norank_d__Bacteria	p__Proteobacteria	c__Gammaproteobacteria	o__Betaproteobacteriales	f__Rhodocyclaceae	g__Zoogloea	s__metagenome_g__Zoogloea	OTU1155	0	3	0	0	0	0	0	0	0	0	0	0	0	0	0	0	0	0	0
d__Bacteria	k__norank_d__Bacteria	p__Proteobacteria	c__Alphaproteobacteria	o__Rhizobiales	f__Rhizobiales_Incertae_Sedis	g__norank_f__Rhizobiales_Incertae_Sedis	s__unclassified_g__norank_f__Rhizobiales_Incertae_Sedis	OTU1156	0	1	0	0	0	0	0	0	0	0	0	0	0	0	0	0	0	0	0
d__Bacteria	k__norank_d__Bacteria	p__Actinobacteria	c__Actinobacteria	o__Frankiales	f__Cryptosporangiaceae	g__Fodinicola	s__metagenome_g__Fodinicola	OTU1157	0	2	0	0	0	0	0	0	0	0	0	0	0	0	0	0	0	0	0
d__Bacteria	k__norank_d__Bacteria	p__Proteobacteria	c__Gammaproteobacteria	o__Betaproteobacteriales	f__Burkholderiaceae	g__Diaphorobacter	s__unclassified_g__Diaphorobacter	OTU1158	0	9	0	0	0	0	0	0	0	0	0	0	0	0	0	0	0	0	0
d__Bacteria	k__norank_d__Bacteria	p__Chloroflexi	c__Anaerolineae	o__Caldilineales	f__Caldilineaceae	g__norank_f__Caldilineaceae	s__uncultured_bacterium_g__norank_f__Caldilineaceae	OTU1159	0	3	0	0	0	0	0	0	0	0	0	0	0	0	0	0	0	0	0
d__Bacteria	k__norank_d__Bacteria	p__Bacteroidetes	c__Bacteroidia	o__Sphingobacteriales	f__Sphingobacteriaceae	g__Sphingobacterium	s__Sphingobacterium_multivorum	OTU116	0	1	0	0	2	0	1	0	1	0	71	0	0	0	0	0	0	0	0
d__Bacteria	k__norank_d__Bacteria	p__Chloroflexi	c__Anaerolineae	o__Anaerolineales	f__Anaerolineaceae	g__norank_f__Anaerolineaceae	s__unclassified_g__norank_f__Anaerolineaceae	OTU1160	0	9	0	0	0	0	0	0	0	0	0	0	0	0	0	0	0	0	0
d__Bacteria	k__norank_d__Bacteria	p__Chloroflexi	c__Chloroflexia	o__Chloroflexales	f__Herpetosiphonaceae	g__Herpetosiphon	s__unclassified_g__Herpetosiphon	OTU1161	0	4	0	0	0	0	0	0	0	0	0	0	0	0	0	0	0	0	0
d__Bacteria	k__norank_d__Bacteria	p__Chloroflexi	c__Anaerolineae	o__Caldilineales	f__Caldilineaceae	g__norank_f__Caldilineaceae	s__unclassified_g__norank_f__Caldilineaceae	OTU1162	0	5	0	0	0	0	0	0	0	0	0	0	0	0	0	0	0	0	0
d__Bacteria	k__norank_d__Bacteria	p__Chloroflexi	c__Anaerolineae	o__SBR1031	f__A4b	g__norank_f__A4b	s__metagenome_g__norank_f__A4b	OTU1163	0	3	0	0	0	0	0	0	0	0	0	0	0	0	0	0	0	0	0
d__Bacteria	k__norank_d__Bacteria	p__Planctomycetes	c__Phycisphaerae	o__Phycisphaerales	f__Phycisphaeraceae	g__SM1A02	s__metagenome_g__SM1A02	OTU1164	0	2	0	0	0	0	0	0	0	0	0	0	0	0	0	0	0	0	0
d__Bacteria	k__norank_d__Bacteria	p__Chloroflexi	c__Anaerolineae	o__SBR1031	f__norank_o__SBR1031	g__norank_o__SBR1031	s__uncultured_Caldilineaceae_bacterium_g__norank_o__SBR1031	OTU1165	0	3	0	0	0	0	0	0	0	0	0	0	0	0	0	0	0	0	0
d__Bacteria	k__norank_d__Bacteria	p__Chloroflexi	c__Anaerolineae	o__Caldilineales	f__Caldilineaceae	g__norank_f__Caldilineaceae	s__metagenome_g__norank_f__Caldilineaceae	OTU1166	0	18	0	0	0	0	0	0	0	0	1	0	0	0	0	0	0	0	0
d__Bacteria	k__norank_d__Bacteria	p__Proteobacteria	c__Gammaproteobacteria	o__Betaproteobacteriales	f__SC-I-84	g__norank_f__SC-I-84	s__unclassified_g__norank_f__SC-I-84	OTU1167	0	8	0	0	0	0	0	0	0	0	0	0	0	0	0	0	0	0	0
d__Bacteria	k__norank_d__Bacteria	p__Chloroflexi	c__Anaerolineae	o__Caldilineales	f__Caldilineaceae	g__norank_f__Caldilineaceae	s__unclassified_g__norank_f__Caldilineaceae	OTU1168	2	17	0	0	0	0	0	0	0	0	0	0	0	0	0	0	0	0	0
d__Bacteria	k__norank_d__Bacteria	p__Bacteroidetes	c__Bacteroidia	o__Chitinophagales	f__Saprospiraceae	g__Phaeodactylibacter	s__uncultured_bacterium_g__Phaeodactylibacter	OTU1169	0	2	0	0	0	0	0	0	0	0	0	0	0	0	0	0	0	0	0
d__Bacteria	k__norank_d__Bacteria	p__Firmicutes	c__Bacilli	o__Bacillales	f__Paenibacillaceae	g__Thermobacillus	s__unclassified_g__Thermobacillus	OTU117	0	0	0	0	0	0	0	0	0	0	4	0	0	0	0	0	0	0	0
d__Bacteria	k__norank_d__Bacteria	p__Bacteroidetes	c__Ignavibacteria	o__SJA-28	f__norank_o__SJA-28	g__norank_o__SJA-28	s__unclassified_g__norank_o__SJA-28	OTU1170	0	29	0	0	0	0	0	0	0	0	0	0	0	0	0	0	0	0	0
d__Bacteria	k__norank_d__Bacteria	p__Proteobacteria	c__Alphaproteobacteria	o__Sphingomonadales	f__Sphingomonadaceae	g__Sphingobium	s__Sphingobium_amiense	OTU1171	2	2	0	0	4	1	0	0	0	0	2	0	0	0	0	0	0	0	0
d__Bacteria	k__norank_d__Bacteria	p__Proteobacteria	c__Alphaproteobacteria	o__Sphingomonadales	f__Sphingomonadaceae	g__Sphingosinicella	s__uncultured_Sphingomonadaceae_bacterium_g__Sphingosinicella	OTU1172	2	8	0	0	0	0	0	0	1	0	0	1	0	0	0	0	0	0	0
d__Bacteria	k__norank_d__Bacteria	p__Chloroflexi	c__Anaerolineae	o__SBR1031	f__norank_o__SBR1031	g__norank_o__SBR1031	s__uncultured_Caldilineaceae_bacterium_g__norank_o__SBR1031	OTU1173	0	5	0	0	0	0	0	0	0	0	0	0	0	0	0	0	0	0	0
d__Bacteria	k__norank_d__Bacteria	p__Firmicutes	c__BRH-c20a	o__norank_c__BRH-c20a	f__norank_c__BRH-c20a	g__norank_c__BRH-c20a	s__uncultured_Peptococcaceae_bacterium_g__norank_c__BRH-c20a	OTU1174	0	143	0	0	0	0	0	0	0	0	0	11	0	0	0	0	0	0	0
d__Bacteria	k__norank_d__Bacteria	p__Bacteroidetes	c__Bacteroidia	o__Sphingobacteriales	f__AKYH767	g__norank_f__AKYH767	s__unclassified_g__norank_f__AKYH767	OTU1175	0	1	0	0	0	0	0	0	0	0	0	0	0	0	0	0	0	0	0
d__Bacteria	k__norank_d__Bacteria	p__Chloroflexi	c__Anaerolineae	o__SBR1031	f__norank_o__SBR1031	g__norank_o__SBR1031	s__metagenome_g__norank_o__SBR1031	OTU1176	0	6	0	0	0	0	0	0	0	0	0	0	0	0	0	0	0	0	0
d__Bacteria	k__norank_d__Bacteria	p__Chloroflexi	c__Anaerolineae	o__Anaerolineales	f__Anaerolineaceae	g__norank_f__Anaerolineaceae	s__uncultured_Chloroflexi_bacterium_g__norank_f__Anaerolineaceae	OTU1177	0	3	0	0	0	0	0	0	0	0	0	0	0	0	0	0	0	0	0
d__Bacteria	k__norank_d__Bacteria	p__BRC1	c__norank_p__BRC1	o__norank_p__BRC1	f__norank_p__BRC1	g__norank_p__BRC1	s__unclassified_g__norank_p__BRC1	OTU1178	0	3	0	0	0	0	0	0	0	0	0	0	0	0	0	0	0	0	0
d__Bacteria	k__norank_d__Bacteria	p__unclassified_k__norank_d__Bacteria	c__unclassified_k__norank_d__Bacteria	o__unclassified_k__norank_d__Bacteria	f__unclassified_k__norank_d__Bacteria	g__unclassified_k__norank_d__Bacteria	s__unclassified_k__norank_d__Bacteria	OTU1179	0	1	0	0	0	0	0	0	0	0	0	0	0	0	0	0	0	0	0
d__Bacteria	k__norank_d__Bacteria	p__Bacteroidetes	c__Bacteroidia	o__Bacteroidales	f__Bacteroidaceae	g__Bacteroides	s__unclassified_g__Bacteroides	OTU118	1	1	1	0	2	1	1	0	0	0	2	0	0	0	0	0	0	3	0
d__Bacteria	k__norank_d__Bacteria	p__Proteobacteria	c__Deltaproteobacteria	o__Desulfuromonadales	f__Geobacteraceae	g__Geobacter	s__unclassified_g__Geobacter	OTU1180	0	1	0	0	0	0	0	0	0	0	0	0	0	0	0	0	0	0	0
d__Bacteria	k__norank_d__Bacteria	p__Acidobacteria	c__Subgroup_6	o__unclassified	f__unclassified_c__Subgroup_6	g__Luteitalea	s__uncultured_bacterium_g__Luteitalea	OTU1181	0	3	0	0	0	0	0	0	0	0	0	0	0	0	0	0	0	0	0
d__Bacteria	k__norank_d__Bacteria	p__Verrucomicrobia	c__Verrucomicrobiae	o__Verrucomicrobiales	f__DEV007	g__norank_f__DEV007	s__uncultured_Verrucomicrobiales_bacterium_g__norank_f__DEV007	OTU1182	0	7	0	0	0	0	0	0	0	0	0	0	0	0	0	0	0	0	0
d__Bacteria	k__norank_d__Bacteria	p__Proteobacteria	c__Gammaproteobacteria	o__Betaproteobacteriales	f__Nitrosomonadaceae	g__MND1	s__uncultured_bacterium_g__MND1	OTU1183	0	2	0	0	0	0	0	0	0	0	0	0	0	0	0	0	0	0	0
d__Bacteria	k__norank_d__Bacteria	p__Firmicutes	c__Clostridia	o__Clostridiales	f__Ruminococcaceae	g__Ruminococcaceae_UCG-010	s__uncultured_bacterium_g__Ruminococcaceae_UCG-010	OTU1184	0	0	0	0	0	0	0	0	0	0	0	0	0	3	2	0	3	0	1
d__Bacteria	k__norank_d__Bacteria	p__Firmicutes	c__Clostridia	o__Clostridiales	f__Lachnospiraceae	g__Acetitomaculum	s__uncultured_bacterium_g__Acetitomaculum	OTU1185	0	0	0	0	0	0	0	0	0	0	0	0	0	2	0	0	0	0	0
d__Bacteria	k__norank_d__Bacteria	p__Firmicutes	c__Clostridia	o__Clostridiales	f__Lachnospiraceae	g__Ruminococcus]_gauvreauii_group	s__uncultured_bacterium_g__Ruminococcus]_gauvreauii_group	OTU1186	1	0	0	0	1	0	0	0	0	0	0	1	98	283	68	102	92	43	47
d__Bacteria	k__norank_d__Bacteria	p__Bacteroidetes	c__Bacteroidia	o__Bacteroidales	f__Muribaculaceae	g__norank_f__Muribaculaceae	s__uncultured_bacterium_g__norank_f__Muribaculaceae	OTU1187	0	0	0	0	0	0	0	0	0	0	0	0	0	66	2	1	15	18	1
d__Bacteria	k__norank_d__Bacteria	p__Bacteroidetes	c__Bacteroidia	o__Bacteroidales	f__Muribaculaceae	g__norank_f__Muribaculaceae	s__uncultured_bacterium_g__norank_f__Muribaculaceae	OTU1188	0	0	0	0	0	0	0	0	0	0	0	0	3	110	29	14	30	3	8
d__Bacteria	k__norank_d__Bacteria	p__Bacteroidetes	c__Bacteroidia	o__Bacteroidales	f__Rikenellaceae	g__Rikenellaceae_RC9_gut_group	s__uncultured_bacterium_g__Rikenellaceae_RC9_gut_group	OTU1189	0	0	0	0	0	0	0	0	0	0	0	0	0	11	0	0	4	0	0
d__Bacteria	k__norank_d__Bacteria	p__Actinobacteria	c__Actinobacteria	o__Micrococcales	f__unclassified_o__Micrococcales	g__unclassified_o__Micrococcales	s__unclassified_o__Micrococcales	OTU119	0	0	0	0	0	0	0	0	0	0	1	0	0	0	0	0	0	0	0
d__Bacteria	k__norank_d__Bacteria	p__Proteobacteria	c__Gammaproteobacteria	o__Aeromonadales	f__Succinivibrionaceae	g__Succinivibrio	s__uncultured_bacterium_g__Succinivibrio	OTU1190	0	0	0	0	0	0	0	0	0	0	0	0	4	38	40	1	67	54	29
d__Bacteria	k__norank_d__Bacteria	p__Firmicutes	c__Erysipelotrichia	o__Erysipelotrichales	f__Erysipelotrichaceae	g__unclassified_f__Erysipelotrichaceae	s__unclassified_f__Erysipelotrichaceae	OTU1191	0	0	0	0	0	0	0	0	0	0	0	0	0	2	0	0	0	2	0
d__Bacteria	k__norank_d__Bacteria	p__Firmicutes	c__Clostridia	o__Clostridiales	f__Lachnospiraceae	g__unclassified_f__Lachnospiraceae	s__unclassified_f__Lachnospiraceae	OTU1192	0	0	0	0	0	0	0	0	0	0	0	0	0	14	0	0	6	0	0
d__Bacteria	k__norank_d__Bacteria	p__WPS-2	c__norank_p__WPS-2	o__norank_p__WPS-2	f__norank_p__WPS-2	g__norank_p__WPS-2	s__uncultured_rumen_bacterium_g__norank_p__WPS-2	OTU1193	0	0	0	0	0	0	0	0	0	0	0	0	0	237	3	1	149	8	0
d__Bacteria	k__norank_d__Bacteria	p__Firmicutes	c__Clostridia	o__Clostridiales	f__Ruminococcaceae	g__Oscillibacter	s__unclassified_g__Oscillibacter	OTU1194	0	0	0	0	0	0	0	0	0	0	0	0	0	18	3	6	15	7	5
d__Bacteria	k__norank_d__Bacteria	p__Firmicutes	c__Clostridia	o__Clostridiales	f__Ruminococcaceae	g__Oscillibacter	s__uncultured_bacterium_g__Oscillibacter	OTU1195	0	0	0	0	0	0	0	0	0	0	0	0	4	131	10	18	27	13	6
d__Bacteria	k__norank_d__Bacteria	p__Firmicutes	c__Clostridia	o__Clostridiales	f__Ruminococcaceae	g__Ruminococcaceae_UCG-010	s__uncultured_Ruminococcaceae_bacterium_g__Ruminococcaceae_UCG-010	OTU1196	0	0	0	0	0	0	0	0	0	0	0	0	0	1	0	0	0	0	0
d__Bacteria	k__norank_d__Bacteria	p__Bacteroidetes	c__Bacteroidia	o__Bacteroidales	f__Muribaculaceae	g__norank_f__Muribaculaceae	s__uncultured_organism_g__norank_f__Muribaculaceae	OTU1197	0	0	0	0	0	0	0	0	0	0	0	0	0	1	0	0	0	5	1
d__Bacteria	k__norank_d__Bacteria	p__Bacteroidetes	c__Bacteroidia	o__Bacteroidales	f__Muribaculaceae	g__norank_f__Muribaculaceae	s__uncultured_bacterium_g__norank_f__Muribaculaceae	OTU1198	0	0	0	0	0	0	0	0	0	0	0	0	0	631	156	61	58	41	19
d__Bacteria	k__norank_d__Bacteria	p__Firmicutes	c__Clostridia	o__Clostridiales	f__Ruminococcaceae	g__Ruminococcaceae_UCG-010	s__uncultured_bacterium_g__Ruminococcaceae_UCG-010	OTU1199	0	0	0	0	0	0	0	0	0	0	0	0	0	11	0	1	4	0	0
d__Bacteria	k__norank_d__Bacteria	p__Proteobacteria	c__Gammaproteobacteria	o__Betaproteobacteriales	f__Burkholderiaceae	g__unclassified_f__Burkholderiaceae	s__unclassified_f__Burkholderiaceae	OTU12	0	0	0	0	0	0	10	0	0	0	0	0	0	0	0	0	0	0	0
d__Bacteria	k__norank_d__Bacteria	p__Actinobacteria	c__Actinobacteria	o__Propionibacteriales	f__Nocardioidaceae	g__Nocardioides	s__Nocardioides_albus	OTU120	0	0	0	0	0	0	0	0	0	0	4	0	0	0	0	0	0	0	0
d__Bacteria	k__norank_d__Bacteria	p__Firmicutes	c__Clostridia	o__Clostridiales	f__unclassified_o__Clostridiales	g__unclassified_o__Clostridiales	s__unclassified_o__Clostridiales	OTU1200	0	0	0	0	0	0	0	0	0	0	0	0	0	13	0	1	9	2	0
d__Bacteria	k__norank_d__Bacteria	p__Proteobacteria	c__Deltaproteobacteria	o__Desulfovibrionales	f__Desulfovibrionaceae	g__Desulfovibrio	s__unclassified_g__Desulfovibrio	OTU1201	0	0	0	0	0	0	0	0	0	0	0	0	0	3	0	0	0	0	0
d__Bacteria	k__norank_d__Bacteria	p__Firmicutes	c__Clostridia	o__Clostridiales	f__Christensenellaceae	g__Christensenellaceae_R-7_group	s__unclassified_g__Christensenellaceae_R-7_group	OTU1202	0	0	0	0	0	0	0	0	0	0	0	0	4	30	2	11	6	8	8
d__Bacteria	k__norank_d__Bacteria	p__Firmicutes	c__Clostridia	o__Clostridiales	f__Ruminococcaceae	g__Ruminococcaceae_UCG-007	s__uncultured_rumen_bacterium_g__Ruminococcaceae_UCG-007	OTU1203	0	0	0	0	0	0	0	0	0	0	0	0	0	11	1	1	3	3	1
d__Bacteria	k__norank_d__Bacteria	p__Firmicutes	c__Clostridia	o__Clostridiales	f__Lachnospiraceae	g__Lachnospiraceae_XPB1014_group	s__uncultured_bacterium_g__Lachnospiraceae_XPB1014_group	OTU1204	0	0	0	0	0	0	0	0	0	0	0	0	0	717	0	0	395	11	0
d__Bacteria	k__norank_d__Bacteria	p__Firmicutes	c__Clostridia	o__Clostridiales	f__Ruminococcaceae	g__unclassified_f__Ruminococcaceae	s__unclassified_f__Ruminococcaceae	OTU1205	0	0	0	0	0	0	0	0	0	0	0	0	0	4	0	0	0	0	0
d__Bacteria	k__norank_d__Bacteria	p__Firmicutes	c__Clostridia	o__Clostridiales	f__Christensenellaceae	g__norank_f__Christensenellaceae	s__uncultured_bacterium_g__norank_f__Christensenellaceae	OTU1206	0	0	0	0	0	0	0	0	0	0	0	0	0	8	0	1	0	1	1
d__Bacteria	k__norank_d__Bacteria	p__Firmicutes	c__Clostridia	o__Clostridiales	f__Ruminococcaceae	g__Ruminococcaceae_UCG-010	s__uncultured_bacterium_g__Ruminococcaceae_UCG-010	OTU1207	0	0	0	0	0	0	0	0	0	0	0	0	0	8	0	0	0	0	0
d__Bacteria	k__norank_d__Bacteria	p__Proteobacteria	c__unclassified_p__Proteobacteria	o__unclassified_p__Proteobacteria	f__unclassified_p__Proteobacteria	g__unclassified_p__Proteobacteria	s__unclassified_p__Proteobacteria	OTU1208	0	0	0	0	0	0	0	0	0	0	0	0	0	6	0	0	0	1	0
d__Bacteria	k__norank_d__Bacteria	p__Firmicutes	c__Clostridia	o__Clostridiales	f__Eubacteriaceae	g__Anaerofustis	s__uncultured_organism_g__Anaerofustis	OTU1209	0	0	0	0	0	0	0	0	0	0	0	0	0	1	0	0	0	0	1
d__Bacteria	k__norank_d__Bacteria	p__Actinobacteria	c__Actinobacteria	o__Micrococcales	f__Brevibacteriaceae	g__Brevibacterium	s__Brevibacterium_epidermidis	OTU121	3	0	0	0	0	0	0	0	0	0	3	0	0	0	0	0	0	0	0
d__Bacteria	k__norank_d__Bacteria	p__Firmicutes	c__Clostridia	o__Clostridiales	f__Ruminococcaceae	g__Ruminococcaceae_NK4A214_group	s__unclassified_g__Ruminococcaceae_NK4A214_group	OTU1210	0	0	0	0	0	0	0	0	0	0	0	0	0	2	1	1	2	1	0
d__Bacteria	k__norank_d__Bacteria	p__Firmicutes	c__Erysipelotrichia	o__Erysipelotrichales	f__Erysipelotrichaceae	g__norank_f__Erysipelotrichaceae	s__uncultured_bacterium_g__norank_f__Erysipelotrichaceae	OTU1211	0	0	0	0	0	0	0	0	0	0	0	0	45	362	55	66	60	104	53
d__Bacteria	k__norank_d__Bacteria	p__Firmicutes	c__Clostridia	o__Clostridiales	f__Lachnospiraceae	g__Butyrivibrio	s__unclassified_g__Butyrivibrio	OTU1212	0	0	0	0	0	0	0	0	0	0	0	0	0	28	4	0	0	5	9
d__Bacteria	k__norank_d__Bacteria	p__Firmicutes	c__Clostridia	o__Clostridiales	f__Clostridiaceae_1	g__Clostridium_sensu_stricto_1	s__uncultured_Clostridium_sp._g__Clostridium_sensu_stricto_1	OTU1213	0	0	0	0	0	0	0	0	0	0	0	0	1	15	0	0	0	0	0
d__Bacteria	k__norank_d__Bacteria	p__Firmicutes	c__Clostridia	o__Clostridiales	f__Ruminococcaceae	g__unclassified_f__Ruminococcaceae	s__unclassified_f__Ruminococcaceae	OTU1214	0	0	0	0	0	0	0	0	0	0	0	0	0	9	1	1	1	0	1
d__Bacteria	k__norank_d__Bacteria	p__Firmicutes	c__Clostridia	o__Clostridiales	f__Clostridiales_vadinBB60_group	g__norank_f__Clostridiales_vadinBB60_group	s__uncultured_bacterium_g__norank_f__Clostridiales_vadinBB60_group	OTU1215	0	0	0	0	0	0	0	0	0	0	0	0	1	0	0	0	0	0	0
d__Bacteria	k__norank_d__Bacteria	p__Bacteroidetes	c__Bacteroidia	o__Bacteroidales	f__Prevotellaceae	g__Prevotellaceae_UCG-003	s__unclassified_g__Prevotellaceae_UCG-003	OTU1216	0	0	0	0	0	0	0	0	0	0	0	0	0	86	0	5	0	0	2
d__Bacteria	k__norank_d__Bacteria	p__Bacteroidetes	c__Bacteroidia	o__Bacteroidales	f__Muribaculaceae	g__norank_f__Muribaculaceae	s__uncultured_bacterium_g__norank_f__Muribaculaceae	OTU1217	0	0	0	0	0	0	0	0	0	0	0	0	0	57	3	0	0	4	0
d__Bacteria	k__norank_d__Bacteria	p__Firmicutes	c__Clostridia	o__Clostridiales	f__Lachnospiraceae	g__Eubacterium]_ventriosum_group	s__uncultured_rumen_bacterium_g__Eubacterium]_ventriosum_group	OTU1218	0	0	0	0	0	0	0	0	0	0	0	0	2	20	4	3	8	1	2
d__Bacteria	k__norank_d__Bacteria	p__Firmicutes	c__Clostridia	o__Clostridiales	f__Lachnospiraceae	g__Anaerosporobacter	s__unclassified_g__Anaerosporobacter	OTU1219	0	0	0	0	0	0	0	0	0	0	0	0	0	14	0	0	10	0	0
d__Bacteria	k__norank_d__Bacteria	p__Actinobacteria	c__Actinobacteria	o__Streptosporangiales	f__Streptosporangiaceae	g__Thermopolyspora	s__uncultured_compost_bacterium_g__Thermopolyspora	OTU122	0	0	0	0	0	0	0	0	0	0	2	0	0	0	0	0	0	0	0
d__Bacteria	k__norank_d__Bacteria	p__Firmicutes	c__Clostridia	o__Clostridiales	f__Lachnospiraceae	g__unclassified_f__Lachnospiraceae	s__unclassified_f__Lachnospiraceae	OTU1220	0	0	0	0	0	0	0	0	0	0	0	0	4	44	1	3	34	3	32
d__Bacteria	k__norank_d__Bacteria	p__Tenericutes	c__Mollicutes	o__Mollicutes_RF39	f__norank_o__Mollicutes_RF39	g__norank_o__Mollicutes_RF39	s__uncultured_bacterium_g__norank_o__Mollicutes_RF39	OTU1221	0	0	0	0	0	0	0	0	0	0	0	0	0	2	0	0	4	0	1
d__Bacteria	k__norank_d__Bacteria	p__Firmicutes	c__Clostridia	o__Clostridiales	f__Ruminococcaceae	g__Ruminococcaceae_UCG-010	s__unclassified_g__Ruminococcaceae_UCG-010	OTU1222	0	0	0	0	0	0	0	0	0	0	0	0	0	2	0	0	0	0	0
d__Bacteria	k__norank_d__Bacteria	p__Firmicutes	c__Clostridia	o__Clostridiales	f__Peptococcaceae	g__norank_f__Peptococcaceae	s__uncultured_rumen_bacterium_g__norank_f__Peptococcaceae	OTU1223	0	0	0	0	0	0	0	0	0	0	0	0	0	2	0	0	2	0	0
d__Bacteria	k__norank_d__Bacteria	p__Firmicutes	c__Clostridia	o__Clostridiales	f__Ruminococcaceae	g__Candidatus_Soleaferrea	s__uncultured_bacterium_g__Candidatus_Soleaferrea	OTU1224	0	0	0	0	0	0	0	0	0	0	0	0	0	2	0	1	1	0	0
d__Bacteria	k__norank_d__Bacteria	p__Bacteroidetes	c__Bacteroidia	o__Bacteroidales	f__Prevotellaceae	g__Alloprevotella	s__uncultured_bacterium_g__Alloprevotella	OTU1225	0	0	0	0	0	0	0	0	0	0	0	0	73	598	82	99	309	485	94
d__Bacteria	k__norank_d__Bacteria	p__Firmicutes	c__Erysipelotrichia	o__Erysipelotrichales	f__Erysipelotrichaceae	g__Erysipelotrichaceae_UCG-004	s__unidentified_rumen_bacterium_RFN74	OTU1226	0	0	0	0	0	0	0	0	0	0	0	0	0	2	0	0	0	0	0
d__Bacteria	k__norank_d__Bacteria	p__Proteobacteria	c__Deltaproteobacteria	o__Bradymonadales	f__norank_o__Bradymonadales	g__norank_o__Bradymonadales	s__uncultured_rumen_bacterium_g__norank_o__Bradymonadales	OTU1227	0	0	0	0	0	0	0	0	0	0	0	0	0	25	0	1	0	0	2
d__Bacteria	k__norank_d__Bacteria	p__Firmicutes	c__Clostridia	o__Clostridiales	f__Ruminococcaceae	g__Ruminococcaceae_UCG-010	s__unclassified_g__Ruminococcaceae_UCG-010	OTU1228	0	0	0	0	0	0	0	0	0	0	0	0	0	13	2	0	3	0	0
d__Bacteria	k__norank_d__Bacteria	p__Bacteroidetes	c__Bacteroidia	o__Bacteroidales	f__Muribaculaceae	g__norank_f__Muribaculaceae	s__uncultured_bacterium_g__norank_f__Muribaculaceae	OTU1229	0	0	0	0	0	0	0	0	0	0	0	0	8	21	10	6	0	0	2
d__Bacteria	k__norank_d__Bacteria	p__Bacteroidetes	c__Bacteroidia	o__Bacteroidales	f__Prevotellaceae	g__unclassified_f__Prevotellaceae	s__unclassified_f__Prevotellaceae	OTU123	0	0	0	0	0	0	0	0	0	0	1	0	0	0	0	0	0	0	0
d__Bacteria	k__norank_d__Bacteria	p__Firmicutes	c__Clostridia	o__Clostridiales	f__Eubacteriaceae	g__Anaerofustis	s__Anaerofustis_sp._Marseille-P2441	OTU1230	0	0	0	0	0	0	0	0	0	0	0	0	2	1	0	0	0	0	0
d__Bacteria	k__norank_d__Bacteria	p__Firmicutes	c__Clostridia	o__Clostridiales	f__Ruminococcaceae	g__unclassified_f__Ruminococcaceae	s__unclassified_f__Ruminococcaceae	OTU1231	0	0	0	0	0	0	0	0	0	0	0	0	0	0	0	1	0	6	0
d__Bacteria	k__norank_d__Bacteria	p__Firmicutes	c__Clostridia	o__Clostridiales	f__Lachnospiraceae	g__Eubacterium]_ruminantium_group	s__uncultured_bacterium_g__Eubacterium]_ruminantium_group	OTU1233	0	0	0	0	0	0	0	0	0	0	0	0	0	5	0	0	0	0	0
d__Bacteria	k__norank_d__Bacteria	p__Bacteroidetes	c__Bacteroidia	o__Bacteroidales	f__Muribaculaceae	g__norank_f__Muribaculaceae	s__uncultured_bacterium_g__norank_f__Muribaculaceae	OTU1234	0	0	0	0	0	0	0	0	0	0	0	0	0	51	0	10	0	1	0
d__Bacteria	k__norank_d__Bacteria	p__Firmicutes	c__Erysipelotrichia	o__Erysipelotrichales	f__Erysipelotrichaceae	g__Candidatus_Stoquefichus	s__unclassified_g__Candidatus_Stoquefichus	OTU1235	0	0	0	0	0	0	0	0	0	0	0	0	0	12	0	0	1	0	0
d__Bacteria	k__norank_d__Bacteria	p__Firmicutes	c__Clostridia	o__Clostridiales	f__Ruminococcaceae	g__unclassified_f__Ruminococcaceae	s__unclassified_f__Ruminococcaceae	OTU1236	0	0	0	0	0	0	0	0	0	0	0	0	0	1	0	0	0	0	0
d__Bacteria	k__norank_d__Bacteria	p__Firmicutes	c__Clostridia	o__Clostridiales	f__Lachnospiraceae	g__Acetitomaculum	s__uncultured_bacterium_g__Acetitomaculum	OTU1237	0	0	0	0	0	0	0	0	0	0	0	0	0	59	0	0	37	1	1
d__Bacteria	k__norank_d__Bacteria	p__Firmicutes	c__Clostridia	o__Clostridiales	f__Ruminococcaceae	g__Ruminococcaceae_UCG-004	s__uncultured_bacterium_g__Ruminococcaceae_UCG-004	OTU1238	6	1	0	3	0	1	0	1	0	1	0	11	0	1	0	1	0	0	0
d__Bacteria	k__norank_d__Bacteria	p__Firmicutes	c__Clostridia	o__Clostridiales	f__Ruminococcaceae	g__Candidatus_Soleaferrea	s__uncultured_bacterium_g__Candidatus_Soleaferrea	OTU1239	0	0	0	0	0	0	0	0	0	0	0	0	2	151	5	50	8	2	3
d__Bacteria	k__norank_d__Bacteria	p__Cyanobacteria	c__Oxyphotobacteria	o__Nostocales	f__Chroococcidiopsaceae	g__Chroococcidiopsis_SAG_2023	s__uncultured_bacterium_g__Chroococcidiopsis_SAG_2023	OTU124	0	0	0	0	0	0	0	0	5	0	1	0	0	0	0	0	0	0	0
d__Bacteria	k__norank_d__Bacteria	p__Firmicutes	c__Clostridia	o__Clostridiales	f__Ruminococcaceae	g__Ruminococcaceae_UCG-013	s__uncultured_bacterium_g__Ruminococcaceae_UCG-013	OTU1240	0	0	0	0	0	0	0	0	0	0	0	0	5	50	3	6	13	0	5
d__Bacteria	k__norank_d__Bacteria	p__Firmicutes	c__Clostridia	o__Clostridiales	f__Ruminococcaceae	g__Ruminococcaceae_UCG-010	s__unclassified_g__Ruminococcaceae_UCG-010	OTU1241	0	0	0	0	0	0	0	0	0	0	0	0	0	2	0	0	2	0	0
d__Bacteria	k__norank_d__Bacteria	p__Firmicutes	c__Clostridia	o__Clostridiales	f__Ruminococcaceae	g__Ruminococcaceae_UCG-013	s__uncultured_bacterium_g__Ruminococcaceae_UCG-013	OTU1242	0	0	0	0	0	0	0	0	0	0	0	0	0	5	0	0	1	0	0
d__Bacteria	k__norank_d__Bacteria	p__Bacteroidetes	c__Bacteroidia	o__Bacteroidales	f__Muribaculaceae	g__norank_f__Muribaculaceae	s__uncultured_bacterium_g__norank_f__Muribaculaceae	OTU1243	0	0	0	0	0	0	0	0	0	0	0	0	0	75	2	0	2	6	7
d__Bacteria	k__norank_d__Bacteria	p__Firmicutes	c__Clostridia	o__Clostridiales	f__Christensenellaceae	g__Christensenellaceae_R-7_group	s__uncultured_bacterium_g__Christensenellaceae_R-7_group	OTU1244	0	0	0	0	0	0	0	0	0	0	0	0	0	11	0	1	3	0	1
d__Bacteria	k__norank_d__Bacteria	p__Firmicutes	c__Clostridia	o__Clostridiales	f__Ruminococcaceae	g__norank_f__Ruminococcaceae	s__gut_metagenome_g__norank_f__Ruminococcaceae	OTU1245	0	0	0	0	0	0	0	0	0	0	0	0	17	125	17	61	30	28	6
d__Bacteria	k__norank_d__Bacteria	p__Firmicutes	c__Clostridia	o__Clostridiales	f__Ruminococcaceae	g__Ruminococcaceae_UCG-013	s__unclassified_g__Ruminococcaceae_UCG-013	OTU1246	0	0	0	0	0	0	0	0	0	0	0	0	0	25	0	0	8	0	0
d__Bacteria	k__norank_d__Bacteria	p__Firmicutes	c__Clostridia	o__Clostridiales	f__Ruminococcaceae	g__Ruminococcus_2	s__uncultured_bacterium_g__Ruminococcus_2	OTU1247	2	0	0	0	0	0	0	0	0	0	0	0	22	226	88	15	101	35	87
d__Bacteria	k__norank_d__Bacteria	p__Cyanobacteria	c__Melainabacteria	o__Gastranaerophilales	f__norank_o__Gastranaerophilales	g__norank_o__Gastranaerophilales	s__uncultured_rumen_bacterium_g__norank_o__Gastranaerophilales	OTU1248	1	0	0	0	0	0	0	0	0	0	0	0	1	2	3	1	3	2	1
d__Bacteria	k__norank_d__Bacteria	p__Firmicutes	c__Clostridia	o__Clostridiales	f__Family_XIII	g__Eubacterium]_nodatum_group	s__uncultured_bacterium_g__Eubacterium]_nodatum_group	OTU1249	0	0	0	0	0	0	0	0	0	0	0	0	3	45	6	8	8	3	4
d__Bacteria	k__norank_d__Bacteria	p__Proteobacteria	c__Alphaproteobacteria	o__Rickettsiales	f__Mitochondria	g__norank_f__Mitochondria	s__unclassified_g__norank_f__Mitochondria	OTU125	0	0	0	0	0	0	0	0	1	0	0	0	0	0	0	0	0	0	0
d__Bacteria	k__norank_d__Bacteria	p__Firmicutes	c__Clostridia	o__Clostridiales	f__Christensenellaceae	g__norank_f__Christensenellaceae	s__unclassified_g__norank_f__Christensenellaceae	OTU1250	0	0	0	0	0	0	0	0	0	0	0	0	0	5	1	0	1	0	0
d__Bacteria	k__norank_d__Bacteria	p__Firmicutes	c__Clostridia	o__Clostridiales	f__Lachnospiraceae	g__Tyzzerella_3	s__uncultured_bacterium_g__Tyzzerella_3	OTU1251	0	0	0	0	0	0	0	0	0	0	0	0	0	6	1	0	2	0	0
d__Bacteria	k__norank_d__Bacteria	p__Firmicutes	c__Clostridia	o__Clostridiales	f__Christensenellaceae	g__Christensenellaceae_R-7_group	s__uncultured_marine_bacterium_g__Christensenellaceae_R-7_group	OTU1252	0	0	0	0	0	0	0	0	0	0	0	0	0	1	0	0	0	0	0
d__Bacteria	k__norank_d__Bacteria	p__Firmicutes	c__Clostridia	o__Clostridiales	f__Christensenellaceae	g__norank_f__Christensenellaceae	s__uncultured_bacterium_g__norank_f__Christensenellaceae	OTU1253	0	0	0	0	0	0	0	0	0	0	0	0	0	3	1	0	0	0	0
d__Bacteria	k__norank_d__Bacteria	p__Firmicutes	c__Clostridia	o__Clostridiales	f__Ruminococcaceae	g__unclassified_f__Ruminococcaceae	s__unclassified_f__Ruminococcaceae	OTU1254	3	0	1	0	0	0	0	0	0	0	0	0	10	74	7	13	37	11	3
d__Bacteria	k__norank_d__Bacteria	p__Firmicutes	c__Clostridia	o__Clostridiales	f__Christensenellaceae	g__Christensenellaceae_R-7_group	s__unclassified_g__Christensenellaceae_R-7_group	OTU1255	0	0	0	0	0	0	0	0	0	0	0	0	14	417	14	10	66	6	20
d__Bacteria	k__norank_d__Bacteria	p__Firmicutes	c__Clostridia	o__Clostridiales	f__Christensenellaceae	g__Christensenellaceae_R-7_group	s__unclassified_g__Christensenellaceae_R-7_group	OTU1256	0	0	0	0	0	0	0	0	0	0	0	0	1	6	3	3	1	4	0
d__Bacteria	k__norank_d__Bacteria	p__Firmicutes	c__Clostridia	o__Clostridiales	f__Christensenellaceae	g__Christensenellaceae_R-7_group	s__uncultured_bacterium_g__Christensenellaceae_R-7_group	OTU1257	0	0	0	0	0	0	0	0	0	0	0	0	10	11	0	1	0	4	0
d__Bacteria	k__norank_d__Bacteria	p__Firmicutes	c__Clostridia	o__Clostridiales	f__Christensenellaceae	g__Christensenellaceae_R-7_group	s__unclassified_g__Christensenellaceae_R-7_group	OTU1258	0	0	0	0	0	0	0	0	0	0	0	0	0	32	2	0	5	1	3
d__Bacteria	k__norank_d__Bacteria	p__Firmicutes	c__Clostridia	o__Clostridiales	f__Christensenellaceae	g__Christensenellaceae_R-7_group	s__uncultured_bacterium_g__Christensenellaceae_R-7_group	OTU1259	0	0	0	0	0	0	0	0	0	0	0	0	0	1	0	0	0	0	0
d__Bacteria	k__norank_d__Bacteria	p__Cyanobacteria	c__Oxyphotobacteria	o__Chloroplast	f__norank_o__Chloroplast	g__norank_o__Chloroplast	s__unclassified_g__norank_o__Chloroplast	OTU126	12	1	1	3	9	4	9	4	4	4	1	8	1	0	0	0	0	0	0
d__Bacteria	k__norank_d__Bacteria	p__Firmicutes	c__Clostridia	o__Clostridiales	f__Ruminococcaceae	g__Ruminococcaceae_NK4A214_group	s__metagenome_g__Ruminococcaceae_NK4A214_group	OTU1260	0	0	0	0	0	0	0	0	0	0	0	0	12	488	30	91	57	66	3
d__Bacteria	k__norank_d__Bacteria	p__Actinobacteria	c__Actinobacteria	o__Coriobacteriales	f__Eggerthellaceae	g__norank_f__Eggerthellaceae	s__uncultured_bacterium_g__norank_f__Eggerthellaceae	OTU1261	0	0	0	0	0	0	0	0	0	0	0	0	0	6	0	0	0	0	1
d__Bacteria	k__norank_d__Bacteria	p__Firmicutes	c__Clostridia	o__Clostridiales	f__Family_XIII	g__Family_XIII_AD3011_group	s__uncultured_bacterium_g__Family_XIII_AD3011_group	OTU1262	0	0	0	0	0	0	0	0	0	0	0	0	0	7	0	0	4	0	0
d__Bacteria	k__norank_d__Bacteria	p__Firmicutes	c__Clostridia	o__Clostridiales	f__Ruminococcaceae	g__Eubacterium]_coprostanoligenes_group	s__unclassified_g__Eubacterium]_coprostanoligenes_group	OTU1263	0	0	0	0	0	0	0	1	0	0	0	0	81	78	63	83	30	56	65
d__Bacteria	k__norank_d__Bacteria	p__Firmicutes	c__Clostridia	o__Clostridiales	f__Ruminococcaceae	g__Ruminococcaceae_UCG-014	s__uncultured_Ruminococcaceae_bacterium_g__Ruminococcaceae_UCG-014	OTU1264	0	0	1	0	0	0	0	0	0	0	0	0	169	425	299	317	169	123	22
d__Bacteria	k__norank_d__Bacteria	p__Cyanobacteria	c__Melainabacteria	o__Gastranaerophilales	f__norank_o__Gastranaerophilales	g__norank_o__Gastranaerophilales	s__unclassified_g__norank_o__Gastranaerophilales	OTU1265	0	0	0	0	0	0	0	0	0	0	0	0	0	20	0	0	3	0	1
d__Bacteria	k__norank_d__Bacteria	p__Firmicutes	c__Clostridia	o__Clostridiales	f__Ruminococcaceae	g__Ruminococcaceae_UCG-010	s__metagenome_g__Ruminococcaceae_UCG-010	OTU1266	0	0	0	0	0	0	0	0	0	0	0	0	4	26	2	7	4	2	1
d__Bacteria	k__norank_d__Bacteria	p__Firmicutes	c__Clostridia	o__Clostridiales	f__Family_XIII	g__Family_XIII_UCG-001	s__uncultured_bacterium_g__Family_XIII_UCG-001	OTU1267	1	0	0	0	0	0	0	0	0	0	0	1	2	34	0	0	7	1	2
d__Bacteria	k__norank_d__Bacteria	p__Firmicutes	c__Clostridia	o__Clostridiales	f__Ruminococcaceae	g__Eubacterium]_coprostanoligenes_group	s__uncultured_bacterium_g__Eubacterium]_coprostanoligenes_group	OTU1268	0	0	0	0	0	0	0	0	0	0	0	0	14	221	22	41	36	23	1
d__Bacteria	k__norank_d__Bacteria	p__Firmicutes	c__Clostridia	o__Clostridiales	f__Ruminococcaceae	g__Eubacterium]_coprostanoligenes_group	s__unclassified_g__Eubacterium]_coprostanoligenes_group	OTU1269	3	0	0	0	0	0	0	0	1	1	0	0	67	105	5	30	20	17	21
d__Bacteria	k__norank_d__Bacteria	p__Proteobacteria	c__Alphaproteobacteria	o__Rhizobiales	f__Rhizobiales_Incertae_Sedis	g__Phreatobacter	s__uncultured_bacterium_g__Phreatobacter	OTU127	0	0	0	0	0	0	0	0	1	0	1	0	0	0	0	0	0	0	0
d__Bacteria	k__norank_d__Bacteria	p__Firmicutes	c__Clostridia	o__Clostridiales	f__Ruminococcaceae	g__Candidatus_Soleaferrea	s__uncultured_bacterium_g__Candidatus_Soleaferrea	OTU1270	0	0	0	0	0	0	0	0	0	0	0	0	0	3	1	0	0	0	0
d__Bacteria	k__norank_d__Bacteria	p__Firmicutes	c__Negativicutes	o__Selenomonadales	f__Veillonellaceae	g__Anaerovibrio	s__uncultured_bacterium_g__Anaerovibrio	OTU1271	0	0	0	0	0	0	0	0	0	0	0	0	5	23	15	9	17	12	5
d__Bacteria	k__norank_d__Bacteria	p__Spirochaetes	c__Spirochaetia	o__Spirochaetales	f__Spirochaetaceae	g__Sphaerochaeta	s__uncultured_bacterium_g__Sphaerochaeta	OTU1272	0	0	0	0	0	0	0	0	0	0	0	0	3	4	1	2	19	3	1
d__Bacteria	k__norank_d__Bacteria	p__Firmicutes	c__Negativicutes	o__Selenomonadales	f__Acidaminococcaceae	g__Phascolarctobacterium	s__unclassified_g__Phascolarctobacterium	OTU1273	0	0	0	0	0	0	2	0	0	0	0	0	62	455	398	229	720	42	510
d__Bacteria	k__norank_d__Bacteria	p__Firmicutes	c__Clostridia	o__Clostridiales	f__Lachnospiraceae	g__Blautia	s__Ruminococcus_sp._5_1_39BFAA	OTU1274	0	0	0	0	0	0	0	0	0	0	1	0	516	334	146	118	80	158	144
d__Bacteria	k__norank_d__Bacteria	p__Firmicutes	c__Clostridia	o__Clostridiales	f__Family_XIII	g__Family_XIII_AD3011_group	s__unclassified_g__Family_XIII_AD3011_group	OTU1275	0	0	0	0	0	0	0	0	0	0	0	0	0	7	0	0	6	1	0
d__Bacteria	k__norank_d__Bacteria	p__Actinobacteria	c__Actinobacteria	o__Coriobacteriales	f__Eggerthellaceae	g__norank_f__Eggerthellaceae	s__uncultured_bacterium_g__norank_f__Eggerthellaceae	OTU1276	0	0	0	0	0	0	0	0	0	0	0	0	0	8	0	0	1	1	0
d__Bacteria	k__norank_d__Bacteria	p__Firmicutes	c__Clostridia	o__Clostridiales	f__Ruminococcaceae	g__Ruminiclostridium	s__uncultured_bacterium_g__Ruminiclostridium	OTU1277	0	0	0	0	0	0	0	0	0	0	0	0	0	4	0	0	0	2	0
d__Bacteria	k__norank_d__Bacteria	p__Bacteroidetes	c__Bacteroidia	o__Bacteroidales	f__Prevotellaceae	g__Prevotella_2	s__uncultured_bacterium_g__Prevotella_2	OTU1278	0	0	0	0	0	0	0	0	0	0	0	0	21	384	151	86	37	511	2059
d__Bacteria	k__norank_d__Bacteria	p__Firmicutes	c__Clostridia	o__Clostridiales	f__Ruminococcaceae	g__Ruminococcus_1	s__unclassified_g__Ruminococcus_1	OTU1279	0	0	0	0	0	1	0	0	0	0	0	0	0	56	1	9	108	6	0
d__Bacteria	k__norank_d__Bacteria	p__Actinobacteria	c__Actinobacteria	o__Propionibacteriales	f__Propionibacteriaceae	g__Cutibacterium	s__Cutibacterium_granulosum	OTU128	0	0	0	0	0	0	0	0	2	0	0	1	0	0	0	0	0	0	0
d__Bacteria	k__norank_d__Bacteria	p__Bacteroidetes	c__Bacteroidia	o__Bacteroidales	f__Muribaculaceae	g__norank_f__Muribaculaceae	s__unclassified_g__norank_f__Muribaculaceae	OTU1280	0	0	0	0	0	0	0	0	0	0	0	0	0	43	0	0	14	0	1
d__Bacteria	k__norank_d__Bacteria	p__Firmicutes	c__Erysipelotrichia	o__Erysipelotrichales	f__Erysipelotrichaceae	g__Solobacterium	s__uncultured_Bulleidia_sp._g__Solobacterium	OTU1282	0	0	0	0	0	0	0	0	0	0	0	0	55	278	51	36	53	88	51
d__Bacteria	k__norank_d__Bacteria	p__Bacteroidetes	c__Bacteroidia	o__Bacteroidales	f__Muribaculaceae	g__norank_f__Muribaculaceae	s__unclassified_g__norank_f__Muribaculaceae	OTU1283	0	0	0	0	0	0	0	0	0	0	0	0	14	12	19	27	2	21	16
d__Bacteria	k__norank_d__Bacteria	p__Firmicutes	c__Clostridia	o__Clostridiales	f__Ruminococcaceae	g__Ruminiclostridium_9	s__unclassified_g__Ruminiclostridium_9	OTU1284	8	0	0	0	0	0	0	0	0	0	0	0	1	20	1	0	7	2	1
d__Bacteria	k__norank_d__Bacteria	p__Bacteroidetes	c__Bacteroidia	o__Bacteroidales	f__Prevotellaceae	g__Prevotellaceae_UCG-003	s__uncultured_bacterium_g__Prevotellaceae_UCG-003	OTU1285	0	0	0	0	0	0	0	0	0	0	0	0	0	40	1	0	10	0	9
d__Bacteria	k__norank_d__Bacteria	p__Firmicutes	c__Clostridia	o__Clostridiales	f__Ruminococcaceae	g__Ruminococcaceae_UCG-002	s__uncultured_bacterium_g__Ruminococcaceae_UCG-002	OTU1286	0	0	0	0	0	0	0	0	0	0	0	0	88	813	122	230	156	354	75
d__Bacteria	k__norank_d__Bacteria	p__Firmicutes	c__Clostridia	o__Clostridiales	f__Ruminococcaceae	g__unclassified_f__Ruminococcaceae	s__unclassified_f__Ruminococcaceae	OTU1287	0	0	0	0	0	0	0	0	0	0	0	0	0	2	0	0	0	0	0
d__Bacteria	k__norank_d__Bacteria	p__Bacteroidetes	c__Bacteroidia	o__Bacteroidales	f__Bacteroidales_RF16_group	g__norank_f__Bacteroidales_RF16_group	s__uncultured_rumen_bacterium_g__norank_f__Bacteroidales_RF16_group	OTU1288	0	0	0	0	0	0	0	0	0	0	0	0	0	133	0	0	3	0	0
d__Bacteria	k__norank_d__Bacteria	p__Bacteroidetes	c__Bacteroidia	o__Bacteroidales	f__Prevotellaceae	g__Alloprevotella	s__uncultured_bacterium_g__Alloprevotella	OTU1289	0	0	0	0	0	0	0	0	0	0	0	0	7	60	9	26	13	4	26
d__Bacteria	k__norank_d__Bacteria	p__Cyanobacteria	c__Oxyphotobacteria	o__Nostocales	f__Nostocaceae	g__Calothrix_PCC-6303	s__unclassified_g__Calothrix_PCC-6303	OTU129	0	0	0	0	0	0	0	0	8	0	0	0	0	0	0	0	0	0	0
d__Bacteria	k__norank_d__Bacteria	p__Firmicutes	c__Clostridia	o__Clostridiales	f__Ruminococcaceae	g__Ruminococcaceae_UCG-013	s__uncultured_bacterium_g__Ruminococcaceae_UCG-013	OTU1290	0	0	0	0	0	0	0	0	0	0	0	0	2	2	2	1	0	3	0
d__Bacteria	k__norank_d__Bacteria	p__Actinobacteria	c__Actinobacteria	o__Coriobacteriales	f__Eggerthellaceae	g__Paraeggerthella	s__unclassified_g__Paraeggerthella	OTU1291	0	0	0	0	0	0	0	0	0	0	0	0	0	2	0	1	0	0	0
d__Bacteria	k__norank_d__Bacteria	p__Bacteroidetes	c__Bacteroidia	o__Bacteroidales	f__Prevotellaceae	g__unclassified_f__Prevotellaceae	s__unclassified_f__Prevotellaceae	OTU1292	0	0	0	0	0	0	0	0	0	0	0	0	0	26	0	0	2	4	0
d__Bacteria	k__norank_d__Bacteria	p__Bacteroidetes	c__Bacteroidia	o__Bacteroidales	f__Bacteroidaceae	g__Bacteroides	s__unclassified_g__Bacteroides	OTU1293	0	0	0	0	0	0	0	0	0	0	0	0	0	2	0	0	5	0	0
d__Bacteria	k__norank_d__Bacteria	p__Firmicutes	c__Clostridia	o__Clostridiales	f__Ruminococcaceae	g__unclassified_f__Ruminococcaceae	s__unclassified_f__Ruminococcaceae	OTU1294	0	0	0	0	0	0	0	0	0	0	0	0	0	2	0	0	0	0	0
d__Bacteria	k__norank_d__Bacteria	p__Firmicutes	c__Clostridia	o__Clostridiales	f__Ruminococcaceae	g__Ruminococcaceae_UCG-005	s__unclassified_g__Ruminococcaceae_UCG-005	OTU1295	0	0	0	0	0	0	0	0	0	0	0	0	0	2	0	0	0	0	0
d__Bacteria	k__norank_d__Bacteria	p__Firmicutes	c__Clostridia	o__Clostridiales	f__Ruminococcaceae	g__Ruminococcus_1	s__uncultured_Ruminococcus_sp._g__Ruminococcus_1	OTU1296	7	0	0	0	0	0	0	0	0	0	0	0	0	158	5	21	123	9	8
d__Bacteria	k__norank_d__Bacteria	p__Tenericutes	c__Mollicutes	o__Mollicutes_RF39	f__norank_o__Mollicutes_RF39	g__norank_o__Mollicutes_RF39	s__uncultured_rumen_bacterium_g__norank_o__Mollicutes_RF39	OTU1297	0	0	0	0	0	0	0	0	0	0	0	0	0	5	0	0	0	0	0
d__Bacteria	k__norank_d__Bacteria	p__Firmicutes	c__Clostridia	o__Clostridiales	f__unclassified_o__Clostridiales	g__unclassified_o__Clostridiales	s__unclassified_o__Clostridiales	OTU1298	0	0	0	0	0	0	0	0	0	0	0	0	0	14	0	0	3	0	0
d__Bacteria	k__norank_d__Bacteria	p__Firmicutes	c__Clostridia	o__Clostridiales	f__Ruminococcaceae	g__Ruminiclostridium	s__uncultured_bacterium_g__Ruminiclostridium	OTU1299	0	0	0	0	0	0	0	0	0	0	0	0	0	15	0	1	5	3	0
d__Bacteria	k__norank_d__Bacteria	p__Firmicutes	c__Clostridia	o__Clostridiales	f__Clostridiaceae_1	g__Clostridium_sensu_stricto_11	s__Clostridium_acetobutylicum_ATCC_824	OTU13	0	0	0	0	0	0	1	0	0	0	0	0	0	0	0	0	0	0	0
d__Bacteria	k__norank_d__Bacteria	p__Epsilonbacteraeota	c__Campylobacteria	o__Campylobacterales	f__Campylobacteraceae	g__Campylobacter	s__Campylobacter_showae	OTU130	0	0	0	0	0	0	0	0	2	0	1	0	0	0	0	0	0	0	0
d__Bacteria	k__norank_d__Bacteria	p__Bacteroidetes	c__Bacteroidia	o__Bacteroidales	f__Tannerellaceae	g__Parabacteroides	s__Parabacteroides_sp._SN4	OTU1300	0	0	0	0	0	0	0	0	0	0	0	0	1	1	1	0	1	0	0
d__Bacteria	k__norank_d__Bacteria	p__Firmicutes	c__Erysipelotrichia	o__Erysipelotrichales	f__Erysipelotrichaceae	g__Erysipelotrichaceae_UCG-004	s__uncultured_bacterium_g__Erysipelotrichaceae_UCG-004	OTU1301	0	0	0	0	0	0	0	0	0	0	0	0	0	4	0	0	1	0	1
d__Bacteria	k__norank_d__Bacteria	p__Bacteroidetes	c__Bacteroidia	o__Bacteroidales	f__Muribaculaceae	g__norank_f__Muribaculaceae	s__uncultured_bacterium_g__norank_f__Muribaculaceae	OTU1302	0	0	0	0	0	0	0	0	0	0	0	0	1	7	11	3	0	4	9
d__Bacteria	k__norank_d__Bacteria	p__Firmicutes	c__Erysipelotrichia	o__Erysipelotrichales	f__Erysipelotrichaceae	g__Erysipelotrichaceae_UCG-006	s__uncultured_bacterium_g__Erysipelotrichaceae_UCG-006	OTU1303	0	0	0	0	0	0	0	0	0	0	0	0	7	9	8	3	8	16	11
d__Bacteria	k__norank_d__Bacteria	p__Firmicutes	c__Clostridia	o__Clostridiales	f__Ruminococcaceae	g__Eubacterium]_coprostanoligenes_group	s__unclassified_g__Eubacterium]_coprostanoligenes_group	OTU1304	0	2	0	0	0	0	0	0	0	0	0	3	2	35	30	42	12	3	2
d__Bacteria	k__norank_d__Bacteria	p__Firmicutes	c__Clostridia	o__Clostridiales	f__Ruminococcaceae	g__Ruminococcaceae_UCG-013	s__uncultured_rumen_bacterium_4C28d-12	OTU1305	0	0	0	0	0	0	0	0	0	0	0	0	2	8	4	2	1	1	0
d__Bacteria	k__norank_d__Bacteria	p__Bacteroidetes	c__Bacteroidia	o__Bacteroidales	f__Muribaculaceae	g__norank_f__Muribaculaceae	s__uncultured_bacterium_g__norank_f__Muribaculaceae	OTU1306	0	0	0	0	0	0	0	0	0	0	0	0	0	12	1	0	0	2	0
d__Bacteria	k__norank_d__Bacteria	p__Firmicutes	c__Clostridia	o__Clostridiales	f__Ruminococcaceae	g__Ruminococcaceae_UCG-009	s__uncultured_bacterium_g__Ruminococcaceae_UCG-009	OTU1307	0	0	1	0	0	0	0	0	0	0	0	0	0	1	0	1	0	2	1
d__Bacteria	k__norank_d__Bacteria	p__Firmicutes	c__Clostridia	o__Clostridiales	f__Ruminococcaceae	g__unclassified_f__Ruminococcaceae	s__unclassified_f__Ruminococcaceae	OTU1308	0	0	0	0	0	0	0	0	0	0	0	0	0	14	1	1	1	8	2
d__Bacteria	k__norank_d__Bacteria	p__Bacteroidetes	c__Bacteroidia	o__Bacteroidales	f__Bacteroidaceae	g__Bacteroides	s__unclassified_g__Bacteroides	OTU1309	0	0	0	0	0	0	0	0	0	0	0	0	0	31	0	0	38	2	2
d__Bacteria	k__norank_d__Bacteria	p__Acidobacteria	c__Acidobacteriia	o__Acidobacteriales	f__Acidobacteriaceae_Subgroup_1	g__Granulicella	s__metagenome_g__Granulicella	OTU131	0	0	0	0	0	0	0	0	2	0	0	0	0	0	0	0	0	0	0
d__Bacteria	k__norank_d__Bacteria	p__Firmicutes	c__Clostridia	o__Clostridiales	f__Lachnospiraceae	g__Roseburia	s__unclassified_g__Roseburia	OTU1310	0	0	0	0	0	0	0	0	0	0	0	0	0	7	1	0	1	1	1
d__Bacteria	k__norank_d__Bacteria	p__Firmicutes	c__Clostridia	o__Clostridiales	f__Ruminococcaceae	g__Ruminococcaceae_UCG-005	s__uncultured_rumen_bacterium_g__Ruminococcaceae_UCG-005	OTU1311	0	0	0	0	0	0	0	0	0	0	0	0	0	4	1	0	5	1	0
d__Bacteria	k__norank_d__Bacteria	p__Bacteroidetes	c__Bacteroidia	o__Bacteroidales	f__Prevotellaceae	g__unclassified_f__Prevotellaceae	s__unclassified_f__Prevotellaceae	OTU1312	0	0	0	0	0	0	0	0	0	0	0	0	2	5	3	2	0	0	0
d__Bacteria	k__norank_d__Bacteria	p__Firmicutes	c__Erysipelotrichia	o__Erysipelotrichales	f__Erysipelotrichaceae	g__norank_f__Erysipelotrichaceae	s__uncultured_bacterium_g__norank_f__Erysipelotrichaceae	OTU1313	0	0	0	0	0	0	0	0	0	0	0	0	0	1	0	0	1	0	0
d__Bacteria	k__norank_d__Bacteria	p__Firmicutes	c__Clostridia	o__Clostridiales	f__Lachnospiraceae	g__Lachnospiraceae_NK4A136_group	s__unclassified_g__Lachnospiraceae_NK4A136_group	OTU1314	0	0	0	0	0	0	0	0	0	0	0	0	1	30	17	34	11	8	1
d__Bacteria	k__norank_d__Bacteria	p__Firmicutes	c__Erysipelotrichia	o__Erysipelotrichales	f__Erysipelotrichaceae	g__norank_f__Erysipelotrichaceae	s__uncultured_bacterium_g__norank_f__Erysipelotrichaceae	OTU1315	0	0	0	0	0	0	0	0	0	0	0	0	0	18	0	1	2	0	0
d__Bacteria	k__norank_d__Bacteria	p__Bacteroidetes	c__Bacteroidia	o__Bacteroidales	f__Prevotellaceae	g__Prevotella_1	s__unclassified_g__Prevotella_1	OTU1316	0	0	0	0	0	0	0	0	0	0	0	0	73	247	75	62	165	89	35
d__Bacteria	k__norank_d__Bacteria	p__Firmicutes	c__Negativicutes	o__Selenomonadales	f__Veillonellaceae	g__Anaerovibrio	s__unclassified_g__Anaerovibrio	OTU1317	0	0	0	0	0	0	0	0	0	0	0	0	0	1	0	0	1	0	0
d__Bacteria	k__norank_d__Bacteria	p__Bacteroidetes	c__Bacteroidia	o__Bacteroidales	f__Rikenellaceae	g__Rikenellaceae_RC9_gut_group	s__uncultured_bacterium_g__Rikenellaceae_RC9_gut_group	OTU1318	0	0	0	0	0	0	0	0	0	0	0	0	0	7	2	0	1	1	0
d__Bacteria	k__norank_d__Bacteria	p__Bacteroidetes	c__Bacteroidia	o__Bacteroidales	f__Prevotellaceae	g__Prevotellaceae_NK3B31_group	s__uncultured_bacterium_g__Prevotellaceae_NK3B31_group	OTU1319	0	0	0	0	0	0	0	0	0	0	0	0	23	82	22	103	507	82	54
d__Bacteria	k__norank_d__Bacteria	p__Actinobacteria	c__Actinobacteria	o__Gaiellales	f__norank_o__Gaiellales	g__norank_o__Gaiellales	s__unclassified_g__norank_o__Gaiellales	OTU132	0	0	0	0	0	0	1	0	2	0	2	0	0	0	0	0	0	0	0
d__Bacteria	k__norank_d__Bacteria	p__Firmicutes	c__Negativicutes	o__Selenomonadales	f__Veillonellaceae	g__Anaerovibrio	s__uncultured_rumen_bacterium_g__Anaerovibrio	OTU1320	0	0	0	0	0	0	0	0	0	0	0	0	0	196	76	0	1	30	253
d__Bacteria	k__norank_d__Bacteria	p__Bacteroidetes	c__Bacteroidia	o__Bacteroidales	f__Prevotellaceae	g__Prevotellaceae_NK3B31_group	s__uncultured_Prevotella_sp._g__Prevotellaceae_NK3B31_group	OTU1321	1	0	0	1	0	0	0	0	0	0	0	0	65	1610	227	197	3661	172	297
d__Bacteria	k__norank_d__Bacteria	p__Bacteroidetes	c__Bacteroidia	o__Bacteroidales	f__Prevotellaceae	g__Prevotellaceae_NK3B31_group	s__uncultured_bacterium_g__Prevotellaceae_NK3B31_group	OTU1322	0	0	0	0	0	0	0	0	0	0	0	0	3	1039	44	37	156	7	31
d__Bacteria	k__norank_d__Bacteria	p__Bacteroidetes	c__Bacteroidia	o__Bacteroidales	f__Rikenellaceae	g__Rikenellaceae_RC9_gut_group	s__uncultured_bacterium_g__Rikenellaceae_RC9_gut_group	OTU1323	0	0	0	0	0	0	0	0	0	0	0	0	23	311	42	25	122	85	28
d__Bacteria	k__norank_d__Bacteria	p__Bacteroidetes	c__Bacteroidia	o__Bacteroidales	f__Prevotellaceae	g__Prevotellaceae_UCG-003	s__unclassified_g__Prevotellaceae_UCG-003	OTU1324	0	0	0	0	0	0	0	0	0	0	0	0	0	10	0	0	1	0	3
d__Bacteria	k__norank_d__Bacteria	p__Bacteroidetes	c__Bacteroidia	o__Bacteroidales	f__Prevotellaceae	g__Alloprevotella	s__unclassified_g__Alloprevotella	OTU1325	0	0	0	0	0	0	0	0	0	0	1	0	2	67	25	0	11	2	32
d__Bacteria	k__norank_d__Bacteria	p__Firmicutes	c__Clostridia	o__Clostridiales	f__Ruminococcaceae	g__norank_f__Ruminococcaceae	s__uncultured_Clostridium_sp._g__norank_f__Ruminococcaceae	OTU1326	0	0	0	0	0	0	0	0	0	0	0	0	0	3	0	0	0	0	0
d__Bacteria	k__norank_d__Bacteria	p__Bacteroidetes	c__Bacteroidia	o__Bacteroidales	f__Tannerellaceae	g__Parabacteroides	s__Porphyromonadaceae_bacterium_DJF_B175	OTU1327	0	0	0	0	0	0	0	0	0	0	0	0	8	53	42	7	70	24	47
d__Bacteria	k__norank_d__Bacteria	p__Firmicutes	c__Erysipelotrichia	o__Erysipelotrichales	f__Erysipelotrichaceae	g__Erysipelotrichaceae_UCG-004	s__uncultured_bacterium_g__Erysipelotrichaceae_UCG-004	OTU1328	0	0	0	0	0	0	0	0	0	0	0	0	0	0	0	1	0	1	1
d__Bacteria	k__norank_d__Bacteria	p__Bacteroidetes	c__Bacteroidia	o__Bacteroidales	f__Muribaculaceae	g__norank_f__Muribaculaceae	s__uncultured_bacterium_g__norank_f__Muribaculaceae	OTU1329	0	0	0	0	0	0	0	0	0	0	0	0	5	26	7	3	1	7	1
d__Bacteria	k__norank_d__Bacteria	p__Bacteroidetes	c__Bacteroidia	o__Flavobacteriales	f__Weeksellaceae	g__Chryseobacterium	s__unclassified_g__Chryseobacterium	OTU133	1	0	0	0	0	0	0	0	1	0	1	0	0	0	0	0	0	0	0
d__Bacteria	k__norank_d__Bacteria	p__Bacteroidetes	c__Bacteroidia	o__Bacteroidales	f__Tannerellaceae	g__Parabacteroides	s__Porphyromonadaceae_bacterium_DJF_B175	OTU1330	0	0	0	0	0	0	0	0	0	0	0	0	1	23	8	3	18	11	8
d__Bacteria	k__norank_d__Bacteria	p__Bacteroidetes	c__Bacteroidia	o__Bacteroidales	f__Prevotellaceae	g__Prevotellaceae_UCG-001	s__uncultured_bacterium_g__Prevotellaceae_UCG-001	OTU1331	19	2	0	1	0	1	3	3	7	2	1	3	3	2	1	8	0	0	3
d__Bacteria	k__norank_d__Bacteria	p__Fibrobacteres	c__Fibrobacteria	o__Fibrobacterales	f__Fibrobacteraceae	g__Fibrobacter	s__uncultured_bacterium_g__Fibrobacter	OTU1332	0	0	0	0	0	0	0	0	0	0	0	0	0	18	2	0	22	2	0
d__Bacteria	k__norank_d__Bacteria	p__Tenericutes	c__Mollicutes	o__Mollicutes_RF39	f__norank_o__Mollicutes_RF39	g__norank_o__Mollicutes_RF39	s__uncultured_bacterium_g__norank_o__Mollicutes_RF39	OTU1333	0	0	0	0	0	0	0	0	0	0	0	0	1	7	0	0	3	1	2
d__Bacteria	k__norank_d__Bacteria	p__Tenericutes	c__Mollicutes	o__Mollicutes_RF39	f__norank_o__Mollicutes_RF39	g__norank_o__Mollicutes_RF39	s__unclassified_g__norank_o__Mollicutes_RF39	OTU1334	0	0	0	0	0	0	0	0	0	0	0	0	0	26	0	0	1	0	0
d__Bacteria	k__norank_d__Bacteria	p__Tenericutes	c__Mollicutes	o__Mollicutes_RF39	f__norank_o__Mollicutes_RF39	g__norank_o__Mollicutes_RF39	s__unclassified_g__norank_o__Mollicutes_RF39	OTU1335	0	0	0	0	0	0	0	0	0	0	0	0	0	49	5	4	9	2	1
d__Bacteria	k__norank_d__Bacteria	p__Bacteroidetes	c__Bacteroidia	o__Bacteroidales	f__Rikenellaceae	g__Alistipes	s__uncultured_bacterium_g__Alistipes	OTU1336	0	0	0	0	0	0	0	0	0	0	0	0	0	15	0	0	1	0	0
d__Bacteria	k__norank_d__Bacteria	p__Firmicutes	c__Clostridia	o__Clostridiales	f__Ruminococcaceae	g__Ruminococcaceae_UCG-014	s__uncultured_bacterium_g__Ruminococcaceae_UCG-014	OTU1337	3	0	0	0	0	0	0	0	0	0	0	1	0	9	0	0	7	0	0
d__Bacteria	k__norank_d__Bacteria	p__Firmicutes	c__Clostridia	o__Clostridiales	f__Clostridiaceae_1	g__Clostridium_sensu_stricto_1	s__Clostridium_butyricum	OTU1338	8	1	0	0	0	0	0	0	0	0	0	4	9	143	1	0	10	8	0
d__Bacteria	k__norank_d__Bacteria	p__Tenericutes	c__Mollicutes	o__Mollicutes_RF39	f__norank_o__Mollicutes_RF39	g__norank_o__Mollicutes_RF39	s__unclassified_g__norank_o__Mollicutes_RF39	OTU1339	0	0	0	0	0	0	0	0	0	0	0	0	0	32	1	0	10	0	0
d__Bacteria	k__norank_d__Bacteria	p__Chloroflexi	c__Ktedonobacteria	o__Ktedonobacterales	f__Ktedonobacteraceae	g__norank_f__Ktedonobacteraceae	s__uncultured_Ktedobacteria_bacterium_g__norank	OTU134	0	0	0	0	0	0	0	0	5	0	0	0	0	0	0	0	0	0	0
d__Bacteria	k__norank_d__Bacteria	p__Bacteroidetes	c__Bacteroidia	o__Bacteroidales	f__Prevotellaceae	g__Prevotellaceae_UCG-003	s__unclassified_g__Prevotellaceae_UCG-003	OTU1340	0	0	0	0	0	0	0	0	0	0	0	0	0	20	0	0	12	0	3
d__Bacteria	k__norank_d__Bacteria	p__Tenericutes	c__Mollicutes	o__Mollicutes_RF39	f__norank_o__Mollicutes_RF39	g__norank_o__Mollicutes_RF39	s__uncultured_bacterium_g__norank_o__Mollicutes_RF39	OTU1341	0	0	0	0	0	0	0	0	0	0	0	0	0	7	1	1	0	0	0
d__Bacteria	k__norank_d__Bacteria	p__Firmicutes	c__Clostridia	o__Clostridiales	f__unclassified_o__Clostridiales	g__unclassified_o__Clostridiales	s__unclassified_o__Clostridiales	OTU1342	0	0	0	0	0	0	0	0	0	0	0	0	0	2	0	0	0	0	0
d__Bacteria	k__norank_d__Bacteria	p__Bacteroidetes	c__Bacteroidia	o__Bacteroidales	f__Prevotellaceae	g__Alloprevotella	s__unclassified_g__Alloprevotella	OTU1343	0	0	0	0	0	0	0	0	0	0	0	0	11	12	20	27	12	14	121
d__Bacteria	k__norank_d__Bacteria	p__Firmicutes	c__Erysipelotrichia	o__Erysipelotrichales	f__Erysipelotrichaceae	g__norank_f__Erysipelotrichaceae	s__uncultured_bacterium_g__norank_f__Erysipelotrichaceae	OTU1344	0	0	0	0	0	0	0	0	0	0	0	0	10	27	2	2	3	7	2
d__Bacteria	k__norank_d__Bacteria	p__Spirochaetes	c__Spirochaetia	o__Spirochaetales	f__Spirochaetaceae	g__Treponema_2	s__unclassified_g__Treponema_2	OTU1345	0	0	0	0	0	0	0	0	0	0	0	0	0	4	0	0	3	0	0
d__Bacteria	k__norank_d__Bacteria	p__Bacteroidetes	c__Bacteroidia	o__Bacteroidales	f__Tannerellaceae	g__Parabacteroides	s__Porphyromonadaceae_bacterium_DJF_B175	OTU1346	0	0	0	0	0	0	0	0	0	0	0	0	3	282	24	26	128	57	9
d__Bacteria	k__norank_d__Bacteria	p__Spirochaetes	c__Spirochaetia	o__Spirochaetales	f__Spirochaetaceae	g__Sphaerochaeta	s__uncultured_bacterium_g__Sphaerochaeta	OTU1347	0	0	0	0	0	0	0	0	0	0	0	0	1	10	2	2	25	4	1
d__Bacteria	k__norank_d__Bacteria	p__Bacteroidetes	c__Bacteroidia	o__Bacteroidales	f__Muribaculaceae	g__norank_f__Muribaculaceae	s__uncultured_organism_g__norank_f__Muribaculaceae	OTU1348	0	0	0	0	0	0	0	0	0	0	0	0	1	3	16	13	1	13	8
d__Bacteria	k__norank_d__Bacteria	p__Firmicutes	c__Clostridia	o__Clostridiales	f__Peptococcaceae	g__Peptococcus	s__unclassified_g__Peptococcus	OTU1349	0	0	0	0	0	0	0	0	0	0	0	0	0	2	0	0	0	0	0
d__Bacteria	k__norank_d__Bacteria	p__Bacteroidetes	c__Bacteroidia	o__Bacteroidales	f__Prevotellaceae	g__Prevotella	s__Prevotella_buccalis	OTU135	0	0	0	0	0	0	0	0	2	0	0	0	0	0	0	0	0	0	0
d__Bacteria	k__norank_d__Bacteria	p__Firmicutes	c__Clostridia	o__Clostridiales	f__Clostridiaceae_1	g__Clostridium_sensu_stricto_1	s__unclassified_g__Clostridium_sensu_stricto_1	OTU1351	0	0	0	0	0	0	1	0	0	0	0	0	0	206	0	0	3	0	0
d__Bacteria	k__norank_d__Bacteria	p__Bacteroidetes	c__Bacteroidia	o__Bacteroidales	f__Bacteroidaceae	g__Bacteroides	s__unclassified_g__Bacteroides	OTU1352	0	0	0	0	0	0	0	0	0	0	0	0	0	6	0	0	0	5	1
d__Bacteria	k__norank_d__Bacteria	p__Firmicutes	c__Clostridia	o__Clostridiales	f__Peptococcaceae	g__norank_f__Peptococcaceae	s__unclassified_g__norank_f__Peptococcaceae	OTU1353	0	0	0	0	0	0	0	0	0	0	0	0	0	29	2	2	6	1	4
d__Bacteria	k__norank_d__Bacteria	p__Firmicutes	c__Clostridia	o__Clostridiales	f__Ruminococcaceae	g__Ruminococcaceae_UCG-010	s__unclassified_g__Ruminococcaceae_UCG-010	OTU1354	0	0	0	0	0	0	0	0	0	0	0	0	0	2	0	0	2	0	0
d__Bacteria	k__norank_d__Bacteria	p__Firmicutes	c__Clostridia	o__Clostridiales	f__Ruminococcaceae	g__Intestinimonas	s__uncultured_bacterium_g__Intestinimonas	OTU1355	0	0	0	0	0	0	0	0	0	0	0	4	26	55	11	12	0	20	16
d__Bacteria	k__norank_d__Bacteria	p__Firmicutes	c__Clostridia	o__Clostridiales	f__Clostridiales_vadinBB60_group	g__norank_f__Clostridiales_vadinBB60_group	s__uncultured_bacterium_g__norank_f__Clostridiales_vadinBB60_group	OTU1356	0	0	0	0	0	0	0	0	0	0	0	0	1	2	1	0	0	0	0
d__Bacteria	k__norank_d__Bacteria	p__Firmicutes	c__Erysipelotrichia	o__Erysipelotrichales	f__Erysipelotrichaceae	g__Erysipelotrichaceae_UCG-003	s__uncultured_bacterium_g__Erysipelotrichaceae_UCG-003	OTU1357	0	0	1	0	1	0	2	0	0	0	0	0	2	40	3	9	10	1	2
d__Bacteria	k__norank_d__Bacteria	p__Firmicutes	c__Clostridia	o__Clostridiales	f__Lachnospiraceae	g__GCA-900066575	s__uncultured_bacterium_g__GCA-900066575	OTU1358	13	0	0	0	0	1	2	0	0	0	0	8	1	4	3	2	2	3	17
d__Bacteria	k__norank_d__Bacteria	p__Firmicutes	c__Clostridia	o__Clostridiales	f__Ruminococcaceae	g__Ruminococcus_1	s__unclassified_g__Ruminococcus_1	OTU1359	0	0	0	0	0	0	0	0	0	0	0	0	67	10	12	30	12	19	23
d__Bacteria	k__norank_d__Bacteria	p__Bacteroidetes	c__Bacteroidia	o__Sphingobacteriales	f__Sphingobacteriaceae	g__Mucilaginibacter	s__Mucilaginibacter_oryzae	OTU136	0	0	0	0	0	0	0	0	2	0	0	0	0	0	0	0	0	0	0
d__Bacteria	k__norank_d__Bacteria	p__Firmicutes	c__Clostridia	o__Clostridiales	f__Ruminococcaceae	g__Eubacterium]_coprostanoligenes_group	s__uncultured_rumen_bacterium_g__Eubacterium]_coprostanoligenes_group	OTU1360	0	0	0	0	0	0	0	0	0	0	0	0	7	0	1	2	5	0	0
d__Bacteria	k__norank_d__Bacteria	p__Firmicutes	c__Erysipelotrichia	o__Erysipelotrichales	f__Erysipelotrichaceae	g__norank_f__Erysipelotrichaceae	s__uncultured_rumen_bacterium_g__norank_f__Erysipelotrichaceae	OTU1361	0	0	0	0	0	0	0	0	0	0	0	0	0	0	1	0	0	2	0
d__Bacteria	k__norank_d__Bacteria	p__Firmicutes	c__Negativicutes	o__Selenomonadales	f__Veillonellaceae	g__Dialister	s__unclassified_g__Dialister	OTU1362	0	0	0	0	0	0	0	0	0	0	0	0	1	0	7	4	0	2	2
d__Bacteria	k__norank_d__Bacteria	p__Firmicutes	c__Erysipelotrichia	o__Erysipelotrichales	f__Erysipelotrichaceae	g__Catenisphaera	s__uncultured_bacterium_g__Catenisphaera	OTU1363	0	0	0	0	0	0	0	0	0	0	0	0	19	96	7	7	17	11	10
d__Bacteria	k__norank_d__Bacteria	p__Firmicutes	c__Negativicutes	o__Selenomonadales	f__Veillonellaceae	g__Megasphaera	s__unclassified_g__Megasphaera	OTU1364	0	0	0	0	0	0	0	0	0	0	0	0	3	0	5	19	7	0	30
d__Bacteria	k__norank_d__Bacteria	p__Firmicutes	c__Clostridia	o__Clostridiales	f__Clostridiales_vadinBB60_group	g__norank_f__Clostridiales_vadinBB60_group	s__unclassified_g__norank_f__Clostridiales_vadinBB60_group	OTU1365	0	0	0	0	0	0	0	0	0	0	0	0	0	2	0	0	0	0	0
d__Bacteria	k__norank_d__Bacteria	p__Bacteroidetes	c__Bacteroidia	o__Bacteroidales	f__Prevotellaceae	g__Alloprevotella	s__uncultured_bacterium_g__Alloprevotella	OTU1366	0	0	0	0	0	0	0	0	0	0	0	0	22	2	75	33	3	12	6
d__Bacteria	k__norank_d__Bacteria	p__Bacteroidetes	c__Bacteroidia	o__Bacteroidales	f__unclassified_o__Bacteroidales	g__unclassified_o__Bacteroidales	s__unclassified_o__Bacteroidales	OTU1367	0	0	0	0	0	0	0	0	0	0	0	0	0	0	6	0	1	1	2
d__Bacteria	k__norank_d__Bacteria	p__Firmicutes	c__Clostridia	o__Clostridiales	f__Ruminococcaceae	g__Eubacterium]_coprostanoligenes_group	s__unclassified_g__Eubacterium]_coprostanoligenes_group	OTU1368	0	0	0	0	0	0	0	0	0	0	0	0	0	26	5	1	0	0	0
d__Bacteria	k__norank_d__Bacteria	p__Firmicutes	c__Clostridia	o__Clostridiales	f__Ruminococcaceae	g__Oscillibacter	s__uncultured_bacterium_g__Oscillibacter	OTU1369	5	0	0	0	0	0	0	0	0	0	0	0	7	126	19	16	21	17	12
d__Bacteria	k__norank_d__Bacteria	p__Bacteroidetes	c__Bacteroidia	o__Bacteroidales	f__Muribaculaceae	g__norank_f__Muribaculaceae	s__uncultured_bacterium_g__norank_f__Muribaculaceae	OTU137	0	0	0	0	0	1	2	0	1	0	0	0	2	0	3	0	0	0	0
d__Bacteria	k__norank_d__Bacteria	p__Firmicutes	c__Erysipelotrichia	o__Erysipelotrichales	f__Erysipelotrichaceae	g__Asteroleplasma	s__unclassified_g__Asteroleplasma	OTU1370	0	0	0	0	0	0	0	0	0	0	0	0	3	5	1	2	1	6	5
d__Bacteria	k__norank_d__Bacteria	p__Actinobacteria	c__Actinobacteria	o__Coriobacteriales	f__Atopobiaceae	g__norank_f__Atopobiaceae	s__uncultured_bacterium_g__norank_f__Atopobiaceae	OTU1371	0	0	0	0	0	0	0	0	0	0	0	0	25	9	1	5	4	1	0
d__Bacteria	k__norank_d__Bacteria	p__Firmicutes	c__Clostridia	o__Clostridiales	f__Clostridiales_vadinBB60_group	g__norank_f__Clostridiales_vadinBB60_group	s__gut_metagenome_g__norank_f__Clostridiales_vadinBB60_group	OTU1372	0	0	0	0	0	0	0	0	0	0	0	0	0	1	0	1	1	1	1
d__Bacteria	k__norank_d__Bacteria	p__Fibrobacteres	c__Fibrobacteria	o__Fibrobacterales	f__Fibrobacteraceae	g__Fibrobacter	s__unclassified_g__Fibrobacter	OTU1373	0	0	0	0	0	0	0	0	0	0	0	0	0	36	5	5	8	1	0
d__Bacteria	k__norank_d__Bacteria	p__Firmicutes	c__Clostridia	o__Clostridiales	f__Ruminococcaceae	g__unclassified_f__Ruminococcaceae	s__unclassified_f__Ruminococcaceae	OTU1374	0	0	0	0	0	0	0	0	0	1	0	0	9	4	6	1	0	5	0
d__Bacteria	k__norank_d__Bacteria	p__Firmicutes	c__Clostridia	o__Clostridiales	f__Ruminococcaceae	g__Subdoligranulum	s__uncultured_Ruminococcaceae_bacterium_g__Subdoligranulum	OTU1375	0	0	0	0	10	0	0	0	0	0	0	0	186	101	174	78	29	14	60
d__Bacteria	k__norank_d__Bacteria	p__Firmicutes	c__Clostridia	o__Clostridiales	f__Ruminococcaceae	g__Ruminococcus_1	s__unclassified_g__Ruminococcus_1	OTU1376	0	0	0	0	0	0	0	0	0	0	0	0	0	0	22	0	1	2	8
d__Bacteria	k__norank_d__Bacteria	p__Cyanobacteria	c__Melainabacteria	o__Gastranaerophilales	f__norank_o__Gastranaerophilales	g__norank_o__Gastranaerophilales	s__uncultured_bacterium_g__norank_o__Gastranaerophilales	OTU1377	0	0	0	0	0	0	0	0	0	0	0	0	12	7	8	0	4	0	7
d__Bacteria	k__norank_d__Bacteria	p__Fibrobacteres	c__Fibrobacteria	o__Fibrobacterales	f__Fibrobacteraceae	g__Fibrobacter	s__Fibrobacter_sp.	OTU1378	0	0	0	0	0	0	0	0	0	0	0	0	0	0	3	0	2	0	0
d__Bacteria	k__norank_d__Bacteria	p__Firmicutes	c__Clostridia	o__Clostridiales	f__Ruminococcaceae	g__Caproiciproducens	s__uncultured_bacterium_g__Caproiciproducens	OTU1379	0	0	0	0	0	0	0	0	0	0	0	0	0	22	0	4	8	0	1
d__Bacteria	k__norank_d__Bacteria	p__Proteobacteria	c__unclassified_p__Proteobacteria	o__unclassified_p__Proteobacteria	f__unclassified_p__Proteobacteria	g__unclassified_p__Proteobacteria	s__unclassified_p__Proteobacteria	OTU138	0	0	0	0	0	0	0	0	0	0	1	0	0	0	0	0	0	0	0
d__Bacteria	k__norank_d__Bacteria	p__Firmicutes	c__Clostridia	o__Clostridiales	f__Lachnospiraceae	g__norank_f__Lachnospiraceae	s__unclassified_g__norank_f__Lachnospiraceae	OTU1380	2	0	0	0	0	8	0	0	0	0	0	0	46	57	44	17	16	28	93
d__Bacteria	k__norank_d__Bacteria	p__Firmicutes	c__Clostridia	o__Clostridiales	f__Ruminococcaceae	g__unclassified_f__Ruminococcaceae	s__unclassified_f__Ruminococcaceae	OTU1381	0	0	0	0	0	0	0	0	0	0	0	0	61	70	49	22	41	39	40
d__Bacteria	k__norank_d__Bacteria	p__Firmicutes	c__Clostridia	o__Clostridiales	f__Ruminococcaceae	g__Ruminiclostridium_6	s__uncultured_bacterium_g__Ruminiclostridium_6	OTU1382	0	0	0	0	0	0	0	0	0	0	0	0	9	57	8	7	13	27	7
d__Bacteria	k__norank_d__Bacteria	p__Firmicutes	c__Clostridia	o__Clostridiales	f__Ruminococcaceae	g__unclassified_f__Ruminococcaceae	s__unclassified_f__Ruminococcaceae	OTU1383	0	0	0	0	0	0	0	0	0	0	0	0	0	1	2	0	1	0	0
d__Bacteria	k__norank_d__Bacteria	p__Bacteroidetes	c__Bacteroidia	o__Bacteroidales	f__Tannerellaceae	g__Parabacteroides	s__uncultured_bacterium_g__Parabacteroides	OTU1384	0	0	0	0	0	0	0	0	0	0	0	0	3	0	1	0	1	8	0
d__Bacteria	k__norank_d__Bacteria	p__Firmicutes	c__Clostridia	o__Clostridiales	f__Ruminococcaceae	g__Ruminococcaceae_UCG-013	s__uncultured_rumen_bacterium_g__Ruminococcaceae_UCG-013	OTU1385	0	0	0	0	0	0	0	0	0	0	0	0	1	0	1	2	1	1	1
d__Bacteria	k__norank_d__Bacteria	p__Bacteroidetes	c__Bacteroidia	o__Bacteroidales	f__Bacteroidaceae	g__Bacteroides	s__unclassified_g__Bacteroides	OTU1386	0	0	0	0	0	0	0	0	0	0	0	0	1	1	0	0	4	1	3
d__Bacteria	k__norank_d__Bacteria	p__Bacteroidetes	c__Bacteroidia	o__Bacteroidales	f__Prevotellaceae	g__Prevotellaceae_NK3B31_group	s__uncultured_bacterium_g__Prevotellaceae_NK3B31_group	OTU1387	0	0	0	0	0	0	0	0	0	0	0	0	0	17	20	5	2	1	9
d__Bacteria	k__norank_d__Bacteria	p__Bacteroidetes	c__Bacteroidia	o__Bacteroidales	f__Prevotellaceae	g__Alloprevotella	s__unclassified_g__Alloprevotella	OTU1388	0	0	0	0	0	0	0	0	0	0	0	0	0	13	5	7	7	2	4
d__Bacteria	k__norank_d__Bacteria	p__Bacteroidetes	c__Bacteroidia	o__Bacteroidales	f__Muribaculaceae	g__norank_f__Muribaculaceae	s__uncultured_bacterium_g__norank_f__Muribaculaceae	OTU1389	0	0	0	0	0	0	0	0	0	0	0	0	0	17	24	26	11	3	42
d__Bacteria	k__norank_d__Bacteria	p__Proteobacteria	c__Alphaproteobacteria	o__Rhodobacterales	f__Rhodobacteraceae	g__unclassified_f__Rhodobacteraceae	s__unclassified_f__Rhodobacteraceae	OTU139	0	0	0	0	0	0	0	1	2	0	0	0	0	0	0	0	0	0	0
d__Bacteria	k__norank_d__Bacteria	p__Bacteroidetes	c__Bacteroidia	o__Bacteroidales	f__Rikenellaceae	g__Rikenellaceae_RC9_gut_group	s__uncultured_bacterium_g__Rikenellaceae_RC9_gut_group	OTU1390	0	0	0	0	0	0	0	0	0	0	0	0	2	21	9	1	5	1	1
d__Bacteria	k__norank_d__Bacteria	p__Bacteroidetes	c__Bacteroidia	o__Bacteroidales	f__Muribaculaceae	g__norank_f__Muribaculaceae	s__unclassified_g__norank_f__Muribaculaceae	OTU1391	1	0	1	0	0	5	5	6	3	9	5	5	13	1	4	1	0	1	0
d__Bacteria	k__norank_d__Bacteria	p__Bacteroidetes	c__Bacteroidia	o__Bacteroidales	f__Prevotellaceae	g__unclassified_f__Prevotellaceae	s__unclassified_f__Prevotellaceae	OTU1392	0	0	0	0	0	0	0	0	0	0	0	0	0	0	3	0	0	1	0
d__Bacteria	k__norank_d__Bacteria	p__Firmicutes	c__Clostridia	o__Clostridiales	f__Ruminococcaceae	g__Ruminococcaceae_UCG-004	s__uncultured_bacterium_g__Ruminococcaceae_UCG-004	OTU1393	0	0	0	0	0	0	0	0	0	0	0	0	24	39	31	14	47	2	22
d__Bacteria	k__norank_d__Bacteria	p__Spirochaetes	c__Spirochaetia	o__Spirochaetales	f__Spirochaetaceae	g__Treponema_2	s__uncultured_bacterium_g__Treponema_2	OTU1394	0	0	0	0	0	0	0	0	0	0	0	0	0	0	1	0	11	0	0
d__Bacteria	k__norank_d__Bacteria	p__Proteobacteria	c__Gammaproteobacteria	o__Betaproteobacteriales	f__T34	g__norank_f__T34	s__uncultured_bacterium_g__norank_f__T34	OTU1395	1	0	0	0	0	0	0	0	0	0	0	0	0	1	18	1	18	4	366
d__Bacteria	k__norank_d__Bacteria	p__Firmicutes	c__Clostridia	o__Clostridiales	f__Ruminococcaceae	g__unclassified_f__Ruminococcaceae	s__unclassified_f__Ruminococcaceae	OTU1396	0	0	0	0	0	0	0	0	0	0	0	0	0	0	4	0	0	0	0
d__Bacteria	k__norank_d__Bacteria	p__Bacteroidetes	c__Bacteroidia	o__Bacteroidales	f__Prevotellaceae	g__Prevotellaceae_UCG-004	s__uncultured_bacterium_g__Prevotellaceae_UCG-004	OTU1397	0	0	0	0	0	0	0	0	0	0	0	0	0	6	4	5	5	4	0
d__Bacteria	k__norank_d__Bacteria	p__Bacteroidetes	c__Bacteroidia	o__Bacteroidales	f__Prevotellaceae	g__Prevotella_9	s__uncultured_bacterium_g__Prevotella_9	OTU1398	0	0	0	0	0	0	2	0	0	0	0	0	3550	455	2594	1786	254	1363	1760
d__Bacteria	k__norank_d__Bacteria	p__Bacteroidetes	c__Bacteroidia	o__Bacteroidales	f__Prevotellaceae	g__Prevotellaceae_NK3B31_group	s__uncultured_bacterium_g__Prevotellaceae_NK3B31_group	OTU1399	0	0	0	0	0	0	0	0	0	0	0	0	2	58	9	0	4	0	9
d__Bacteria	k__norank_d__Bacteria	p__Proteobacteria	c__Deltaproteobacteria	o__Bdellovibrionales	f__Bacteriovoracaceae	g__Peredibacter	s__unclassified_g__Peredibacter	OTU14	0	0	0	0	0	0	2	0	0	0	0	0	0	0	0	0	0	0	0
d__Bacteria	k__norank_d__Bacteria	p__Chloroflexi	c__Chloroflexia	o__Thermomicrobiales	f__JG30-KF-CM45	g__norank_f__JG30-KF-CM45	s__metagenome_g__norank_f__JG30-KF-CM45	OTU140	0	1	0	0	0	0	0	0	1	0	0	0	0	0	0	0	0	0	0
d__Bacteria	k__norank_d__Bacteria	p__Proteobacteria	c__Gammaproteobacteria	o__Betaproteobacteriales	f__Burkholderiaceae	g__Sutterella	s__unclassified_g__Sutterella	OTU1400	0	0	0	0	0	0	0	0	0	0	0	0	0	3	3	2	0	3	3
d__Bacteria	k__norank_d__Bacteria	p__Bacteroidetes	c__Bacteroidia	o__Bacteroidales	f__Rikenellaceae	g__Rikenellaceae_RC9_gut_group	s__uncultured_bacterium_g__Rikenellaceae_RC9_gut_group	OTU1401	0	0	0	0	0	0	0	0	0	0	0	0	8	22	12	4	11	6	2
d__Bacteria	k__norank_d__Bacteria	p__Firmicutes	c__Clostridia	o__Clostridiales	f__Ruminococcaceae	g__Ruminiclostridium_5	s__uncultured_bacterium_g__Ruminiclostridium_5	OTU1402	0	0	0	0	0	0	0	0	0	0	0	0	6	33	120	21	32	32	43
d__Bacteria	k__norank_d__Bacteria	p__Bacteroidetes	c__Bacteroidia	o__Bacteroidales	f__Muribaculaceae	g__norank_f__Muribaculaceae	s__uncultured_bacterium_g__norank_f__Muribaculaceae	OTU1403	1	0	0	0	0	0	0	0	0	0	0	0	5	90	45	33	275	7	44
d__Bacteria	k__norank_d__Bacteria	p__Firmicutes	c__Clostridia	o__Clostridiales	f__Ruminococcaceae	g__Ruminococcaceae_UCG-013	s__uncultured_bacterium_g__Ruminococcaceae_UCG-013	OTU1404	0	0	0	0	0	0	0	0	0	0	0	0	0	0	10	3	50	1	0
d__Bacteria	k__norank_d__Bacteria	p__Firmicutes	c__Clostridia	o__Clostridiales	f__Ruminococcaceae	g__unclassified_f__Ruminococcaceae	s__unclassified_f__Ruminococcaceae	OTU1405	0	0	0	0	0	0	0	0	0	0	0	0	1	0	0	0	0	2	1
d__Bacteria	k__norank_d__Bacteria	p__Bacteroidetes	c__Bacteroidia	o__Bacteroidales	f__Muribaculaceae	g__norank_f__Muribaculaceae	s__unclassified_g__norank_f__Muribaculaceae	OTU1406	0	0	0	0	0	0	0	0	0	0	0	0	0	29	23	18	68	31	8
d__Bacteria	k__norank_d__Bacteria	p__Firmicutes	c__Clostridia	o__Clostridiales	f__Ruminococcaceae	g__unclassified_f__Ruminococcaceae	s__unclassified_f__Ruminococcaceae	OTU1407	0	0	0	0	0	0	0	0	0	0	0	0	0	1	1	0	0	0	0
d__Bacteria	k__norank_d__Bacteria	p__Bacteroidetes	c__Bacteroidia	o__Bacteroidales	f__Prevotellaceae	g__Alloprevotella	s__uncultured_bacterium_g__Alloprevotella	OTU1408	0	0	2	0	0	0	0	0	0	0	0	0	0	0	23	1	3	4	19
d__Bacteria	k__norank_d__Bacteria	p__Firmicutes	c__Clostridia	o__Clostridiales	f__Lachnospiraceae	g__unclassified_f__Lachnospiraceae	s__unclassified_f__Lachnospiraceae	OTU1409	6	0	0	0	0	0	0	0	0	0	0	0	0	9	2	6	0	0	1
d__Bacteria	k__norank_d__Bacteria	p__Chloroflexi	c__Ktedonobacteria	o__Ktedonobacterales	f__Ktedonobacteraceae	g__unclassified_f__Ktedonobacteraceae	s__unclassified_f__Ktedonobacteraceae	OTU141	0	0	0	0	0	0	0	0	1	0	0	0	0	0	0	0	0	0	0
d__Bacteria	k__norank_d__Bacteria	p__Firmicutes	c__Clostridia	o__Clostridiales	f__Ruminococcaceae	g__Subdoligranulum	s__uncultured_bacterium_g__Subdoligranulum	OTU1410	3	0	0	1	0	0	0	0	0	0	1	14	457	145	647	419	132	277	690
d__Bacteria	k__norank_d__Bacteria	p__Firmicutes	c__Negativicutes	o__Selenomonadales	f__Veillonellaceae	g__Selenomonas	s__Selenomonas_bovis	OTU1411	0	0	0	0	0	0	0	0	0	0	0	0	39	51	2276	370	198	741	113
d__Bacteria	k__norank_d__Bacteria	p__Firmicutes	c__Clostridia	o__Clostridiales	f__Lachnospiraceae	g__Lachnospira	s__unclassified_g__Lachnospira	OTU1412	0	0	0	0	0	0	0	0	0	0	0	0	144	249	162	101	182	26	246
d__Bacteria	k__norank_d__Bacteria	p__Firmicutes	c__Clostridia	o__Clostridiales	f__Ruminococcaceae	g__unclassified_f__Ruminococcaceae	s__unclassified_f__Ruminococcaceae	OTU1413	0	0	0	0	0	0	0	0	0	0	0	0	0	1	2	2	0	0	0
d__Bacteria	k__norank_d__Bacteria	p__Firmicutes	c__Clostridia	o__Clostridiales	f__Lachnospiraceae	g__Coprococcus_3	s__uncultured_bacterium_g__Coprococcus_3	OTU1414	0	0	0	0	0	0	0	0	0	0	0	4	107	496	251	144	161	79	157
d__Bacteria	k__norank_d__Bacteria	p__Firmicutes	c__Clostridia	o__Clostridiales	f__Defluviitaleaceae	g__Defluviitaleaceae_UCG-011	s__uncultured_bacterium_g__Defluviitaleaceae_UCG-011	OTU1415	0	0	0	0	0	0	0	0	0	0	0	0	5	7	6	1	0	0	4
d__Bacteria	k__norank_d__Bacteria	p__Firmicutes	c__Clostridia	o__Clostridiales	f__Ruminococcaceae	g__unclassified_f__Ruminococcaceae	s__unclassified_f__Ruminococcaceae	OTU1416	0	0	0	0	0	0	0	0	0	0	0	0	0	0	2	2	3	1	6
d__Bacteria	k__norank_d__Bacteria	p__Firmicutes	c__Clostridia	o__Clostridiales	f__Ruminococcaceae	g__Ruminococcaceae_UCG-013	s__uncultured_Clostridiaceae_bacterium_g__Ruminococcaceae_UCG-013	OTU1417	0	0	0	0	0	0	0	0	0	0	0	0	0	14	15	0	0	0	0
d__Bacteria	k__norank_d__Bacteria	p__Firmicutes	c__Clostridia	o__Clostridiales	f__Lachnospiraceae	g__Lachnospiraceae_NK4A136_group	s__uncultured_bacterium_g__Lachnospiraceae_NK4A136_group	OTU1418	1	0	0	0	0	0	0	0	0	0	0	0	0	1	3	0	0	0	0
d__Bacteria	k__norank_d__Bacteria	p__Firmicutes	c__Clostridia	o__Clostridiales	f__Ruminococcaceae	g__Ruminococcaceae_UCG-014	s__gut_metagenome_g__Ruminococcaceae_UCG-014	OTU1419	0	0	0	0	0	0	0	0	0	0	0	0	4	0	47	10	12	3	3
d__Bacteria	k__norank_d__Bacteria	p__Actinobacteria	c__Actinobacteria	o__Streptomycetales	f__Streptomycetaceae	g__Streptomyces	s__unclassified_g__Streptomyces	OTU142	0	0	0	0	0	0	0	0	2	0	0	0	0	0	0	0	0	0	0
d__Bacteria	k__norank_d__Bacteria	p__Firmicutes	c__Clostridia	o__Clostridiales	f__Ruminococcaceae	g__Subdoligranulum	s__unclassified_g__Subdoligranulum	OTU1420	0	0	0	0	0	0	0	0	0	0	0	0	6	0	4	2	3	1	5
d__Bacteria	k__norank_d__Bacteria	p__Firmicutes	c__Clostridia	o__Clostridiales	f__Ruminococcaceae	g__Ruminiclostridium_5	s__metagenome_g__Ruminiclostridium_5	OTU1421	0	0	0	0	0	0	0	0	0	0	0	0	15	20	39	15	52	31	14
d__Bacteria	k__norank_d__Bacteria	p__Firmicutes	c__Clostridia	o__Clostridiales	f__Lachnospiraceae	g__Lachnospiraceae_NK4A136_group	s__gut_metagenome_g__Lachnospiraceae_NK4A136_group	OTU1422	0	0	0	0	0	0	0	0	0	0	0	0	11	75	202	369	4	103	3
d__Bacteria	k__norank_d__Bacteria	p__Firmicutes	c__Clostridia	o__Clostridiales	f__Ruminococcaceae	g__Ruminococcus_1	s__uncultured_bacterium_g__Ruminococcus_1	OTU1423	0	0	0	0	0	0	0	0	0	0	0	0	0	0	125	5	22	6	0
d__Bacteria	k__norank_d__Bacteria	p__Firmicutes	c__Clostridia	o__Clostridiales	f__Ruminococcaceae	g__Ruminococcaceae_UCG-014	s__unclassified_g__Ruminococcaceae_UCG-014	OTU1424	6	0	0	0	0	0	0	0	0	0	0	1	5	96	34	35	63	25	25
d__Bacteria	k__norank_d__Bacteria	p__Firmicutes	c__Clostridia	o__Clostridiales	f__Lachnospiraceae	g__Howardella	s__unclassified_g__Howardella	OTU1425	0	0	0	0	0	0	0	0	0	0	0	0	0	0	0	0	0	0	2
d__Bacteria	k__norank_d__Bacteria	p__Bacteroidetes	c__Bacteroidia	o__Bacteroidales	f__Prevotellaceae	g__unclassified_f__Prevotellaceae	s__unclassified_f__Prevotellaceae	OTU1426	0	0	0	0	0	0	0	0	0	0	0	0	0	0	15	10	0	0	1
d__Bacteria	k__norank_d__Bacteria	p__Firmicutes	c__Clostridia	o__Clostridiales	f__Ruminococcaceae	g__Ruminococcaceae_UCG-010	s__unclassified_g__Ruminococcaceae_UCG-010	OTU1427	0	0	0	0	0	0	0	0	0	0	0	0	0	7	0	4	7	0	0
d__Bacteria	k__norank_d__Bacteria	p__Firmicutes	c__Clostridia	o__Clostridiales	f__Lachnospiraceae	g__Blautia	s__metagenome_g__Blautia	OTU1428	2	0	0	0	0	0	0	0	0	0	0	0	125	38	38	36	9	37	95
d__Bacteria	k__norank_d__Bacteria	p__Firmicutes	c__Clostridia	o__Clostridiales	f__Christensenellaceae	g__Christensenellaceae_R-7_group	s__gut_metagenome_g__Christensenellaceae_R-7_group	OTU1429	0	0	0	0	0	0	0	0	0	0	0	0	0	0	5	0	1	0	1
d__Bacteria	k__norank_d__Bacteria	p__Cyanobacteria	c__Oxyphotobacteria	o__Leptolyngbyales	f__Leptolyngbyaceae	g__unclassified_f__Leptolyngbyaceae	s__unclassified_f__Leptolyngbyaceae	OTU143	0	0	0	0	0	0	0	0	2	0	0	0	0	0	0	0	0	0	0
d__Bacteria	k__norank_d__Bacteria	p__Firmicutes	c__Clostridia	o__Clostridiales	f__Ruminococcaceae	g__Ruminococcus_1	s__unclassified_g__Ruminococcus_1	OTU1430	0	0	0	0	0	0	0	0	0	0	0	0	0	28	14	9	32	56	4
d__Bacteria	k__norank_d__Bacteria	p__Bacteroidetes	c__Bacteroidia	o__Bacteroidales	f__Prevotellaceae	g__Alloprevotella	s__uncultured_bacterium_g__Alloprevotella	OTU1431	0	0	0	0	0	0	0	0	0	0	0	0	121	27	458	132	113	18	21
d__Bacteria	k__norank_d__Bacteria	p__Bacteroidetes	c__Bacteroidia	o__Bacteroidales	f__Muribaculaceae	g__norank_f__Muribaculaceae	s__uncultured_bacterium_g__norank_f__Muribaculaceae	OTU1432	0	0	0	0	0	0	0	0	0	0	0	0	0	1	13	0	4	0	0
d__Bacteria	k__norank_d__Bacteria	p__Firmicutes	c__Clostridia	o__Clostridiales	f__Lachnospiraceae	g__Eubacterium]_hallii_group	s__uncultured_bacterium_g__Eubacterium]_hallii_group	OTU1433	0	0	0	0	0	0	0	0	0	0	0	0	28	53	12	44	25	11	21
d__Bacteria	k__norank_d__Bacteria	p__Firmicutes	c__Clostridia	o__Clostridiales	f__Ruminococcaceae	g__Ruminococcaceae_UCG-005	s__unclassified_g__Ruminococcaceae_UCG-005	OTU1434	0	0	0	0	0	0	0	0	0	0	0	0	1	4	2	0	2	0	0
d__Bacteria	k__norank_d__Bacteria	p__Firmicutes	c__Clostridia	o__Clostridiales	f__Clostridiales_vadinBB60_group	g__norank_f__Clostridiales_vadinBB60_group	s__uncultured_bacterium_g__norank_f__Clostridiales_vadinBB60_group	OTU1435	0	0	0	0	0	0	0	0	0	0	0	0	0	0	1	0	1	0	0
d__Bacteria	k__norank_d__Bacteria	p__Firmicutes	c__Clostridia	o__Clostridiales	f__Lachnospiraceae	g__Lachnospiraceae_FCS020_group	s__uncultured_prokaryote_g__Lachnospiraceae_FCS020_group	OTU1436	0	0	0	0	0	0	0	0	0	0	0	0	0	50	7	1	5	7	13
d__Bacteria	k__norank_d__Bacteria	p__Firmicutes	c__Clostridia	o__Clostridiales	f__Ruminococcaceae	g__Ruminococcaceae_UCG-014	s__uncultured_bacterium_g__Ruminococcaceae_UCG-014	OTU1437	0	0	0	0	0	0	0	0	0	0	0	0	0	15	5	4	5	0	0
d__Bacteria	k__norank_d__Bacteria	p__Firmicutes	c__Clostridia	o__Clostridiales	f__Lachnospiraceae	g__unclassified_f__Lachnospiraceae	s__unclassified_f__Lachnospiraceae	OTU1438	0	0	0	0	0	0	0	0	0	0	0	0	1	2	3	3	1	12	3
d__Bacteria	k__norank_d__Bacteria	p__Bacteroidetes	c__Bacteroidia	o__Bacteroidales	f__Muribaculaceae	g__norank_f__Muribaculaceae	s__uncultured_bacterium_g__norank_f__Muribaculaceae	OTU1439	0	0	0	0	0	0	0	0	0	0	0	0	0	6	8	3	0	0	0
d__Bacteria	k__norank_d__Bacteria	p__Actinobacteria	c__Actinobacteria	o__Corynebacteriales	f__Corynebacteriaceae	g__Corynebacterium_1	s__Corynebacterium_imitans	OTU144	1	1	0	2	3	1	1	2	2	0	3	5	0	0	0	0	0	0	0
d__Bacteria	k__norank_d__Bacteria	p__Firmicutes	c__Clostridia	o__Clostridiales	f__Ruminococcaceae	g__Ruminococcaceae_UCG-013	s__uncultured_bacterium_g__Ruminococcaceae_UCG-013	OTU1440	0	0	0	0	0	0	0	0	0	0	0	0	3	3	1	19	5	1	3
d__Bacteria	k__norank_d__Bacteria	p__Proteobacteria	c__Alphaproteobacteria	o__Rhodospirillales	f__norank_o__Rhodospirillales	g__norank_o__Rhodospirillales	s__unclassified_g__norank_o__Rhodospirillales	OTU1441	0	0	0	0	0	0	0	0	0	0	0	0	0	0	7	3	0	1	2
d__Bacteria	k__norank_d__Bacteria	p__Firmicutes	c__Clostridia	o__Clostridiales	f__Ruminococcaceae	g__Ruminococcaceae_NK4A214_group	s__unclassified_g__Ruminococcaceae_NK4A214_group	OTU1442	7	0	1	0	0	0	0	0	0	0	0	0	1	26	17	20	26	29	20
d__Bacteria	k__norank_d__Bacteria	p__Firmicutes	c__Negativicutes	o__Selenomonadales	f__Veillonellaceae	g__Megasphaera	s__unclassified_g__Megasphaera	OTU1443	0	0	0	0	0	0	0	0	0	0	0	0	11	0	40	15	1	16	3
d__Bacteria	k__norank_d__Bacteria	p__Firmicutes	c__Clostridia	o__Clostridiales	f__Ruminococcaceae	g__Fournierella	s__uncultured_bacterium_g__Fournierella	OTU1444	0	0	0	0	0	0	0	0	0	0	0	0	28	39	192	60	80	85	88
d__Bacteria	k__norank_d__Bacteria	p__Firmicutes	c__Clostridia	o__Clostridiales	f__Ruminococcaceae	g__Ruminiclostridium_6	s__unclassified_g__Ruminiclostridium_6	OTU1445	1	0	0	0	0	0	0	0	0	0	0	0	2	118	12	19	53	14	3
d__Bacteria	k__norank_d__Bacteria	p__Firmicutes	c__Erysipelotrichia	o__Erysipelotrichales	f__Erysipelotrichaceae	g__Turicibacter	s__uncultured_bacterium_g__Turicibacter	OTU1446	3	0	0	2	0	0	0	0	0	0	0	0	87	353	3	0	8	7	2
d__Bacteria	k__norank_d__Bacteria	p__Firmicutes	c__Clostridia	o__Clostridiales	f__Ruminococcaceae	g__Ruminiclostridium_6	s__uncultured_bacterium_g__Ruminiclostridium_6	OTU1447	0	0	0	0	0	0	0	0	0	0	0	0	0	4	1	0	0	0	0
d__Bacteria	k__norank_d__Bacteria	p__Proteobacteria	c__Deltaproteobacteria	o__Desulfovibrionales	f__Desulfovibrionaceae	g__Desulfovibrio	s__uncultured_bacterium_g__Desulfovibrio	OTU1448	0	0	0	0	0	0	1	0	0	1	0	8	0	0	4	1	0	1	0
d__Bacteria	k__norank_d__Bacteria	p__Firmicutes	c__Clostridia	o__Clostridiales	f__Lachnospiraceae	g__unclassified_f__Lachnospiraceae	s__unclassified_f__Lachnospiraceae	OTU1449	0	0	0	0	0	0	0	0	0	0	0	0	136	135	78	87	70	30	37
d__Bacteria	k__norank_d__Bacteria	p__Bacteroidetes	c__Bacteroidia	o__Bacteroidales	f__Muribaculaceae	g__norank_f__Muribaculaceae	s__uncultured_bacterium_g__norank_f__Muribaculaceae	OTU145	1	0	1	0	0	1	2	0	0	2	0	0	2	0	1	1	0	0	0
d__Bacteria	k__norank_d__Bacteria	p__Firmicutes	c__Clostridia	o__Clostridiales	f__Ruminococcaceae	g__norank_f__Ruminococcaceae	s__uncultured_Clostridium_sp._g__norank_f__Ruminococcaceae	OTU1450	0	0	0	0	0	0	0	0	0	0	0	0	2	2	1	0	1	1	0
d__Bacteria	k__norank_d__Bacteria	p__Firmicutes	c__Negativicutes	o__Selenomonadales	f__Veillonellaceae	g__Selenomonas_1	s__uncultured_Veillonellaceae_bacterium_g__Selenomonas_1	OTU1451	0	0	0	0	0	0	0	0	0	0	0	0	0	7	3	0	5	2	5
d__Bacteria	k__norank_d__Bacteria	p__Firmicutes	c__Clostridia	o__Clostridiales	f__Christensenellaceae	g__Christensenellaceae_R-7_group	s__unclassified_g__Christensenellaceae_R-7_group	OTU1452	0	0	0	0	0	0	0	0	0	0	0	0	0	2	1	0	0	5	0
d__Bacteria	k__norank_d__Bacteria	p__Proteobacteria	c__Gammaproteobacteria	o__Aeromonadales	f__Succinivibrionaceae	g__Succinivibrio	s__metagenome_g__Succinivibrio	OTU1453	0	0	0	0	0	0	0	0	0	0	0	0	4	3	9	1	4	36	0
d__Bacteria	k__norank_d__Bacteria	p__Firmicutes	c__Clostridia	o__Clostridiales	f__Ruminococcaceae	g__Ruminococcus_1	s__unclassified_g__Ruminococcus_1	OTU1454	0	0	0	0	0	0	1	0	1	0	0	0	0	0	3	2	1	38	19
d__Bacteria	k__norank_d__Bacteria	p__Firmicutes	c__Clostridia	o__Clostridiales	f__Ruminococcaceae	g__Fournierella	s__unclassified_g__Fournierella	OTU1455	0	0	0	0	0	1	2	0	0	0	0	2	0	0	1	0	0	0	0
d__Bacteria	k__norank_d__Bacteria	p__Proteobacteria	c__Gammaproteobacteria	o__Betaproteobacteriales	f__Burkholderiaceae	g__unclassified_f__Burkholderiaceae	s__unclassified_f__Burkholderiaceae	OTU1456	0	0	0	0	0	0	0	0	0	0	0	0	0	0	1	0	1	1	1
d__Bacteria	k__norank_d__Bacteria	p__Firmicutes	c__Clostridia	o__Clostridiales	f__Ruminococcaceae	g__Faecalibacterium	s__uncultured_organism_g__Faecalibacterium	OTU1457	0	0	0	0	0	0	0	0	0	0	0	0	296	187	112	109	46	160	142
d__Bacteria	k__norank_d__Bacteria	p__Bacteroidetes	c__Bacteroidia	o__Bacteroidales	f__Rikenellaceae	g__Rikenellaceae_RC9_gut_group	s__uncultured_bacterium_g__Rikenellaceae_RC9_gut_group	OTU1458	0	0	0	0	0	0	0	0	0	0	0	0	0	1	0	0	2	1	0
d__Bacteria	k__norank_d__Bacteria	p__Firmicutes	c__Clostridia	o__Clostridiales	f__Ruminococcaceae	g__Ruminococcaceae_UCG-002	s__uncultured_bacterium_g__Ruminococcaceae_UCG-002	OTU1459	0	0	0	2	0	0	0	0	0	0	0	0	0	18	1	17	29	0	6
d__Bacteria	k__norank_d__Bacteria	p__Firmicutes	c__Negativicutes	o__Selenomonadales	f__Veillonellaceae	g__Dialister	s__Dialister_propionicifaciens	OTU146	0	0	0	0	0	0	0	0	0	1	0	0	0	0	0	0	0	0	0
d__Bacteria	k__norank_d__Bacteria	p__Firmicutes	c__Clostridia	o__Clostridiales	f__Christensenellaceae	g__Christensenellaceae_R-7_group	s__bacterium_YE57	OTU1460	0	0	0	0	0	0	0	1	0	0	0	0	0	15	2	6	6	0	0
d__Bacteria	k__norank_d__Bacteria	p__Firmicutes	c__Clostridia	o__Clostridiales	f__Defluviitaleaceae	g__Defluviitaleaceae_UCG-011	s__uncultured_bacterium_g__Defluviitaleaceae_UCG-011	OTU1461	0	0	0	0	0	0	0	0	0	0	0	0	0	2	1	0	0	1	0
d__Bacteria	k__norank_d__Bacteria	p__Patescibacteria	c__Saccharimonadia	o__Saccharimonadales	f__Saccharimonadaceae	g__Candidatus_Saccharimonas	s__uncultured_bacterium_g__Candidatus_Saccharimonas	OTU1462	0	0	0	0	0	0	0	0	0	0	0	0	1	7	11	4	5	3	2
d__Bacteria	k__norank_d__Bacteria	p__Proteobacteria	c__Deltaproteobacteria	o__Desulfovibrionales	f__Desulfovibrionaceae	g__Desulfovibrio	s__unclassified_g__Desulfovibrio	OTU1463	0	0	0	0	0	0	0	0	0	0	0	0	0	4	28	2	23	44	9
d__Bacteria	k__norank_d__Bacteria	p__Firmicutes	c__Clostridia	o__Clostridiales	f__Ruminococcaceae	g__Oscillibacter	s__unclassified_g__Oscillibacter	OTU1464	0	0	0	0	0	0	0	0	0	0	0	0	1	15	15	12	20	8	3
d__Bacteria	k__norank_d__Bacteria	p__Tenericutes	c__Mollicutes	o__Mollicutes_RF39	f__norank_o__Mollicutes_RF39	g__norank_o__Mollicutes_RF39	s__unclassified_g__norank_o__Mollicutes_RF39	OTU1465	0	0	0	0	0	0	0	0	0	0	0	0	0	1	23	7	2	1	0
d__Bacteria	k__norank_d__Bacteria	p__Tenericutes	c__Mollicutes	o__Mollicutes_RF39	f__norank_o__Mollicutes_RF39	g__norank_o__Mollicutes_RF39	s__unclassified_g__norank_o__Mollicutes_RF39	OTU1466	0	0	0	0	0	0	0	0	0	0	0	0	0	8	15	1	0	0	5
d__Bacteria	k__norank_d__Bacteria	p__Tenericutes	c__Mollicutes	o__Mollicutes_RF39	f__norank_o__Mollicutes_RF39	g__norank_o__Mollicutes_RF39	s__uncultured_bacterium_g__norank_o__Mollicutes_RF39	OTU1467	0	0	0	0	0	0	0	0	0	0	0	0	0	0	4	0	0	8	0
d__Bacteria	k__norank_d__Bacteria	p__Firmicutes	c__Clostridia	o__Clostridiales	f__Lachnospiraceae	g__Butyrivibrio	s__unclassified_g__Butyrivibrio	OTU1468	0	0	0	0	0	0	0	0	0	0	0	0	5	155	2	1	7	1	18
d__Bacteria	k__norank_d__Bacteria	p__Bacteroidetes	c__Bacteroidia	o__Bacteroidales	f__Prevotellaceae	g__unclassified_f__Prevotellaceae	s__unclassified_f__Prevotellaceae	OTU1469	0	0	0	0	0	0	0	0	0	0	0	0	3	30	26	26	25	14	27
d__Bacteria	k__norank_d__Bacteria	p__Cyanobacteria	c__Oxyphotobacteria	o__Chloroplast	f__norank_o__Chloroplast	g__norank_o__Chloroplast	s__Nageia_nagi_g__norank	OTU147	0	0	0	0	0	0	0	0	0	43	0	0	0	0	0	0	0	0	0
d__Bacteria	k__norank_d__Bacteria	p__Firmicutes	c__Clostridia	o__Clostridiales	f__Ruminococcaceae	g__Ruminococcaceae_UCG-013	s__unclassified_g__Ruminococcaceae_UCG-013	OTU1470	0	0	0	0	0	0	0	0	0	0	0	0	1	1	0	0	1	2	0
d__Bacteria	k__norank_d__Bacteria	p__Firmicutes	c__Clostridia	o__Clostridiales	f__Lachnospiraceae	g__Eubacterium]_fissicatena_group	s__unclassified_g__Eubacterium]_fissicatena_group	OTU1471	1	0	0	0	0	0	0	0	0	0	0	0	0	5	3	1	8	1	9
d__Bacteria	k__norank_d__Bacteria	p__Firmicutes	c__Clostridia	o__Clostridiales	f__Ruminococcaceae	g__Subdoligranulum	s__uncultured_Faecalibacterium_sp._g__Subdoligranulum	OTU1472	0	0	0	0	0	0	0	0	0	0	0	0	40	0	215	88	0	5	6
d__Bacteria	k__norank_d__Bacteria	p__Firmicutes	c__Clostridia	o__Clostridiales	f__Lachnospiraceae	g__unclassified_f__Lachnospiraceae	s__unclassified_f__Lachnospiraceae	OTU1473	0	0	0	0	0	0	0	0	0	0	0	0	0	1	1	4	2	2	0
d__Bacteria	k__norank_d__Bacteria	p__Firmicutes	c__Clostridia	o__Clostridiales	f__Lachnospiraceae	g__Lachnospiraceae_UCG-010	s__uncultured_bacterium_g__Lachnospiraceae_UCG-010	OTU1474	0	0	0	0	0	0	0	0	0	0	0	0	5	17	11	12	9	17	17
d__Bacteria	k__norank_d__Bacteria	p__Spirochaetes	c__Spirochaetia	o__Spirochaetales	f__Spirochaetaceae	g__Treponema_2	s__Treponema_porcinum	OTU1475	0	0	0	0	0	0	0	0	0	0	0	0	1	33	2	1	25	0	0
d__Bacteria	k__norank_d__Bacteria	p__Bacteroidetes	c__Bacteroidia	o__Bacteroidales	f__Muribaculaceae	g__norank_f__Muribaculaceae	s__uncultured_bacterium_g__norank_f__Muribaculaceae	OTU1476	0	0	0	0	0	0	0	0	0	0	0	0	0	3	3	9	3	18	7
d__Bacteria	k__norank_d__Bacteria	p__Bacteroidetes	c__Bacteroidia	o__Bacteroidales	f__Muribaculaceae	g__norank_f__Muribaculaceae	s__uncultured_bacterium_g__norank_f__Muribaculaceae	OTU1477	2	1	0	0	0	0	2	0	1	0	1	2	1	1	0	2	0	1	1
d__Bacteria	k__norank_d__Bacteria	p__Firmicutes	c__Clostridia	o__Clostridiales	f__Ruminococcaceae	g__Eubacterium]_coprostanoligenes_group	s__uncultured_bacterium_g__Eubacterium]_coprostanoligenes_group	OTU1478	0	0	0	0	0	0	0	0	0	0	0	0	0	0	12	82	13	0	0
d__Bacteria	k__norank_d__Bacteria	p__Firmicutes	c__Clostridia	o__Clostridiales	f__Ruminococcaceae	g__Ruminiclostridium_9	s__unclassified_g__Ruminiclostridium_9	OTU1479	16	2	0	0	0	0	3	0	2	1	0	3	20	51	28	15	37	28	16
d__Bacteria	k__norank_d__Bacteria	p__Bacteroidetes	c__Bacteroidia	o__Sphingobacteriales	f__Sphingobacteriaceae	g__Sphingobacterium	s__Sphingobacterium_thermophilum	OTU148	0	0	0	0	0	0	0	0	0	2	0	0	0	0	0	0	0	0	0
d__Bacteria	k__norank_d__Bacteria	p__Firmicutes	c__Bacilli	o__Lactobacillales	f__Lactobacillaceae	g__Lactobacillus	s__unclassified_g__Lactobacillus	OTU1480	0	0	0	0	0	0	0	0	0	0	0	10	0	0	0	1	3	5	63
d__Bacteria	k__norank_d__Bacteria	p__Firmicutes	c__Clostridia	o__Clostridiales	f__Ruminococcaceae	g__Ruminococcaceae_UCG-009	s__uncultured_bacterium_g__Ruminococcaceae_UCG-009	OTU1481	4	0	0	1	0	0	0	1	0	0	0	0	15	48	4	8	11	14	6
d__Bacteria	k__norank_d__Bacteria	p__Firmicutes	c__Clostridia	o__Clostridiales	f__Ruminococcaceae	g__Ruminococcaceae_UCG-010	s__metagenome_g__Ruminococcaceae_UCG-010	OTU1482	0	0	0	0	0	0	0	0	0	0	0	0	0	1	1	3	11	0	0
d__Bacteria	k__norank_d__Bacteria	p__Firmicutes	c__Negativicutes	o__Selenomonadales	f__Acidaminococcaceae	g__Acidaminococcus	s__unclassified_g__Acidaminococcus	OTU1483	0	0	0	0	0	0	0	0	0	0	0	0	93	0	6	39	0	14	0
d__Bacteria	k__norank_d__Bacteria	p__Bacteroidetes	c__Bacteroidia	o__Bacteroidales	f__Prevotellaceae	g__Prevotella_9	s__metagenome_g__Prevotella_9	OTU1484	1	0	0	0	0	0	2	0	0	0	1	0	3233	471	2962	3541	384	3806	2516
d__Bacteria	k__norank_d__Bacteria	p__Tenericutes	c__Mollicutes	o__Mollicutes_RF39	f__norank_o__Mollicutes_RF39	g__norank_o__Mollicutes_RF39	s__unclassified_g__norank_o__Mollicutes_RF39	OTU1485	0	0	0	0	0	0	0	0	0	0	0	0	0	7	0	3	1	0	0
d__Bacteria	k__norank_d__Bacteria	p__Tenericutes	c__Mollicutes	o__Mollicutes_RF39	f__norank_o__Mollicutes_RF39	g__norank_o__Mollicutes_RF39	s__unclassified_g__norank_o__Mollicutes_RF39	OTU1486	0	0	0	0	0	0	0	0	0	0	0	0	7	0	13	0	32	1	57
d__Bacteria	k__norank_d__Bacteria	p__Firmicutes	c__Bacilli	o__Lactobacillales	f__Lactobacillaceae	g__Lactobacillus	s__Lactobacillus_amylovorus	OTU1487	1	1	0	3	0	0	0	0	0	0	0	12	6	5	8	7	21	8	72
d__Bacteria	k__norank_d__Bacteria	p__Tenericutes	c__Mollicutes	o__Mollicutes_RF39	f__norank_o__Mollicutes_RF39	g__norank_o__Mollicutes_RF39	s__unclassified_g__norank_o__Mollicutes_RF39	OTU1488	0	0	0	0	0	0	0	0	0	0	0	0	0	0	0	2	0	0	1
d__Bacteria	k__norank_d__Bacteria	p__Proteobacteria	c__Gammaproteobacteria	o__Pasteurellales	f__Pasteurellaceae	g__Actinobacillus	s__Bisgaard_Taxon_10	OTU1489	0	0	0	0	0	0	0	0	0	0	0	0	0	0	1	0	0	2	0
d__Bacteria	k__norank_d__Bacteria	p__Bacteroidetes	c__Bacteroidia	o__Bacteroidales	f__Prevotellaceae	g__Prevotella	s__Prevotella_timonensis	OTU149	0	0	0	0	0	0	0	0	0	3	0	0	0	0	0	0	0	0	0
d__Bacteria	k__norank_d__Bacteria	p__Bacteroidetes	c__Bacteroidia	o__Bacteroidales	f__Prevotellaceae	g__unclassified_f__Prevotellaceae	s__unclassified_f__Prevotellaceae	OTU1490	0	0	0	0	0	0	0	0	0	0	0	0	30	9	8	53	0	81	2
d__Bacteria	k__norank_d__Bacteria	p__Tenericutes	c__Mollicutes	o__Mollicutes_RF39	f__norank_o__Mollicutes_RF39	g__norank_o__Mollicutes_RF39	s__uncultured_bacterium_g__norank_o__Mollicutes_RF39	OTU1491	0	0	0	0	0	0	0	0	0	0	0	0	46	5	8	14	2	15	1
d__Bacteria	k__norank_d__Bacteria	p__Firmicutes	c__Negativicutes	o__Selenomonadales	f__Veillonellaceae	g__Anaerovibrio	s__uncultured_bacterium_g__Anaerovibrio	OTU1492	0	0	0	0	0	0	0	0	0	0	0	0	68	355	366	355	52	87	33
d__Bacteria	k__norank_d__Bacteria	p__Firmicutes	c__Negativicutes	o__Selenomonadales	f__Veillonellaceae	g__Megasphaera	s__unclassified_g__Megasphaera	OTU1493	0	0	0	0	0	0	0	0	0	0	1	0	3291	95	2591	4682	322	1701	1521
d__Bacteria	k__norank_d__Bacteria	p__Actinobacteria	c__Actinobacteria	o__Coriobacteriales	f__Eggerthellaceae	g__norank_f__Eggerthellaceae	s__uncultured_bacterium_g__norank_f__Eggerthellaceae	OTU1494	0	0	0	0	0	0	0	0	0	0	0	0	6	5	3	4	3	2	4
d__Bacteria	k__norank_d__Bacteria	p__Firmicutes	c__Bacilli	o__Lactobacillales	f__Lactobacillaceae	g__Lactobacillus	s__unclassified_g__Lactobacillus	OTU1495	57	1	0	5	0	1	1	2	0	1	8	20	98	7	481	1891	2410	178	6632
d__Bacteria	k__norank_d__Bacteria	p__Firmicutes	c__Clostridia	o__Clostridiales	f__Ruminococcaceae	g__unclassified_f__Ruminococcaceae	s__unclassified_f__Ruminococcaceae	OTU1496	0	0	0	0	0	0	0	0	0	0	0	0	0	0	0	0	2	0	0
d__Bacteria	k__norank_d__Bacteria	p__Firmicutes	c__Clostridia	o__Clostridiales	f__Ruminococcaceae	g__Fournierella	s__uncultured_bacterium_g__Fournierella	OTU1497	0	1	0	0	0	0	0	0	0	0	0	0	8	33	35	17	42	2	6
d__Bacteria	k__norank_d__Bacteria	p__Proteobacteria	c__Gammaproteobacteria	o__Betaproteobacteriales	f__Burkholderiaceae	g__Oxalobacter	s__unclassified_g__Oxalobacter	OTU1498	0	0	0	0	0	0	0	0	0	0	0	0	0	22	0	2	4	4	0
d__Bacteria	k__norank_d__Bacteria	p__Spirochaetes	c__Spirochaetia	o__Spirochaetales	f__Spirochaetaceae	g__Treponema_2	s__Treponema_berlinense	OTU1499	0	0	0	0	0	0	0	0	0	0	0	0	0	1	2	3	32	13	0
d__Bacteria	k__norank_d__Bacteria	p__Actinobacteria	c__Actinobacteria	o__Micrococcales	f__Micrococcaceae	g__Rothia	s__unclassified_g__Rothia	OTU15	0	0	1	0	0	0	1	0	0	0	0	0	0	0	0	0	0	0	0
d__Bacteria	k__norank_d__Bacteria	p__Bacteroidetes	c__Bacteroidia	o__Bacteroidales	f__Muribaculaceae	g__norank_f__Muribaculaceae	s__uncultured_bacterium_g__norank_f__Muribaculaceae	OTU150	0	0	0	0	0	1	0	0	0	2	1	0	1	0	0	0	0	0	0
d__Bacteria	k__norank_d__Bacteria	p__Firmicutes	c__Clostridia	o__Clostridiales	f__Peptococcaceae	g__Peptococcus	s__uncultured_bacterium_g__Peptococcus	OTU1500	0	0	0	0	0	0	0	0	0	0	0	0	1	8	1	2	4	0	3
d__Bacteria	k__norank_d__Bacteria	p__Bacteroidetes	c__Bacteroidia	o__Bacteroidales	f__Tannerellaceae	g__Parabacteroides	s__Porphyromonadaceae_bacterium_DJF_B175	OTU1501	0	0	0	0	0	0	0	0	0	0	0	0	0	12	1	5	13	7	2
d__Bacteria	k__norank_d__Bacteria	p__Spirochaetes	c__Spirochaetia	o__Spirochaetales	f__Spirochaetaceae	g__Treponema_2	s__Treponema_succinifaciens_DSM_2489	OTU1502	0	0	0	0	0	0	0	0	0	0	0	0	0	2	5	5	18	28	0
d__Bacteria	k__norank_d__Bacteria	p__Bacteroidetes	c__Bacteroidia	o__Bacteroidales	f__Prevotellaceae	g__norank_f__Prevotellaceae	s__metagenome_g__norank_f__Prevotellaceae	OTU1503	0	0	0	0	0	0	0	0	0	0	0	0	1078	457	586	826	160	532	439
d__Bacteria	k__norank_d__Bacteria	p__Tenericutes	c__Mollicutes	o__Mollicutes_RF39	f__norank_o__Mollicutes_RF39	g__norank_o__Mollicutes_RF39	s__uncultured_bacterium_g__norank_o__Mollicutes_RF39	OTU1504	0	0	0	0	0	0	0	0	0	0	0	0	16	28	38	9	0	17	13
d__Bacteria	k__norank_d__Bacteria	p__Spirochaetes	c__Spirochaetia	o__Spirochaetales	f__Spirochaetaceae	g__Sphaerochaeta	s__uncultured_prokaryote_g__Sphaerochaeta	OTU1505	0	0	0	0	0	0	0	0	0	0	0	0	0	1	0	3	3	1	0
d__Bacteria	k__norank_d__Bacteria	p__Firmicutes	c__Negativicutes	o__Selenomonadales	f__Veillonellaceae	g__Megasphaera	s__Megasphaera_sp._MH	OTU1506	0	0	0	0	0	0	0	0	0	0	0	0	180	3	54	59	3	74	12
d__Bacteria	k__norank_d__Bacteria	p__Bacteroidetes	c__Bacteroidia	o__Bacteroidales	f__Prevotellaceae	g__Prevotellaceae_NK3B31_group	s__metagenome_g__Prevotellaceae_NK3B31_group	OTU1507	0	0	0	0	0	0	0	0	0	0	0	0	26	97	46	56	138	51	37
d__Bacteria	k__norank_d__Bacteria	p__Tenericutes	c__Mollicutes	o__Mollicutes_RF39	f__norank_o__Mollicutes_RF39	g__norank_o__Mollicutes_RF39	s__uncultured_bacterium_g__norank_o__Mollicutes_RF39	OTU1508	0	0	0	0	0	0	0	0	0	0	0	0	0	29	10	8	13	0	0
d__Bacteria	k__norank_d__Bacteria	p__Tenericutes	c__Mollicutes	o__Mollicutes_RF39	f__norank_o__Mollicutes_RF39	g__norank_o__Mollicutes_RF39	s__uncultured_organism_g__norank_o__Mollicutes_RF39	OTU1509	0	0	0	0	0	0	0	0	0	0	0	0	1	11	36	10	12	8	14
d__Bacteria	k__norank_d__Bacteria	p__Bacteroidetes	c__Bacteroidia	o__Chitinophagales	f__Chitinophagaceae	g__norank_f__Chitinophagaceae	s__unclassified_g__norank_f__Chitinophagaceae	OTU151	2	11	9	11	5	13	4	7	2	8	33	14	0	0	0	0	0	0	0
d__Bacteria	k__norank_d__Bacteria	p__Tenericutes	c__Mollicutes	o__Mollicutes_RF39	f__norank_o__Mollicutes_RF39	g__norank_o__Mollicutes_RF39	s__gut_metagenome_g__norank_o__Mollicutes_RF39	OTU1510	0	0	0	0	0	0	0	0	0	0	0	0	4	103	13	16	11	2	1
d__Bacteria	k__norank_d__Bacteria	p__Firmicutes	c__Negativicutes	o__Selenomonadales	f__Veillonellaceae	g__Mitsuokella	s__uncultured_bacterium_g__Mitsuokella	OTU1511	0	0	0	0	0	0	0	0	0	0	0	0	34	14	18	101	10	118	19
d__Bacteria	k__norank_d__Bacteria	p__Proteobacteria	c__Deltaproteobacteria	o__Bradymonadales	f__norank_o__Bradymonadales	g__norank_o__Bradymonadales	s__uncultured_rumen_bacterium_g__norank_o__Bradymonadales	OTU1512	0	0	0	2	0	0	0	0	0	0	0	0	0	2	2	4	1	28	1
d__Bacteria	k__norank_d__Bacteria	p__Firmicutes	c__Clostridia	o__Clostridiales	f__Ruminococcaceae	g__Ruminococcus_2	s__unclassified_g__Ruminococcus_2	OTU1513	0	0	0	0	0	0	0	0	0	0	0	0	13	7	2	5	2	6	1
d__Bacteria	k__norank_d__Bacteria	p__Firmicutes	c__Bacilli	o__Lactobacillales	f__Streptococcaceae	g__Streptococcus	s__Streptococcus_hyointestinalis	OTU1514	0	0	0	1	0	1	0	0	0	0	0	0	451	252	14	42	43	231	10
d__Bacteria	k__norank_d__Bacteria	p__Proteobacteria	c__Deltaproteobacteria	o__Desulfovibrionales	f__Desulfovibrionaceae	g__Desulfovibrio	s__gut_metagenome_g__Desulfovibrio	OTU1515	0	0	0	0	0	0	0	0	0	0	0	0	6	26	3	99	61	28	42
d__Bacteria	k__norank_d__Bacteria	p__Proteobacteria	c__Gammaproteobacteria	o__Betaproteobacteriales	f__Burkholderiaceae	g__Parasutterella	s__Parasutterella_secunda	OTU1516	0	0	0	0	0	0	0	0	0	0	0	0	0	2	0	2	0	1	0
d__Bacteria	k__norank_d__Bacteria	p__Firmicutes	c__Negativicutes	o__Selenomonadales	f__Veillonellaceae	g__norank_f__Veillonellaceae	s__uncultured_rumen_bacterium_4C28d-2	OTU1517	0	0	0	0	0	0	0	0	0	0	0	0	43	14	2	4	5	0	5
d__Bacteria	k__norank_d__Bacteria	p__Bacteroidetes	c__Bacteroidia	o__Bacteroidales	f__Muribaculaceae	g__norank_f__Muribaculaceae	s__uncultured_bacterium_g__norank_f__Muribaculaceae	OTU1518	0	0	0	0	0	0	0	0	0	0	0	0	0	21	1	0	0	1	0
d__Bacteria	k__norank_d__Bacteria	p__Proteobacteria	c__Alphaproteobacteria	o__Rhodospirillales	f__norank_o__Rhodospirillales	g__norank_o__Rhodospirillales	s__gut_metagenome_g__norank_o__Rhodospirillales	OTU1519	0	0	0	0	0	0	0	0	0	0	0	0	0	0	0	1	1	0	0
d__Bacteria	k__norank_d__Bacteria	p__unclassified_k__norank_d__Bacteria	c__unclassified_k__norank_d__Bacteria	o__unclassified_k__norank_d__Bacteria	f__unclassified_k__norank_d__Bacteria	g__unclassified_k__norank_d__Bacteria	s__unclassified_k__norank_d__Bacteria	OTU152	2	0	0	0	0	0	0	0	0	0	0	0	0	0	0	0	0	0	0
d__Bacteria	k__norank_d__Bacteria	p__Tenericutes	c__Mollicutes	o__Mollicutes_RF39	f__norank_o__Mollicutes_RF39	g__norank_o__Mollicutes_RF39	s__uncultured_bacterium_g__norank_o__Mollicutes_RF39	OTU1520	0	0	0	0	0	0	0	0	0	0	0	0	0	44	4	1	8	0	10
d__Bacteria	k__norank_d__Bacteria	p__Firmicutes	c__Clostridia	o__Clostridiales	f__Ruminococcaceae	g__Oscillibacter	s__uncultured_bacterium_g__Oscillibacter	OTU1521	8	1	0	0	1	3	3	1	1	1	0	3	0	1	0	6	0	0	1
d__Bacteria	k__norank_d__Bacteria	p__Firmicutes	c__Negativicutes	o__Selenomonadales	f__Veillonellaceae	g__Mitsuokella	s__uncultured_bacterium_g__Mitsuokella	OTU1522	0	0	0	0	0	0	0	0	0	0	0	0	772	108	6	56	1	86	4
d__Bacteria	k__norank_d__Bacteria	p__Firmicutes	c__Clostridia	o__Clostridiales	f__Ruminococcaceae	g__Ruminococcaceae_UCG-013	s__uncultured_bacterium_g__Ruminococcaceae_UCG-013	OTU1523	0	0	0	0	0	0	0	0	0	0	0	0	4	3	0	1	0	0	0
d__Bacteria	k__norank_d__Bacteria	p__Firmicutes	c__Clostridia	o__Clostridiales	f__Ruminococcaceae	g__Eubacterium]_coprostanoligenes_group	s__uncultured_organism_g__Eubacterium]_coprostanoligenes_group	OTU1524	0	0	0	0	0	0	0	0	0	0	0	0	15	40	7	139	24	9	5
d__Bacteria	k__norank_d__Bacteria	p__Firmicutes	c__Clostridia	o__Clostridiales	f__Ruminococcaceae	g__Ruminococcaceae_UCG-013	s__uncultured_bacterium_g__Ruminococcaceae_UCG-013	OTU1525	0	0	0	0	0	0	0	0	0	0	0	0	0	25	0	35	6	1	5
d__Bacteria	k__norank_d__Bacteria	p__Firmicutes	c__Clostridia	o__Clostridiales	f__Ruminococcaceae	g__Ruminococcaceae_UCG-014	s__gut_metagenome_g__Ruminococcaceae_UCG-014	OTU1526	0	0	0	0	0	0	0	0	0	0	0	0	0	43	1	58	2	29	0
d__Bacteria	k__norank_d__Bacteria	p__Tenericutes	c__Mollicutes	o__Mollicutes_RF39	f__norank_o__Mollicutes_RF39	g__norank_o__Mollicutes_RF39	s__uncultured_bacterium_g__norank_o__Mollicutes_RF39	OTU1527	0	0	0	0	0	0	0	0	0	0	0	0	9	23	17	24	4	0	13
d__Bacteria	k__norank_d__Bacteria	p__Firmicutes	c__Clostridia	o__Clostridiales	f__Ruminococcaceae	g__Ruminococcus_1	s__metagenome_g__Ruminococcus_1	OTU1528	0	0	0	0	0	0	0	0	0	0	0	0	9	142	97	40	17	112	51
d__Bacteria	k__norank_d__Bacteria	p__Firmicutes	c__Negativicutes	o__Selenomonadales	f__Veillonellaceae	g__Allisonella	s__uncultured_bacterium_g__Allisonella	OTU1529	0	0	0	0	0	0	0	0	0	0	0	0	41	20	8	28	7	24	23
d__Bacteria	k__norank_d__Bacteria	p__Acidobacteria	c__Subgroup_6	o__norank_c__Subgroup_6	f__norank_c__Subgroup_6	g__norank_c__Subgroup_6	s__uncultured_bacterium_g__norank_c__Subgroup_6	OTU153	5	0	0	2	0	0	0	0	0	0	0	0	0	0	0	0	0	0	0
d__Bacteria	k__norank_d__Bacteria	p__Firmicutes	c__Clostridia	o__Clostridiales	f__Lachnospiraceae	g__unclassified_f__Lachnospiraceae	s__unclassified_f__Lachnospiraceae	OTU1530	0	0	0	0	0	0	0	0	0	0	0	0	0	0	0	1	0	0	0
d__Bacteria	k__norank_d__Bacteria	p__Firmicutes	c__Clostridia	o__Clostridiales	f__Ruminococcaceae	g__Oscillospira	s__uncultured_bacterium_g__Oscillospira	OTU1531	0	0	0	0	0	0	0	0	0	0	0	0	0	117	1	1	19	2	5
d__Bacteria	k__norank_d__Bacteria	p__Deferribacteres	c__Deferribacteres	o__Deferribacterales	f__Deferribacteraceae	g__Mucispirillum	s__unclassified_g__Mucispirillum	OTU1532	1	0	0	0	4	2	1	3	0	0	1	0	1	1	0	0	0	0	1
d__Bacteria	k__norank_d__Bacteria	p__Proteobacteria	c__Gammaproteobacteria	o__Enterobacteriales	f__Enterobacteriaceae	g__Pantoea	s__unclassified_g__Pantoea	OTU1533	4	3	1	2	3	1	0	0	0	1	1	12	2	0	0	1	1	0	0
d__Bacteria	k__norank_d__Bacteria	p__Firmicutes	c__Clostridia	o__Clostridiales	f__Ruminococcaceae	g__Ruminococcaceae_UCG-005	s__unclassified_g__Ruminococcaceae_UCG-005	OTU1534	0	0	0	0	0	0	0	0	0	0	0	0	6	51	7	5	52	3	3
d__Bacteria	k__norank_d__Bacteria	p__Firmicutes	c__Clostridia	o__Clostridiales	f__Ruminococcaceae	g__unclassified_f__Ruminococcaceae	s__unclassified_f__Ruminococcaceae	OTU1535	0	0	0	0	0	0	0	0	0	0	0	0	2	13	0	0	3	0	0
d__Bacteria	k__norank_d__Bacteria	p__Firmicutes	c__Clostridia	o__Clostridiales	f__Ruminococcaceae	g__Eubacterium]_coprostanoligenes_group	s__unclassified_g__Eubacterium]_coprostanoligenes_group	OTU1536	0	0	0	0	0	0	0	0	0	0	0	0	0	4	1	1	2	0	0
d__Bacteria	k__norank_d__Bacteria	p__Firmicutes	c__Clostridia	o__Clostridiales	f__Ruminococcaceae	g__Ruminococcaceae_UCG-005	s__uncultured_organism_g__Ruminococcaceae_UCG-005	OTU1537	0	0	0	0	0	0	0	0	0	0	0	0	49	45	28	37	66	65	28
d__Bacteria	k__norank_d__Bacteria	p__Firmicutes	c__Clostridia	o__Clostridiales	f__Ruminococcaceae	g__Butyricicoccus	s__unclassified_g__Butyricicoccus	OTU1538	0	0	0	0	0	0	0	0	0	0	0	0	17	91	37	33	15	11	33
d__Bacteria	k__norank_d__Bacteria	p__Firmicutes	c__Clostridia	o__Clostridiales	f__Lachnospiraceae	g__unclassified_f__Lachnospiraceae	s__unclassified_f__Lachnospiraceae	OTU1539	4	0	0	0	0	0	0	0	0	0	0	0	49	25	28	43	28	23	179
d__Bacteria	k__norank_d__Bacteria	p__Firmicutes	c__Clostridia	o__Clostridiales	f__Clostridiales_vadinBB60_group	g__norank_f__Clostridiales_vadinBB60_group	s__uncultured_bacterium_g__norank_f__Clostridiales_vadinBB60_group	OTU154	1	0	0	0	0	0	0	0	0	0	0	0	0	0	0	0	0	0	0
d__Bacteria	k__norank_d__Bacteria	p__Firmicutes	c__Clostridia	o__Clostridiales	f__Lachnospiraceae	g__Coprococcus_2	s__uncultured_bacterium_g__Coprococcus_2	OTU1540	0	0	0	0	0	0	0	0	0	0	0	0	128	12	13	54	1	150	15
d__Bacteria	k__norank_d__Bacteria	p__Proteobacteria	c__Gammaproteobacteria	o__Betaproteobacteriales	f__Burkholderiaceae	g__Parasutterella	s__gut_metagenome_g__Parasutterella	OTU1541	0	0	0	0	0	1	0	0	0	0	0	0	0	0	0	1	0	0	0
d__Bacteria	k__norank_d__Bacteria	p__Firmicutes	c__Clostridia	o__Clostridiales	f__Lachnospiraceae	g__Bacteroides]_pectinophilus_group	s__uncultured_bacterium_g__Bacteroides]_pectinophilus_group	OTU1542	0	0	0	0	0	0	0	0	0	0	0	0	8	1	8	39	15	17	8
d__Bacteria	k__norank_d__Bacteria	p__Firmicutes	c__Clostridia	o__Clostridiales	f__Lachnospiraceae	g__Eubacterium]_ventriosum_group	s__uncultured_bacterium_g__Eubacterium]_ventriosum_group	OTU1543	0	0	0	0	0	0	0	0	0	0	0	0	1	5	0	1	3	0	0
d__Bacteria	k__norank_d__Bacteria	p__Spirochaetes	c__Spirochaetia	o__Spirochaetales	f__Spirochaetaceae	g__Treponema_2	s__gut_metagenome_g__Treponema_2	OTU1544	0	0	0	0	0	0	0	0	0	0	0	0	0	3	3	0	0	4	5
d__Bacteria	k__norank_d__Bacteria	p__Tenericutes	c__Mollicutes	o__Mollicutes_RF39	f__norank_o__Mollicutes_RF39	g__norank_o__Mollicutes_RF39	s__gut_metagenome_g__norank_o__Mollicutes_RF39	OTU1545	0	0	0	0	0	0	0	0	0	0	0	0	0	2	4	28	3	0	0
d__Bacteria	k__norank_d__Bacteria	p__Firmicutes	c__Clostridia	o__Clostridiales	f__Ruminococcaceae	g__Oscillospira	s__uncultured_bacterium_g__Oscillospira	OTU1546	0	0	0	0	0	0	0	0	0	0	0	0	0	11	4	4	1	9	1
d__Bacteria	k__norank_d__Bacteria	p__Firmicutes	c__Clostridia	o__Clostridiales	f__Lachnospiraceae	g__Lachnospiraceae_NK4A136_group	s__unclassified_g__Lachnospiraceae_NK4A136_group	OTU1547	14	0	1	0	0	0	0	0	1	3	10	5	0	5	0	5	0	0	0
d__Bacteria	k__norank_d__Bacteria	p__Firmicutes	c__Clostridia	o__Clostridiales	f__Ruminococcaceae	g__Oscillibacter	s__unclassified_g__Oscillibacter	OTU1548	0	0	0	0	0	0	0	0	0	0	0	0	3	4	3	4	0	4	3
d__Bacteria	k__norank_d__Bacteria	p__Firmicutes	c__Clostridia	o__Clostridiales	f__Ruminococcaceae	g__Ruminiclostridium_6	s__uncultured_bacterium_g__Ruminiclostridium_6	OTU1549	0	0	0	0	0	1	1	1	0	1	0	0	0	0	1	6	0	0	0
d__Bacteria	k__norank_d__Bacteria	p__Firmicutes	c__Clostridia	o__Clostridiales	f__Family_XI_o__Clostridiales	g__Peptoniphilus	s__unclassified_g__Peptoniphilus	OTU155	2	0	0	0	0	0	0	0	0	0	0	0	0	0	0	0	0	0	0
d__Bacteria	k__norank_d__Bacteria	p__Firmicutes	c__Clostridia	o__Clostridiales	f__Lachnospiraceae	g__unclassified_f__Lachnospiraceae	s__unclassified_f__Lachnospiraceae	OTU1550	0	0	0	0	0	0	0	0	0	0	0	0	0	20	1	4	2	10	0
d__Bacteria	k__norank_d__Bacteria	p__Firmicutes	c__Clostridia	o__Clostridiales	f__Ruminococcaceae	g__Ruminococcaceae_UCG-013	s__uncultured_bacterium_g__Ruminococcaceae_UCG-013	OTU1551	0	0	0	0	0	0	0	0	0	0	0	0	0	2	0	1	5	0	0
d__Bacteria	k__norank_d__Bacteria	p__Firmicutes	c__Clostridia	o__Clostridiales	f__Ruminococcaceae	g__Ruminococcaceae_UCG-013	s__uncultured_Clostridiales_bacterium_g__Ruminococcaceae_UCG-013	OTU1552	0	0	0	0	0	0	0	0	0	0	0	0	1	5	1	1	3	0	0
d__Bacteria	k__norank_d__Bacteria	p__Firmicutes	c__Negativicutes	o__Selenomonadales	f__Veillonellaceae	g__unclassified_f__Veillonellaceae	s__unclassified_f__Veillonellaceae	OTU1553	0	0	0	0	0	0	0	0	0	0	0	0	13	0	15	28	1	11	0
d__Bacteria	k__norank_d__Bacteria	p__Firmicutes	c__Clostridia	o__Clostridiales	f__Lachnospiraceae	g__Lachnospiraceae_ND3007_group	s__metagenome_g__Lachnospiraceae_ND3007_group	OTU1554	0	0	0	0	0	0	0	0	0	0	0	0	34	9	14	25	14	27	77
d__Bacteria	k__norank_d__Bacteria	p__Firmicutes	c__Clostridia	o__Clostridiales	f__Christensenellaceae	g__Christensenellaceae_R-7_group	s__human_gut_metagenome_g__Christensenellaceae_R-7_group	OTU1555	0	0	0	0	0	0	0	0	0	0	0	0	0	1	0	1	0	4	4
d__Bacteria	k__norank_d__Bacteria	p__Firmicutes	c__Clostridia	o__Clostridiales	f__Lachnospiraceae	g__Eubacterium]_ruminantium_group	s__uncultured_bacterium_g__Eubacterium]_ruminantium_group	OTU1556	0	0	0	0	0	0	0	0	0	0	0	0	130	103	36	60	41	121	36
d__Bacteria	k__norank_d__Bacteria	p__Firmicutes	c__Clostridia	o__Clostridiales	f__Lachnospiraceae	g__Oribacterium	s__uncultured_bacterium_g__Oribacterium	OTU1557	0	0	0	0	0	0	0	0	0	0	0	0	339	188	176	211	57	239	113
d__Bacteria	k__norank_d__Bacteria	p__Firmicutes	c__Clostridia	o__Clostridiales	f__Ruminococcaceae	g__Ruminococcaceae_UCG-010	s__unclassified_g__Ruminococcaceae_UCG-010	OTU1558	0	0	0	0	0	0	0	0	0	0	0	0	8	48	3	22	1	8	3
d__Bacteria	k__norank_d__Bacteria	p__Firmicutes	c__Clostridia	o__Clostridiales	f__Lachnospiraceae	g__unclassified_f__Lachnospiraceae	s__unclassified_f__Lachnospiraceae	OTU1559	29	0	0	0	0	0	0	0	0	0	4	0	0	103	17	42	2	2	20
d__Bacteria	k__norank_d__Bacteria	p__unclassified_k__norank_d__Bacteria	c__unclassified_k__norank_d__Bacteria	o__unclassified_k__norank_d__Bacteria	f__unclassified_k__norank_d__Bacteria	g__unclassified_k__norank_d__Bacteria	s__unclassified_k__norank_d__Bacteria	OTU156	3	0	0	0	0	0	0	0	0	0	0	0	0	0	0	0	0	0	0
d__Bacteria	k__norank_d__Bacteria	p__Firmicutes	c__Clostridia	o__Clostridiales	f__Lachnospiraceae	g__Dorea	s__Dorea_formicigenerans_ATCC_27755	OTU1560	0	0	0	1	0	0	2	0	0	0	0	0	132	6	37	90	7	48	44
d__Bacteria	k__norank_d__Bacteria	p__Firmicutes	c__Clostridia	o__Clostridiales	f__Lachnospiraceae	g__Coprococcus_2	s__unclassified_g__Coprococcus_2	OTU1561	0	0	0	0	0	0	0	0	0	0	0	0	37	34	31	50	41	74	31
d__Bacteria	k__norank_d__Bacteria	p__Firmicutes	c__Clostridia	o__Clostridiales	f__Ruminococcaceae	g__unclassified_f__Ruminococcaceae	s__unclassified_f__Ruminococcaceae	OTU1562	0	0	0	0	0	0	0	0	0	0	0	0	0	0	1	3	3	1	1
d__Bacteria	k__norank_d__Bacteria	p__Firmicutes	c__Clostridia	o__Clostridiales	f__Lachnospiraceae	g__Fusicatenibacter	s__uncultured_organism_g__Fusicatenibacter	OTU1563	0	0	0	0	0	0	0	0	0	0	0	0	112	187	71	120	12	72	94
d__Bacteria	k__norank_d__Bacteria	p__Firmicutes	c__Clostridia	o__Clostridiales	f__Lachnospiraceae	g__Lachnospiraceae_UCG-004	s__uncultured_organism_g__Lachnospiraceae_UCG-004	OTU1564	1	0	0	0	0	0	0	0	0	0	0	0	16	20	50	33	32	119	23
d__Bacteria	k__norank_d__Bacteria	p__Firmicutes	c__Clostridia	o__Clostridiales	f__Ruminococcaceae	g__norank_f__Ruminococcaceae	s__unclassified_g__norank_f__Ruminococcaceae	OTU1565	0	0	0	0	0	0	0	0	0	0	0	0	0	1	4	3	0	0	1
d__Bacteria	k__norank_d__Bacteria	p__Firmicutes	c__Clostridia	o__Clostridiales	f__Ruminococcaceae	g__norank_f__Ruminococcaceae	s__unclassified_g__norank_f__Ruminococcaceae	OTU1566	0	0	0	0	0	0	0	0	0	0	0	0	2	2	1	9	3	1	0
d__Bacteria	k__norank_d__Bacteria	p__Firmicutes	c__Clostridia	o__Clostridiales	f__Ruminococcaceae	g__Ruminococcus_1	s__unclassified_g__Ruminococcus_1	OTU1567	0	0	0	0	0	0	0	0	0	0	0	0	85	5	47	47	0	7	22
d__Bacteria	k__norank_d__Bacteria	p__unclassified_k__norank_d__Bacteria	c__unclassified_k__norank_d__Bacteria	o__unclassified_k__norank_d__Bacteria	f__unclassified_k__norank_d__Bacteria	g__unclassified_k__norank_d__Bacteria	s__unclassified_k__norank_d__Bacteria	OTU1568	0	0	0	0	0	0	0	0	0	0	0	0	0	0	1	2	0	0	0
d__Bacteria	k__norank_d__Bacteria	p__Firmicutes	c__Clostridia	o__Clostridiales	f__Lachnospiraceae	g__Dorea	s__unclassified_g__Dorea	OTU1569	9	0	0	0	0	1	0	0	0	0	0	1	75	114	71	101	70	143	52
d__Bacteria	k__norank_d__Bacteria	p__Firmicutes	c__unclassified_p__Firmicutes	o__unclassified_p__Firmicutes	f__unclassified_p__Firmicutes	g__unclassified_p__Firmicutes	s__unclassified_p__Firmicutes	OTU157	1	0	0	0	0	0	0	0	0	0	0	0	0	0	0	0	0	0	0
d__Bacteria	k__norank_d__Bacteria	p__Firmicutes	c__Clostridia	o__Clostridiales	f__Family_XIII	g__Family_XIII_AD3011_group	s__uncultured_bacterium_g__Family_XIII_AD3011_group	OTU1570	0	0	0	0	0	0	0	0	0	0	0	0	6	10	0	3	0	0	1
d__Bacteria	k__norank_d__Bacteria	p__Firmicutes	c__Clostridia	o__Clostridiales	f__Clostridiaceae_1	g__Clostridium_sensu_stricto_6	s__Clostridium_bornimense	OTU1571	0	0	0	0	0	0	0	0	0	0	0	0	4	252	4	2	49	3	5
d__Bacteria	k__norank_d__Bacteria	p__Firmicutes	c__Clostridia	o__Clostridiales	f__Clostridiales_vadinBB60_group	g__norank_f__Clostridiales_vadinBB60_group	s__gut_metagenome_g__norank_f__Clostridiales_vadinBB60_group	OTU1572	0	0	0	0	0	0	0	0	0	0	0	0	0	2	3	1	0	0	1
d__Bacteria	k__norank_d__Bacteria	p__Firmicutes	c__Clostridia	o__Clostridiales	f__Lachnospiraceae	g__unclassified_f__Lachnospiraceae	s__unclassified_f__Lachnospiraceae	OTU1573	0	0	0	0	0	0	0	0	0	0	0	0	3	0	0	0	0	0	1
d__Bacteria	k__norank_d__Bacteria	p__Firmicutes	c__unclassified_p__Firmicutes	o__unclassified_p__Firmicutes	f__unclassified_p__Firmicutes	g__unclassified_p__Firmicutes	s__unclassified_p__Firmicutes	OTU1574	0	0	0	0	0	0	0	0	0	0	0	0	8	0	6	11	0	2	3
d__Bacteria	k__norank_d__Bacteria	p__Firmicutes	c__Clostridia	o__Clostridiales	f__Ruminococcaceae	g__unclassified_f__Ruminococcaceae	s__unclassified_f__Ruminococcaceae	OTU1575	0	0	0	0	0	0	0	0	0	0	0	0	1	10	0	1	2	0	1
d__Bacteria	k__norank_d__Bacteria	p__Firmicutes	c__Negativicutes	o__Selenomonadales	f__Veillonellaceae	g__unclassified_f__Veillonellaceae	s__unclassified_f__Veillonellaceae	OTU1576	0	0	0	0	0	0	0	0	0	0	0	0	78	0	31	43	0	40	9
d__Bacteria	k__norank_d__Bacteria	p__Firmicutes	c__Clostridia	o__Clostridiales	f__Lachnospiraceae	g__unclassified_f__Lachnospiraceae	s__unclassified_f__Lachnospiraceae	OTU1577	0	0	0	0	0	0	0	0	0	0	0	0	0	1	0	10	0	11	0
d__Bacteria	k__norank_d__Bacteria	p__Firmicutes	c__Clostridia	o__Clostridiales	f__Lachnospiraceae	g__Shuttleworthia	s__uncultured_bacterium_g__Shuttleworthia	OTU1578	0	0	0	0	0	0	0	0	0	0	0	0	0	0	2	45	0	13	0
d__Bacteria	k__norank_d__Bacteria	p__Proteobacteria	c__Gammaproteobacteria	o__unclassified_c__Gammaproteobacteria	f__unclassified_c__Gammaproteobacteria	g__unclassified_c__Gammaproteobacteria	s__unclassified_c__Gammaproteobacteria	OTU1579	0	2	0	1	0	0	0	1	0	0	0	1	0	0	0	910	0	0	0
d__Bacteria	k__norank_d__Bacteria	p__Firmicutes	c__Clostridia	o__Clostridiales	f__Ruminococcaceae	g__Ruminococcus_1	s__unclassified_g__Ruminococcus_1	OTU158	1	0	0	0	0	0	0	0	0	0	0	0	0	0	0	0	0	0	0
d__Bacteria	k__norank_d__Bacteria	p__Firmicutes	c__Clostridia	o__Clostridiales	f__Lachnospiraceae	g__Acetitomaculum	s__uncultured_bacterium_g__Acetitomaculum	OTU1580	0	0	0	0	0	0	0	0	0	0	0	0	1	11	1	1	0	0	0
d__Bacteria	k__norank_d__Bacteria	p__Firmicutes	c__Bacilli	o__Lactobacillales	f__Lactobacillaceae	g__Lactobacillus	s__Lactobacillus_mucosae_LM1	OTU1581	0	0	0	0	0	0	0	0	0	0	0	0	0	0	0	4	0	0	17
d__Bacteria	k__norank_d__Bacteria	p__Bacteroidetes	c__Bacteroidia	o__Bacteroidales	f__Muribaculaceae	g__CAG-873	s__uncultured_bacterium_g__CAG-873	OTU1582	0	0	0	0	0	0	0	0	0	0	0	0	0	1	1	1	5	3	0
d__Bacteria	k__norank_d__Bacteria	p__Firmicutes	c__Clostridia	o__Clostridiales	f__Lachnospiraceae	g__unclassified_f__Lachnospiraceae	s__unclassified_f__Lachnospiraceae	OTU1583	0	0	0	0	0	0	0	1	0	0	0	0	0	0	0	0	0	0	0
d__Bacteria	k__norank_d__Bacteria	p__Firmicutes	c__Erysipelotrichia	o__Erysipelotrichales	f__Erysipelotrichaceae	g__Erysipelotrichaceae_UCG-004	s__uncultured_bacterium_g__Erysipelotrichaceae_UCG-004	OTU1584	0	0	0	0	0	0	0	0	0	0	0	0	0	1	0	1	0	4	0
d__Bacteria	k__norank_d__Bacteria	p__Tenericutes	c__Mollicutes	o__Mollicutes_RF39	f__norank_o__Mollicutes_RF39	g__norank_o__Mollicutes_RF39	s__uncultured_bacterium_g__norank_o__Mollicutes_RF39	OTU1585	0	0	0	0	0	0	0	0	0	0	0	0	0	31	0	1	0	0	0
d__Bacteria	k__norank_d__Bacteria	p__Firmicutes	c__Clostridia	o__Clostridiales	f__Ruminococcaceae	g__Ruminococcaceae_UCG-010	s__uncultured_bacterium_g__Ruminococcaceae_UCG-010	OTU1586	0	0	0	0	0	0	0	0	0	0	0	0	0	0	0	5	0	0	0
d__Bacteria	k__norank_d__Bacteria	p__Firmicutes	c__Clostridia	o__Clostridiales	f__Syntrophomonadaceae	g__unclassified_f__Syntrophomonadaceae	s__unclassified_f__Syntrophomonadaceae	OTU1587	0	0	0	0	0	0	0	0	0	0	0	0	0	0	0	0	0	1	0
d__Bacteria	k__norank_d__Bacteria	p__Firmicutes	c__Clostridia	o__Clostridiales	f__Clostridiales_vadinBB60_group	g__norank_f__Clostridiales_vadinBB60_group	s__uncultured_bacterium_g__norank_f__Clostridiales_vadinBB60_group	OTU1588	0	0	0	0	0	0	0	0	0	0	0	0	0	3	0	1	0	0	0
d__Bacteria	k__norank_d__Bacteria	p__Firmicutes	c__Clostridia	o__Clostridiales	f__Ruminococcaceae	g__Ruminococcaceae_UCG-010	s__uncultured_bacterium_g__Ruminococcaceae_UCG-010	OTU1589	0	0	0	0	0	0	0	0	0	0	0	0	0	3	4	7	2	2	2
d__Bacteria	k__norank_d__Bacteria	p__Bacteroidetes	c__Bacteroidia	o__Bacteroidales	f__Rikenellaceae	g__Alistipes	s__uncultured_bacterium_g__Alistipes	OTU159	5	0	0	0	0	0	0	0	0	0	0	0	0	0	0	0	0	0	0
d__Bacteria	k__norank_d__Bacteria	p__Firmicutes	c__Clostridia	o__Clostridiales	f__Lachnospiraceae	g__unclassified_f__Lachnospiraceae	s__unclassified_f__Lachnospiraceae	OTU1590	0	0	0	0	0	0	0	0	0	0	0	0	0	1	5	0	7	4	12
d__Bacteria	k__norank_d__Bacteria	p__Tenericutes	c__Mollicutes	o__Mollicutes_RF39	f__norank_o__Mollicutes_RF39	g__norank_o__Mollicutes_RF39	s__uncultured_bacterium_g__norank_o__Mollicutes_RF39	OTU1591	0	0	0	0	0	0	0	0	0	0	0	0	0	0	0	0	14	0	0
d__Bacteria	k__norank_d__Bacteria	p__Tenericutes	c__Mollicutes	o__Mollicutes_RF39	f__norank_o__Mollicutes_RF39	g__norank_o__Mollicutes_RF39	s__uncultured_prokaryote_g__norank_o__Mollicutes_RF39	OTU1592	0	0	0	0	0	0	0	0	0	0	0	0	0	1	0	0	8	0	0
d__Bacteria	k__norank_d__Bacteria	p__Bacteroidetes	c__Bacteroidia	o__Bacteroidales	f__Prevotellaceae	g__Prevotellaceae_UCG-003	s__uncultured_bacterium_g__Prevotellaceae_UCG-003	OTU1593	0	0	0	0	0	0	0	0	0	0	0	0	81	90	60	71	163	54	133
d__Bacteria	k__norank_d__Bacteria	p__Spirochaetes	c__Spirochaetia	o__Spirochaetales	f__Spirochaetaceae	g__Treponema_2	s__uncultured_bacterium_g__Treponema_2	OTU1594	0	0	0	0	0	0	0	0	0	0	0	0	0	8	0	0	26	1	0
d__Bacteria	k__norank_d__Bacteria	p__Firmicutes	c__Clostridia	o__Clostridiales	f__Ruminococcaceae	g__Ruminococcaceae_V9D2013_group	s__uncultured_rumen_bacterium_g__Ruminococcaceae_V9D2013_group	OTU1595	0	0	0	0	0	0	0	0	0	0	0	0	0	4	0	0	2	0	0
d__Bacteria	k__norank_d__Bacteria	p__Tenericutes	c__Mollicutes	o__Mollicutes_RF39	f__norank_o__Mollicutes_RF39	g__norank_o__Mollicutes_RF39	s__uncultured_bacterium_g__norank_o__Mollicutes_RF39	OTU1596	0	0	0	0	0	0	0	0	0	0	0	0	0	1	0	0	4	0	1
d__Bacteria	k__norank_d__Bacteria	p__Firmicutes	c__Clostridia	o__Clostridiales	f__Ruminococcaceae	g__GCA-900066225	s__uncultured_bacterium_g__GCA-900066225	OTU1597	0	0	0	0	0	0	0	0	0	0	0	0	0	4	2	0	5	0	10
d__Bacteria	k__norank_d__Bacteria	p__Firmicutes	c__Clostridia	o__Clostridiales	f__Ruminococcaceae	g__Ruminococcus_1	s__unclassified_g__Ruminococcus_1	OTU1598	0	0	0	0	0	0	0	0	0	0	0	0	0	0	0	0	22	0	0
d__Bacteria	k__norank_d__Bacteria	p__Proteobacteria	c__Deltaproteobacteria	o__Desulfovibrionales	f__Desulfovibrionaceae	g__Desulfovibrio	s__metagenome_g__Desulfovibrio	OTU1599	0	0	0	0	0	0	0	0	0	0	0	0	24	151	1	0	3	7	0
d__Bacteria	k__norank_d__Bacteria	p__Bacteroidetes	c__Bacteroidia	o__Bacteroidales	f__Rikenellaceae	g__Rikenellaceae_RC9_gut_group	s__unclassified_g__Rikenellaceae_RC9_gut_group	OTU16	34	0	0	0	0	0	1	0	0	0	0	0	0	0	0	0	0	0	0
d__Bacteria	k__norank_d__Bacteria	p__Actinobacteria	c__Actinobacteria	o__Corynebacteriales	f__Corynebacteriaceae	g__Corynebacterium_1	s__Corynebacterium_maris_DSM_45190	OTU160	3	0	0	0	0	0	0	0	0	0	0	0	0	0	0	0	0	0	0
d__Bacteria	k__norank_d__Bacteria	p__Firmicutes	c__Clostridia	o__Clostridiales	f__Ruminococcaceae	g__Candidatus_Soleaferrea	s__unclassified_g__Candidatus_Soleaferrea	OTU1600	0	0	0	0	0	0	0	0	0	0	0	0	4	6	4	1	1	0	2
d__Bacteria	k__norank_d__Bacteria	p__Bacteroidetes	c__Bacteroidia	o__Bacteroidales	f__Muribaculaceae	g__norank_f__Muribaculaceae	s__unclassified_g__norank_f__Muribaculaceae	OTU1601	0	0	0	0	0	0	0	0	0	0	0	0	0	3	12	0	4	1	4
d__Bacteria	k__norank_d__Bacteria	p__Firmicutes	c__Clostridia	o__Clostridiales	f__Lachnospiraceae	g__unclassified_f__Lachnospiraceae	s__unclassified_f__Lachnospiraceae	OTU1602	1	0	1	0	0	0	0	0	0	0	0	0	133	907	318	167	513	185	359
d__Bacteria	k__norank_d__Bacteria	p__Tenericutes	c__Mollicutes	o__Mollicutes_RF39	f__norank_o__Mollicutes_RF39	g__norank_o__Mollicutes_RF39	s__uncultured_bacterium_g__norank_o__Mollicutes_RF39	OTU1603	0	0	0	0	0	0	0	0	0	0	0	0	0	0	0	0	42	0	0
d__Bacteria	k__norank_d__Bacteria	p__Firmicutes	c__Clostridia	o__Clostridiales	f__Ruminococcaceae	g__Ruminococcus_1	s__uncultured_bacterium_g__Ruminococcus_1	OTU1604	0	0	0	0	0	0	0	0	0	0	0	0	0	0	0	9	24	3	0
d__Bacteria	k__norank_d__Bacteria	p__Firmicutes	c__Clostridia	o__Clostridiales	f__Lachnospiraceae	g__unclassified_f__Lachnospiraceae	s__unclassified_f__Lachnospiraceae	OTU1605	0	0	0	0	0	0	0	0	0	0	0	0	0	0	0	1	18	1	0
d__Bacteria	k__norank_d__Bacteria	p__Firmicutes	c__Clostridia	o__Clostridiales	f__Ruminococcaceae	g__unclassified_f__Ruminococcaceae	s__unclassified_f__Ruminococcaceae	OTU1606	0	0	0	0	0	0	0	0	0	0	0	0	0	1	1	2	15	3	1
d__Bacteria	k__norank_d__Bacteria	p__Firmicutes	c__Clostridia	o__Clostridiales	f__Ruminococcaceae	g__Ruminococcaceae_UCG-010	s__uncultured_bacterium_g__Ruminococcaceae_UCG-010	OTU1607	0	0	0	0	0	0	0	0	0	0	0	0	0	0	0	0	41	0	2
d__Bacteria	k__norank_d__Bacteria	p__Firmicutes	c__Clostridia	o__Clostridiales	f__Lachnospiraceae	g__Lachnospiraceae_AC2044_group	s__uncultured_bacterium_g__Lachnospiraceae_AC2044_group	OTU1608	0	0	0	1	0	0	0	0	0	0	0	0	1	1	1	2	432	7	33
d__Bacteria	k__norank_d__Bacteria	p__Firmicutes	c__Clostridia	o__Clostridiales	f__Lachnospiraceae	g__Eubacterium]_ruminantium_group	s__uncultured_bacterium_g__Eubacterium]_ruminantium_group	OTU1609	0	0	0	0	0	0	0	0	0	0	0	0	0	35	40	32	330	176	4
d__Bacteria	k__norank_d__Bacteria	p__unclassified_k__norank_d__Bacteria	c__unclassified_k__norank_d__Bacteria	o__unclassified_k__norank_d__Bacteria	f__unclassified_k__norank_d__Bacteria	g__unclassified_k__norank_d__Bacteria	s__unclassified_k__norank_d__Bacteria	OTU161	3	0	0	0	0	0	0	0	0	0	0	0	0	0	0	0	0	0	0
d__Bacteria	k__norank_d__Bacteria	p__Firmicutes	c__Clostridia	o__Clostridiales	f__Ruminococcaceae	g__Ruminococcaceae_UCG-013	s__unclassified_g__Ruminococcaceae_UCG-013	OTU1610	0	0	0	0	0	0	0	0	0	0	0	0	0	0	0	0	1060	0	0
d__Bacteria	k__norank_d__Bacteria	p__Firmicutes	c__Clostridia	o__Clostridiales	f__Ruminococcaceae	g__Eubacterium]_coprostanoligenes_group	s__uncultured_bacterium_g__Eubacterium]_coprostanoligenes_group	OTU1611	0	0	0	0	0	0	0	0	0	0	0	0	2	8	0	0	4	0	1
d__Bacteria	k__norank_d__Bacteria	p__Firmicutes	c__Clostridia	o__Clostridiales	f__Ruminococcaceae	g__Ruminiclostridium_6	s__uncultured_bacterium_g__Ruminiclostridium_6	OTU1612	22	0	0	0	0	1	0	0	0	0	0	0	0	22	1	1	31	1	0
d__Bacteria	k__norank_d__Bacteria	p__Tenericutes	c__Mollicutes	o__Mollicutes_RF39	f__norank_o__Mollicutes_RF39	g__norank_o__Mollicutes_RF39	s__uncultured_bacterium_g__norank_o__Mollicutes_RF39	OTU1613	0	0	0	0	0	0	0	0	0	0	0	0	0	0	0	0	4	0	0
d__Bacteria	k__norank_d__Bacteria	p__Firmicutes	c__Clostridia	o__Clostridiales	f__Lachnospiraceae	g__Oribacterium	s__uncultured_rumen_bacterium_g__Oribacterium	OTU1614	0	0	0	0	0	0	0	0	0	0	0	0	11	7	3	0	22	7	0
d__Bacteria	k__norank_d__Bacteria	p__Firmicutes	c__Clostridia	o__Clostridiales	f__Lachnospiraceae	g__Anaerostipes	s__Anaerostipes_sp._992a	OTU1615	2	0	0	0	0	0	0	0	0	0	0	0	2	42	1	2	38	3	10
d__Bacteria	k__norank_d__Bacteria	p__Proteobacteria	c__Alphaproteobacteria	o__Rhodospirillales	f__norank_o__Rhodospirillales	g__norank_o__Rhodospirillales	s__gut_metagenome_g__norank_o__Rhodospirillales	OTU1616	0	0	0	0	0	0	0	0	0	0	0	0	0	0	0	0	17	0	0
d__Bacteria	k__norank_d__Bacteria	p__Firmicutes	c__Clostridia	o__Clostridiales	f__Lachnospiraceae	g__Moryella	s__human_gut_metagenome_g__Moryella	OTU1617	0	0	0	0	0	0	0	0	0	0	0	0	5	25	0	7	18	3	3
d__Bacteria	k__norank_d__Bacteria	p__Firmicutes	c__Clostridia	o__Clostridiales	f__Lachnospiraceae	g__Oribacterium	s__unclassified_g__Oribacterium	OTU1618	0	0	0	0	0	0	0	0	0	0	0	0	1	0	0	1	1	3	0
d__Bacteria	k__norank_d__Bacteria	p__Firmicutes	c__Clostridia	o__Clostridiales	f__Lachnospiraceae	g__unclassified_f__Lachnospiraceae	s__unclassified_f__Lachnospiraceae	OTU1619	1	0	0	0	0	0	0	0	0	0	0	0	0	72	10	15	117	3	0
d__Bacteria	k__norank_d__Bacteria	p__Actinobacteria	c__Actinobacteria	o__Streptosporangiales	f__Thermomonosporaceae	g__Thermomonospora	s__unclassified_g__Thermomonospora	OTU162	3	0	0	0	0	0	0	0	0	0	0	0	0	0	0	0	0	0	0
d__Bacteria	k__norank_d__Bacteria	p__Firmicutes	c__Clostridia	o__Clostridiales	f__Lachnospiraceae	g__unclassified_f__Lachnospiraceae	s__unclassified_f__Lachnospiraceae	OTU1620	1	0	0	0	0	0	0	0	0	0	0	0	1	10	3	1	4	0	1
d__Bacteria	k__norank_d__Bacteria	p__Firmicutes	c__Clostridia	o__Clostridiales	f__Ruminococcaceae	g__Fournierella	s__uncultured_organism_g__Fournierella	OTU1621	0	0	0	0	0	0	0	0	0	0	0	0	4	8	5	2	5	0	0
d__Bacteria	k__norank_d__Bacteria	p__Bacteroidetes	c__Bacteroidia	o__Bacteroidales	f__Prevotellaceae	g__Prevotellaceae_NK3B31_group	s__unclassified_g__Prevotellaceae_NK3B31_group	OTU1622	0	0	0	0	0	0	0	0	0	0	0	0	10	82	72	34	3318	47	78
d__Bacteria	k__norank_d__Bacteria	p__Bacteroidetes	c__Bacteroidia	o__Bacteroidales	f__Muribaculaceae	g__norank_f__Muribaculaceae	s__uncultured_Porphyromonadaceae_bacterium_g__norank_f__Muribaculaceae	OTU1623	0	0	0	0	0	0	0	0	0	0	0	0	129	428	64	154	239	224	55
d__Bacteria	k__norank_d__Bacteria	p__Firmicutes	c__Clostridia	o__Clostridiales	f__Lachnospiraceae	g__unclassified_f__Lachnospiraceae	s__unclassified_f__Lachnospiraceae	OTU1624	0	0	0	0	0	0	0	0	0	0	0	0	0	96	1	0	95	3	2
d__Bacteria	k__norank_d__Bacteria	p__Firmicutes	c__Clostridia	o__Clostridiales	f__Ruminococcaceae	g__Ruminococcus_1	s__unclassified_g__Ruminococcus_1	OTU1625	0	0	0	0	0	0	0	0	0	0	0	0	0	0	0	0	9	0	0
d__Bacteria	k__norank_d__Bacteria	p__Firmicutes	c__Clostridia	o__Clostridiales	f__Ruminococcaceae	g__unclassified_f__Ruminococcaceae	s__unclassified_f__Ruminococcaceae	OTU1626	0	0	0	0	0	0	0	0	0	0	0	0	1	2	0	1	0	1	0
d__Bacteria	k__norank_d__Bacteria	p__Firmicutes	c__Clostridia	o__Clostridiales	f__Lachnospiraceae	g__Blautia	s__unclassified_g__Blautia	OTU1627	0	0	2	2	1	3	7	1	1	0	2	0	2	4	0	1	404	60	6
d__Bacteria	k__norank_d__Bacteria	p__Cyanobacteria	c__Melainabacteria	o__Gastranaerophilales	f__norank_o__Gastranaerophilales	g__norank_o__Gastranaerophilales	s__uncultured_bacterium_g__norank_o__Gastranaerophilales	OTU1628	0	0	0	0	0	0	0	0	0	0	0	0	1	4	4	2	6	3	15
d__Bacteria	k__norank_d__Bacteria	p__Firmicutes	c__Clostridia	o__Clostridiales	f__Ruminococcaceae	g__GCA-900066225	s__uncultured_bacterium_g__GCA-900066225	OTU1629	0	0	0	0	0	0	0	0	0	0	0	0	2	0	0	0	3	1	0
d__Bacteria	k__norank_d__Bacteria	p__Rokubacteria	c__NC10	o__Rokubacteriales	f__norank_o__Rokubacteriales	g__norank_o__Rokubacteriales	s__uncultured_bacterium_g__norank_o__Rokubacteriales	OTU163	2	0	0	0	0	0	0	0	0	0	0	0	0	0	0	0	0	0	0
d__Bacteria	k__norank_d__Bacteria	p__Bacteroidetes	c__Bacteroidia	o__Bacteroidales	f__Rikenellaceae	g__Rikenellaceae_RC9_gut_group	s__uncultured_bacterium_g__Rikenellaceae_RC9_gut_group	OTU1630	0	0	0	0	0	0	0	0	0	0	0	0	1	1	2	2	6	1	2
d__Bacteria	k__norank_d__Bacteria	p__Firmicutes	c__Clostridia	o__Clostridiales	f__Ruminococcaceae	g__Ruminococcaceae_UCG-014	s__unclassified_g__Ruminococcaceae_UCG-014	OTU1631	0	0	0	0	0	0	0	0	0	0	0	0	0	0	0	0	5	0	0
d__Bacteria	k__norank_d__Bacteria	p__Firmicutes	c__Clostridia	o__Clostridiales	f__Ruminococcaceae	g__Ruminococcaceae_UCG-009	s__uncultured_bacterium_g__Ruminococcaceae_UCG-009	OTU1632	0	0	0	0	0	0	0	0	0	0	0	0	3	2	1	0	2	4	2
d__Bacteria	k__norank_d__Bacteria	p__Firmicutes	c__Clostridia	o__Clostridiales	f__Lachnospiraceae	g__Eisenbergiella	s__unclassified_g__Eisenbergiella	OTU1633	0	0	0	0	0	0	0	0	0	0	0	0	1	12	0	0	22	0	0
d__Bacteria	k__norank_d__Bacteria	p__Firmicutes	c__Clostridia	o__Clostridiales	f__Lachnospiraceae	g__unclassified_f__Lachnospiraceae	s__unclassified_f__Lachnospiraceae	OTU1634	0	0	0	0	0	0	0	0	0	0	0	0	0	24	0	1	34	1	36
d__Bacteria	k__norank_d__Bacteria	p__Firmicutes	c__Clostridia	o__Clostridiales	f__Ruminococcaceae	g__Ruminococcaceae_UCG-013	s__unclassified_g__Ruminococcaceae_UCG-013	OTU1635	0	0	0	0	0	0	0	0	0	0	0	0	0	0	0	0	4	1	0
d__Bacteria	k__norank_d__Bacteria	p__Firmicutes	c__Clostridia	o__Clostridiales	f__Ruminococcaceae	g__Ruminococcaceae_UCG-013	s__unclassified_g__Ruminococcaceae_UCG-013	OTU1636	0	0	0	0	0	0	0	0	0	0	0	0	0	0	0	5	9	1	0
d__Bacteria	k__norank_d__Bacteria	p__Firmicutes	c__Clostridia	o__Clostridiales	f__Christensenellaceae	g__Christensenellaceae_R-7_group	s__uncultured_bacterium_g__Christensenellaceae_R-7_group	OTU1637	0	0	0	2	0	0	0	0	0	0	0	0	4	5	2	3	8	1	0
d__Bacteria	k__norank_d__Bacteria	p__Firmicutes	c__Clostridia	o__Clostridiales	f__Ruminococcaceae	g__Ruminiclostridium_5	s__Clostridium]_leptum_g__Ruminiclostridium_5	OTU1638	0	0	0	0	0	0	0	0	0	0	0	0	2	0	0	0	1	0	0
d__Bacteria	k__norank_d__Bacteria	p__Firmicutes	c__Clostridia	o__Clostridiales	f__Ruminococcaceae	g__Eubacterium]_coprostanoligenes_group	s__unclassified_g__Eubacterium]_coprostanoligenes_group	OTU1639	0	0	0	0	0	1	0	0	0	0	0	0	0	28	1	2	45	0	0
d__Bacteria	k__norank_d__Bacteria	p__Cyanobacteria	c__Oxyphotobacteria	o__Nostocales	f__unclassified_o__Nostocales	g__unclassified_o__Nostocales	s__unclassified_o__Nostocales	OTU164	1	0	0	0	0	0	0	0	0	0	0	0	0	0	0	0	0	0	0
d__Bacteria	k__norank_d__Bacteria	p__Tenericutes	c__Mollicutes	o__Mollicutes_RF39	f__norank_o__Mollicutes_RF39	g__norank_o__Mollicutes_RF39	s__uncultured_bacterium_g__norank_o__Mollicutes_RF39	OTU1640	0	0	0	0	0	0	0	0	0	0	0	0	0	0	0	0	1	0	0
d__Bacteria	k__norank_d__Bacteria	p__Firmicutes	c__Clostridia	o__Clostridiales	f__Ruminococcaceae	g__Ruminococcaceae_UCG-005	s__uncultured_bacterium_g__Ruminococcaceae_UCG-005	OTU1641	0	0	1	0	0	4	2	0	2	1	0	1	75	67	232	116	1001	110	105
d__Bacteria	k__norank_d__Bacteria	p__Firmicutes	c__Clostridia	o__Clostridiales	f__Ruminococcaceae	g__Caproiciproducens	s__unclassified_g__Caproiciproducens	OTU1642	0	0	0	0	0	0	0	0	0	0	0	0	0	0	0	1	2	0	1
d__Bacteria	k__norank_d__Bacteria	p__Firmicutes	c__Clostridia	o__Clostridiales	f__Ruminococcaceae	g__Ruminococcaceae_UCG-013	s__uncultured_bacterium_g__Ruminococcaceae_UCG-013	OTU1643	0	0	0	0	0	0	0	0	0	0	0	0	0	9	1	1	1	0	0
d__Bacteria	k__norank_d__Bacteria	p__Firmicutes	c__Clostridia	o__Clostridiales	f__Ruminococcaceae	g__Ruminococcaceae_UCG-010	s__unclassified_g__Ruminococcaceae_UCG-010	OTU1644	0	0	0	0	0	0	0	0	0	0	0	0	0	3	0	2	2	0	0
d__Bacteria	k__norank_d__Bacteria	p__Firmicutes	c__Clostridia	o__Clostridiales	f__Christensenellaceae	g__Christensenellaceae_R-7_group	s__unclassified_g__Christensenellaceae_R-7_group	OTU1645	0	0	0	0	0	0	0	0	0	0	0	0	0	5	0	2	2	1	1
d__Bacteria	k__norank_d__Bacteria	p__Firmicutes	c__Clostridia	o__Clostridiales	f__Ruminococcaceae	g__Ruminiclostridium_1	s__uncultured_bacterium_g__Ruminiclostridium_1	OTU1646	0	0	0	0	0	0	0	0	0	0	0	0	0	0	0	0	2	0	0
d__Bacteria	k__norank_d__Bacteria	p__Bacteroidetes	c__Bacteroidia	o__Bacteroidales	f__Prevotellaceae	g__Alloprevotella	s__uncultured_bacterium_g__Alloprevotella	OTU1647	0	0	0	0	0	0	0	0	0	0	0	1	224	89	384	319	381	40	83
d__Bacteria	k__norank_d__Bacteria	p__Firmicutes	c__Clostridia	o__Clostridiales	f__Lachnospiraceae	g__unclassified_f__Lachnospiraceae	s__unclassified_f__Lachnospiraceae	OTU1648	0	0	0	0	0	0	0	0	0	0	0	0	0	10	0	0	1	0	0
d__Bacteria	k__norank_d__Bacteria	p__Bacteroidetes	c__Bacteroidia	o__Bacteroidales	f__unclassified_o__Bacteroidales	g__unclassified_o__Bacteroidales	s__unclassified_o__Bacteroidales	OTU1649	0	0	0	0	0	0	0	0	0	0	0	0	0	0	0	0	7	0	0
d__Bacteria	k__norank_d__Bacteria	p__Tenericutes	c__Mollicutes	o__Anaeroplasmatales	f__Anaeroplasmataceae	g__Anaeroplasma	s__uncultured_bacterium_g__Anaeroplasma	OTU165	6	0	0	0	0	0	0	0	0	0	0	0	0	0	0	0	0	0	0
d__Bacteria	k__norank_d__Bacteria	p__Firmicutes	c__Clostridia	o__Clostridiales	f__Ruminococcaceae	g__unclassified_f__Ruminococcaceae	s__unclassified_f__Ruminococcaceae	OTU1650	0	0	0	0	0	0	0	0	0	0	0	0	1	0	0	0	0	0	0
d__Bacteria	k__norank_d__Bacteria	p__Firmicutes	c__Clostridia	o__Clostridiales	f__Ruminococcaceae	g__norank_f__Ruminococcaceae	s__uncultured_rumen_bacterium_4C0d-17	OTU1651	0	0	0	0	0	0	0	0	0	0	0	0	0	0	0	0	2	0	0
d__Bacteria	k__norank_d__Bacteria	p__Firmicutes	c__Erysipelotrichia	o__Erysipelotrichales	f__Erysipelotrichaceae	g__norank_f__Erysipelotrichaceae	s__uncultured_Solobacterium_sp.	OTU1652	0	0	0	0	0	0	0	0	0	0	0	0	6	42	12	5	3	7	12
d__Bacteria	k__norank_d__Bacteria	p__Tenericutes	c__Mollicutes	o__Mollicutes_RF39	f__norank_o__Mollicutes_RF39	g__norank_o__Mollicutes_RF39	s__uncultured_bacterium_g__norank_o__Mollicutes_RF39	OTU1653	0	0	0	0	0	0	0	0	0	0	0	0	0	0	1	0	1	0	0
d__Bacteria	k__norank_d__Bacteria	p__Firmicutes	c__Clostridia	o__Clostridiales	f__Lachnospiraceae	g__Lachnospiraceae_FCS020_group	s__uncultured_bacterium_g__Lachnospiraceae_FCS020_group	OTU1654	0	0	0	0	0	0	0	0	0	0	0	0	36	15	1	15	5	9	22
d__Bacteria	k__norank_d__Bacteria	p__Cyanobacteria	c__Melainabacteria	o__Gastranaerophilales	f__norank_o__Gastranaerophilales	g__norank_o__Gastranaerophilales	s__uncultured_bacterium_g__norank_o__Gastranaerophilales	OTU1655	0	0	0	0	0	0	0	0	0	0	0	0	0	1	5	10	1	2	2
d__Bacteria	k__norank_d__Bacteria	p__Tenericutes	c__Mollicutes	o__Mollicutes_RF39	f__norank_o__Mollicutes_RF39	g__norank_o__Mollicutes_RF39	s__unclassified_g__norank_o__Mollicutes_RF39	OTU1656	0	0	0	0	0	0	0	0	0	0	0	0	0	7	0	0	4	0	0
d__Bacteria	k__norank_d__Bacteria	p__Firmicutes	c__Clostridia	o__Clostridiales	f__Family_XIII	g__Anaerovorax	s__uncultured_bacterium_g__Anaerovorax	OTU1657	3	0	0	0	0	0	0	0	0	0	0	0	0	6	1	0	6	1	2
d__Bacteria	k__norank_d__Bacteria	p__Firmicutes	c__Clostridia	o__Clostridiales	f__Ruminococcaceae	g__Ruminococcaceae_UCG-010	s__uncultured_bacterium_g__Ruminococcaceae_UCG-010	OTU1658	0	0	0	0	0	0	0	0	0	0	0	0	0	0	0	0	2	0	0
d__Bacteria	k__norank_d__Bacteria	p__Bacteroidetes	c__Bacteroidia	o__Bacteroidales	f__Prevotellaceae	g__norank_f__Prevotellaceae	s__uncultured_bacterium_g__norank_f__Prevotellaceae	OTU1659	0	0	0	0	0	0	0	0	0	0	0	0	0	26	3	1	353	2	16
d__Bacteria	k__norank_d__Bacteria	p__Firmicutes	c__Bacilli	o__Bacillales	f__Paenibacillaceae	g__Ammoniphilus	s__uncultured_bacterium_g__Ammoniphilus	OTU166	3	0	0	0	0	0	0	0	0	0	0	0	0	0	0	0	0	0	0
d__Bacteria	k__norank_d__Bacteria	p__Tenericutes	c__Mollicutes	o__Anaeroplasmatales	f__Anaeroplasmataceae	g__Anaeroplasma	s__uncultured_bacterium_g__Anaeroplasma	OTU1660	0	0	0	0	0	0	0	0	0	0	0	0	0	0	0	0	5	0	0
d__Bacteria	k__norank_d__Bacteria	p__Bacteroidetes	c__Bacteroidia	o__Bacteroidales	f__Prevotellaceae	g__Prevotellaceae_NK3B31_group	s__uncultured_bacterium_g__Prevotellaceae_NK3B31_group	OTU1661	0	0	0	1	0	0	0	0	0	0	0	0	11	574	38	73	339	27	28
d__Bacteria	k__norank_d__Bacteria	p__Tenericutes	c__Mollicutes	o__Mollicutes_RF39	f__norank_o__Mollicutes_RF39	g__norank_o__Mollicutes_RF39	s__unidentified_rumen_bacterium_RF9	OTU1662	0	0	0	0	0	0	0	0	0	0	0	0	0	10	0	0	10	0	0
d__Bacteria	k__norank_d__Bacteria	p__Firmicutes	c__Clostridia	o__Clostridiales	f__Ruminococcaceae	g__Ruminococcaceae_UCG-013	s__uncultured_Firmicutes_bacterium_g__Ruminococcaceae_UCG-013	OTU1663	0	0	0	0	0	0	0	0	0	0	0	0	0	0	1	5	4	0	0
d__Bacteria	k__norank_d__Bacteria	p__Bacteroidetes	c__Bacteroidia	o__Bacteroidales	f__Tannerellaceae	g__Parabacteroides	s__uncultured_bacterium_g__Parabacteroides	OTU1664	0	0	0	0	0	0	0	0	0	0	0	0	0	31	7	6	18	7	2
d__Bacteria	k__norank_d__Bacteria	p__Firmicutes	c__Clostridia	o__Clostridiales	f__Ruminococcaceae	g__Ruminococcaceae_UCG-014	s__uncultured_bacterium_g__Ruminococcaceae_UCG-014	OTU1665	3	0	0	0	0	0	0	0	0	0	0	0	0	0	0	16	0	0	2
d__Bacteria	k__norank_d__Bacteria	p__Firmicutes	c__Clostridia	o__Clostridiales	f__Ruminococcaceae	g__Phocea	s__uncultured_bacterium_g__Phocea	OTU1666	0	0	0	0	1	0	0	0	0	0	0	0	0	2	1	1	0	0	0
d__Bacteria	k__norank_d__Bacteria	p__Firmicutes	c__Clostridia	o__Clostridiales	f__Christensenellaceae	g__Christensenellaceae_R-7_group	s__uncultured_bacterium_g__Christensenellaceae_R-7_group	OTU1667	0	0	0	0	0	0	0	0	0	0	0	0	1	64	6	5	9	3	1
d__Bacteria	k__norank_d__Bacteria	p__Firmicutes	c__Clostridia	o__Clostridiales	f__Ruminococcaceae	g__Butyricicoccus	s__uncultured_bacterium_g__Butyricicoccus	OTU1668	0	0	0	0	0	0	0	0	0	0	0	0	43	43	47	29	75	23	111
d__Bacteria	k__norank_d__Bacteria	p__Firmicutes	c__Clostridia	o__Clostridiales	f__Ruminococcaceae	g__Ruminiclostridium_6	s__uncultured_bacterium_g__Ruminiclostridium_6	OTU1669	0	0	0	0	0	0	0	0	0	0	0	0	0	140	0	5	10	0	0
d__Bacteria	k__norank_d__Bacteria	p__Firmicutes	c__Clostridia	o__Clostridiales	f__Lachnospiraceae	g__norank_f__Lachnospiraceae	s__uncultured_bacterium_g__norank_f__Lachnospiraceae	OTU167	14	0	0	0	0	0	0	0	0	0	0	0	0	0	0	0	0	0	0
d__Bacteria	k__norank_d__Bacteria	p__Firmicutes	c__Clostridia	o__Clostridiales	f__Peptococcaceae	g__norank_f__Peptococcaceae	s__unclassified_g__norank_f__Peptococcaceae	OTU1670	0	0	0	0	0	0	0	0	0	0	0	0	0	0	0	0	1	0	0
d__Bacteria	k__norank_d__Bacteria	p__Firmicutes	c__Erysipelotrichia	o__Erysipelotrichales	f__Erysipelotrichaceae	g__Anaerorhabdus]_furcosa_group	s__uncultured_bacterium_g__Anaerorhabdus]_furcosa_group	OTU1671	0	0	0	0	0	0	0	0	0	0	0	0	1	1	4	3	3	4	2
d__Bacteria	k__norank_d__Bacteria	p__Firmicutes	c__Clostridia	o__Clostridiales	f__Lachnospiraceae	g__Roseburia	s__unclassified_g__Roseburia	OTU1672	0	0	0	0	0	0	0	0	0	0	0	0	1	3	5	1	11	2	15
d__Bacteria	k__norank_d__Bacteria	p__Elusimicrobia	c__Elusimicrobia	o__Elusimicrobiales	f__Elusimicrobiaceae	g__Elusimicrobium	s__uncultured_bacterium_g__Elusimicrobium	OTU1673	0	0	0	0	0	0	0	0	0	0	0	0	0	0	1	1	4	1	0
d__Bacteria	k__norank_d__Bacteria	p__Spirochaetes	c__Spirochaetia	o__Spirochaetales	f__Spirochaetaceae	g__Treponema_2	s__unclassified_g__Treponema_2	OTU1674	0	0	0	0	0	0	0	0	0	0	0	0	0	0	0	0	4	0	0
d__Bacteria	k__norank_d__Bacteria	p__Spirochaetes	c__Spirochaetia	o__Spirochaetales	f__Spirochaetaceae	g__Sphaerochaeta	s__uncultured_prokaryote_g__Sphaerochaeta	OTU1675	0	0	0	0	0	0	0	0	0	0	0	0	1	0	1	0	4	0	0
d__Bacteria	k__norank_d__Bacteria	p__Firmicutes	c__Clostridia	o__Clostridiales	f__Ruminococcaceae	g__Ruminococcaceae_UCG-013	s__unclassified_g__Ruminococcaceae_UCG-013	OTU1676	0	0	0	0	0	0	0	0	0	0	0	0	0	6	0	0	3	0	0
d__Bacteria	k__norank_d__Bacteria	p__Firmicutes	c__Clostridia	o__Clostridiales	f__Ruminococcaceae	g__Ruminiclostridium_5	s__uncultured_bacterium_g__Ruminiclostridium_5	OTU1677	3	0	0	0	0	0	0	0	0	1	0	0	1	2	0	0	2	2	0
d__Bacteria	k__norank_d__Bacteria	p__Bacteroidetes	c__Bacteroidia	o__Bacteroidales	f__Prevotellaceae	g__Alloprevotella	s__unclassified_g__Alloprevotella	OTU1678	0	0	0	0	0	0	0	0	0	0	0	0	2	18	5	12	76	5	8
d__Bacteria	k__norank_d__Bacteria	p__Firmicutes	c__Clostridia	o__Clostridiales	f__Ruminococcaceae	g__Ruminiclostridium_9	s__unclassified_g__Ruminiclostridium_9	OTU1679	0	0	0	0	0	0	0	0	0	0	0	0	0	7	3	0	2	3	3
d__Bacteria	k__norank_d__Bacteria	p__Acidobacteria	c__Subgroup_6	o__norank_c__Subgroup_6	f__norank_c__Subgroup_6	g__norank_c__Subgroup_6	s__unclassified_g__norank_c__Subgroup_6	OTU168	2	0	0	0	0	0	0	0	0	0	0	0	0	0	0	0	0	0	0
d__Bacteria	k__norank_d__Bacteria	p__Firmicutes	c__Clostridia	o__Clostridiales	f__Clostridiales_vadinBB60_group	g__norank_f__Clostridiales_vadinBB60_group	s__uncultured_bacterium_g__norank_f__Clostridiales_vadinBB60_group	OTU1680	0	0	0	0	0	0	0	0	0	0	0	0	0	0	0	0	4	0	0
d__Bacteria	k__norank_d__Bacteria	p__Cyanobacteria	c__Melainabacteria	o__Gastranaerophilales	f__norank_o__Gastranaerophilales	g__norank_o__Gastranaerophilales	s__uncultured_bacterium_g__norank_o__Gastranaerophilales	OTU1681	0	2	0	0	3	0	0	0	0	0	0	2	3	10	10	13	17	2	11
d__Bacteria	k__norank_d__Bacteria	p__Bacteroidetes	c__Bacteroidia	o__Bacteroidales	f__Muribaculaceae	g__norank_f__Muribaculaceae	s__metagenome_g__norank_f__Muribaculaceae	OTU1682	0	0	0	0	0	0	0	0	0	0	0	0	60	20	28	63	16	105	27
d__Bacteria	k__norank_d__Bacteria	p__Bacteroidetes	c__Bacteroidia	o__Bacteroidales	f__Prevotellaceae	g__Prevotellaceae_UCG-001	s__uncultured_rumen_bacterium_g__Prevotellaceae_UCG-001	OTU1683	0	0	0	0	0	0	0	0	0	0	0	0	0	2	0	0	23	8	0
d__Bacteria	k__norank_d__Bacteria	p__Firmicutes	c__Clostridia	o__Clostridiales	f__Ruminococcaceae	g__Ruminococcaceae_UCG-014	s__unclassified_g__Ruminococcaceae_UCG-014	OTU1684	0	0	0	0	0	0	0	0	0	0	0	0	3	7	8	0	16	0	1
d__Bacteria	k__norank_d__Bacteria	p__Firmicutes	c__Clostridia	o__Clostridiales	f__Ruminococcaceae	g__Ruminococcaceae_UCG-014	s__unclassified_g__Ruminococcaceae_UCG-014	OTU1685	19	0	0	1	0	0	0	0	0	0	0	0	0	3	3	0	134	0	1
d__Bacteria	k__norank_d__Bacteria	p__Firmicutes	c__Clostridia	o__Clostridiales	f__Family_XIII	g__unclassified_f__Family_XIII	s__unclassified_f__Family_XIII	OTU1686	0	0	0	0	0	0	0	0	0	0	0	0	0	0	1	0	10	0	1
d__Bacteria	k__norank_d__Bacteria	p__Tenericutes	c__Mollicutes	o__Mollicutes_RF39	f__norank_o__Mollicutes_RF39	g__norank_o__Mollicutes_RF39	s__uncultured_bacterium_g__norank_o__Mollicutes_RF39	OTU1687	0	0	0	0	0	0	0	0	0	0	0	0	0	11	0	0	1	0	1
d__Bacteria	k__norank_d__Bacteria	p__Firmicutes	c__Clostridia	o__Clostridiales	f__Lachnospiraceae	g__Eubacterium]_xylanophilum_group	s__unclassified_g__Eubacterium]_xylanophilum_group	OTU1688	25	0	0	0	0	1	1	0	0	0	0	0	10	88	38	29	78	34	27
d__Bacteria	k__norank_d__Bacteria	p__Firmicutes	c__Clostridia	o__Clostridiales	f__Ruminococcaceae	g__Ruminococcus_1	s__Ruminococcus_sp._HUN007	OTU1689	0	0	0	0	0	0	0	0	0	0	0	0	0	106	0	0	316	1	0
d__Bacteria	k__norank_d__Bacteria	p__Bacteroidetes	c__Bacteroidia	o__Bacteroidales	f__Muribaculaceae	g__Muribaculum	s__uncultured_bacterium_g__Muribaculum	OTU169	4	0	0	1	0	0	0	0	0	0	0	0	0	0	0	0	0	0	0
d__Bacteria	k__norank_d__Bacteria	p__Cyanobacteria	c__Melainabacteria	o__Gastranaerophilales	f__norank_o__Gastranaerophilales	g__norank_o__Gastranaerophilales	s__uncultured_rumen_bacterium_g__norank_o__Gastranaerophilales	OTU1690	0	0	0	0	0	0	0	0	0	0	0	0	0	0	0	0	5	0	0
d__Bacteria	k__norank_d__Bacteria	p__Bacteroidetes	c__Bacteroidia	o__Bacteroidales	f__Prevotellaceae	g__Prevotellaceae_UCG-001	s__uncultured_Bacteroidales_bacterium_g__Prevotellaceae_UCG-001	OTU1691	0	0	0	0	0	0	0	0	0	0	0	0	0	1	0	0	3	0	1
d__Bacteria	k__norank_d__Bacteria	p__Firmicutes	c__Clostridia	o__Clostridiales	f__Ruminococcaceae	g__Ruminococcus_1	s__Ruminococcus_flavefaciens	OTU1692	0	2	0	0	0	3	0	0	6	2	0	1	0	37	2	15	27	0	8
d__Bacteria	k__norank_d__Bacteria	p__Firmicutes	c__Clostridia	o__Clostridiales	f__Lachnospiraceae	g__unclassified_f__Lachnospiraceae	s__unclassified_f__Lachnospiraceae	OTU1693	0	0	0	0	0	0	0	0	0	0	0	0	0	2	1	0	4	0	1
d__Bacteria	k__norank_d__Bacteria	p__Firmicutes	c__Clostridia	o__Clostridiales	f__Ruminococcaceae	g__Ruminococcaceae_UCG-013	s__unclassified_g__Ruminococcaceae_UCG-013	OTU1694	0	0	0	0	0	0	0	0	0	0	0	0	0	0	0	1	3	0	0
d__Bacteria	k__norank_d__Bacteria	p__Bacteroidetes	c__Bacteroidia	o__Bacteroidales	f__Rikenellaceae	g__Rikenellaceae_RC9_gut_group	s__uncultured_bacterium_g__Rikenellaceae_RC9_gut_group	OTU1695	0	0	0	0	0	0	0	0	0	0	0	0	0	6	4	2	7	6	1
d__Bacteria	k__norank_d__Bacteria	p__Firmicutes	c__Clostridia	o__Clostridiales	f__Ruminococcaceae	g__Eubacterium]_coprostanoligenes_group	s__uncultured_organism_g__Eubacterium]_coprostanoligenes_group	OTU1696	0	0	0	0	0	0	0	0	0	0	0	0	7	1	0	2	15	2	0
d__Bacteria	k__norank_d__Bacteria	p__Bacteroidetes	c__Bacteroidia	o__Bacteroidales	f__unclassified_o__Bacteroidales	g__unclassified_o__Bacteroidales	s__unclassified_o__Bacteroidales	OTU1697	0	0	0	0	0	0	0	0	0	0	0	0	0	1	1	0	4	0	0
d__Bacteria	k__norank_d__Bacteria	p__Firmicutes	c__Clostridia	o__Clostridiales	f__Ruminococcaceae	g__Ruminococcaceae_UCG-014	s__unclassified_g__Ruminococcaceae_UCG-014	OTU1698	4	0	0	0	0	0	0	0	0	0	3	0	0	0	0	0	37	0	0
d__Bacteria	k__norank_d__Bacteria	p__Bacteroidetes	c__Bacteroidia	o__Bacteroidales	f__Bacteroidales_RF16_group	g__norank_f__Bacteroidales_RF16_group	s__uncultured_bacterium_g__norank_f__Bacteroidales_RF16_group	OTU1699	0	0	0	0	0	0	0	0	0	0	0	0	0	0	0	0	3	0	0
d__Bacteria	k__norank_d__Bacteria	p__Bacteroidetes	c__Bacteroidia	o__Chitinophagales	f__Chitinophagaceae	g__Vibrionimonas	s__uncultured_bacterium_g__Vibrionimonas	OTU17	13	20	15	21	16	13	12	6	11	3	55	45	0	0	0	0	0	0	0
d__Bacteria	k__norank_d__Bacteria	p__Firmicutes	c__Erysipelotrichia	o__Erysipelotrichales	f__Erysipelotrichaceae	g__norank_f__Erysipelotrichaceae	s__unclassified_g__norank	OTU170	2	0	0	0	1	0	0	0	0	0	0	0	0	0	0	0	0	0	0
d__Bacteria	k__norank_d__Bacteria	p__Firmicutes	c__Clostridia	o__Clostridiales	f__Ruminococcaceae	g__norank_f__Ruminococcaceae	s__uncultured_organism_g__norank_f__Ruminococcaceae	OTU1700	0	0	0	0	0	0	0	0	0	0	0	0	15	8	29	14	37	1	32
d__Bacteria	k__norank_d__Bacteria	p__Firmicutes	c__Clostridia	o__Clostridiales	f__Family_XIII	g__Family_XIII_AD3011_group	s__unclassified_g__Family_XIII_AD3011_group	OTU1701	0	0	0	0	0	0	0	0	0	0	0	0	0	14	0	0	4	0	1
d__Bacteria	k__norank_d__Bacteria	p__Firmicutes	c__Clostridia	o__Clostridiales	f__Ruminococcaceae	g__Ruminococcaceae_UCG-013	s__unclassified_g__Ruminococcaceae_UCG-013	OTU1702	0	0	0	0	0	0	0	0	0	0	0	0	0	0	0	0	3	0	0
d__Bacteria	k__norank_d__Bacteria	p__Bacteroidetes	c__Bacteroidia	o__Bacteroidales	f__Prevotellaceae	g__Prevotellaceae_NK3B31_group	s__uncultured_bacterium_g__Prevotellaceae_NK3B31_group	OTU1703	0	0	0	0	0	0	0	0	0	0	0	0	2	110	30	16	798	29	21
d__Bacteria	k__norank_d__Bacteria	p__Actinobacteria	c__Actinobacteria	o__Coriobacteriales	f__Eggerthellaceae	g__norank_f__Eggerthellaceae	s__uncultured_bacterium_g__norank_f__Eggerthellaceae	OTU1704	0	0	0	0	0	0	0	0	0	0	0	0	6	5	0	0	0	0	0
d__Bacteria	k__norank_d__Bacteria	p__Cyanobacteria	c__Melainabacteria	o__Gastranaerophilales	f__norank_o__Gastranaerophilales	g__norank_o__Gastranaerophilales	s__uncultured_bacterium_g__norank_o__Gastranaerophilales	OTU1705	0	0	0	0	0	0	0	0	0	0	0	0	0	0	0	0	1	0	3
d__Bacteria	k__norank_d__Bacteria	p__Spirochaetes	c__Spirochaetia	o__Spirochaetales	f__Spirochaetaceae	g__Treponema_2	s__uncultured_bacterium_g__Treponema_2	OTU1706	0	0	0	0	0	0	0	0	0	0	0	0	0	0	1	1	33	0	0
d__Bacteria	k__norank_d__Bacteria	p__Firmicutes	c__Clostridia	o__Clostridiales	f__Ruminococcaceae	g__Candidatus_Soleaferrea	s__Bittarella_massiliensis	OTU1707	0	0	0	0	0	0	0	0	0	0	0	0	0	0	1	1	1	0	0
d__Bacteria	k__norank_d__Bacteria	p__Firmicutes	c__Clostridia	o__Clostridiales	f__Lachnospiraceae	g__unclassified_f__Lachnospiraceae	s__unclassified_f__Lachnospiraceae	OTU1708	0	0	0	0	0	0	0	0	0	0	0	0	0	11	0	0	2	1	0
d__Bacteria	k__norank_d__Bacteria	p__Firmicutes	c__Negativicutes	o__Selenomonadales	f__Veillonellaceae	g__Anaerovibrio	s__uncultured_bacterium_g__Anaerovibrio	OTU1709	0	0	0	0	0	0	0	0	0	0	0	0	0	197	37	10	1322	50	18
d__Bacteria	k__norank_d__Bacteria	p__unclassified_k__norank_d__Bacteria	c__unclassified_k__norank_d__Bacteria	o__unclassified_k__norank_d__Bacteria	f__unclassified_k__norank_d__Bacteria	g__unclassified_k__norank_d__Bacteria	s__unclassified_k__norank_d__Bacteria	OTU171	1	0	0	0	0	0	0	0	0	0	0	0	0	0	0	0	0	0	0
d__Bacteria	k__norank_d__Bacteria	p__Firmicutes	c__Clostridia	o__Clostridiales	f__Ruminococcaceae	g__Ruminococcaceae_UCG-013	s__unclassified_g__Ruminococcaceae_UCG-013	OTU1710	0	0	0	0	0	0	0	0	0	0	0	0	0	28	0	0	0	0	0
d__Bacteria	k__norank_d__Bacteria	p__Firmicutes	c__Clostridia	o__Clostridiales	f__Ruminococcaceae	g__Ruminococcaceae_UCG-014	s__uncultured_bacterium_g__Ruminococcaceae_UCG-014	OTU1711	0	0	0	0	0	0	0	0	0	0	0	0	0	6	0	0	1	0	0
d__Bacteria	k__norank_d__Bacteria	p__Proteobacteria	c__Deltaproteobacteria	o__Desulfovibrionales	f__Desulfovibrionaceae	g__Mailhella	s__Mailhella_massiliensis	OTU1712	0	0	0	0	0	0	0	0	0	0	0	0	1	2	1	0	0	2	1
d__Bacteria	k__norank_d__Bacteria	p__Firmicutes	c__Clostridia	o__Clostridiales	f__Lachnospiraceae	g__Lachnospiraceae_NK4A136_group	s__unclassified_g__Lachnospiraceae_NK4A136_group	OTU1713	0	0	0	0	0	0	0	0	0	0	0	0	0	0	0	0	1	0	0
d__Bacteria	k__norank_d__Bacteria	p__Bacteroidetes	c__Bacteroidia	o__unclassified_c__Bacteroidia	f__unclassified_c__Bacteroidia	g__unclassified_c__Bacteroidia	s__unclassified_c__Bacteroidia	OTU1714	0	0	0	0	0	0	0	0	0	0	0	0	0	3	1	0	5	1	1
d__Bacteria	k__norank_d__Bacteria	p__Firmicutes	c__Clostridia	o__Clostridiales	f__Ruminococcaceae	g__Eubacterium]_coprostanoligenes_group	s__uncultured_bacterium_g__Eubacterium]_coprostanoligenes_group	OTU1715	0	0	0	0	0	0	0	0	0	0	0	0	0	0	0	0	3	0	0
d__Bacteria	k__norank_d__Bacteria	p__Proteobacteria	c__Alphaproteobacteria	o__Rickettsiales	f__Mitochondria	g__norank_f__Mitochondria	s__uncultured_rumen_bacterium_g__norank_f__Mitochondria	OTU1716	0	0	0	0	0	0	0	0	0	0	0	0	0	0	0	0	3	0	0
d__Bacteria	k__norank_d__Bacteria	p__Firmicutes	c__Clostridia	o__Clostridiales	f__Lachnospiraceae	g__unclassified_f__Lachnospiraceae	s__unclassified_f__Lachnospiraceae	OTU1717	0	0	0	0	0	0	0	0	0	0	0	0	0	0	0	0	117	5	1
d__Bacteria	k__norank_d__Bacteria	p__Firmicutes	c__Clostridia	o__Clostridiales	f__Ruminococcaceae	g__Ruminococcus_1	s__unclassified_g__Ruminococcus_1	OTU1718	0	0	0	0	0	0	0	0	0	0	0	0	0	0	0	0	1	0	0
d__Bacteria	k__norank_d__Bacteria	p__Spirochaetes	c__Spirochaetia	o__Spirochaetales	f__Spirochaetaceae	g__Treponema_2	s__uncultured_bacterium_g__Treponema_2	OTU1719	0	0	0	0	0	0	0	0	0	0	0	0	0	0	0	2	297	0	0
d__Bacteria	k__norank_d__Bacteria	p__Patescibacteria	c__Saccharimonadia	o__Saccharimonadales	f__Saccharimonadaceae	g__Candidatus_Saccharimonas	s__uncultured_bacterium_g__Candidatus_Saccharimonas	OTU172	49	0	0	0	0	0	0	0	0	0	0	0	0	0	0	0	0	0	0
d__Bacteria	k__norank_d__Bacteria	p__Firmicutes	c__Clostridia	o__Clostridiales	f__Ruminococcaceae	g__Ruminococcaceae_UCG-009	s__uncultured_bacterium_g__Ruminococcaceae_UCG-009	OTU1720	0	0	0	0	0	0	0	0	0	0	0	0	0	10	0	0	31	5	6
d__Bacteria	k__norank_d__Bacteria	p__Cyanobacteria	c__Melainabacteria	o__Gastranaerophilales	f__norank_o__Gastranaerophilales	g__norank_o__Gastranaerophilales	s__uncultured_bacterium_g__norank_o__Gastranaerophilales	OTU1721	0	0	0	0	0	0	0	0	0	0	0	0	1	0	6	4	8	0	5
d__Bacteria	k__norank_d__Bacteria	p__Firmicutes	c__Erysipelotrichia	o__Erysipelotrichales	f__Erysipelotrichaceae	g__norank_f__Erysipelotrichaceae	s__uncultured_bacterium_g__norank_f__Erysipelotrichaceae	OTU1722	0	0	0	0	0	0	0	0	0	0	0	0	0	2	0	0	13	0	0
d__Bacteria	k__norank_d__Bacteria	p__Bacteroidetes	c__Bacteroidia	o__Bacteroidales	f__Muribaculaceae	g__norank_f__Muribaculaceae	s__uncultured_bacterium_g__norank_f__Muribaculaceae	OTU1723	0	0	0	0	0	0	1	0	0	0	0	0	0	0	0	0	1	0	0
d__Bacteria	k__norank_d__Bacteria	p__Firmicutes	c__Clostridia	o__Clostridiales	f__Ruminococcaceae	g__unclassified_f__Ruminococcaceae	s__unclassified_f__Ruminococcaceae	OTU1724	0	0	0	0	0	0	0	0	0	0	0	0	0	3	1	2	2	2	0
d__Bacteria	k__norank_d__Bacteria	p__Bacteroidetes	c__Bacteroidia	o__Bacteroidales	f__Prevotellaceae	g__unclassified_f__Prevotellaceae	s__unclassified_f__Prevotellaceae	OTU1725	0	0	0	0	0	0	0	0	0	0	0	0	0	4	3	0	33	1	3
d__Bacteria	k__norank_d__Bacteria	p__Firmicutes	c__Clostridia	o__Clostridiales	f__Ruminococcaceae	g__Ruminococcaceae_UCG-010	s__unclassified_g__Ruminococcaceae_UCG-010	OTU1726	0	0	0	0	0	0	0	0	0	0	0	0	0	3	1	0	1	0	0
d__Bacteria	k__norank_d__Bacteria	p__Bacteroidetes	c__Bacteroidia	o__Bacteroidales	f__Prevotellaceae	g__Prevotella_1	s__unclassified_g__Prevotella_1	OTU1727	0	0	0	0	0	0	0	0	0	0	0	0	0	3	1	2	23	0	2
d__Bacteria	k__norank_d__Bacteria	p__Bacteroidetes	c__Bacteroidia	o__Bacteroidales	f__Rikenellaceae	g__Rikenellaceae_RC9_gut_group	s__uncultured_Bacteroidales_bacterium_g__Rikenellaceae_RC9_gut_group	OTU1728	0	0	0	0	0	0	0	0	0	0	0	0	0	0	0	1	7	0	0
d__Bacteria	k__norank_d__Bacteria	p__Firmicutes	c__Clostridia	o__Clostridiales	f__Lachnospiraceae	g__unclassified_f__Lachnospiraceae	s__unclassified_f__Lachnospiraceae	OTU173	2	0	0	0	0	0	0	0	0	0	0	0	0	0	0	0	0	0	0
d__Bacteria	k__norank_d__Bacteria	p__Firmicutes	c__Clostridia	o__Clostridiales	f__Lachnospiraceae	g__Acetitomaculum	s__Firmicutes_bacterium_CAG_194_44_15	OTU1730	0	0	0	0	0	0	0	0	0	0	0	0	0	19	0	0	4	0	1
d__Bacteria	k__norank_d__Bacteria	p__Bacteroidetes	c__Bacteroidia	o__Bacteroidales	f__Paludibacteraceae	g__norank_f__Paludibacteraceae	s__unclassified_g__norank_f__Paludibacteraceae	OTU1731	0	0	0	0	0	0	0	0	0	0	0	0	0	0	0	0	13	0	3
d__Bacteria	k__norank_d__Bacteria	p__Tenericutes	c__Mollicutes	o__Anaeroplasmatales	f__Anaeroplasmataceae	g__Anaeroplasma	s__uncultured_rumen_bacterium_g__Anaeroplasma	OTU1732	0	0	0	0	0	0	0	0	0	0	0	0	0	0	0	0	14	0	0
d__Bacteria	k__norank_d__Bacteria	p__Firmicutes	c__Clostridia	o__Clostridiales	f__Ruminococcaceae	g__Ruminococcaceae_UCG-010	s__uncultured_bacterium_g__Ruminococcaceae_UCG-010	OTU1733	0	0	0	0	0	0	0	0	0	0	0	0	0	2	0	0	2	1	0
d__Bacteria	k__norank_d__Bacteria	p__Firmicutes	c__Clostridia	o__Clostridiales	f__Christensenellaceae	g__Christensenellaceae_R-7_group	s__uncultured_bacterium_g__Christensenellaceae_R-7_group	OTU1734	0	0	0	0	0	0	0	0	0	0	0	0	0	1	0	0	1	0	1
d__Bacteria	k__norank_d__Bacteria	p__Firmicutes	c__Clostridia	o__Clostridiales	f__Clostridiales_vadinBB60_group	g__norank_f__Clostridiales_vadinBB60_group	s__metagenome_g__norank_f__Clostridiales_vadinBB60_group	OTU1735	0	0	0	0	0	0	0	0	0	0	0	0	0	6	0	1	6	1	1
d__Bacteria	k__norank_d__Bacteria	p__Verrucomicrobia	c__Verrucomicrobiae	o__Verrucomicrobiales	f__Akkermansiaceae	g__Akkermansia	s__uncultured_bacterium_g__Akkermansia	OTU1736	0	0	0	0	0	0	0	0	0	0	0	0	0	0	0	0	7	0	0
d__Bacteria	k__norank_d__Bacteria	p__Bacteroidetes	c__Bacteroidia	o__Bacteroidales	f__Bacteroidaceae	g__Bacteroides	s__unclassified_g__Bacteroides	OTU1737	0	0	0	0	0	0	0	0	0	0	0	0	0	6	0	1	1	0	0
d__Bacteria	k__norank_d__Bacteria	p__Bacteroidetes	c__Bacteroidia	o__Bacteroidales	f__Prevotellaceae	g__Prevotellaceae_NK3B31_group	s__uncultured_bacterium_g__Prevotellaceae_NK3B31_group	OTU1738	0	0	0	0	0	0	0	0	0	0	0	0	6	141	16	24	79	12	9
d__Bacteria	k__norank_d__Bacteria	p__Proteobacteria	c__Gammaproteobacteria	o__Betaproteobacteriales	f__unclassified_o__Betaproteobacteriales	g__unclassified_o__Betaproteobacteriales	s__unclassified_o__Betaproteobacteriales	OTU1739	0	0	0	0	0	0	0	0	0	0	0	0	0	0	0	0	1	1	0
d__Bacteria	k__norank_d__Bacteria	p__Proteobacteria	c__Gammaproteobacteria	o__Betaproteobacteriales	f__Nitrosomonadaceae	g__MND1	s__unclassified_g__MND1	OTU174	2	0	0	0	0	0	0	0	0	0	0	0	0	0	0	0	0	0	0
d__Bacteria	k__norank_d__Bacteria	p__Bacteroidetes	c__Bacteroidia	o__Bacteroidales	f__Rikenellaceae	g__dgA-11_gut_group	s__uncultured_Bacteroidales_bacterium_g__dgA-11_gut_group	OTU1740	0	0	0	0	0	0	0	0	0	0	0	0	0	15	1	10	75	1	4
d__Bacteria	k__norank_d__Bacteria	p__Bacteroidetes	c__Bacteroidia	o__Bacteroidales	f__Rikenellaceae	g__Rikenellaceae_RC9_gut_group	s__uncultured_beta_proteobacterium_g__Rikenellaceae_RC9_gut_group	OTU1741	0	0	0	0	0	0	0	0	0	0	0	0	1	35	6	8	39	6	9
d__Bacteria	k__norank_d__Bacteria	p__Bacteroidetes	c__Bacteroidia	o__Bacteroidales	f__Tannerellaceae	g__Parabacteroides	s__Porphyromonadaceae_bacterium_DJF_B175	OTU1742	0	0	0	0	0	0	0	0	0	0	0	0	14	91	20	13	63	39	31
d__Bacteria	k__norank_d__Bacteria	p__Firmicutes	c__Clostridia	o__Clostridiales	f__Ruminococcaceae	g__Ruminococcaceae_UCG-013	s__unclassified_g__Ruminococcaceae_UCG-013	OTU1743	0	0	0	0	0	0	0	0	0	0	0	0	0	0	0	0	3	0	0
d__Bacteria	k__norank_d__Bacteria	p__Bacteroidetes	c__Bacteroidia	o__Bacteroidales	f__Rikenellaceae	g__Rikenellaceae_RC9_gut_group	s__uncultured_bacterium_g__Rikenellaceae_RC9_gut_group	OTU1744	0	0	0	0	0	0	0	0	0	0	0	0	0	32	0	0	9	1	0
d__Bacteria	k__norank_d__Bacteria	p__Bacteroidetes	c__Bacteroidia	o__Bacteroidales	f__Prevotellaceae	g__unclassified_f__Prevotellaceae	s__unclassified_f__Prevotellaceae	OTU1745	0	0	0	0	0	0	0	0	0	0	0	0	0	5	13	1	5	0	3
d__Bacteria	k__norank_d__Bacteria	p__Bacteroidetes	c__Bacteroidia	o__Bacteroidales	f__Rikenellaceae	g__Rikenellaceae_RC9_gut_group	s__uncultured_Bacteroidales_bacterium_g__Rikenellaceae_RC9_gut_group	OTU1746	0	0	0	0	0	0	0	0	0	0	0	0	0	361	9	3	82	5	0
d__Bacteria	k__norank_d__Bacteria	p__Bacteroidetes	c__Bacteroidia	o__Bacteroidales	f__Rikenellaceae	g__Rikenellaceae_RC9_gut_group	s__uncultured_bacterium_g__Rikenellaceae_RC9_gut_group	OTU1747	0	0	0	0	0	0	0	0	0	0	0	0	43	93	31	39	61	60	24
d__Bacteria	k__norank_d__Bacteria	p__Bacteroidetes	c__Bacteroidia	o__Bacteroidales	f__Prevotellaceae	g__unclassified_f__Prevotellaceae	s__unclassified_f__Prevotellaceae	OTU1748	0	0	0	0	0	0	0	0	0	0	0	0	0	0	1	0	525	0	3
d__Bacteria	k__norank_d__Bacteria	p__Firmicutes	c__Clostridia	o__Clostridiales	f__Family_XIII	g__unclassified_f__Family_XIII	s__unclassified_f__Family_XIII	OTU1749	0	0	0	0	0	0	0	0	0	0	0	0	0	2	1	0	1	0	0
d__Bacteria	k__norank_d__Bacteria	p__Proteobacteria	c__Alphaproteobacteria	o__norank_c__Alphaproteobacteria	f__norank_c__Alphaproteobacteria	g__norank_c__Alphaproteobacteria	s__uncultured_bacterium_g__norank_c__Alphaproteobacteria	OTU175	2	0	0	0	0	0	0	0	0	0	0	0	0	0	0	0	0	0	0
d__Bacteria	k__norank_d__Bacteria	p__Firmicutes	c__Clostridia	o__Clostridiales	f__Lachnospiraceae	g__unclassified_f__Lachnospiraceae	s__unclassified_f__Lachnospiraceae	OTU1750	5	0	0	0	0	1	6	9	0	1	0	0	0	28	16	48	6	10	9
d__Bacteria	k__norank_d__Bacteria	p__Bacteroidetes	c__Bacteroidia	o__Bacteroidales	f__Prevotellaceae	g__unclassified_f__Prevotellaceae	s__unclassified_f__Prevotellaceae	OTU1751	0	0	0	0	0	0	0	0	0	0	0	0	0	0	0	0	10	0	0
d__Bacteria	k__norank_d__Bacteria	p__Actinobacteria	c__Actinobacteria	o__Coriobacteriales	f__Eggerthellaceae	g__Slackia	s__unclassified_g__Slackia	OTU1752	0	0	0	0	0	0	0	0	0	0	0	0	0	3	3	0	2	0	5
d__Bacteria	k__norank_d__Bacteria	p__Bacteroidetes	c__Bacteroidia	o__Bacteroidales	f__Rikenellaceae	g__Rikenellaceae_RC9_gut_group	s__uncultured_bacterium_g__Rikenellaceae_RC9_gut_group	OTU1753	0	0	0	0	0	0	0	0	0	0	0	0	0	3	0	0	2	0	0
d__Bacteria	k__norank_d__Bacteria	p__Bacteroidetes	c__Bacteroidia	o__Bacteroidales	f__Bacteroidaceae	g__Bacteroides	s__unclassified_g__Bacteroides	OTU1754	0	0	0	0	0	0	0	0	0	0	0	0	0	0	0	0	12	0	0
d__Bacteria	k__norank_d__Bacteria	p__Bacteroidetes	c__Bacteroidia	o__Bacteroidales	f__Prevotellaceae	g__Prevotellaceae_NK3B31_group	s__uncultured_bacterium_g__Prevotellaceae_NK3B31_group	OTU1755	0	0	0	0	0	0	0	0	0	0	0	0	0	18	19	2	53	24	21
d__Bacteria	k__norank_d__Bacteria	p__Bacteroidetes	c__Bacteroidia	o__Bacteroidales	f__Rikenellaceae	g__Rikenellaceae_RC9_gut_group	s__uncultured_bacterium_g__Rikenellaceae_RC9_gut_group	OTU1756	0	0	0	0	0	0	0	0	0	0	0	0	0	7	0	0	10	1	0
d__Bacteria	k__norank_d__Bacteria	p__Firmicutes	c__Clostridia	o__Clostridiales	f__Ruminococcaceae	g__Eubacterium]_coprostanoligenes_group	s__unclassified_g__Eubacterium]_coprostanoligenes_group	OTU1757	0	0	0	0	0	0	0	0	0	0	0	0	0	0	0	0	1	1	0
d__Bacteria	k__norank_d__Bacteria	p__Tenericutes	c__Mollicutes	o__Mollicutes_RF39	f__norank_o__Mollicutes_RF39	g__norank_o__Mollicutes_RF39	s__uncultured_bacterium_g__norank_o__Mollicutes_RF39	OTU1758	0	0	0	0	0	0	0	0	0	0	0	0	0	0	0	0	5	0	0
d__Bacteria	k__norank_d__Bacteria	p__Bacteroidetes	c__Bacteroidia	o__Bacteroidales	f__Prevotellaceae	g__unclassified_f__Prevotellaceae	s__unclassified_f__Prevotellaceae	OTU1759	0	0	0	0	0	0	0	0	0	0	0	0	0	27	4	0	49	4	9
d__Bacteria	k__norank_d__Bacteria	p__Acidobacteria	c__Subgroup_6	o__norank_c__Subgroup_6	f__norank_c__Subgroup_6	g__norank_c__Subgroup_6	s__unclassified_g__norank_c__Subgroup_6	OTU176	1	0	0	0	0	0	0	0	0	0	0	0	0	0	0	0	0	0	0
d__Bacteria	k__norank_d__Bacteria	p__Firmicutes	c__Erysipelotrichia	o__Erysipelotrichales	f__Erysipelotrichaceae	g__Erysipelotrichaceae_UCG-004	s__uncultured_bacterium_g__Erysipelotrichaceae_UCG-004	OTU1760	0	0	0	0	0	0	0	0	0	0	0	0	0	0	0	0	2	0	0
d__Bacteria	k__norank_d__Bacteria	p__Spirochaetes	c__Spirochaetia	o__Spirochaetales	f__Spirochaetaceae	g__Treponema_2	s__unclassified_g__Treponema_2	OTU1761	0	0	0	0	0	0	0	0	0	0	0	0	0	0	0	0	6	0	0
d__Bacteria	k__norank_d__Bacteria	p__Bacteroidetes	c__Bacteroidia	o__Bacteroidales	f__Prevotellaceae	g__Prevotellaceae_UCG-004	s__uncultured_bacterium_g__Prevotellaceae_UCG-004	OTU1762	0	0	0	0	0	0	0	0	0	0	0	0	0	5	0	0	8	0	0
d__Bacteria	k__norank_d__Bacteria	p__Bacteroidetes	c__Bacteroidia	o__Bacteroidales	f__Prevotellaceae	g__Prevotellaceae_NK3B31_group	s__uncultured_bacterium_g__Prevotellaceae_NK3B31_group	OTU1763	0	0	0	0	0	0	0	0	0	0	0	0	0	2	11	51	229	13	7
d__Bacteria	k__norank_d__Bacteria	p__Firmicutes	c__Clostridia	o__Clostridiales	f__Ruminococcaceae	g__unclassified_f__Ruminococcaceae	s__unclassified_f__Ruminococcaceae	OTU1764	0	0	0	0	0	0	0	0	0	0	0	0	0	1	0	0	5	0	0
d__Bacteria	k__norank_d__Bacteria	p__Firmicutes	c__Clostridia	o__Clostridiales	f__Ruminococcaceae	g__Ruminococcus_1	s__unclassified_g__Ruminococcus_1	OTU1765	0	0	0	0	0	0	0	0	0	0	0	0	0	6	1	7	12	6	4
d__Bacteria	k__norank_d__Bacteria	p__Bacteroidetes	c__Bacteroidia	o__Bacteroidales	f__Prevotellaceae	g__unclassified_f__Prevotellaceae	s__unclassified_f__Prevotellaceae	OTU1766	0	0	0	0	0	0	0	0	0	0	0	0	0	0	0	0	10	0	5
d__Bacteria	k__norank_d__Bacteria	p__Firmicutes	c__Clostridia	o__Clostridiales	f__Ruminococcaceae	g__Eubacterium]_coprostanoligenes_group	s__unclassified_g__Eubacterium]_coprostanoligenes_group	OTU1767	0	0	0	0	0	0	0	0	0	0	0	0	0	0	0	0	1	0	0
d__Bacteria	k__norank_d__Bacteria	p__Firmicutes	c__Clostridia	o__Clostridiales	f__Ruminococcaceae	g__Ruminococcaceae_UCG-014	s__unclassified_g__Ruminococcaceae_UCG-014	OTU1768	6	0	0	0	0	1	1	0	0	0	0	0	25	182	24	1	260	0	12
d__Bacteria	k__norank_d__Bacteria	p__Epsilonbacteraeota	c__Campylobacteria	o__Campylobacterales	f__Helicobacteraceae	g__Helicobacter	s__unclassified_g__Helicobacter	OTU1769	0	0	0	0	0	0	0	0	0	0	0	0	0	0	2	0	1	1	0
d__Bacteria	k__norank_d__Bacteria	p__Firmicutes	c__Bacilli	o__Lactobacillales	f__Lactobacillaceae	g__Lactobacillus	s__Lactobacillus_iners_DSM_13335	OTU177	3	0	0	0	0	0	0	0	0	0	0	0	0	0	0	0	0	0	0
d__Bacteria	k__norank_d__Bacteria	p__Bacteroidetes	c__Bacteroidia	o__Bacteroidales	f__Prevotellaceae	g__unclassified_f__Prevotellaceae	s__unclassified_f__Prevotellaceae	OTU1770	0	0	0	0	0	0	0	0	0	0	0	0	0	0	0	0	39	0	3
d__Bacteria	k__norank_d__Bacteria	p__Firmicutes	c__Clostridia	o__Clostridiales	f__Ruminococcaceae	g__Ruminococcaceae_UCG-010	s__unclassified_g__Ruminococcaceae_UCG-010	OTU1771	0	0	0	0	0	0	0	0	0	0	0	0	1	4	0	0	2	0	1
d__Bacteria	k__norank_d__Bacteria	p__Firmicutes	c__Clostridia	o__Clostridiales	f__Ruminococcaceae	g__Ruminococcaceae_UCG-010	s__unclassified_g__Ruminococcaceae_UCG-010	OTU1772	0	0	0	0	0	0	0	0	0	0	0	0	0	5	0	0	2	0	0
d__Bacteria	k__norank_d__Bacteria	p__Tenericutes	c__Mollicutes	o__Anaeroplasmatales	f__Anaeroplasmataceae	g__Anaeroplasma	s__uncultured_rumen_bacterium_g__Anaeroplasma	OTU1773	0	0	0	0	0	0	0	0	0	0	0	0	0	0	0	0	9	1	0
d__Bacteria	k__norank_d__Bacteria	p__Bacteroidetes	c__Bacteroidia	o__Bacteroidales	f__norank_o__Bacteroidales	g__norank_o__Bacteroidales	s__uncultured_bacterium_g__norank_o__Bacteroidales	OTU1774	0	0	0	0	0	0	0	0	0	0	0	0	20	10	23	71	80	22	39
d__Bacteria	k__norank_d__Bacteria	p__Firmicutes	c__Clostridia	o__Clostridiales	f__Ruminococcaceae	g__Ruminococcus_2	s__uncultured_Ruminococcaceae_bacterium_g__Ruminococcus_2	OTU1775	0	0	0	0	0	0	0	0	0	0	0	0	164	6	3	3	211	5	181
d__Bacteria	k__norank_d__Bacteria	p__Firmicutes	c__Clostridia	o__Clostridiales	f__Ruminococcaceae	g__Ruminococcaceae_UCG-005	s__unclassified_g__Ruminococcaceae_UCG-005	OTU1776	0	0	0	0	0	0	0	0	0	0	0	0	0	46	1	0	33	2	3
d__Bacteria	k__norank_d__Bacteria	p__Firmicutes	c__Clostridia	o__Clostridiales	f__Ruminococcaceae	g__Eubacterium]_coprostanoligenes_group	s__unclassified_g__Eubacterium]_coprostanoligenes_group	OTU1777	0	0	0	0	0	0	0	0	0	0	0	0	0	0	0	0	13	0	0
d__Bacteria	k__norank_d__Bacteria	p__Firmicutes	c__Clostridia	o__Clostridiales	f__Ruminococcaceae	g__CAG-352	s__uncultured_bacterium_g__CAG-352	OTU1778	0	0	0	0	0	0	0	0	0	0	0	0	0	0	0	0	2	0	0
d__Bacteria	k__norank_d__Bacteria	p__Firmicutes	c__Clostridia	o__Clostridiales	f__Ruminococcaceae	g__Ruminococcaceae_UCG-010	s__uncultured_bacterium_g__Ruminococcaceae_UCG-010	OTU1779	0	0	0	0	0	0	0	0	0	0	0	0	0	0	0	0	4	0	0
d__Bacteria	k__norank_d__Bacteria	p__Firmicutes	c__Clostridia	o__Clostridiales	f__Lachnospiraceae	g__norank_f__Lachnospiraceae	s__uncultured_bacterium_g__norank_f__Lachnospiraceae	OTU178	1	0	0	0	0	0	0	0	0	0	0	0	0	0	0	0	0	0	0
d__Bacteria	k__norank_d__Bacteria	p__Firmicutes	c__Clostridia	o__Clostridiales	f__Ruminococcaceae	g__Ruminococcaceae_UCG-010	s__uncultured_bacterium_g__Ruminococcaceae_UCG-010	OTU1780	0	0	0	0	0	0	0	0	0	0	0	0	2	7	8	5	8	3	0
d__Bacteria	k__norank_d__Bacteria	p__Bacteroidetes	c__Bacteroidia	o__Bacteroidales	f__Prevotellaceae	g__unclassified_f__Prevotellaceae	s__unclassified_f__Prevotellaceae	OTU1781	0	0	0	0	0	0	0	0	0	0	0	0	0	3	5	0	19	0	3
d__Bacteria	k__norank_d__Bacteria	p__Firmicutes	c__Clostridia	o__Clostridiales	f__Ruminococcaceae	g__Ruminococcaceae_UCG-010	s__uncultured_bacterium_g__Ruminococcaceae_UCG-010	OTU1782	0	0	0	0	0	0	0	0	0	0	0	0	0	0	0	0	2	0	3
d__Bacteria	k__norank_d__Bacteria	p__Firmicutes	c__Clostridia	o__Clostridiales	f__Ruminococcaceae	g__Negativibacillus	s__uncultured_bacterium_g__Negativibacillus	OTU1783	0	0	0	0	0	0	1	0	0	0	0	0	28	16	7	28	24	26	15
d__Bacteria	k__norank_d__Bacteria	p__Bacteroidetes	c__Bacteroidia	o__Bacteroidales	f__Prevotellaceae	g__Prevotellaceae_NK3B31_group	s__uncultured_bacterium_g__Prevotellaceae_NK3B31_group	OTU1784	0	0	0	0	0	0	0	0	0	0	0	0	0	47	6	2	40	5	3
d__Bacteria	k__norank_d__Bacteria	p__Bacteroidetes	c__Bacteroidia	o__Bacteroidales	f__Bacteroidales_RF16_group	g__norank_f__Bacteroidales_RF16_group	s__uncultured_bacterium_g__norank_f__Bacteroidales_RF16_group	OTU1785	0	0	0	0	0	0	0	0	0	0	0	0	0	0	0	0	3	0	0
d__Bacteria	k__norank_d__Bacteria	p__Firmicutes	c__Clostridia	o__Clostridiales	f__Lachnospiraceae	g__Lachnoclostridium	s__unclassified_g__Lachnoclostridium	OTU1786	9	0	0	0	0	0	0	0	0	0	0	0	8	74	89	67	49	84	27
d__Bacteria	k__norank_d__Bacteria	p__Bacteroidetes	c__Bacteroidia	o__Bacteroidales	f__Muribaculaceae	g__norank_f__Muribaculaceae	s__uncultured_bacterium_g__norank_f__Muribaculaceae	OTU1787	0	0	0	0	0	0	0	0	0	0	0	0	2	0	1	1	7	0	4
d__Bacteria	k__norank_d__Bacteria	p__Firmicutes	c__Clostridia	o__Clostridiales	f__Ruminococcaceae	g__Pygmaiobacter	s__uncultured_bacterium_g__Pygmaiobacter	OTU1788	0	0	0	0	0	0	0	0	0	0	0	0	1	1	4	1	4	2	5
d__Bacteria	k__norank_d__Bacteria	p__Firmicutes	c__Clostridia	o__Clostridiales	f__Ruminococcaceae	g__norank_f__Ruminococcaceae	s__unclassified_g__norank_f__Ruminococcaceae	OTU1789	0	0	0	0	0	0	0	0	0	0	0	0	0	0	0	0	15	0	0
d__Bacteria	k__norank_d__Bacteria	p__Bacteroidetes	c__Bacteroidia	o__Bacteroidales	f__Prevotellaceae	g__Alloprevotella	s__uncultured_Bacteroidales_bacterium_g__Alloprevotella	OTU179	80	0	0	1	0	0	0	0	0	3	4	10	0	0	0	0	0	0	0
d__Bacteria	k__norank_d__Bacteria	p__Cyanobacteria	c__Melainabacteria	o__Gastranaerophilales	f__norank_o__Gastranaerophilales	g__norank_o__Gastranaerophilales	s__uncultured_bacterium_g__norank_o__Gastranaerophilales	OTU1790	0	0	0	0	0	0	0	0	0	0	0	0	0	0	0	0	2	1	0
d__Bacteria	k__norank_d__Bacteria	p__Firmicutes	c__Clostridia	o__Clostridiales	f__Ruminococcaceae	g__Negativibacillus	s__uncultured_bacterium_g__Negativibacillus	OTU1791	0	0	0	0	0	0	0	0	0	0	0	0	0	4	2	1	14	2	4
d__Bacteria	k__norank_d__Bacteria	p__Tenericutes	c__Mollicutes	o__Mollicutes_RF39	f__norank_o__Mollicutes_RF39	g__norank_o__Mollicutes_RF39	s__uncultured_bacterium_g__norank_o__Mollicutes_RF39	OTU1792	0	0	0	0	0	0	0	0	0	0	0	0	0	0	0	0	1	0	0
d__Bacteria	k__norank_d__Bacteria	p__Firmicutes	c__Clostridia	o__Clostridiales	f__Ruminococcaceae	g__Ruminococcaceae_UCG-009	s__uncultured_bacterium_g__Ruminococcaceae_UCG-009	OTU1793	0	0	0	0	0	0	0	0	0	0	0	0	0	9	0	0	11	0	1
d__Bacteria	k__norank_d__Bacteria	p__Tenericutes	c__Mollicutes	o__Mollicutes_RF39	f__norank_o__Mollicutes_RF39	g__norank_o__Mollicutes_RF39	s__uncultured_bacterium_g__norank_o__Mollicutes_RF39	OTU1794	0	0	0	0	0	0	0	0	0	0	0	0	1	15	0	0	5	2	0
d__Bacteria	k__norank_d__Bacteria	p__Firmicutes	c__Clostridia	o__Clostridiales	f__Ruminococcaceae	g__Ruminococcaceae_UCG-001	s__uncultured_bacterium_g__Ruminococcaceae_UCG-001	OTU1795	0	0	0	0	0	0	0	0	0	0	0	0	0	1	0	0	2	7	0
d__Bacteria	k__norank_d__Bacteria	p__Firmicutes	c__Clostridia	o__Clostridiales	f__Ruminococcaceae	g__Ruminococcaceae_UCG-013	s__uncultured_bacterium_g__Ruminococcaceae_UCG-013	OTU1796	0	0	0	0	0	0	0	0	0	0	0	0	0	0	0	0	28	0	0
d__Bacteria	k__norank_d__Bacteria	p__Spirochaetes	c__Spirochaetia	o__Spirochaetales	f__Spirochaetaceae	g__Treponema_2	s__uncultured_bacterium_g__Treponema_2	OTU1797	0	0	0	0	0	0	0	0	0	0	0	0	0	4	0	0	20	0	0
d__Bacteria	k__norank_d__Bacteria	p__Spirochaetes	c__Spirochaetia	o__Spirochaetales	f__Spirochaetaceae	g__Treponema_2	s__unclassified_g__Treponema_2	OTU1798	0	0	0	0	0	0	0	0	0	0	0	0	0	0	0	0	75	1	0
d__Bacteria	k__norank_d__Bacteria	p__Firmicutes	c__Clostridia	o__Clostridiales	f__Ruminococcaceae	g__Ruminococcaceae_UCG-010	s__unclassified_g__Ruminococcaceae_UCG-010	OTU1799	0	0	0	0	0	0	0	0	0	0	0	0	0	1	0	0	6	0	0
d__Bacteria	k__norank_d__Bacteria	p__Bacteroidetes	c__Bacteroidia	o__Bacteroidales	f__Muribaculaceae	g__norank_f__Muribaculaceae	s__uncultured_Bacteroidales_bacterium_g__norank_f__Muribaculaceae	OTU18	415	0	0	12	1	2	4	1	1	4	10	16	0	0	0	2	0	0	0
d__Bacteria	k__norank_d__Bacteria	p__Proteobacteria	c__Alphaproteobacteria	o__Rickettsiales	f__Mitochondria	g__norank_f__Mitochondria	s__unclassified_g__norank_f__Mitochondria	OTU180	2	0	0	0	0	0	0	0	0	0	0	0	0	0	0	0	0	0	0
d__Bacteria	k__norank_d__Bacteria	p__Spirochaetes	c__Spirochaetia	o__Spirochaetales	f__Spirochaetaceae	g__Treponema_2	s__uncultured_bacterium_g__Treponema_2	OTU1800	0	0	0	0	0	0	0	0	0	0	0	0	0	112	0	0	37	0	0
d__Bacteria	k__norank_d__Bacteria	p__Firmicutes	c__Clostridia	o__Clostridiales	f__Ruminococcaceae	g__Ruminococcaceae_UCG-010	s__unclassified_g__Ruminococcaceae_UCG-010	OTU1801	0	0	0	0	0	0	0	0	0	0	0	0	0	2	0	0	3	0	0
d__Bacteria	k__norank_d__Bacteria	p__Spirochaetes	c__Spirochaetia	o__Spirochaetales	f__Spirochaetaceae	g__Treponema_2	s__uncultured_bacterium_g__Treponema_2	OTU1802	0	0	0	0	0	0	0	0	0	0	0	0	0	6	0	0	52	0	0
d__Bacteria	k__norank_d__Bacteria	p__Firmicutes	c__Clostridia	o__Clostridiales	f__Ruminococcaceae	g__Ruminococcaceae_UCG-014	s__uncultured_Ruminococcaceae_bacterium_g__Ruminococcaceae_UCG-014	OTU1803	14	0	0	0	0	0	0	0	0	0	0	0	406	410	181	370	540	148	195
d__Bacteria	k__norank_d__Bacteria	p__Firmicutes	c__Clostridia	o__Clostridiales	f__Ruminococcaceae	g__Ruminococcaceae_NK4A214_group	s__uncultured_rumen_bacterium_g__Ruminococcaceae_NK4A214_group	OTU1804	1	0	0	0	0	0	0	0	0	0	0	2	27	170	27	49	144	50	7
d__Bacteria	k__norank_d__Bacteria	p__Firmicutes	c__Clostridia	o__Clostridiales	f__Family_XIII	g__Eubacterium]_brachy_group	s__unclassified_g__Eubacterium]_brachy_group	OTU1805	0	0	0	0	0	0	0	0	0	0	0	0	1	0	0	1	0	10	0
d__Bacteria	k__norank_d__Bacteria	p__Firmicutes	c__Clostridia	o__Clostridiales	f__Lachnospiraceae	g__Lachnospiraceae_ND3007_group	s__uncultured_bacterium_g__Lachnospiraceae_ND3007_group	OTU1806	0	0	0	0	0	0	0	0	0	0	0	0	0	0	0	2	1	4	2
d__Bacteria	k__norank_d__Bacteria	p__Firmicutes	c__Clostridia	o__Clostridiales	f__Ruminococcaceae	g__unclassified_f__Ruminococcaceae	s__unclassified_f__Ruminococcaceae	OTU1807	0	0	0	0	0	0	0	0	0	0	0	0	0	0	0	0	0	3	0
d__Bacteria	k__norank_d__Bacteria	p__Firmicutes	c__Clostridia	o__Clostridiales	f__Lachnospiraceae	g__Blautia	s__unclassified_g__Blautia	OTU1808	1	0	1	0	0	0	0	0	0	0	1	2	76	43	83	81	17	47	60
d__Bacteria	k__norank_d__Bacteria	p__Firmicutes	c__Clostridia	o__Clostridiales	f__Ruminococcaceae	g__Flavonifractor	s__unclassified_g__Flavonifractor	OTU1809	3	0	0	0	0	0	0	0	0	0	0	0	4	2	3	4	14	10	2
d__Bacteria	k__norank_d__Bacteria	p__Proteobacteria	c__Gammaproteobacteria	o__Betaproteobacteriales	f__Burkholderiaceae	g__Cupriavidus	s__uncultured_Cupriavidus_sp._g__Cupriavidus	OTU181	33	0	0	0	0	1	35	23	16	0	75	22	0	0	0	0	0	0	0
d__Bacteria	k__norank_d__Bacteria	p__Firmicutes	c__Erysipelotrichia	o__Erysipelotrichales	f__Erysipelotrichaceae	g__Asteroleplasma	s__uncultured_bacterium_g__Asteroleplasma	OTU1810	0	0	0	0	0	0	0	0	0	0	0	0	0	2	0	2	1	4	1
d__Bacteria	k__norank_d__Bacteria	p__Firmicutes	c__Clostridia	o__Clostridiales	f__Ruminococcaceae	g__Ruminococcaceae_UCG-010	s__uncultured_bacterium_g__Ruminococcaceae_UCG-010	OTU1811	0	0	0	0	0	0	0	0	0	0	0	0	0	2	0	3	19	10	3
d__Bacteria	k__norank_d__Bacteria	p__Bacteroidetes	c__Bacteroidia	o__Bacteroidales	f__Muribaculaceae	g__norank_f__Muribaculaceae	s__uncultured_bacterium_g__norank_f__Muribaculaceae	OTU1812	0	0	0	0	0	1	1	0	0	0	0	1	0	2	0	0	0	2	3
d__Bacteria	k__norank_d__Bacteria	p__Firmicutes	c__Clostridia	o__Clostridiales	f__Ruminococcaceae	g__Ruminococcaceae_UCG-010	s__uncultured_bacterium_g__Ruminococcaceae_UCG-010	OTU1813	0	0	0	0	0	0	0	0	0	0	0	0	3	0	2	1	3	4	1
d__Bacteria	k__norank_d__Bacteria	p__Firmicutes	c__Clostridia	o__Clostridiales	f__Ruminococcaceae	g__Ruminococcus_1	s__Ruminococcus_bicirculans	OTU1814	0	0	0	0	0	0	0	0	0	0	0	0	16	1	61	9	1	17	5
d__Bacteria	k__norank_d__Bacteria	p__Bacteroidetes	c__Bacteroidia	o__Bacteroidales	f__Bacteroidaceae	g__Bacteroides	s__Bacteroides_coprophilus	OTU1815	0	0	0	0	0	0	0	0	0	0	0	0	1	0	2	2	0	10	0
d__Bacteria	k__norank_d__Bacteria	p__Firmicutes	c__Clostridia	o__Clostridiales	f__Ruminococcaceae	g__Ruminococcaceae_UCG-010	s__unclassified_g__Ruminococcaceae_UCG-010	OTU1816	0	0	0	0	0	0	0	0	0	0	0	0	0	8	2	0	11	1	0
d__Bacteria	k__norank_d__Bacteria	p__Firmicutes	c__Clostridia	o__Clostridiales	f__Lachnospiraceae	g__Ruminococcus]_gauvreauii_group	s__uncultured_rumen_bacterium_g__Ruminococcus]_gauvreauii_group	OTU1817	0	0	0	0	0	0	0	0	0	0	0	0	0	0	0	0	0	8	0
d__Bacteria	k__norank_d__Bacteria	p__Firmicutes	c__Clostridia	o__Clostridiales	f__Ruminococcaceae	g__Ruminococcaceae_UCG-014	s__unclassified_g__Ruminococcaceae_UCG-014	OTU1818	0	0	0	0	0	1	0	0	0	0	0	0	30	4	42	15	7	18	8
d__Bacteria	k__norank_d__Bacteria	p__Proteobacteria	c__Gammaproteobacteria	o__Betaproteobacteriales	f__Burkholderiaceae	g__Sutterella	s__unclassified_g__Sutterella	OTU1819	0	0	0	0	0	0	0	0	0	0	0	0	0	0	0	0	1	3	0
d__Bacteria	k__norank_d__Bacteria	p__Firmicutes	c__Clostridia	o__Clostridiales	f__Lachnospiraceae	g__Lachnospiraceae_NK4A136_group	s__unclassified_g__Lachnospiraceae_NK4A136_group	OTU182	3	0	0	0	0	0	0	0	0	0	0	0	0	0	0	0	0	0	0
d__Bacteria	k__norank_d__Bacteria	p__Bacteroidetes	c__Bacteroidia	o__Bacteroidales	f__Rikenellaceae	g__Rikenellaceae_RC9_gut_group	s__uncultured_bacterium_g__Rikenellaceae_RC9_gut_group	OTU1820	0	0	0	0	0	0	0	0	0	0	0	0	55	59	28	17	19	38	20
d__Bacteria	k__norank_d__Bacteria	p__Firmicutes	c__Clostridia	o__Clostridiales	f__Ruminococcaceae	g__unclassified_f__Ruminococcaceae	s__unclassified_f__Ruminococcaceae	OTU1821	0	0	0	0	0	0	0	0	0	0	0	0	0	0	0	0	0	2	0
d__Bacteria	k__norank_d__Bacteria	p__Bacteroidetes	c__Bacteroidia	o__Bacteroidales	f__Muribaculaceae	g__norank_f__Muribaculaceae	s__unclassified_g__norank_f__Muribaculaceae	OTU1822	0	0	0	0	0	0	0	0	0	0	0	0	0	13	0	0	0	0	0
d__Bacteria	k__norank_d__Bacteria	p__Firmicutes	c__Bacilli	o__Lactobacillales	f__Streptococcaceae	g__Streptococcus	s__unclassified_g__Streptococcus	OTU1823	1	0	0	1	0	0	0	0	0	1	0	0	643	768	915	581	566	2041	120
d__Bacteria	k__norank_d__Bacteria	p__Firmicutes	c__Clostridia	o__Clostridiales	f__Ruminococcaceae	g__Ruminococcaceae_UCG-013	s__uncultured_bacterium_g__Ruminococcaceae_UCG-013	OTU1824	0	0	0	0	0	0	0	0	0	0	0	0	2	3	4	0	2	1	0
d__Bacteria	k__norank_d__Bacteria	p__Tenericutes	c__Mollicutes	o__Mycoplasmatales	f__Mycoplasmataceae	g__Mycoplasma	s__Mycoplasma_sualvi	OTU1825	0	0	0	0	0	0	0	0	0	0	0	0	0	1	0	0	0	2	0
d__Bacteria	k__norank_d__Bacteria	p__Firmicutes	c__Erysipelotrichia	o__Erysipelotrichales	f__Erysipelotrichaceae	g__Holdemanella	s__uncultured_bacterium_g__Holdemanella	OTU1826	0	0	0	0	0	0	0	0	0	0	1	0	116	147	32	55	13	116	50
d__Bacteria	k__norank_d__Bacteria	p__Firmicutes	c__Clostridia	o__Clostridiales	f__Ruminococcaceae	g__Candidatus_Soleaferrea	s__uncultured_bacterium_g__Candidatus_Soleaferrea	OTU1827	0	0	0	0	0	0	0	0	0	0	0	0	0	0	0	0	0	2	0
d__Bacteria	k__norank_d__Bacteria	p__Bacteroidetes	c__Bacteroidia	o__Bacteroidales	f__Rikenellaceae	g__Rikenellaceae_RC9_gut_group	s__wallaby_gut_metagenome_g__Rikenellaceae_RC9_gut_group	OTU1828	0	0	0	0	0	0	0	0	0	0	0	0	0	15	0	0	5	1	1
d__Bacteria	k__norank_d__Bacteria	p__Firmicutes	c__Clostridia	o__Clostridiales	f__Clostridiales_vadinBB60_group	g__norank_f__Clostridiales_vadinBB60_group	s__uncultured_bacterium_g__norank_f__Clostridiales_vadinBB60_group	OTU1829	0	0	0	0	0	0	0	0	0	0	0	0	0	0	0	0	0	1	0
d__Bacteria	k__norank_d__Bacteria	p__Actinobacteria	c__Actinobacteria	o__unclassified_c__Actinobacteria	f__unclassified_c__Actinobacteria	g__unclassified_c__Actinobacteria	s__unclassified_c__Actinobacteria	OTU183	3	0	0	0	0	0	0	0	0	0	0	0	0	0	0	0	0	0	0
d__Bacteria	k__norank_d__Bacteria	p__Firmicutes	c__Negativicutes	o__Selenomonadales	f__Veillonellaceae	g__Megamonas	s__uncultured_bacterium_g__Megamonas	OTU1830	0	0	0	0	0	0	0	0	0	0	0	2	592	60	1267	1510	62	1810	30
d__Bacteria	k__norank_d__Bacteria	p__Firmicutes	c__Clostridia	o__Clostridiales	f__Ruminococcaceae	g__Ruminococcaceae_UCG-010	s__unclassified_g__Ruminococcaceae_UCG-010	OTU1831	0	0	0	0	0	0	0	0	0	0	0	0	6	2	2	23	7	10	6
d__Bacteria	k__norank_d__Bacteria	p__Tenericutes	c__Mollicutes	o__Anaeroplasmatales	f__Anaeroplasmataceae	g__Anaeroplasma	s__uncultured_bacterium_g__Anaeroplasma	OTU1832	0	0	0	0	0	0	0	0	0	0	0	0	0	1	0	0	0	1	0
d__Bacteria	k__norank_d__Bacteria	p__Firmicutes	c__Clostridia	o__Clostridiales	f__Ruminococcaceae	g__Ruminococcus_2	s__uncultured_bacterium_g__Ruminococcus_2	OTU1833	0	0	0	0	0	0	0	0	0	0	0	0	0	0	1	0	0	9	0
d__Bacteria	k__norank_d__Bacteria	p__Firmicutes	c__Negativicutes	o__Selenomonadales	f__Veillonellaceae	g__Mitsuokella	s__Mitsuokella_jalaludinii	OTU1834	0	0	0	0	0	0	0	0	0	0	0	0	295	111	69	158	38	238	78
d__Bacteria	k__norank_d__Bacteria	p__Firmicutes	c__Erysipelotrichia	o__Erysipelotrichales	f__Erysipelotrichaceae	g__Catenisphaera	s__uncultured_bacterium_g__Catenisphaera	OTU1835	0	0	0	0	0	0	0	0	0	0	0	0	27	2	1	2	0	14	1
d__Bacteria	k__norank_d__Bacteria	p__Firmicutes	c__Clostridia	o__Clostridiales	f__Ruminococcaceae	g__Ruminococcaceae_UCG-010	s__uncultured_bacterium_g__Ruminococcaceae_UCG-010	OTU1836	0	0	0	0	0	0	0	0	0	0	0	0	0	10	0	1	7	3	0
d__Bacteria	k__norank_d__Bacteria	p__Firmicutes	c__Clostridia	o__Clostridiales	f__Ruminococcaceae	g__Ruminococcaceae_UCG-010	s__uncultured_bacterium_g__Ruminococcaceae_UCG-010	OTU1837	0	0	0	0	0	0	0	0	0	0	0	0	3	0	0	2	2	1	4
d__Bacteria	k__norank_d__Bacteria	p__Firmicutes	c__Clostridia	o__Clostridiales	f__Clostridiales_vadinBB60_group	g__norank_f__Clostridiales_vadinBB60_group	s__unclassified_g__norank_f__Clostridiales_vadinBB60_group	OTU1838	2	0	0	0	0	0	0	0	0	0	0	0	0	0	0	1	0	1	2
d__Bacteria	k__norank_d__Bacteria	p__Firmicutes	c__Clostridia	o__Clostridiales	f__Ruminococcaceae	g__unclassified_f__Ruminococcaceae	s__unclassified_f__Ruminococcaceae	OTU1839	6	0	0	2	0	1	0	0	0	0	2	0	6	10	13	10	4	18	3
d__Bacteria	k__norank_d__Bacteria	p__Firmicutes	c__Clostridia	o__Clostridiales	f__Ruminococcaceae	g__Ruminococcaceae_UCG-014	s__unclassified_g__Ruminococcaceae_UCG-014	OTU184	10	0	0	0	0	0	0	0	0	0	0	0	0	0	0	0	8	0	0
d__Bacteria	k__norank_d__Bacteria	p__Bacteroidetes	c__Bacteroidia	o__Bacteroidales	f__Muribaculaceae	g__norank_f__Muribaculaceae	s__uncultured_organism_g__norank_f__Muribaculaceae	OTU1840	0	0	1	0	0	0	0	0	2	0	0	0	3	14	28	41	7	11	22
d__Bacteria	k__norank_d__Bacteria	p__Bacteroidetes	c__Bacteroidia	o__Bacteroidales	f__Muribaculaceae	g__norank_f__Muribaculaceae	s__uncultured_rumen_bacterium_g__norank_f__Muribaculaceae	OTU1841	0	0	0	0	0	0	0	0	0	0	0	0	1	0	2	16	0	4	1
d__Bacteria	k__norank_d__Bacteria	p__Bacteroidetes	c__Bacteroidia	o__Bacteroidales	f__Prevotellaceae	g__Prevotella_1	s__uncultured_bacterium_g__Prevotella_1	OTU1842	0	0	0	0	0	0	0	0	0	0	0	0	0	21	6	1	5	4	7
d__Bacteria	k__norank_d__Bacteria	p__Bacteroidetes	c__Bacteroidia	o__Bacteroidales	f__Bacteroidales_RF16_group	g__norank_f__Bacteroidales_RF16_group	s__uncultured_bacterium_g__norank_f__Bacteroidales_RF16_group	OTU1843	0	0	0	0	0	0	0	0	0	0	0	0	0	3	1	0	14	8	7
d__Bacteria	k__norank_d__Bacteria	p__Firmicutes	c__Clostridia	o__Clostridiales	f__Ruminococcaceae	g__Eubacterium]_coprostanoligenes_group	s__unclassified_g__Eubacterium]_coprostanoligenes_group	OTU1844	0	0	0	0	0	0	0	0	0	0	0	0	48	7	5	15	11	5	7
d__Bacteria	k__norank_d__Bacteria	p__Bacteroidetes	c__Bacteroidia	o__Bacteroidales	f__Muribaculaceae	g__norank_f__Muribaculaceae	s__uncultured_bacterium_g__norank_f__Muribaculaceae	OTU1845	0	0	0	0	0	0	0	0	0	0	0	0	0	0	1	3	1	38	1
d__Bacteria	k__norank_d__Bacteria	p__Bacteroidetes	c__Bacteroidia	o__Bacteroidales	f__Prevotellaceae	g__norank_f__Prevotellaceae	s__uncultured_bacterium_g__norank_f__Prevotellaceae	OTU1846	0	0	0	0	0	0	0	0	0	0	0	0	80	9	62	61	0	46	74
d__Bacteria	k__norank_d__Bacteria	p__Bacteroidetes	c__Bacteroidia	o__Bacteroidales	f__Bacteroidaceae	g__Bacteroides	s__uncultured_bacterium_g__Bacteroides	OTU1847	5	8	2	2	15	7	4	4	2	3	6	3	0	1	0	5	0	3	0
d__Bacteria	k__norank_d__Bacteria	p__Firmicutes	c__Clostridia	o__Clostridiales	f__Ruminococcaceae	g__Ruminococcaceae_UCG-005	s__uncultured_organism_g__Ruminococcaceae_UCG-005	OTU1848	0	0	0	0	0	0	0	0	0	0	0	0	55	156	60	113	96	80	22
d__Bacteria	k__norank_d__Bacteria	p__Firmicutes	c__Clostridia	o__Clostridiales	f__Ruminococcaceae	g__GCA-900066225	s__unclassified_g__GCA-900066225	OTU1849	0	0	0	0	0	0	0	0	0	0	0	0	0	0	0	0	1	1	0
d__Bacteria	k__norank_d__Bacteria	p__Firmicutes	c__Clostridia	o__Clostridiales	f__Heliobacteriaceae	g__Hydrogenispora	s__unclassified_g__Hydrogenispora	OTU185	2	0	0	0	0	0	0	0	0	0	0	0	0	0	0	0	0	0	0
d__Bacteria	k__norank_d__Bacteria	p__Firmicutes	c__Erysipelotrichia	o__Erysipelotrichales	f__Erysipelotrichaceae	g__Erysipelotrichaceae_UCG-004	s__unclassified_g__Erysipelotrichaceae_UCG-004	OTU1850	0	0	0	0	0	0	0	0	0	0	0	0	0	2	1	2	1	3	0
d__Bacteria	k__norank_d__Bacteria	p__Firmicutes	c__Clostridia	o__Clostridiales	f__Ruminococcaceae	g__Ruminococcaceae_UCG-003	s__unclassified_g__Ruminococcaceae_UCG-003	OTU1851	0	0	0	0	0	0	0	0	0	0	0	0	18	14	0	1	5	5	0
d__Bacteria	k__norank_d__Bacteria	p__Proteobacteria	c__Gammaproteobacteria	o__Aeromonadales	f__Succinivibrionaceae	g__Succinivibrio	s__unclassified_g__Succinivibrio	OTU1852	0	0	0	0	0	0	0	0	0	0	0	0	0	3	456	37	241	4098	361
d__Bacteria	k__norank_d__Bacteria	p__Firmicutes	c__Clostridia	o__Clostridiales	f__Ruminococcaceae	g__Ruminococcaceae_UCG-009	s__uncultured_bacterium_g__Ruminococcaceae_UCG-009	OTU1853	0	0	0	0	0	0	0	0	0	0	0	0	0	2	0	0	0	1	0
d__Bacteria	k__norank_d__Bacteria	p__Firmicutes	c__Clostridia	o__Clostridiales	f__Family_XIII	g__Family_XIII_AD3011_group	s__unclassified_g__Family_XIII_AD3011_group	OTU1854	0	0	0	0	0	0	0	0	0	0	0	0	2	94	25	36	36	20	19
d__Bacteria	k__norank_d__Bacteria	p__Firmicutes	c__Clostridia	o__Clostridiales	f__Ruminococcaceae	g__Ruminococcaceae_UCG-002	s__uncultured_rumen_bacterium_g__Ruminococcaceae_UCG-002	OTU1855	0	0	0	0	0	0	0	0	0	0	0	0	30	74	27	116	27	65	16
d__Bacteria	k__norank_d__Bacteria	p__Firmicutes	c__Clostridia	o__Clostridiales	f__Ruminococcaceae	g__GCA-900066225	s__uncultured_bacterium_g__GCA-900066225	OTU1856	0	0	0	0	0	0	0	0	0	0	0	0	1	15	2	4	5	7	0
d__Bacteria	k__norank_d__Bacteria	p__Firmicutes	c__Clostridia	o__Clostridiales	f__Ruminococcaceae	g__Ruminococcaceae_UCG-014	s__unclassified_g__Ruminococcaceae_UCG-014	OTU1857	4	0	0	0	0	0	0	0	0	0	0	0	0	10	0	1	47	2	0
d__Bacteria	k__norank_d__Bacteria	p__Firmicutes	c__Erysipelotrichia	o__Erysipelotrichales	f__Erysipelotrichaceae	g__Erysipelotrichaceae_UCG-004	s__uncultured_bacterium_g__Erysipelotrichaceae_UCG-004	OTU1858	0	0	0	0	0	0	0	0	0	0	0	0	0	0	0	0	0	1	0
d__Bacteria	k__norank_d__Bacteria	p__Firmicutes	c__Clostridia	o__Clostridiales	f__Ruminococcaceae	g__Eubacterium]_coprostanoligenes_group	s__uncultured_organism_g__Eubacterium]_coprostanoligenes_group	OTU1859	0	0	0	0	0	0	0	0	0	0	0	0	2	237	15	70	11	193	2
d__Bacteria	k__norank_d__Bacteria	p__Bacteroidetes	c__Bacteroidia	o__Bacteroidales	f__Muribaculaceae	g__norank_f__Muribaculaceae	s__uncultured_bacterium_g__norank_f__Muribaculaceae	OTU186	2	0	0	0	0	0	0	0	0	0	0	0	0	0	0	0	0	0	0
d__Bacteria	k__norank_d__Bacteria	p__Firmicutes	c__Erysipelotrichia	o__Erysipelotrichales	f__Erysipelotrichaceae	g__norank_f__Erysipelotrichaceae	s__uncultured_Erysipelotrichaceae_bacterium_g__norank	OTU1860	0	0	0	0	0	0	0	0	0	0	0	0	0	2	0	0	0	1	1
d__Bacteria	k__norank_d__Bacteria	p__Firmicutes	c__Clostridia	o__Clostridiales	f__Ruminococcaceae	g__Oscillospira	s__unclassified_g__Oscillospira	OTU1861	8	1	1	0	0	1	0	0	1	0	1	3	8	103	65	28	18	38	14
d__Bacteria	k__norank_d__Bacteria	p__Firmicutes	c__Negativicutes	o__Selenomonadales	f__Veillonellaceae	g__unclassified_f__Veillonellaceae	s__unclassified_f__Veillonellaceae	OTU1862	0	0	0	0	0	0	0	0	0	0	0	0	0	0	76	8	3	48	3
d__Bacteria	k__norank_d__Bacteria	p__Epsilonbacteraeota	c__Campylobacteria	o__Campylobacterales	f__Campylobacteraceae	g__Campylobacter	s__Campylobacter_fetus_subsp._fetus	OTU1864	0	0	0	0	0	0	0	0	0	0	0	0	3	21	119	5	33	100	400
d__Bacteria	k__norank_d__Bacteria	p__Firmicutes	c__Bacilli	o__Lactobacillales	f__Lactobacillaceae	g__Lactobacillus	s__unclassified_g__Lactobacillus	OTU1865	0	0	0	0	0	0	0	0	0	0	0	0	0	0	2	15	20	1	56
d__Bacteria	k__norank_d__Bacteria	p__Bacteroidetes	c__Bacteroidia	o__Bacteroidales	f__Prevotellaceae	g__norank_f__Prevotellaceae	s__uncultured_bacterium_g__norank_f__Prevotellaceae	OTU1866	0	0	0	0	0	0	0	0	0	0	0	0	55	6	50	95	67	23	46
d__Bacteria	k__norank_d__Bacteria	p__Bacteroidetes	c__Bacteroidia	o__Bacteroidales	f__Prevotellaceae	g__Prevotella_1	s__uncultured_bacterium_g__Prevotella_1	OTU1867	0	0	0	0	0	0	0	0	0	0	0	0	15	169	70	62	21	29	365
d__Bacteria	k__norank_d__Bacteria	p__Bacteroidetes	c__Bacteroidia	o__Bacteroidales	f__Rikenellaceae	g__Rikenellaceae_RC9_gut_group	s__uncultured_bacterium_g__Rikenellaceae_RC9_gut_group	OTU1868	0	0	0	0	0	0	0	0	0	0	0	0	3	4	2	4	6	5	21
d__Bacteria	k__norank_d__Bacteria	p__Actinobacteria	c__Actinobacteria	o__Coriobacteriales	f__Atopobiaceae	g__Olsenella	s__unclassified_g__Olsenella	OTU1869	0	1	0	0	0	0	0	0	0	0	0	0	198	17	53	86	19	21	138
d__Bacteria	k__norank_d__Bacteria	p__Proteobacteria	c__Gammaproteobacteria	o__CCD24	f__norank_o__CCD24	g__norank_o__CCD24	s__uncultured_bacterium_g__norank_o__CCD24	OTU187	2	0	0	0	0	0	0	0	0	0	0	0	0	0	0	0	0	0	0
d__Bacteria	k__norank_d__Bacteria	p__Actinobacteria	c__Actinobacteria	o__Coriobacteriales	f__norank_o__Coriobacteriales	g__norank_o__Coriobacteriales	s__uncultured_bacterium_g__norank_o__Coriobacteriales	OTU1870	0	0	0	0	0	0	0	0	0	0	0	0	0	14	3	2	18	0	15
d__Bacteria	k__norank_d__Bacteria	p__Bacteroidetes	c__Bacteroidia	o__Bacteroidales	f__Prevotellaceae	g__Prevotella_2	s__unclassified_g__Prevotella_2	OTU1871	0	0	0	0	0	0	0	0	0	0	0	0	23	80	355	66	177	173	484
d__Bacteria	k__norank_d__Bacteria	p__Bacteroidetes	c__Bacteroidia	o__Bacteroidales	f__Prevotellaceae	g__unclassified_f__Prevotellaceae	s__unclassified_f__Prevotellaceae	OTU1872	0	0	0	0	0	0	0	0	0	0	0	0	5	16	3	3	16	5	9
d__Bacteria	k__norank_d__Bacteria	p__Tenericutes	c__Mollicutes	o__Mollicutes_RF39	f__norank_o__Mollicutes_RF39	g__norank_o__Mollicutes_RF39	s__uncultured_bacterium_g__norank_o__Mollicutes_RF39	OTU1873	0	0	0	0	0	0	0	0	0	0	0	0	0	0	0	0	0	0	3
d__Bacteria	k__norank_d__Bacteria	p__Firmicutes	c__Clostridia	o__Clostridiales	f__Peptostreptococcaceae	g__Intestinibacter	s__uncultured_bacterium_g__Intestinibacter	OTU1874	0	0	0	0	0	0	0	0	0	0	2	0	47	105	30	30	24	30	118
d__Bacteria	k__norank_d__Bacteria	p__Firmicutes	c__Clostridia	o__Clostridiales	f__Lachnospiraceae	g__Roseburia	s__uncultured_organism_g__Roseburia	OTU1875	0	1	3	0	3	0	0	1	1	0	0	1	61	118	289	28	45	31	105
d__Bacteria	k__norank_d__Bacteria	p__Firmicutes	c__Clostridia	o__Clostridiales	f__Ruminococcaceae	g__Faecalibacterium	s__metagenome_g__Faecalibacterium	OTU1876	2	0	0	0	14	1	0	0	0	0	1	0	983	609	552	646	128	597	729
d__Bacteria	k__norank_d__Bacteria	p__Cyanobacteria	c__Melainabacteria	o__Gastranaerophilales	f__norank_o__Gastranaerophilales	g__norank_o__Gastranaerophilales	s__uncultured_bacterium_g__norank_o__Gastranaerophilales	OTU1877	0	0	0	0	0	0	0	0	0	0	0	0	3	1	10	2	23	1	13
d__Bacteria	k__norank_d__Bacteria	p__Firmicutes	c__Bacilli	o__Lactobacillales	f__Lactobacillaceae	g__Lactobacillus	s__Lactobacillus_agilis	OTU1878	0	0	0	0	0	0	0	0	0	0	0	0	0	0	0	0	0	0	5
d__Bacteria	k__norank_d__Bacteria	p__Deferribacteres	c__Deferribacteres	o__Deferribacterales	f__Deferribacteraceae	g__Mucispirillum	s__uncultured_bacterium_g__Mucispirillum	OTU1879	0	0	0	0	0	0	0	0	0	0	0	0	0	0	1	0	0	0	4
d__Bacteria	k__norank_d__Bacteria	p__Proteobacteria	c__Gammaproteobacteria	o__Betaproteobacteriales	f__Rhodocyclaceae	g__norank_f__Rhodocyclaceae	s__Thauera_sp._g__norank	OTU188	6	0	0	0	0	0	0	0	0	0	0	32	0	0	0	0	0	0	0
d__Bacteria	k__norank_d__Bacteria	p__Tenericutes	c__Mollicutes	o__Mollicutes_RF39	f__norank_o__Mollicutes_RF39	g__norank_o__Mollicutes_RF39	s__uncultured_bacterium_g__norank_o__Mollicutes_RF39	OTU1880	0	0	0	0	0	0	0	0	0	0	0	0	0	0	0	0	0	0	2
d__Bacteria	k__norank_d__Bacteria	p__Firmicutes	c__Clostridia	o__Clostridiales	f__Lachnospiraceae	g__Blautia	s__unclassified_g__Blautia	OTU1881	3	0	0	0	0	0	0	0	0	2	0	0	0	0	0	0	0	0	0
d__Bacteria	k__norank_d__Bacteria	p__Firmicutes	c__Clostridia	o__Clostridiales	f__Lachnospiraceae	g__Lachnospiraceae_UCG-010	s__uncultured_bacterium_g__Lachnospiraceae_UCG-010	OTU1882	0	0	0	0	0	0	0	0	0	0	0	0	0	0	0	0	2	0	1
d__Bacteria	k__norank_d__Bacteria	p__Bacteroidetes	c__Bacteroidia	o__Bacteroidales	f__Muribaculaceae	g__norank_f__Muribaculaceae	s__unclassified_g__norank_f__Muribaculaceae	OTU1883	0	0	0	0	0	0	0	0	0	0	0	0	3	7	3	5	0	26	6
d__Bacteria	k__norank_d__Bacteria	p__Firmicutes	c__Clostridia	o__Clostridiales	f__Clostridiales_vadinBB60_group	g__norank_f__Clostridiales_vadinBB60_group	s__uncultured_bacterium_g__norank_f__Clostridiales_vadinBB60_group	OTU1884	0	0	0	0	0	0	0	0	0	0	0	0	0	0	0	0	0	0	1
d__Bacteria	k__norank_d__Bacteria	p__Bacteroidetes	c__Bacteroidia	o__Bacteroidales	f__Prevotellaceae	g__Prevotellaceae_UCG-001	s__uncultured_bacterium_g__Prevotellaceae_UCG-001	OTU1885	0	0	0	0	0	0	0	0	0	0	0	0	0	4	11	8	41	4	20
d__Bacteria	k__norank_d__Bacteria	p__Bacteroidetes	c__Bacteroidia	o__Bacteroidales	f__Muribaculaceae	g__norank_f__Muribaculaceae	s__uncultured_bacterium_g__norank_f__Muribaculaceae	OTU1886	8	2	2	4	12	2	1	1	1	0	0	2	0	3	0	1	0	2	1
d__Bacteria	k__norank_d__Bacteria	p__Bacteroidetes	c__Bacteroidia	o__Bacteroidales	f__Muribaculaceae	g__norank_f__Muribaculaceae	s__uncultured_bacterium_g__norank_f__Muribaculaceae	OTU1887	0	0	0	0	0	0	0	0	0	0	0	0	0	0	5	18	2	20	150
d__Bacteria	k__norank_d__Bacteria	p__Firmicutes	c__Clostridia	o__Clostridiales	f__Clostridiales_vadinBB60_group	g__norank_f__Clostridiales_vadinBB60_group	s__metagenome_g__norank_f__Clostridiales_vadinBB60_group	OTU1888	0	0	0	0	0	0	0	0	0	0	0	0	0	0	0	1	0	0	1
d__Bacteria	k__norank_d__Bacteria	p__Bacteroidetes	c__Bacteroidia	o__Bacteroidales	f__Bacteroidaceae	g__Bacteroides	s__Bacteroides_fragilis_g__Bacteroides	OTU1889	3	0	2	12	8	1	0	0	0	0	0	1	2	2	2	0	0	2	6
d__Bacteria	k__norank_d__Bacteria	p__Firmicutes	c__Clostridia	o__Clostridiales	f__Ruminococcaceae	g__unclassified_f__Ruminococcaceae	s__unclassified_f__Ruminococcaceae	OTU189	2	0	0	0	0	0	0	0	0	0	0	0	0	0	0	0	0	0	0
d__Bacteria	k__norank_d__Bacteria	p__Bacteroidetes	c__Bacteroidia	o__Bacteroidales	f__Prevotellaceae	g__Prevotella_7	s__unclassified_g__Prevotella_7	OTU1890	0	0	0	0	0	0	0	0	0	0	0	0	185	148	25	633	0	299	325
d__Bacteria	k__norank_d__Bacteria	p__Bacteroidetes	c__Bacteroidia	o__Bacteroidales	f__Muribaculaceae	g__norank_f__Muribaculaceae	s__uncultured_bacterium_g__norank_f__Muribaculaceae	OTU1891	0	0	0	0	0	0	0	0	0	0	0	0	61	3	8	26	4	6	52
d__Bacteria	k__norank_d__Bacteria	p__Tenericutes	c__Mollicutes	o__Mollicutes_RF39	f__norank_o__Mollicutes_RF39	g__norank_o__Mollicutes_RF39	s__metagenome_g__norank_o__Mollicutes_RF39	OTU1892	0	0	0	0	0	0	0	0	0	0	0	0	0	4	1	0	5	0	1
d__Bacteria	k__norank_d__Bacteria	p__Firmicutes	c__Negativicutes	o__Selenomonadales	f__Veillonellaceae	g__norank_f__Veillonellaceae	s__uncultured_rumen_bacterium_g__norank_f__Veillonellaceae	OTU1893	0	0	0	0	0	0	0	0	0	0	0	0	10	2	2	0	0	0	2
d__Bacteria	k__norank_d__Bacteria	p__Bacteroidetes	c__Bacteroidia	o__Bacteroidales	f__Muribaculaceae	g__norank_f__Muribaculaceae	s__uncultured_bacterium_g__norank_f__Muribaculaceae	OTU1894	0	0	0	0	0	0	0	0	0	0	0	0	0	51	20	18	32	23	48
d__Bacteria	k__norank_d__Bacteria	p__Firmicutes	c__Negativicutes	o__Selenomonadales	f__Veillonellaceae	g__Dialister	s__uncultured_bacterium_g__Dialister	OTU1895	0	0	0	0	0	0	0	0	0	0	0	0	3410	91	1305	1658	34	2779	754
d__Bacteria	k__norank_d__Bacteria	p__Firmicutes	c__Clostridia	o__Clostridiales	f__Ruminococcaceae	g__Ruminococcaceae_UCG-010	s__uncultured_bacterium_g__Ruminococcaceae_UCG-010	OTU1896	0	0	0	0	0	0	0	0	0	0	0	0	0	3	1	0	0	0	31
d__Bacteria	k__norank_d__Bacteria	p__Bacteroidetes	c__Bacteroidia	o__Bacteroidales	f__Muribaculaceae	g__norank_f__Muribaculaceae	s__unclassified_g__norank_f__Muribaculaceae	OTU1897	0	0	0	0	0	0	0	0	0	0	0	0	12	37	381	58	16	104	101
d__Bacteria	k__norank_d__Bacteria	p__Firmicutes	c__Clostridia	o__Clostridiales	f__Lachnospiraceae	g__Lachnospiraceae_NK4A136_group	s__unclassified_g__Lachnospiraceae_NK4A136_group	OTU1898	0	0	0	0	3	0	1	0	0	0	0	1	66	130	114	63	22	54	689
d__Bacteria	k__norank_d__Bacteria	p__Bacteroidetes	c__Bacteroidia	o__Bacteroidales	f__Marinifilaceae	g__Butyricimonas	s__Butyricimonas_virosa	OTU1899	4	0	0	1	0	1	0	0	0	0	0	0	0	0	0	0	0	0	1
d__Bacteria	k__norank_d__Bacteria	p__Bacteroidetes	c__Bacteroidia	o__Bacteroidales	f__Prevotellaceae	g__Prevotella_7	s__Prevotella_melaninogenica_ATCC_25845	OTU19	4	0	0	0	0	0	1	0	0	0	0	1	0	0	0	0	0	0	0
d__Bacteria	k__norank_d__Bacteria	p__Firmicutes	c__Clostridia	o__Clostridiales	f__Lachnospiraceae	g__Eubacterium]_xylanophilum_group	s__uncultured_bacterium_g__Eubacterium]_xylanophilum_group	OTU190	8	0	0	0	0	0	0	0	0	0	0	0	0	0	0	0	0	0	0
d__Bacteria	k__norank_d__Bacteria	p__Actinobacteria	c__Actinobacteria	o__Coriobacteriales	f__Coriobacteriaceae	g__Collinsella	s__uncultured_bacterium_g__Collinsella	OTU1900	2	0	0	0	0	0	0	0	0	0	0	0	99	45	18	39	10	15	14
d__Bacteria	k__norank_d__Bacteria	p__Firmicutes	c__Clostridia	o__Clostridiales	f__Ruminococcaceae	g__Ruminococcaceae_UCG-014	s__uncultured_bacterium_g__Ruminococcaceae_UCG-014	OTU1901	0	0	0	0	0	0	0	0	0	0	0	0	37	38	6	10	78	4	12
d__Bacteria	k__norank_d__Bacteria	p__Firmicutes	c__Clostridia	o__Clostridiales	f__Ruminococcaceae	g__Ruminococcaceae_UCG-005	s__unclassified_g__Ruminococcaceae_UCG-005	OTU1902	0	0	0	1	0	0	0	0	0	0	0	0	5	410	131	9	317	29	41
d__Bacteria	k__norank_d__Bacteria	p__Bacteroidetes	c__Bacteroidia	o__Bacteroidales	f__Prevotellaceae	g__Alloprevotella	s__uncultured_Bacteroidales_bacterium_g__Alloprevotella	OTU1903	0	0	0	0	0	0	0	0	0	0	0	0	0	9	4	23	21	1	32
d__Bacteria	k__norank_d__Bacteria	p__Tenericutes	c__Mollicutes	o__Mollicutes_RF39	f__norank_o__Mollicutes_RF39	g__norank_o__Mollicutes_RF39	s__uncultured_bacterium_g__norank_o__Mollicutes_RF39	OTU1904	0	0	0	0	0	0	0	0	0	0	0	0	0	12	3	0	22	0	2
d__Bacteria	k__norank_d__Bacteria	p__Firmicutes	c__Clostridia	o__Clostridiales	f__Ruminococcaceae	g__Ruminococcaceae_NK4A214_group	s__unclassified_g__Ruminococcaceae_NK4A214_group	OTU1905	0	0	0	0	0	0	0	0	0	0	0	0	0	0	0	0	16	0	1
d__Bacteria	k__norank_d__Bacteria	p__Firmicutes	c__Clostridia	o__Clostridiales	f__Ruminococcaceae	g__Ruminococcaceae_UCG-008	s__uncultured_bacterium_g__Ruminococcaceae_UCG-008	OTU1906	0	0	0	0	0	0	0	0	0	0	0	0	3	10	7	10	3	5	3
d__Bacteria	k__norank_d__Bacteria	p__Cyanobacteria	c__Melainabacteria	o__Gastranaerophilales	f__norank_o__Gastranaerophilales	g__norank_o__Gastranaerophilales	s__uncultured_bacterium_g__norank_o__Gastranaerophilales	OTU1907	0	0	0	0	0	0	0	0	0	0	0	3	1	5	12	5	2	1	4
d__Bacteria	k__norank_d__Bacteria	p__Firmicutes	c__Clostridia	o__Clostridiales	f__Lachnospiraceae	g__Coprococcus_1	s__metagenome_g__Coprococcus_1	OTU1908	0	0	0	0	0	0	0	0	0	0	0	0	14	58	3	5	7	15	312
d__Bacteria	k__norank_d__Bacteria	p__Bacteroidetes	c__Bacteroidia	o__Bacteroidales	f__Muribaculaceae	g__norank_f__Muribaculaceae	s__uncultured_bacterium_g__norank_f__Muribaculaceae	OTU1909	0	0	0	0	1	0	0	1	0	0	0	1	0	0	0	1	0	0	1
d__Bacteria	k__norank_d__Bacteria	p__Deinococcus-Thermus	c__Deinococci	o__Deinococcales	f__Trueperaceae	g__Truepera	s__unclassified_g__Truepera	OTU191	2	0	0	0	0	0	0	0	0	0	0	0	0	0	0	0	0	0	0
d__Bacteria	k__norank_d__Bacteria	p__Firmicutes	c__Clostridia	o__Clostridiales	f__Ruminococcaceae	g__Ruminiclostridium_9	s__uncultured_organism_g__Ruminiclostridium_9	OTU1910	0	0	0	0	0	0	0	0	0	0	0	0	0	15	6	13	10	10	10
d__Bacteria	k__norank_d__Bacteria	p__Bacteroidetes	c__Bacteroidia	o__Bacteroidales	f__Prevotellaceae	g__Prevotella_2	s__uncultured_bacterium_g__Prevotella_2	OTU1911	0	0	0	0	0	0	0	0	0	0	0	0	2	2	15	5	0	32	88
d__Bacteria	k__norank_d__Bacteria	p__Firmicutes	c__Clostridia	o__Clostridiales	f__Christensenellaceae	g__norank_f__Christensenellaceae	s__unclassified_g__norank_f__Christensenellaceae	OTU1912	0	0	0	0	0	0	0	0	0	0	0	0	0	0	0	0	0	1	1
d__Bacteria	k__norank_d__Bacteria	p__Actinobacteria	c__Actinobacteria	o__Streptomycetales	f__Streptomycetaceae	g__Kitasatospora	s__unclassified_g__Kitasatospora	OTU1913	16	0	0	0	0	0	0	0	0	0	2	4	0	0	6	1	1	0	0
d__Bacteria	k__norank_d__Bacteria	p__Firmicutes	c__Clostridia	o__Clostridiales	f__Family_XIII	g__unclassified_f__Family_XIII	s__unclassified_f__Family_XIII	OTU1914	0	0	0	0	1	0	0	0	0	0	0	0	0	31	2	0	8	0	1
d__Bacteria	k__norank_d__Bacteria	p__Actinobacteria	c__Actinobacteria	o__Coriobacteriales	f__norank_o__Coriobacteriales	g__norank_o__Coriobacteriales	s__uncultured_bacterium_g__norank_o__Coriobacteriales	OTU1915	0	0	0	0	0	0	0	0	0	0	0	0	4	0	1	1	0	0	1
d__Bacteria	k__norank_d__Bacteria	p__Firmicutes	c__Clostridia	o__Clostridiales	f__Lachnospiraceae	g__Lachnospiraceae_FCS020_group	s__metagenome_g__Lachnospiraceae_FCS020_group	OTU1916	0	0	0	0	0	0	0	0	0	0	0	0	26	81	33	15	20	26	94
d__Bacteria	k__norank_d__Bacteria	p__Bacteroidetes	c__Bacteroidia	o__Bacteroidales	f__Prevotellaceae	g__Prevotella_9	s__unclassified_g__Prevotella_9	OTU1917	0	0	0	0	0	0	0	0	0	0	0	0	2	0	16	13	1	4	22
d__Bacteria	k__norank_d__Bacteria	p__Bacteroidetes	c__Bacteroidia	o__Bacteroidales	f__Prevotellaceae	g__Prevotella_9	s__unclassified_g__Prevotella_9	OTU1918	0	0	0	1	0	3	0	0	0	0	1	11	1030	470	6644	5549	918	5149	6167
d__Bacteria	k__norank_d__Bacteria	p__Firmicutes	c__Clostridia	o__Clostridiales	f__Christensenellaceae	g__Christensenellaceae_R-7_group	s__unclassified_g__Christensenellaceae_R-7_group	OTU1919	0	0	0	0	0	1	0	0	0	0	0	0	0	3	0	1	1	2	1
d__Bacteria	k__norank_d__Bacteria	p__Actinobacteria	c__Actinobacteria	o__Gaiellales	f__norank_o__Gaiellales	g__norank_o__Gaiellales	s__uncultured_bacterium_g__norank_o__Gaiellales	OTU192	1	0	0	0	0	0	0	0	0	0	0	0	0	0	0	0	0	0	0
d__Bacteria	k__norank_d__Bacteria	p__Firmicutes	c__Clostridia	o__Clostridiales	f__Ruminococcaceae	g__Ruminococcaceae_UCG-008	s__uncultured_bacterium_g__Ruminococcaceae_UCG-008	OTU1920	0	0	0	0	0	0	0	0	0	0	0	0	17	205	34	55	153	20	160
d__Bacteria	k__norank_d__Bacteria	p__Firmicutes	c__Clostridia	o__Clostridiales	f__Ruminococcaceae	g__Ruminococcaceae_UCG-014	s__unidentified_rumen_bacterium_JW32	OTU1921	0	0	0	0	0	0	0	0	0	0	0	0	5	2	1	1	92	0	68
d__Bacteria	k__norank_d__Bacteria	p__Firmicutes	c__Clostridia	o__Clostridiales	f__Ruminococcaceae	g__Ruminococcaceae_UCG-013	s__metagenome_g__Ruminococcaceae_UCG-013	OTU1922	0	0	0	0	0	0	0	0	0	0	0	0	1	15	2	0	13	4	2
d__Bacteria	k__norank_d__Bacteria	p__Firmicutes	c__Clostridia	o__Clostridiales	f__Lachnospiraceae	g__unclassified_f__Lachnospiraceae	s__unclassified_f__Lachnospiraceae	OTU1923	0	0	0	0	0	0	0	0	0	0	0	3	88	104	47	1	648	27	34
d__Bacteria	k__norank_d__Bacteria	p__Firmicutes	c__Bacilli	o__Lactobacillales	f__Lactobacillaceae	g__Lactobacillus	s__Lactobacillus_coleohominis	OTU1924	0	0	0	0	0	0	0	0	0	0	0	0	0	0	0	0	0	0	6
d__Bacteria	k__norank_d__Bacteria	p__Firmicutes	c__Clostridia	o__Clostridiales	f__Ruminococcaceae	g__Ruminococcaceae_UCG-013	s__uncultured_bacterium_g__Ruminococcaceae_UCG-013	OTU1925	0	0	0	0	0	0	0	0	0	0	0	0	1	2	0	2	0	0	0
d__Bacteria	k__norank_d__Bacteria	p__Firmicutes	c__Clostridia	o__Clostridiales	f__Ruminococcaceae	g__Ruminococcaceae_NK4A214_group	s__uncultured_bacterium_g__Ruminococcaceae_NK4A214_group	OTU1926	0	0	0	0	0	0	0	0	0	0	0	0	0	16	1	3	2	5	5
d__Bacteria	k__norank_d__Bacteria	p__Firmicutes	c__Clostridia	o__Clostridiales	f__Ruminococcaceae	g__Ruminococcaceae_UCG-002	s__unclassified_g__Ruminococcaceae_UCG-002	OTU1927	0	0	0	0	0	0	0	0	0	0	0	0	0	2	6	15	11	17	6
d__Bacteria	k__norank_d__Bacteria	p__Firmicutes	c__Clostridia	o__Clostridiales	f__Ruminococcaceae	g__Ruminococcaceae_NK4A214_group	s__metagenome_g__Ruminococcaceae_NK4A214_group	OTU1928	0	0	0	0	0	0	0	0	0	0	0	0	46	3	11	17	16	18	13
d__Bacteria	k__norank_d__Bacteria	p__Firmicutes	c__Clostridia	o__Clostridiales	f__Family_XIII	g__Eubacterium]_brachy_group	s__unclassified_g__Eubacterium]_brachy_group	OTU1929	2	0	0	0	0	0	0	0	0	0	0	0	0	0	0	3	2	0	1
d__Bacteria	k__norank_d__Bacteria	p__Armatimonadetes	c__norank_p__Armatimonadetes	o__norank_p__Armatimonadetes	f__norank_p__Armatimonadetes	g__norank_p__Armatimonadetes	s__uncultured_actinobacterium_g__norank_p__Armatimonadetes	OTU193	3	0	0	0	0	0	0	0	0	0	0	0	0	0	0	0	0	0	0
d__Bacteria	k__norank_d__Bacteria	p__Firmicutes	c__Erysipelotrichia	o__Erysipelotrichales	f__Erysipelotrichaceae	g__Solobacterium	s__uncultured_bacterium_g__Solobacterium	OTU1930	0	0	0	0	0	0	0	0	0	0	0	0	98	32	0	21	1	98	45
d__Bacteria	k__norank_d__Bacteria	p__Bacteroidetes	c__Bacteroidia	o__Bacteroidales	f__Prevotellaceae	g__Alloprevotella	s__uncultured_bacterium_g__Alloprevotella	OTU1931	0	0	0	0	0	0	0	0	0	0	0	0	1	7	81	46	27	14	8
d__Bacteria	k__norank_d__Bacteria	p__Bacteroidetes	c__Bacteroidia	o__Bacteroidales	f__Prevotellaceae	g__Prevotellaceae_NK3B31_group	s__uncultured_bacterium_g__Prevotellaceae_NK3B31_group	OTU1932	0	0	0	0	0	0	0	0	0	0	0	0	0	55	524	25	1050	212	786
d__Bacteria	k__norank_d__Bacteria	p__Firmicutes	c__Bacilli	o__Lactobacillales	f__Lactobacillaceae	g__Lactobacillus	s__Lactobacillus_reuteri	OTU1933	14	0	0	0	0	2	0	0	0	0	0	16	20	7	279	429	393	52	546
d__Bacteria	k__norank_d__Bacteria	p__Actinobacteria	c__Actinobacteria	o__Coriobacteriales	f__Eggerthellaceae	g__Slackia	s__Slackia_isoflavoniconvertens	OTU1934	0	0	0	0	0	0	0	0	0	0	0	0	2	2	0	2	1	1	0
d__Bacteria	k__norank_d__Bacteria	p__Firmicutes	c__Clostridia	o__Clostridiales	f__Lachnospiraceae	g__Eubacterium]_eligens_group	s__uncultured_bacterium_g__Eubacterium]_eligens_group	OTU1935	0	0	0	0	0	0	0	0	0	0	0	0	42	111	143	73	52	71	101
d__Bacteria	k__norank_d__Bacteria	p__Chloroflexi	c__Anaerolineae	o__Anaerolineales	f__Anaerolineaceae	g__unclassified_f__Anaerolineaceae	s__unclassified_f__Anaerolineaceae	OTU1936	0	0	1	0	0	0	0	0	0	0	0	0	0	0	0	0	0	0	0
d__Bacteria	k__norank_d__Bacteria	p__Proteobacteria	c__Gammaproteobacteria	o__Pseudomonadales	f__Moraxellaceae	g__Psychrobacter	s__unclassified_g__Psychrobacter	OTU1937	2	1	0	2	1	0	0	0	0	0	0	0	0	0	0	0	0	0	0
d__Bacteria	k__norank_d__Bacteria	p__Cyanobacteria	c__Oxyphotobacteria	o__Chloroplast	f__norank_o__Chloroplast	g__norank_o__Chloroplast	s__Populus_euphratica	OTU1938	15	9	14	0	0	4	10	1	0	0	5	8	0	0	0	0	0	0	0
d__Bacteria	k__norank_d__Bacteria	p__Proteobacteria	c__Alphaproteobacteria	o__Rickettsiales	f__Anaplasmataceae	g__Wolbachia	s__uncultured_bacterium_g__Wolbachia	OTU1939	28653	36377	36152	38834	36680	38725	34876	35161	37302	24060	16	17	0	0	0	0	0	0	0
d__Bacteria	k__norank_d__Bacteria	p__Proteobacteria	c__Gammaproteobacteria	o__Betaproteobacteriales	f__Neisseriaceae	g__Neisseria	s__Neisseria_subflava	OTU194	7	0	0	0	0	1	1	1	0	0	0	0	0	0	0	0	0	0	0
d__Bacteria	k__norank_d__Bacteria	p__Firmicutes	c__Clostridia	o__Clostridiales	f__Lachnospiraceae	g__Lachnospiraceae_NK4A136_group	s__uncultured_bacterium_g__Lachnospiraceae_NK4A136_group	OTU1940	5	0	2	0	0	0	0	0	0	0	0	0	0	0	0	0	0	0	0
d__Bacteria	k__norank_d__Bacteria	p__Verrucomicrobia	c__Verrucomicrobiae	o__Verrucomicrobiales	f__Akkermansiaceae	g__Akkermansia	s__unclassified_g__Akkermansia	OTU1941	50	2	5	1	6	3	2	0	0	1	2	1	1	0	0	0	0	0	0
d__Bacteria	k__norank_d__Bacteria	p__Actinobacteria	c__Actinobacteria	o__Micrococcales	f__Microbacteriaceae	g__Agromyces	s__Agromyces_ulmi	OTU1942	0	0	1	0	0	0	0	0	0	0	1	3	0	0	0	0	0	0	0
d__Bacteria	k__norank_d__Bacteria	p__Proteobacteria	c__Gammaproteobacteria	o__unclassified_c__Gammaproteobacteria	f__unclassified_c__Gammaproteobacteria	g__unclassified_c__Gammaproteobacteria	s__unclassified_c__Gammaproteobacteria	OTU1943	0	0	0	3	0	0	0	0	0	0	0	0	0	0	0	0	0	0	0
d__Bacteria	k__norank_d__Bacteria	p__Proteobacteria	c__Deltaproteobacteria	o__Desulfovibrionales	f__Desulfovibrionaceae	g__Bilophila	s__Bilophila_wadsworthia	OTU1944	0	3	0	2	4	0	0	1	0	1	0	0	0	1	0	0	0	9	4
d__Bacteria	k__norank_d__Bacteria	p__Epsilonbacteraeota	c__Campylobacteria	o__Campylobacterales	f__Campylobacteraceae	g__Campylobacter	s__Campylobacter_ureolyticus	OTU1945	0	0	0	2	0	0	0	0	0	0	0	0	0	0	0	0	0	0	0
d__Bacteria	k__norank_d__Bacteria	p__Acidobacteria	c__Blastocatellia_Subgroup_4	o__11-24	f__norank_o__11-24	g__norank_o__11-24	s__unclassified_g__norank_o__11-24	OTU1946	0	0	0	2	0	0	0	0	0	0	0	0	0	0	0	0	0	0	0
d__Bacteria	k__norank_d__Bacteria	p__Cyanobacteria	c__Oxyphotobacteria	o__Chloroplast	f__norank_o__Chloroplast	g__norank_o__Chloroplast	s__Cunninghamia_lanceolata_var._konishii	OTU1947	7	0	0	8	0	0	0	0	0	0	0	0	0	0	0	0	0	0	0
d__Bacteria	k__norank_d__Bacteria	p__Fusobacteria	c__Fusobacteriia	o__Fusobacteriales	f__Fusobacteriaceae	g__Fusobacterium	s__Fusobacterium_mortiferum	OTU1948	0	0	0	2	0	1	0	0	0	0	6	0	0	0	0	0	0	0	0
d__Bacteria	k__norank_d__Bacteria	p__Bacteroidetes	c__Bacteroidia	o__Bacteroidales	f__Muribaculaceae	g__norank_f__Muribaculaceae	s__unclassified_g__norank_f__Muribaculaceae	OTU1949	0	0	0	2	0	0	0	0	0	0	0	0	0	0	0	0	0	0	0
d__Bacteria	k__norank_d__Bacteria	p__Firmicutes	c__Clostridia	o__Clostridiales	f__Ruminococcaceae	g__UBA1819	s__uncultured_organism_g__UBA1819	OTU195	5	0	0	0	0	0	0	0	0	0	0	0	0	3	1	0	0	0	0
d__Bacteria	k__norank_d__Bacteria	p__Firmicutes	c__Clostridia	o__Clostridiales	f__Ruminococcaceae	g__Ruminiclostridium_9	s__uncultured_bacterium_g__Ruminiclostridium_9	OTU1950	7	0	3	5	0	0	3	1	3	2	0	1	0	1	0	0	0	0	1
d__Bacteria	k__norank_d__Bacteria	p__unclassified_k__norank_d__Bacteria	c__unclassified_k__norank_d__Bacteria	o__unclassified_k__norank_d__Bacteria	f__unclassified_k__norank_d__Bacteria	g__unclassified_k__norank_d__Bacteria	s__unclassified_k__norank_d__Bacteria	OTU1951	0	0	0	3	0	0	0	0	0	0	0	0	0	0	0	0	0	0	0
d__Bacteria	k__norank_d__Bacteria	p__Proteobacteria	c__Gammaproteobacteria	o__Orbales	f__Orbaceae	g__Gilliamella	s__uncultured_gamma_proteobacterium_g__Gilliamella	OTU1952	0	0	0	1	0	0	0	0	0	0	0	0	0	0	0	0	0	0	0
d__Bacteria	k__norank_d__Bacteria	p__Bacteroidetes	c__Bacteroidia	o__Bacteroidales	f__Muribaculaceae	g__norank_f__Muribaculaceae	s__uncultured_bacterium_g__norank_f__Muribaculaceae	OTU1953	36	1	0	7	0	0	0	0	0	0	2	3	0	0	0	0	0	0	0
d__Bacteria	k__norank_d__Bacteria	p__Firmicutes	c__Bacilli	o__Bacillales	f__Bacillaceae	g__Bacillus	s__unclassified_g__Bacillus	OTU1954	0	0	0	1	0	0	0	0	0	0	0	5	0	0	0	0	0	0	0
d__Bacteria	k__norank_d__Bacteria	p__Proteobacteria	c__Alphaproteobacteria	o__Tistrellales	f__Geminicoccaceae	g__norank_f__Geminicoccaceae	s__uncultured_bacterium_g__norank_f__Geminicoccaceae	OTU1955	3	0	0	3	0	0	0	0	0	0	0	0	0	0	0	0	0	0	0
d__Bacteria	k__norank_d__Bacteria	p__Actinobacteria	c__Actinobacteria	o__Micrococcales	f__Micrococcaceae	g__Arthrobacter	s__unclassified_g__Arthrobacter	OTU1956	21	2	0	3	0	2	0	1	0	0	2	8	0	0	0	0	0	0	0
d__Bacteria	k__norank_d__Bacteria	p__Actinobacteria	c__Actinobacteria	o__Micromonosporales	f__Micromonosporaceae	g__norank_f__Micromonosporaceae	s__unclassified_g__norank_f__Micromonosporaceae	OTU1957	0	0	0	1	0	0	0	0	0	0	0	0	0	0	0	0	0	0	0
d__Bacteria	k__norank_d__Bacteria	p__Firmicutes	c__Clostridia	o__Clostridiales	f__Lachnospiraceae	g__Lachnospiraceae_UCG-001	s__uncultured_bacterium_g__Lachnospiraceae_UCG-001	OTU1959	0	0	0	2	0	0	0	0	0	0	0	0	0	0	0	0	0	0	0
d__Bacteria	k__norank_d__Bacteria	p__Proteobacteria	c__Alphaproteobacteria	o__Rhodobacterales	f__Rhodobacteraceae	g__unclassified_f__Rhodobacteraceae	s__unclassified_f__Rhodobacteraceae	OTU196	2	0	0	0	0	0	0	0	0	0	0	0	0	0	0	0	0	0	0
d__Bacteria	k__norank_d__Bacteria	p__Proteobacteria	c__Alphaproteobacteria	o__Rhizobiales	f__Rhizobiaceae	g__unclassified_f__Rhizobiaceae	s__unclassified_f__Rhizobiaceae	OTU1960	0	0	0	2	0	0	0	0	0	0	0	0	0	0	0	0	0	0	0
d__Bacteria	k__norank_d__Bacteria	p__Actinobacteria	c__Actinobacteria	o__Coriobacteriales	f__Atopobiaceae	g__Olsenella	s__Olsenella_profusa	OTU1961	0	0	0	2	0	0	0	0	0	0	0	0	0	0	0	0	0	0	0
d__Bacteria	k__norank_d__Bacteria	p__Firmicutes	c__Clostridia	o__Clostridiales	f__Lachnospiraceae	g__Lachnospiraceae_UCG-001	s__unclassified_g__Lachnospiraceae_UCG-001	OTU1962	8	0	0	2	0	0	0	0	0	0	1	0	0	0	0	0	0	0	0
d__Bacteria	k__norank_d__Bacteria	p__Firmicutes	c__Clostridia	o__Clostridiales	f__unclassified_o__Clostridiales	g__unclassified_o__Clostridiales	s__unclassified_o__Clostridiales	OTU1963	0	0	0	1	0	0	0	0	0	0	0	0	0	0	0	0	0	0	0
d__Bacteria	k__norank_d__Bacteria	p__Firmicutes	c__Clostridia	o__Clostridiales	f__Lachnospiraceae	g__unclassified_f__Lachnospiraceae	s__unclassified_f__Lachnospiraceae	OTU1964	10	0	0	2	0	0	0	0	0	0	2	0	0	0	0	0	0	0	0
d__Bacteria	k__norank_d__Bacteria	p__Proteobacteria	c__Alphaproteobacteria	o__Rickettsiales	f__Mitochondria	g__norank_f__Mitochondria	s__unclassified_g__norank_f__Mitochondria	OTU1965	0	0	0	2	0	0	0	0	0	0	0	0	0	0	0	0	0	0	0
d__Bacteria	k__norank_d__Bacteria	p__Chloroflexi	c__Ktedonobacteria	o__Ktedonobacterales	f__Ktedonobacteraceae	g__Thermosporothrix	s__uncultured_bacterium_g__Thermosporothrix	OTU1966	0	0	0	3	0	0	0	0	0	0	0	0	0	0	0	0	0	0	0
d__Bacteria	k__norank_d__Bacteria	p__Patescibacteria	c__Saccharimonadia	o__Saccharimonadales	f__Saccharimonadaceae	g__norank_f__Saccharimonadaceae	s__uncultured_bacterium_g__norank_f__Saccharimonadaceae	OTU1967	0	0	0	2	0	0	0	0	0	0	0	0	0	0	0	0	0	0	0
d__Bacteria	k__norank_d__Bacteria	p__Proteobacteria	c__Alphaproteobacteria	o__Caulobacterales	f__Caulobacteraceae	g__Phenylobacterium	s__metagenome_g__Phenylobacterium	OTU1968	0	0	0	1	0	0	0	0	0	0	0	0	0	0	0	0	0	0	0
d__Bacteria	k__norank_d__Bacteria	p__Proteobacteria	c__Alphaproteobacteria	o__Rickettsiales	f__Mitochondria	g__norank_f__Mitochondria	s__unclassified_g__norank_f__Mitochondria	OTU1969	0	1	1	0	1	0	0	1	1	0	3	5	0	0	0	0	0	0	0
d__Bacteria	k__norank_d__Bacteria	p__Bacteroidetes	c__Bacteroidia	o__Bacteroidales	f__Muribaculaceae	g__norank_f__Muribaculaceae	s__uncultured_Bacteroidales_bacterium_g__norank_f__Muribaculaceae	OTU1970	68	2	2	5	2	1	0	0	0	0	7	5	0	0	0	0	0	0	2
d__Bacteria	k__norank_d__Bacteria	p__Proteobacteria	c__Alphaproteobacteria	o__Rhodospirillales	f__norank_o__Rhodospirillales	g__norank_o__Rhodospirillales	s__gut_metagenome_g__norank_o__Rhodospirillales	OTU1971	0	0	0	3	0	0	0	0	0	0	0	0	0	0	0	0	0	0	0
d__Bacteria	k__norank_d__Bacteria	p__Proteobacteria	c__Gammaproteobacteria	o__Pseudomonadales	f__Moraxellaceae	g__Acinetobacter	s__unclassified_g__Acinetobacter	OTU1972	0	0	0	2	0	0	0	0	0	0	0	0	0	0	0	0	0	0	0
d__Bacteria	k__norank_d__Bacteria	p__Chloroflexi	c__Ktedonobacteria	o__Ktedonobacterales	f__Ktedonobacteraceae	g__unclassified_f__Ktedonobacteraceae	s__unclassified_f__Ktedonobacteraceae	OTU1973	0	0	0	4	0	0	0	0	0	0	0	0	0	0	0	0	0	0	0
d__Bacteria	k__norank_d__Bacteria	p__Firmicutes	c__Erysipelotrichia	o__Erysipelotrichales	f__Erysipelotrichaceae	g__Ileibacterium	s__Ileibacterium_valens	OTU1974	0	0	0	2	0	0	0	0	0	0	0	0	0	0	0	0	0	0	0
d__Bacteria	k__norank_d__Bacteria	p__Bacteroidetes	c__Bacteroidia	o__Bacteroidales	f__Muribaculaceae	g__norank_f__Muribaculaceae	s__uncultured_Bacteroidales_bacterium_g__norank_f__Muribaculaceae	OTU1975	115	0	0	7	0	2	0	0	0	0	8	3	0	0	0	0	0	0	1
d__Bacteria	k__norank_d__Bacteria	p__Actinobacteria	c__Actinobacteria	o__Corynebacteriales	f__Corynebacteriaceae	g__Corynebacterium_1	s__unclassified_g__Corynebacterium_1	OTU1976	4	1	0	2	3	0	0	2	0	0	1	0	2	0	0	0	0	0	0
d__Bacteria	k__norank_d__Bacteria	p__Firmicutes	c__Clostridia	o__Clostridiales	f__Lachnospiraceae	g__norank_f__Lachnospiraceae	s__uncultured_bacterium_g__norank_f__Lachnospiraceae	OTU1977	1	0	0	2	0	0	0	0	0	0	0	0	0	0	0	0	0	0	0
d__Bacteria	k__norank_d__Bacteria	p__Proteobacteria	c__Alphaproteobacteria	o__Rickettsiales	f__Mitochondria	g__norank_f__Mitochondria	s__unclassified_g__norank_f__Mitochondria	OTU1978	2	0	0	9	2	1	2	1	6	1	4	1	0	0	0	0	0	0	0
d__Bacteria	k__norank_d__Bacteria	p__Bacteroidetes	c__Bacteroidia	o__Bacteroidales	f__Prevotellaceae	g__Alloprevotella	s__gut_metagenome_g__Alloprevotella	OTU1979	4	1	1	15	2	0	4	0	1	0	0	0	0	0	0	0	0	1	1
d__Bacteria	k__norank_d__Bacteria	p__Proteobacteria	c__Gammaproteobacteria	o__Betaproteobacteriales	f__Burkholderiaceae	g__Parasutterella	s__Burkholderiales_bacterium_YL45	OTU198	5	0	0	0	0	0	0	0	0	0	0	0	0	0	0	0	0	0	0
d__Bacteria	k__norank_d__Bacteria	p__Bacteroidetes	c__Bacteroidia	o__Chitinophagales	f__Chitinophagaceae	g__norank_f__Chitinophagaceae	s__unclassified_g__norank_f__Chitinophagaceae	OTU1980	0	0	0	2	0	0	0	0	0	0	0	0	0	0	0	0	0	0	0
d__Bacteria	k__norank_d__Bacteria	p__Cyanobacteria	c__Oxyphotobacteria	o__Chloroplast	f__norank_o__Chloroplast	g__norank_o__Chloroplast	s__Poterioochromonas_sp._DS	OTU1981	13	14	1	26	35	7	16	1	3	3	46	36	0	0	0	0	0	0	0
d__Bacteria	k__norank_d__Bacteria	p__Proteobacteria	c__Gammaproteobacteria	o__Pseudomonadales	f__Moraxellaceae	g__Acinetobacter	s__Acinetobacter_lwoffii	OTU1982	0	0	0	1	0	6	0	1	0	1	7	2	0	0	0	0	0	0	0
d__Bacteria	k__norank_d__Bacteria	p__Firmicutes	c__Clostridia	o__Clostridiales	f__Lachnospiraceae	g__unclassified_f__Lachnospiraceae	s__unclassified_f__Lachnospiraceae	OTU1983	0	0	0	1	0	0	0	0	0	0	0	0	0	0	0	0	0	0	0
d__Bacteria	k__norank_d__Bacteria	p__Actinobacteria	c__Actinobacteria	o__Micrococcales	f__Intrasporangiaceae	g__unclassified_f__Intrasporangiaceae	s__unclassified_f__Intrasporangiaceae	OTU1984	3	0	0	0	2	0	0	0	0	0	0	3	0	0	0	0	0	0	0
d__Bacteria	k__norank_d__Bacteria	p__Actinobacteria	c__Actinobacteria	o__Frankiales	f__Sporichthyaceae	g__hgcI_clade	s__uncultured_Actinomycetales_bacterium_g__hgcI_clade	OTU1985	0	0	0	0	4	0	0	0	0	0	0	6	0	0	0	0	0	0	0
d__Bacteria	k__norank_d__Bacteria	p__unclassified_k__norank_d__Bacteria	c__unclassified_k__norank_d__Bacteria	o__unclassified_k__norank_d__Bacteria	f__unclassified_k__norank_d__Bacteria	g__unclassified_k__norank_d__Bacteria	s__unclassified_k__norank_d__Bacteria	OTU1986	0	0	0	0	2	0	0	0	0	0	0	0	0	0	0	0	0	0	0
d__Bacteria	k__norank_d__Bacteria	p__Firmicutes	c__Bacilli	o__Lactobacillales	f__Carnobacteriaceae	g__Lacticigenium	s__uncultured_bacterium_g__Lacticigenium	OTU1987	0	0	0	0	1	0	0	0	0	0	0	0	0	0	0	0	0	0	0
d__Bacteria	k__norank_d__Bacteria	p__Actinobacteria	c__Actinobacteria	o__Streptosporangiales	f__Thermomonosporaceae	g__Actinoallomurus	s__unclassified_g__Actinoallomurus	OTU1988	0	0	0	0	2	0	0	0	0	0	0	0	0	0	0	0	0	0	0
d__Bacteria	k__norank_d__Bacteria	p__Bacteroidetes	c__Bacteroidia	o__Bacteroidales	f__Bacteroidaceae	g__Bacteroides	s__Bacteroides_thetaiotaomicron	OTU1989	1	0	0	0	5	0	0	1	0	0	0	0	0	0	0	0	0	0	0
d__Bacteria	k__norank_d__Bacteria	p__Actinobacteria	c__Actinobacteria	o__Corynebacteriales	f__Nocardiaceae	g__Rhodococcus	s__Rhodococcus_fascians	OTU199	1	1	0	0	1	0	0	0	0	0	0	0	0	0	0	0	0	0	0
d__Bacteria	k__norank_d__Bacteria	p__Actinobacteria	c__Actinobacteria	o__Microtrichales	f__Ilumatobacteraceae	g__CL500-29_marine_group	s__metagenome_g__CL500-29_marine_group	OTU1990	0	0	0	0	3	0	0	0	0	0	0	0	0	0	0	0	0	0	0
d__Bacteria	k__norank_d__Bacteria	p__Proteobacteria	c__Gammaproteobacteria	o__unclassified_c__Gammaproteobacteria	f__unclassified_c__Gammaproteobacteria	g__unclassified_c__Gammaproteobacteria	s__unclassified_c__Gammaproteobacteria	OTU1991	0	0	0	0	2	0	0	0	0	0	0	0	0	0	0	0	0	0	0
d__Bacteria	k__norank_d__Bacteria	p__Actinobacteria	c__Actinobacteria	o__Bifidobacteriales	f__Bifidobacteriaceae	g__Bifidobacterium	s__Bifidobacterium_catenulatum_DSM_16992__JCM_1194__LMG_11043	OTU1992	2	0	0	0	3	0	0	0	0	0	0	0	0	0	0	0	0	0	0
d__Bacteria	k__norank_d__Bacteria	p__Firmicutes	c__Bacilli	o__Lactobacillales	f__Lactobacillaceae	g__Lactobacillus	s__Lactobacillus_sakei	OTU1993	0	0	0	0	2	0	0	0	0	0	0	0	0	0	1	0	0	0	0
d__Bacteria	k__norank_d__Bacteria	p__unclassified_k__norank_d__Bacteria	c__unclassified_k__norank_d__Bacteria	o__unclassified_k__norank_d__Bacteria	f__unclassified_k__norank_d__Bacteria	g__unclassified_k__norank_d__Bacteria	s__unclassified_k__norank_d__Bacteria	OTU1994	0	0	0	0	4	0	0	0	0	0	0	0	0	0	0	0	0	0	0
d__Bacteria	k__norank_d__Bacteria	p__Proteobacteria	c__Gammaproteobacteria	o__Steroidobacterales	f__Steroidobacteraceae	g__norank_f__Steroidobacteraceae	s__uncultured_bacterium_g__norank_f__Steroidobacteraceae	OTU1995	0	0	0	0	2	0	0	0	0	0	0	0	0	0	0	0	0	0	0
d__Bacteria	k__norank_d__Bacteria	p__Proteobacteria	c__Gammaproteobacteria	o__Diplorickettsiales	f__Diplorickettsiaceae	g__norank_f__Diplorickettsiaceae	s__uncultured_gamma_proteobacterium_g__norank_f__Diplorickettsiaceae	OTU1996	0	0	0	0	2	0	0	0	0	0	0	0	0	0	0	0	0	0	0
d__Bacteria	k__norank_d__Bacteria	p__Bacteroidetes	c__Bacteroidia	o__Bacteroidales	f__Barnesiellaceae	g__Barnesiella	s__uncultured_bacterium_g__Barnesiella	OTU1997	0	0	0	0	1	0	0	0	0	0	0	0	0	0	0	0	0	0	0
d__Bacteria	k__norank_d__Bacteria	p__Firmicutes	c__Limnochordia	o__Limnochordales	f__Limnochordaceae	g__norank_f__Limnochordaceae	s__unclassified_g__norank_f__Limnochordaceae	OTU1998	0	0	0	0	2	0	0	0	0	0	0	0	0	0	0	0	0	0	0
d__Bacteria	k__norank_d__Bacteria	p__Proteobacteria	c__Alphaproteobacteria	o__Rickettsiales	f__SM2D12	g__norank_f__SM2D12	s__metagenome_g__norank_f__SM2D12	OTU1999	0	0	0	0	3	0	0	0	0	0	0	0	0	0	0	0	0	0	0
d__Bacteria	k__norank_d__Bacteria	p__Bacteroidetes	c__Bacteroidia	o__Bacteroidales	f__Muribaculaceae	g__norank_f__Muribaculaceae	s__uncultured_bacterium_g__norank_f__Muribaculaceae	OTU2	0	0	0	0	0	2	0	0	0	0	0	0	0	0	0	0	0	0	0
d__Bacteria	k__norank_d__Bacteria	p__Bacteroidetes	c__Bacteroidia	o__Bacteroidales	f__Rikenellaceae	g__Alistipes	s__uncultured_bacterium_g__Alistipes	OTU20	5	0	0	0	0	0	1	0	0	0	0	8	0	0	0	4	0	5	0
d__Bacteria	k__norank_d__Bacteria	p__Proteobacteria	c__Gammaproteobacteria	o__Run-SP154	f__norank_o__Run-SP154	g__norank_o__Run-SP154	s__unclassified_g__norank_o__Run-SP154	OTU200	1	0	0	0	0	0	0	0	0	0	0	0	0	0	0	0	0	0	0
d__Bacteria	k__norank_d__Bacteria	p__Proteobacteria	c__Alphaproteobacteria	o__Rickettsiales	f__Rickettsiaceae	g__Candidatus_Megaira	s__uncultured_bacterium_g__Candidatus_Megaira	OTU2000	0	0	0	0	1	0	0	0	0	0	0	0	0	0	0	0	0	0	0
d__Bacteria	k__norank_d__Bacteria	p__Bacteroidetes	c__Bacteroidia	o__Bacteroidales	f__Bacteroidaceae	g__Bacteroides	s__Bacteroides_coprocola_DSM_17136	OTU2001	0	0	0	0	3	0	0	0	0	0	0	0	0	0	0	0	0	0	0
d__Bacteria	k__norank_d__Bacteria	p__Firmicutes	c__Clostridia	o__Clostridiales	f__Family_XI_o__Clostridiales	g__Sporanaerobacter	s__uncultured_bacterium_g__Sporanaerobacter	OTU2002	1	0	0	0	3	0	0	0	0	0	0	0	0	0	0	0	0	0	0
d__Bacteria	k__norank_d__Bacteria	p__Proteobacteria	c__Gammaproteobacteria	o__Betaproteobacteriales	f__Burkholderiaceae	g__Delftia	s__uncultured_organism_g__Delftia	OTU2003	1	0	0	0	1	0	0	0	0	0	2	0	0	0	0	0	0	0	0
d__Bacteria	k__norank_d__Bacteria	p__Bacteroidetes	c__Bacteroidia	o__Bacteroidales	f__Rikenellaceae	g__Alistipes	s__uncultured_bacterium_g__Alistipes	OTU2004	3	0	0	0	0	0	0	0	0	0	0	0	0	0	0	0	0	1	0
d__Bacteria	k__norank_d__Bacteria	p__Actinobacteria	c__Actinobacteria	o__Micrococcales	f__Microbacteriaceae	g__Amnibacterium	s__uncultured_bacterium_g__Amnibacterium	OTU2005	0	4	0	0	4	0	0	0	0	0	0	0	0	0	0	0	0	0	0
d__Bacteria	k__norank_d__Bacteria	p__Bacteroidetes	c__Bacteroidia	o__Bacteroidales	f__Tannerellaceae	g__Parabacteroides	s__unclassified_g__Parabacteroides	OTU2006	2	0	0	1	3	0	0	0	0	0	0	0	0	0	0	0	0	0	0
d__Bacteria	k__norank_d__Bacteria	p__Proteobacteria	c__Gammaproteobacteria	o__Betaproteobacteriales	f__Nitrosomonadaceae	g__Ellin6067	s__uncultured_beta_proteobacterium_g__Ellin6067	OTU2007	1	0	0	0	1	0	0	0	0	0	0	0	0	0	0	0	0	0	0
d__Bacteria	k__norank_d__Bacteria	p__Proteobacteria	c__Gammaproteobacteria	o__Betaproteobacteriales	f__Burkholderiaceae	g__Burkholderia-Caballeronia-Paraburkholderia	s__unclassified_g__Burkholderia-Caballeronia-Paraburkholderia	OTU2008	0	1	0	1	2	2	0	0	0	0	1	1	0	0	0	0	0	0	0
d__Bacteria	k__norank_d__Bacteria	p__Bacteroidetes	c__Bacteroidia	o__Chitinophagales	f__Saprospiraceae	g__norank_f__Saprospiraceae	s__unclassified_g__norank_f__Saprospiraceae	OTU2009	0	0	0	0	4	0	0	0	0	0	0	0	0	0	0	0	0	0	0
d__Bacteria	k__norank_d__Bacteria	p__Firmicutes	c__Bacilli	o__Bacillales	f__Bacillaceae	g__norank_f__Bacillaceae	s__unclassified_g__norank_f__Bacillaceae	OTU201	6	0	0	0	0	0	0	0	0	0	0	0	0	0	0	0	0	0	0
d__Bacteria	k__norank_d__Bacteria	p__Firmicutes	c__Bacilli	o__Lactobacillales	f__Lactobacillaceae	g__Pediococcus	s__Pediococcus_pentosaceus_g__Pediococcus	OTU2010	0	0	0	0	10	0	0	0	0	0	0	0	0	0	0	0	0	0	0
d__Bacteria	k__norank_d__Bacteria	p__Bacteroidetes	c__Bacteroidia	o__Flavobacteriales	f__Weeksellaceae	g__Algoriella	s__Algoriella_xinjiangensis	OTU2011	0	0	0	0	3	0	0	0	0	0	0	0	0	0	0	0	0	0	0
d__Bacteria	k__norank_d__Bacteria	p__Chloroflexi	c__unclassified_p__Chloroflexi	o__unclassified_p__Chloroflexi	f__unclassified_p__Chloroflexi	g__unclassified_p__Chloroflexi	s__unclassified_p__Chloroflexi	OTU2012	0	0	0	0	2	0	0	0	0	0	0	0	0	0	0	0	0	0	0
d__Bacteria	k__norank_d__Bacteria	p__Firmicutes	c__Clostridia	o__Clostridiales	f__Lachnospiraceae	g__unclassified_f__Lachnospiraceae	s__unclassified_f__Lachnospiraceae	OTU2013	0	0	0	0	4	0	0	0	0	0	0	0	0	0	0	0	0	0	0
d__Bacteria	k__norank_d__Bacteria	p__Proteobacteria	c__Gammaproteobacteria	o__Pseudomonadales	f__Pseudomonadaceae	g__Pseudomonas	s__Pseudomonas_guguanensis	OTU2014	1	0	0	0	5	1	0	0	0	0	0	2	0	0	0	0	0	0	0
d__Bacteria	k__norank_d__Bacteria	p__Actinobacteria	c__Actinobacteria	o__Microtrichales	f__Ilumatobacteraceae	g__norank_f__Ilumatobacteraceae	s__uncultured_bacterium_g__norank_f__Ilumatobacteraceae	OTU2015	0	0	0	0	3	0	0	0	0	0	0	0	0	0	0	0	0	0	0
d__Bacteria	k__norank_d__Bacteria	p__Firmicutes	c__Negativicutes	o__Selenomonadales	f__Acidaminococcaceae	g__Phascolarctobacterium	s__uncultured_organism_g__Phascolarctobacterium	OTU2016	0	0	0	0	4	0	0	0	0	0	0	0	0	0	0	0	0	0	0
d__Bacteria	k__norank_d__Bacteria	p__Proteobacteria	c__Gammaproteobacteria	o__Aeromonadales	f__Aeromonadaceae	g__Aeromonas	s__unclassified_g__Aeromonas	OTU2017	0	0	0	0	2	0	0	0	0	0	0	0	0	0	0	0	0	0	0
d__Bacteria	k__norank_d__Bacteria	p__Proteobacteria	c__Alphaproteobacteria	o__Rickettsiales	f__Mitochondria	g__norank_f__Mitochondria	s__unclassified_g__norank_f__Mitochondria	OTU202	2	0	0	0	0	0	0	0	0	0	0	0	0	0	0	0	0	0	0
d__Bacteria	k__norank_d__Bacteria	p__Deferribacteres	c__Deferribacteres	o__Deferribacterales	f__Deferribacteraceae	g__Mucispirillum	s__Mucispirillum_schaedleri_ASF457	OTU203	21	0	0	0	0	0	0	0	1	0	0	0	0	0	0	0	0	0	0
d__Bacteria	k__norank_d__Bacteria	p__Firmicutes	c__Clostridia	o__Clostridiales	f__Lachnospiraceae	g__norank_f__Lachnospiraceae	s__unclassified_g__norank_f__Lachnospiraceae	OTU204	5	0	0	0	0	0	0	0	0	0	1	0	0	0	0	0	0	0	0
d__Bacteria	k__norank_d__Bacteria	p__Planctomycetes	c__Phycisphaerae	o__Phycisphaerales	f__Phycisphaeraceae	g__AKYG587	s__uncultured_bacterium_g__AKYG587	OTU205	2	0	0	0	0	0	0	0	0	0	0	0	0	0	0	0	0	0	0
d__Bacteria	k__norank_d__Bacteria	p__unclassified_k__norank_d__Bacteria	c__unclassified_k__norank_d__Bacteria	o__unclassified_k__norank_d__Bacteria	f__unclassified_k__norank_d__Bacteria	g__unclassified_k__norank_d__Bacteria	s__unclassified_k__norank_d__Bacteria	OTU206	4	0	0	0	0	0	0	0	0	0	0	0	0	0	0	0	0	0	0
d__Bacteria	k__norank_d__Bacteria	p__Firmicutes	c__Bacilli	o__Lactobacillales	f__Carnobacteriaceae	g__Atopostipes	s__uncultured_bacterium_g__Atopostipes	OTU207	8	0	0	0	0	0	0	0	0	1	8	0	0	0	0	0	0	0	0
d__Bacteria	k__norank_d__Bacteria	p__Firmicutes	c__Clostridia	o__Clostridiales	f__Lachnospiraceae	g__unclassified_f__Lachnospiraceae	s__unclassified_f__Lachnospiraceae	OTU208	8	0	0	0	0	2	0	0	0	0	0	0	0	0	0	0	0	0	0
d__Bacteria	k__norank_d__Bacteria	p__Firmicutes	c__Bacilli	o__Lactobacillales	f__Streptococcaceae	g__Streptococcus	s__unclassified_g__Streptococcus	OTU209	7	0	1	4	0	1	0	2	5	0	4	4	0	0	0	0	0	0	0
d__Bacteria	k__norank_d__Bacteria	p__Bacteroidetes	c__Bacteroidia	o__Bacteroidales	f__Muribaculaceae	g__norank_f__Muribaculaceae	s__unclassified_g__norank_f__Muribaculaceae	OTU21	0	0	0	0	0	0	0	2	0	0	0	0	0	0	0	1	0	0	0
d__Bacteria	k__norank_d__Bacteria	p__Firmicutes	c__Erysipelotrichia	o__Erysipelotrichales	f__Erysipelotrichaceae	g__Turicibacter	s__uncultured_bacterium_g__Turicibacter	OTU210	7	12	0	0	3	7	0	0	0	0	0	69	0	0	0	0	0	0	0
d__Bacteria	k__norank_d__Bacteria	p__Acidobacteria	c__Subgroup_6	o__norank_c__Subgroup_6	f__norank_c__Subgroup_6	g__norank_c__Subgroup_6	s__uncultured_Acidobacteriales_bacterium_g__norank_c__Subgroup_6	OTU211	6	0	0	0	0	0	0	0	0	0	0	0	0	0	0	0	0	0	0
d__Bacteria	k__norank_d__Bacteria	p__Firmicutes	c__Clostridia	o__Clostridiales	f__Lachnospiraceae	g__norank_f__Lachnospiraceae	s__uncultured_bacterium_g__norank_f__Lachnospiraceae	OTU212	4	0	0	0	0	0	0	0	0	0	0	0	0	0	0	0	0	0	0
d__Bacteria	k__norank_d__Bacteria	p__Patescibacteria	c__Saccharimonadia	o__Saccharimonadales	f__Saccharimonadaceae	g__norank_f__Saccharimonadaceae	s__uncultured_bacterium_g__norank_f__Saccharimonadaceae	OTU213	0	0	0	0	1	0	0	0	0	0	0	0	0	0	0	0	0	0	0
d__Bacteria	k__norank_d__Bacteria	p__Chloroflexi	c__Anaerolineae	o__SJA-15	f__norank_o__SJA-15	g__norank_o__SJA-15	s__uncultured_bacterium_g__norank_o__SJA-15	OTU214	2	0	0	0	0	0	0	0	0	0	0	0	0	0	0	0	0	0	0
d__Bacteria	k__norank_d__Bacteria	p__Proteobacteria	c__Gammaproteobacteria	o__Betaproteobacteriales	f__Burkholderiaceae	g__unclassified_f__Burkholderiaceae	s__unclassified_f__Burkholderiaceae	OTU215	0	13	0	0	1	0	0	0	0	0	0	0	0	0	0	0	0	0	0
d__Bacteria	k__norank_d__Bacteria	p__Actinobacteria	c__Actinobacteria	o__norank_c__Actinobacteria	f__norank_c__Actinobacteria	g__norank_c__Actinobacteria	s__uncultured_Firmicutes_bacterium_g__norank_c__Actinobacteria	OTU216	6	0	0	0	0	0	0	0	0	0	0	0	0	0	0	0	0	0	0
d__Bacteria	k__norank_d__Bacteria	p__Firmicutes	c__Bacilli	o__Lactobacillales	f__Enterococcaceae	g__Enterococcus	s__unclassified_g__Enterococcus	OTU217	2	0	0	0	0	0	0	0	0	0	0	0	0	0	0	0	0	0	0
d__Bacteria	k__norank_d__Bacteria	p__Chloroflexi	c__Anaerolineae	o__SBR1031	f__norank_o__SBR1031	g__norank_o__SBR1031	s__uncultured_Gemmatimonadetes_bacterium_g__norank_o__SBR1031	OTU218	7	0	0	0	0	0	0	0	0	0	2	0	0	0	0	0	0	0	0
d__Bacteria	k__norank_d__Bacteria	p__Proteobacteria	c__Deltaproteobacteria	o__Bdellovibrionales	f__Bdellovibrionaceae	g__OM27_clade	s__uncultured_bacterium_g__OM27_clade	OTU219	4	0	0	0	0	0	0	0	0	0	0	0	0	0	0	0	0	0	0
d__Bacteria	k__norank_d__Bacteria	p__Tenericutes	c__Mollicutes	o__Anaeroplasmatales	f__Anaeroplasmataceae	g__Anaeroplasma	s__uncultured_bacterium_g__Anaeroplasma	OTU22	0	0	0	0	0	0	0	1	0	0	0	0	0	0	4	2	0	0	0
d__Bacteria	k__norank_d__Bacteria	p__Actinobacteria	c__Actinobacteria	o__Bifidobacteriales	f__Bifidobacteriaceae	g__Bifidobacterium	s__unclassified_g__Bifidobacterium	OTU220	24	0	0	1	0	0	0	0	0	0	3	7	0	0	0	0	0	0	0
d__Bacteria	k__norank_d__Bacteria	p__Actinobacteria	c__Actinobacteria	o__Corynebacteriales	f__Corynebacteriaceae	g__unclassified_f__Corynebacteriaceae	s__unclassified_f__Corynebacteriaceae	OTU221	2	0	0	0	0	0	0	0	0	0	0	0	0	0	0	0	0	0	0
d__Bacteria	k__norank_d__Bacteria	p__Firmicutes	c__Clostridia	o__Clostridiales	f__Lachnospiraceae	g__norank_f__Lachnospiraceae	s__uncultured_bacterium_g__norank_f__Lachnospiraceae	OTU222	11	0	0	0	0	0	0	0	0	0	0	0	0	0	0	0	0	0	0
d__Bacteria	k__norank_d__Bacteria	p__Actinobacteria	c__Actinobacteria	o__Streptosporangiales	f__Thermomonosporaceae	g__Thermomonospora	s__unclassified_g__Thermomonospora	OTU223	2	0	0	0	0	0	0	0	0	0	0	0	0	0	0	0	0	0	0
d__Bacteria	k__norank_d__Bacteria	p__Firmicutes	c__Clostridia	o__Clostridiales	f__Family_XI_o__Clostridiales	g__Peptoniphilus	s__unclassified_g__Peptoniphilus	OTU224	1	0	0	0	0	0	0	0	0	0	0	0	0	0	0	0	0	0	0
d__Bacteria	k__norank_d__Bacteria	p__Actinobacteria	c__Actinobacteria	o__Micromonosporales	f__Micromonosporaceae	g__Luedemannella	s__uncultured_bacterium_g__Luedemannella	OTU225	3	0	0	0	0	0	0	0	0	0	0	0	0	0	0	0	0	0	0
d__Bacteria	k__norank_d__Bacteria	p__Tenericutes	c__Mollicutes	o__Mollicutes_RF39	f__norank_o__Mollicutes_RF39	g__norank_o__Mollicutes_RF39	s__unclassified_g__norank_o__Mollicutes_RF39	OTU226	1	0	0	0	0	0	0	0	0	0	0	0	0	0	0	0	0	0	0
d__Bacteria	k__norank_d__Bacteria	p__Tenericutes	c__Mollicutes	o__Mollicutes_RF39	f__norank_o__Mollicutes_RF39	g__norank_o__Mollicutes_RF39	s__uncultured_Paenibacillaceae_bacterium_g__norank	OTU227	2	0	0	0	0	0	0	0	0	0	0	0	0	0	0	0	0	0	0
d__Bacteria	k__norank_d__Bacteria	p__Firmicutes	c__Bacilli	o__Lactobacillales	f__Lactobacillaceae	g__Lactobacillus	s__uncultured_Lactobacillus_sp._g__Lactobacillus	OTU228	9	0	0	1	0	0	0	0	0	0	0	0	0	0	0	0	0	0	0
d__Bacteria	k__norank_d__Bacteria	p__Firmicutes	c__Clostridia	o__Clostridiales	f__Lachnospiraceae	g__unclassified_f__Lachnospiraceae	s__unclassified_f__Lachnospiraceae	OTU229	1	0	0	0	0	0	0	0	0	0	0	0	0	0	0	0	0	0	0
d__Bacteria	k__norank_d__Bacteria	p__unclassified_k__norank_d__Bacteria	c__unclassified_k__norank_d__Bacteria	o__unclassified_k__norank_d__Bacteria	f__unclassified_k__norank_d__Bacteria	g__unclassified_k__norank_d__Bacteria	s__unclassified_k__norank_d__Bacteria	OTU23	0	0	0	0	0	0	0	19	0	0	0	0	0	0	0	0	0	0	0
d__Bacteria	k__norank_d__Bacteria	p__Chloroflexi	c__KD4-96	o__norank_c__KD4-96	f__norank_c__KD4-96	g__norank_c__KD4-96	s__unclassified_g__norank_c__KD4-96	OTU230	11	0	0	0	0	1	0	0	0	0	0	0	0	0	0	0	0	0	0
d__Bacteria	k__norank_d__Bacteria	p__Bacteroidetes	c__Bacteroidia	o__Bacteroidales	f__Bacteroidaceae	g__Bacteroides	s__unclassified_g__Bacteroides	OTU231	41	0	0	0	0	0	0	0	0	0	0	0	0	0	0	0	0	0	0
d__Bacteria	k__norank_d__Bacteria	p__Bacteroidetes	c__Bacteroidia	o__Flavobacteriales	f__Flavobacteriaceae	g__Flavobacterium	s__unclassified_g__Flavobacterium	OTU232	2	0	0	0	0	0	0	0	0	0	0	0	0	0	0	0	0	0	0
d__Bacteria	k__norank_d__Bacteria	p__Chloroflexi	c__Anaerolineae	o__SBR1031	f__norank_o__SBR1031	g__norank_o__SBR1031	s__unclassified_g__norank_o__SBR1031	OTU233	3	0	0	0	0	0	0	0	0	0	0	0	0	0	0	0	0	0	0
d__Bacteria	k__norank_d__Bacteria	p__Firmicutes	c__Bacilli	o__Lactobacillales	f__Leuconostocaceae	g__Weissella	s__Weissella_cibaria	OTU234	5	0	0	0	0	0	0	0	0	1	6	11	0	0	0	0	0	0	0
d__Bacteria	k__norank_d__Bacteria	p__Firmicutes	c__Clostridia	o__Clostridiales	f__Lachnospiraceae	g__Lachnospiraceae_NK4A136_group	s__uncultured_bacterium_g__Lachnospiraceae_NK4A136_group	OTU235	215	0	0	1	0	0	0	0	0	4	5	13	1	0	0	0	0	0	0
d__Bacteria	k__norank_d__Bacteria	p__Actinobacteria	c__Actinobacteria	o__norank_c__Actinobacteria	f__norank_c__Actinobacteria	g__norank_c__Actinobacteria	s__unclassified_g__norank_c__Actinobacteria	OTU236	3	0	0	0	0	0	0	0	0	0	0	0	0	0	0	0	0	0	0
d__Bacteria	k__norank_d__Bacteria	p__Bacteroidetes	c__Bacteroidia	o__Bacteroidales	f__Muribaculaceae	g__norank_f__Muribaculaceae	s__uncultured_bacterium_g__norank_f__Muribaculaceae	OTU237	21	0	0	0	0	0	0	0	0	0	0	0	0	0	0	0	0	0	0
d__Bacteria	k__norank_d__Bacteria	p__Chloroflexi	c__Anaerolineae	o__SBR1031	f__A4b	g__norank_f__A4b	s__uncultured_sludge_bacterium_H8	OTU238	2	0	0	0	0	0	0	0	0	0	0	0	0	0	0	0	0	0	0
d__Bacteria	k__norank_d__Bacteria	p__Chloroflexi	c__Ktedonobacteria	o__Ktedonobacterales	f__norank_o__Ktedonobacterales	g__norank_o__Ktedonobacterales	s__uncultured_bacterium_g__norank_o__Ktedonobacterales	OTU239	3	0	0	0	0	0	0	0	0	0	0	0	0	0	0	0	0	0	0
d__Bacteria	k__norank_d__Bacteria	p__unclassified_k__norank_d__Bacteria	c__unclassified_k__norank_d__Bacteria	o__unclassified_k__norank_d__Bacteria	f__unclassified_k__norank_d__Bacteria	g__unclassified_k__norank_d__Bacteria	s__unclassified_k__norank_d__Bacteria	OTU24	0	3	0	0	2	0	0	3	0	0	0	0	0	0	0	0	0	0	0
d__Bacteria	k__norank_d__Bacteria	p__Actinobacteria	c__Actinobacteria	o__Pseudonocardiales	f__Pseudonocardiaceae	g__Thermotunica	s__unclassified_g__Thermotunica	OTU240	1	0	0	0	0	0	0	0	0	0	0	0	0	0	0	0	0	0	0
d__Bacteria	k__norank_d__Bacteria	p__Acidobacteria	c__Blastocatellia_Subgroup_4	o__Pyrinomonadales	f__Pyrinomonadaceae	g__RB41	s__unclassified_g__RB41	OTU241	1	0	0	0	0	0	0	0	0	0	0	0	0	0	0	0	0	0	0
d__Bacteria	k__norank_d__Bacteria	p__Proteobacteria	c__Gammaproteobacteria	o__Pseudomonadales	f__Pseudomonadaceae	g__Pseudomonas	s__unclassified_g__Pseudomonas	OTU243	3	0	0	0	0	0	1	0	0	0	0	0	0	0	0	0	0	1	0
d__Bacteria	k__norank_d__Bacteria	p__Planctomycetes	c__Planctomycetacia	o__Gemmatales	f__Gemmataceae	g__norank_f__Gemmataceae	s__uncultured_bacterium_g__norank_f__Gemmataceae	OTU244	5	0	0	0	0	0	0	0	0	0	0	0	0	0	0	0	0	0	0
d__Bacteria	k__norank_d__Bacteria	p__Firmicutes	c__Clostridia	o__Clostridiales	f__Clostridiaceae_1	g__Candidatus_Arthromitus	s__Candidatus_Arthromitus_sp._SFB-mouse-Japan	OTU245	10	0	0	0	0	0	0	0	0	0	2	2	0	0	0	0	0	0	0
d__Bacteria	k__norank_d__Bacteria	p__Firmicutes	c__Bacilli	o__Lactobacillales	f__Lactobacillaceae	g__Lactobacillus	s__unclassified_g__Lactobacillus	OTU246	519	0	4	19	3	5	4	1	1	3	21	37	0	0	9	6	15	25	4
d__Bacteria	k__norank_d__Bacteria	p__Firmicutes	c__Clostridia	o__Clostridiales	f__Ruminococcaceae	g__Ruminiclostridium_5	s__uncultured_bacterium_g__Ruminiclostridium_5	OTU247	4	0	0	0	0	1	1	0	0	1	0	2	0	0	0	0	0	0	0
d__Bacteria	k__norank_d__Bacteria	p__Firmicutes	c__Clostridia	o__Clostridiales	f__Lachnospiraceae	g__norank_f__Lachnospiraceae	s__uncultured_bacterium_g__norank_f__Lachnospiraceae	OTU248	2	0	0	0	0	0	0	0	0	0	1	0	0	0	0	0	0	0	0
d__Bacteria	k__norank_d__Bacteria	p__Firmicutes	c__Clostridia	o__Clostridiales	f__Peptococcaceae	g__norank_f__Peptococcaceae	s__unclassified_g__norank_f__Peptococcaceae	OTU249	2	0	0	0	0	0	0	0	0	0	0	0	0	0	0	0	0	0	0
d__Bacteria	k__norank_d__Bacteria	p__Bacteroidetes	c__Bacteroidia	o__Bacteroidales	f__Muribaculaceae	g__norank_f__Muribaculaceae	s__uncultured_bacterium_g__norank_f__Muribaculaceae	OTU25	1	0	0	1	1	0	0	1	2	1	1	0	0	1	0	2	0	0	0
d__Bacteria	k__norank_d__Bacteria	p__Actinobacteria	c__Actinobacteria	o__IMCC26256	f__norank_o__IMCC26256	g__norank_o__IMCC26256	s__uncultured_Ferrimicrobium_sp._g__norank	OTU250	4	0	0	0	0	0	0	0	0	0	0	0	0	0	0	0	0	0	0
d__Bacteria	k__norank_d__Bacteria	p__Bacteroidetes	c__Bacteroidia	o__Bacteroidales	f__Prevotellaceae	g__Alloprevotella	s__unclassified_g__Alloprevotella	OTU251	1	0	0	0	0	0	0	0	0	0	0	0	0	0	0	0	0	0	0
d__Bacteria	k__norank_d__Bacteria	p__Firmicutes	c__unclassified_p__Firmicutes	o__unclassified_p__Firmicutes	f__unclassified_p__Firmicutes	g__unclassified_p__Firmicutes	s__unclassified_p__Firmicutes	OTU252	4	0	0	0	0	0	0	0	0	0	0	0	0	0	0	0	0	0	0
d__Bacteria	k__norank_d__Bacteria	p__Firmicutes	c__Clostridia	o__Clostridiales	f__Lachnospiraceae	g__unclassified_f__Lachnospiraceae	s__unclassified_f__Lachnospiraceae	OTU253	9	0	0	0	0	0	0	0	0	0	0	0	0	0	0	0	0	0	0
d__Bacteria	k__norank_d__Bacteria	p__unclassified_k__norank_d__Bacteria	c__unclassified_k__norank_d__Bacteria	o__unclassified_k__norank_d__Bacteria	f__unclassified_k__norank_d__Bacteria	g__unclassified_k__norank_d__Bacteria	s__unclassified_k__norank_d__Bacteria	OTU254	1	0	0	0	0	0	0	0	0	0	0	0	0	0	0	0	0	0	0
d__Bacteria	k__norank_d__Bacteria	p__Bacteroidetes	c__Bacteroidia	o__Bacteroidales	f__Muribaculaceae	g__norank_f__Muribaculaceae	s__uncultured_bacterium_g__norank_f__Muribaculaceae	OTU255	32	0	0	1	0	0	0	0	0	0	1	0	0	0	0	0	0	0	0
d__Bacteria	k__norank_d__Bacteria	p__Chloroflexi	c__Anaerolineae	o__SBR1031	f__A4b	g__norank_f__A4b	s__uncultured_bacterium_g__norank_f__A4b	OTU256	2	0	0	0	0	0	0	0	0	0	0	0	0	0	0	0	0	0	0
d__Bacteria	k__norank_d__Bacteria	p__Bacteroidetes	c__Bacteroidia	o__Bacteroidales	f__Rikenellaceae	g__Alistipes	s__uncultured_bacterium_g__Alistipes	OTU257	2	0	0	0	0	1	0	0	0	0	0	0	0	0	0	0	0	0	0
d__Bacteria	k__norank_d__Bacteria	p__Proteobacteria	c__Gammaproteobacteria	o__Betaproteobacteriales	f__Rhodocyclaceae	g__Dechloromonas	s__unclassified_g__Dechloromonas	OTU258	1	3	0	3	0	0	0	0	0	0	0	0	0	0	0	0	0	0	0
d__Bacteria	k__norank_d__Bacteria	p__Bacteroidetes	c__Bacteroidia	o__Bacteroidales	f__Bacteroidaceae	g__Bacteroides	s__Bacteroides_acidifaciens	OTU26	13	0	0	0	9	0	0	2	0	1	1	5	0	0	0	1	0	0	0
d__Bacteria	k__norank_d__Bacteria	p__Chloroflexi	c__Chloroflexia	o__Thermomicrobiales	f__JG30-KF-CM45	g__norank_f__JG30-KF-CM45	s__uncultured_bacterium_g__norank_f__JG30-KF-CM45	OTU260	2	0	0	0	0	0	0	0	0	0	0	0	0	0	0	0	0	0	0
d__Bacteria	k__norank_d__Bacteria	p__Actinobacteria	c__Actinobacteria	o__Microtrichales	f__Iamiaceae	g__Iamia	s__metagenome_g__Iamia	OTU261	3	1	0	0	0	0	0	0	0	0	0	0	0	0	0	0	0	0	0
d__Bacteria	k__norank_d__Bacteria	p__Acidobacteria	c__Subgroup_6	o__norank_c__Subgroup_6	f__norank_c__Subgroup_6	g__norank_c__Subgroup_6	s__unclassified_g__norank_c__Subgroup_6	OTU262	3	0	0	0	0	0	0	0	0	0	0	0	0	0	0	0	0	0	0
d__Bacteria	k__norank_d__Bacteria	p__Proteobacteria	c__Alphaproteobacteria	o__Sphingomonadales	f__Sphingomonadaceae	g__Sphingomonas	s__Sphingomonas_paucimobilis_g__Sphingomonas	OTU263	8	0	0	1	2	1	3	0	0	0	14	1	0	0	0	0	0	0	0
d__Bacteria	k__norank_d__Bacteria	p__Firmicutes	c__Clostridia	o__Clostridiales	f__Family_XI_o__Clostridiales	g__Peptoniphilus	s__unclassified_g__Peptoniphilus	OTU264	2	0	0	0	0	0	0	0	0	0	0	0	0	0	0	0	0	0	0
d__Bacteria	k__norank_d__Bacteria	p__Armatimonadetes	c__norank_p__Armatimonadetes	o__norank_p__Armatimonadetes	f__norank_p__Armatimonadetes	g__norank_p__Armatimonadetes	s__unclassified_g__norank_p__Armatimonadetes	OTU265	1	0	0	0	0	0	0	0	0	0	0	0	0	0	0	0	0	0	0
d__Bacteria	k__norank_d__Bacteria	p__Firmicutes	c__Clostridia	o__Clostridiales	f__Lachnospiraceae	g__norank_f__Lachnospiraceae	s__Clostridium_sp._Clone-17	OTU266	29	0	0	0	0	1	0	0	0	0	0	0	0	1	0	0	0	0	0
d__Bacteria	k__norank_d__Bacteria	p__Firmicutes	c__Clostridia	o__Clostridiales	f__Lachnospiraceae	g__Lachnospiraceae_NK4A136_group	s__uncultured_bacterium_g__Lachnospiraceae_NK4A136_group	OTU267	22	0	0	0	0	0	0	0	0	0	0	2	0	0	0	0	0	0	0
d__Bacteria	k__norank_d__Bacteria	p__Actinobacteria	c__Actinobacteria	o__norank_c__Actinobacteria	f__norank_c__Actinobacteria	g__norank_c__Actinobacteria	s__uncultured_bacterium_0425-2M17	OTU268	1	0	0	0	0	0	0	0	0	0	0	0	0	0	0	0	0	0	0
d__Bacteria	k__norank_d__Bacteria	p__Actinobacteria	c__Actinobacteria	o__Gaiellales	f__unclassified_o__Gaiellales	g__unclassified_o__Gaiellales	s__unclassified_o__Gaiellales	OTU269	1	0	0	0	0	0	0	0	0	0	0	0	0	0	0	0	0	0	0
d__Bacteria	k__norank_d__Bacteria	p__unclassified_k__norank_d__Bacteria	c__unclassified_k__norank_d__Bacteria	o__unclassified_k__norank_d__Bacteria	f__unclassified_k__norank_d__Bacteria	g__unclassified_k__norank_d__Bacteria	s__unclassified_k__norank_d__Bacteria	OTU27	0	0	0	1	0	0	0	8	0	0	0	1	0	0	0	0	0	0	0
d__Bacteria	k__norank_d__Bacteria	p__Firmicutes	c__Clostridia	o__Clostridiales	f__Lachnospiraceae	g__unclassified_f__Lachnospiraceae	s__unclassified_f__Lachnospiraceae	OTU270	5	0	0	0	0	0	0	0	0	0	0	0	0	0	0	0	0	0	0
d__Bacteria	k__norank_d__Bacteria	p__Proteobacteria	c__Gammaproteobacteria	o__Pseudomonadales	f__Moraxellaceae	g__Acinetobacter	s__Acinetobacter_soli	OTU271	2	0	0	2	0	0	0	2	0	2	3	3	0	0	0	0	0	0	0
d__Bacteria	k__norank_d__Bacteria	p__Firmicutes	c__Clostridia	o__Clostridiales	f__Ruminococcaceae	g__Ruminococcaceae_UCG-014	s__unclassified_g__Ruminococcaceae_UCG-014	OTU272	7	0	0	0	0	0	0	0	0	0	1	0	0	0	0	0	0	0	0
d__Bacteria	k__norank_d__Bacteria	p__Proteobacteria	c__Gammaproteobacteria	o__Xanthomonadales	f__Xanthomonadaceae	g__Lysobacter	s__unclassified_g__Lysobacter	OTU273	3	0	0	0	0	0	0	0	0	0	0	0	0	0	0	0	0	0	0
d__Bacteria	k__norank_d__Bacteria	p__Bacteroidetes	c__Bacteroidia	o__Bacteroidales	f__Bacteroidaceae	g__Bacteroides	s__uncultured_prokaryote_g__Bacteroides	OTU274	20	0	0	2	0	0	0	0	0	0	0	0	0	0	0	0	0	0	0
d__Bacteria	k__norank_d__Bacteria	p__Acidobacteria	c__Subgroup_6	o__norank_c__Subgroup_6	f__norank_c__Subgroup_6	g__norank_c__Subgroup_6	s__uncultured_bacterium_g__norank_c__Subgroup_6	OTU275	1	0	0	0	0	0	0	0	0	0	0	0	0	0	0	0	0	0	0
d__Bacteria	k__norank_d__Bacteria	p__Bacteroidetes	c__Bacteroidia	o__Cytophagales	f__Cyclobacteriaceae	g__Algoriphagus	s__unclassified_g__Algoriphagus	OTU276	3	0	0	0	0	0	0	0	0	0	0	0	0	0	0	0	0	0	0
d__Bacteria	k__norank_d__Bacteria	p__Proteobacteria	c__Alphaproteobacteria	o__Sphingomonadales	f__Sphingomonadaceae	g__Sphingomonas	s__unclassified_g__Sphingomonas	OTU277	2	0	0	0	0	0	0	0	0	0	0	0	0	0	0	0	0	0	0
d__Bacteria	k__norank_d__Bacteria	p__Proteobacteria	c__Alphaproteobacteria	o__Rhodospirillales	f__norank_o__Rhodospirillales	g__norank_o__Rhodospirillales	s__gut_metagenome_g__norank_o__Rhodospirillales	OTU278	4	0	0	0	0	0	0	0	0	0	0	0	0	0	0	0	0	0	0
d__Bacteria	k__norank_d__Bacteria	p__Firmicutes	c__Clostridia	o__Clostridiales	f__unclassified_o__Clostridiales	g__unclassified_o__Clostridiales	s__unclassified_o__Clostridiales	OTU279	5	0	0	0	0	0	0	0	0	0	0	0	0	0	0	0	0	0	0
d__Bacteria	k__norank_d__Bacteria	p__Chloroflexi	c__Anaerolineae	o__Anaerolineales	f__Anaerolineaceae	g__norank_f__Anaerolineaceae	s__uncultured_Anaerolineaceae_bacterium_g__norank_f__Anaerolineaceae	OTU28	0	1	0	0	0	0	0	2	0	0	0	0	0	0	0	0	0	0	0
d__Bacteria	k__norank_d__Bacteria	p__Firmicutes	c__Clostridia	o__Thermoanaerobacterales	f__Family_III	g__Tepidanaerobacter	s__uncultured_Thermoanaerobacterales_bacterium_g__Tepidanaerobacter	OTU281	2	0	0	0	0	0	0	0	0	0	0	0	0	0	0	0	0	0	0
d__Bacteria	k__norank_d__Bacteria	p__Actinobacteria	c__Actinobacteria	o__Pseudonocardiales	f__Pseudonocardiaceae	g__Thermocrispum	s__Thermocrispum_municipale	OTU282	2	0	0	0	0	0	0	0	0	0	3	0	0	0	0	0	0	0	0
d__Bacteria	k__norank_d__Bacteria	p__Actinobacteria	c__Actinobacteria	o__Propionibacteriales	f__Nocardioidaceae	g__Marmoricola	s__unclassified_g__Marmoricola	OTU284	12	0	0	0	0	0	0	0	0	0	0	1	0	0	0	0	0	0	0
d__Bacteria	k__norank_d__Bacteria	p__Firmicutes	c__Clostridia	o__Clostridiales	f__Heliobacteriaceae	g__Hydrogenispora	s__unclassified_g__Hydrogenispora	OTU285	3	0	0	0	0	0	0	0	0	0	0	0	0	0	0	0	0	0	0
d__Bacteria	k__norank_d__Bacteria	p__Proteobacteria	c__Gammaproteobacteria	o__Betaproteobacteriales	f__Methylophilaceae	g__Methylophilus	s__uncultured_bacterium_g__Methylophilus	OTU286	2	0	0	0	0	0	0	0	0	0	0	0	0	0	0	0	0	0	0
d__Bacteria	k__norank_d__Bacteria	p__Acidobacteria	c__Subgroup_6	o__norank_c__Subgroup_6	f__norank_c__Subgroup_6	g__norank_c__Subgroup_6	s__unclassified_g__norank_c__Subgroup_6	OTU287	1	0	0	0	0	0	0	0	0	0	0	0	0	0	0	0	0	0	0
d__Bacteria	k__norank_d__Bacteria	p__Proteobacteria	c__Gammaproteobacteria	o__Betaproteobacteriales	f__Burkholderiaceae	g__Burkholderia-Caballeronia-Paraburkholderia	s__unclassified_g__Burkholderia-Caballeronia-Paraburkholderia	OTU288	1	0	0	4	0	0	0	1	0	2	1	1	0	0	0	0	0	0	0
d__Bacteria	k__norank_d__Bacteria	p__Firmicutes	c__Clostridia	o__Clostridiales	f__Lachnospiraceae	g__norank_f__Lachnospiraceae	s__unclassified_g__norank_f__Lachnospiraceae	OTU289	3	0	0	0	0	0	0	0	0	0	0	0	0	0	0	0	0	0	0
d__Bacteria	k__norank_d__Bacteria	p__Firmicutes	c__Bacilli	o__Bacillales	f__Staphylococcaceae	g__Nosocomiicoccus	s__uncultured_bacterium_g__Nosocomiicoccus	OTU29	0	0	0	0	0	0	0	3	0	0	0	0	0	0	0	0	0	0	0
d__Bacteria	k__norank_d__Bacteria	p__Proteobacteria	c__Deltaproteobacteria	o__Desulfovibrionales	f__Desulfovibrionaceae	g__Bilophila	s__uncultured_bacterium_g__Bilophila	OTU290	14	1	0	0	0	1	0	0	0	0	0	1	0	0	0	0	0	0	0
d__Bacteria	k__norank_d__Bacteria	p__Acidobacteria	c__Acidobacteriia	o__Solibacterales	f__Solibacteraceae_Subgroup_3	g__Candidatus_Solibacter	s__unclassified_g__Candidatus_Solibacter	OTU291	3	0	0	0	0	0	0	0	0	0	0	0	0	0	0	0	0	0	0
d__Bacteria	k__norank_d__Bacteria	p__Chloroflexi	c__Chloroflexia	o__Chloroflexales	f__Roseiflexaceae	g__norank_f__Roseiflexaceae	s__uncultured_bacterium_g__norank_f__Roseiflexaceae	OTU292	2	0	0	0	0	0	0	0	0	0	0	0	0	0	0	0	0	0	0
d__Bacteria	k__norank_d__Bacteria	p__Planctomycetes	c__Phycisphaerae	o__Phycisphaerales	f__Phycisphaeraceae	g__AKYG587	s__uncultured_bacterium_g__AKYG587	OTU293	4	0	0	0	0	0	0	0	0	0	0	0	0	0	0	0	0	0	0
d__Bacteria	k__norank_d__Bacteria	p__Bacteroidetes	c__Bacteroidia	o__Bacteroidales	f__Muribaculaceae	g__norank_f__Muribaculaceae	s__uncultured_bacterium_g__norank_f__Muribaculaceae	OTU294	3	0	0	0	0	0	0	0	0	0	0	0	0	0	0	0	0	0	0
d__Bacteria	k__norank_d__Bacteria	p__Firmicutes	c__Clostridia	o__Clostridiales	f__Family_XI_o__Clostridiales	g__Gallicola	s__Peptostreptococcaceae_bacterium_SK031	OTU295	21	0	0	0	0	0	0	0	0	0	0	0	0	0	0	0	0	0	0
d__Bacteria	k__norank_d__Bacteria	p__Chloroflexi	c__TK10	o__norank_c__TK10	f__norank_c__TK10	g__norank_c__TK10	s__unclassified_g__norank_c__TK10	OTU296	2	0	0	0	0	0	0	0	0	0	0	0	0	0	0	0	0	0	0
d__Bacteria	k__norank_d__Bacteria	p__Firmicutes	c__Bacilli	o__Bacillales	f__Bacillaceae	g__unclassified_f__Bacillaceae	s__unclassified_f__Bacillaceae	OTU297	2	0	0	0	0	0	0	0	0	0	0	0	0	0	0	0	0	0	0
d__Bacteria	k__norank_d__Bacteria	p__Proteobacteria	c__Gammaproteobacteria	o__Pseudomonadales	f__Pseudomonadaceae	g__Azotobacter	s__Azotobacter_vinelandii_g__Azotobacter	OTU298	2	2	0	0	0	0	0	0	1	2	1	2	0	0	0	0	0	0	0
d__Bacteria	k__norank_d__Bacteria	p__Actinobacteria	c__Actinobacteria	o__norank_c__Actinobacteria	f__norank_c__Actinobacteria	g__norank_c__Actinobacteria	s__uncultured_Catenulispora_sp._g__norank	OTU299	2	0	0	0	0	0	0	0	0	0	0	0	0	0	0	0	0	0	0
d__Bacteria	k__norank_d__Bacteria	p__Bacteroidetes	c__Bacteroidia	o__Bacteroidales	f__Muribaculaceae	g__norank_f__Muribaculaceae	s__uncultured_bacterium_g__norank_f__Muribaculaceae	OTU3	0	0	0	0	0	2	0	0	0	0	0	0	0	0	0	0	0	0	0
d__Bacteria	k__norank_d__Bacteria	p__Actinobacteria	c__Actinobacteria	o__Coriobacteriales	f__Coriobacteriaceae	g__Collinsella	s__Collinsella_sp._Marseille-P3740	OTU30	0	0	0	1	1	0	0	0	0	0	0	0	0	0	0	0	0	0	0
d__Bacteria	k__norank_d__Bacteria	p__Proteobacteria	c__Alphaproteobacteria	o__Azospirillales	f__norank_o__Azospirillales	g__norank_o__Azospirillales	s__uncultured_bacterium_g__norank_o__Azospirillales	OTU300	0	0	0	0	0	0	0	0	0	0	0	1	0	0	0	0	0	0	0
d__Bacteria	k__norank_d__Bacteria	p__Firmicutes	c__Bacilli	o__Bacillales	f__Bacillaceae	g__unclassified_f__Bacillaceae	s__unclassified_f__Bacillaceae	OTU301	2	0	0	0	0	0	0	0	0	0	0	0	0	0	0	0	0	0	0
d__Bacteria	k__norank_d__Bacteria	p__Bacteroidetes	c__Bacteroidia	o__Bacteroidales	f__unclassified_o__Bacteroidales	g__unclassified_o__Bacteroidales	s__unclassified_o__Bacteroidales	OTU302	1	0	0	0	0	0	0	0	0	0	0	0	0	0	0	0	0	0	0
d__Bacteria	k__norank_d__Bacteria	p__Bacteroidetes	c__Bacteroidia	o__Chitinophagales	f__Chitinophagaceae	g__norank_f__Chitinophagaceae	s__uncultured_Flavobacterium_sp._g__norank_f__Chitinophagaceae	OTU303	2	0	0	0	0	0	0	0	0	0	0	0	0	0	0	0	0	0	0
d__Bacteria	k__norank_d__Bacteria	p__Actinobacteria	c__Actinobacteria	o__IMCC26256	f__norank_o__IMCC26256	g__norank_o__IMCC26256	s__uncultured_Actinomycetales_bacterium_g__norank_o__IMCC26256	OTU304	5	0	0	0	0	0	0	0	0	0	0	0	0	0	0	0	0	0	0
d__Bacteria	k__norank_d__Bacteria	p__Actinobacteria	c__Actinobacteria	o__Gaiellales	f__Gaiellaceae	g__Gaiella	s__unclassified_g__Gaiella	OTU305	4	0	0	0	0	0	0	0	0	0	0	0	0	0	0	0	0	0	0
d__Bacteria	k__norank_d__Bacteria	p__Chloroflexi	c__Gitt-GS-136	o__norank_c__Gitt-GS-136	f__norank_c__Gitt-GS-136	g__norank_c__Gitt-GS-136	s__uncultured_bacterium_g__norank_c__Gitt-GS-136	OTU307	4	0	0	0	0	0	0	0	0	0	0	0	0	0	0	0	0	0	0
d__Bacteria	k__norank_d__Bacteria	p__Bacteroidetes	c__Bacteroidia	o__Bacteroidales	f__Muribaculaceae	g__norank_f__Muribaculaceae	s__uncultured_bacterium_g__norank_f__Muribaculaceae	OTU308	2	2	0	0	1	0	0	0	0	0	1	0	0	0	0	0	0	0	0
d__Bacteria	k__norank_d__Bacteria	p__Chloroflexi	c__unclassified_p__Chloroflexi	o__unclassified_p__Chloroflexi	f__unclassified_p__Chloroflexi	g__unclassified_p__Chloroflexi	s__unclassified_p__Chloroflexi	OTU309	2	0	0	0	0	0	0	0	0	0	0	0	0	0	0	0	0	0	0
d__Bacteria	k__norank_d__Bacteria	p__Firmicutes	c__Erysipelotrichia	o__Erysipelotrichales	f__Erysipelotrichaceae	g__norank_f__Erysipelotrichaceae	s__uncultured_Allobaculum_sp._g__norank	OTU31	0	0	0	0	0	0	0	1	0	0	0	0	0	0	0	0	0	0	0
d__Bacteria	k__norank_d__Bacteria	p__Proteobacteria	c__Alphaproteobacteria	o__Tistrellales	f__Geminicoccaceae	g__norank_f__Geminicoccaceae	s__uncultured_alpha_proteobacterium_g__norank_f__Geminicoccaceae	OTU310	2	0	0	0	0	0	0	0	0	0	0	0	0	0	0	0	0	0	0
d__Bacteria	k__norank_d__Bacteria	p__Firmicutes	c__Clostridia	o__Clostridiales	f__Lachnospiraceae	g__norank_f__Lachnospiraceae	s__unclassified_g__norank_f__Lachnospiraceae	OTU311	4	0	0	0	0	0	0	0	0	0	0	0	0	0	0	0	0	0	0
d__Bacteria	k__norank_d__Bacteria	p__Firmicutes	c__Clostridia	o__Clostridiales	f__Lachnospiraceae	g__A2	s__unclassified_g__A2	OTU312	18	0	0	0	0	0	0	0	0	0	0	0	0	0	0	0	0	0	0
d__Bacteria	k__norank_d__Bacteria	p__Firmicutes	c__Clostridia	o__Clostridiales	f__Lachnospiraceae	g__unclassified_f__Lachnospiraceae	s__unclassified_f__Lachnospiraceae	OTU313	12	0	0	0	0	0	0	0	0	0	0	0	0	0	0	0	0	0	0
d__Bacteria	k__norank_d__Bacteria	p__Firmicutes	c__Bacilli	o__Lactobacillales	f__Lactobacillaceae	g__Lactobacillus	s__unclassified_g__Lactobacillus	OTU314	3	0	0	0	0	0	0	0	0	0	0	0	0	0	0	0	0	0	0
d__Bacteria	k__norank_d__Bacteria	p__Tenericutes	c__Mollicutes	o__Mollicutes_RF39	f__norank_o__Mollicutes_RF39	g__norank_o__Mollicutes_RF39	s__unclassified_g__norank_o__Mollicutes_RF39	OTU315	2	0	0	0	0	0	0	0	0	0	0	0	0	0	0	0	0	0	0
d__Bacteria	k__norank_d__Bacteria	p__Proteobacteria	c__Deltaproteobacteria	o__Myxococcales	f__Nannocystaceae	g__unclassified_f__Nannocystaceae	s__unclassified_f__Nannocystaceae	OTU316	2	0	0	0	0	0	0	0	0	0	0	0	0	0	0	0	0	0	0
d__Bacteria	k__norank_d__Bacteria	p__Firmicutes	c__Clostridia	o__Clostridiales	f__Lachnospiraceae	g__Roseburia	s__Lachnospiraceae_bacterium_DW52	OTU317	24	0	0	0	0	0	0	0	0	0	0	0	0	0	0	0	0	0	0
d__Bacteria	k__norank_d__Bacteria	p__Bacteroidetes	c__Bacteroidia	o__Bacteroidales	f__Muribaculaceae	g__norank_f__Muribaculaceae	s__uncultured_Bacteroidales_bacterium_g__norank_f__Muribaculaceae	OTU318	10	0	0	0	1	0	0	0	0	0	0	0	0	0	0	0	0	0	0
d__Bacteria	k__norank_d__Bacteria	p__Firmicutes	c__Clostridia	o__Clostridiales	f__Lachnospiraceae	g__norank_f__Lachnospiraceae	s__uncultured_bacterium_g__norank_f__Lachnospiraceae	OTU319	2	0	0	0	0	0	0	0	0	0	0	0	0	0	0	0	0	0	0
d__Bacteria	k__norank_d__Bacteria	p__Bacteroidetes	c__Bacteroidia	o__Bacteroidales	f__Muribaculaceae	g__norank_f__Muribaculaceae	s__mouse_gut_metagenome_g__norank_f__Muribaculaceae	OTU32	0	0	0	0	0	0	0	1	0	0	0	0	0	0	0	0	0	1	0
d__Bacteria	k__norank_d__Bacteria	p__Firmicutes	c__Clostridia	o__Clostridiales	f__Lachnospiraceae	g__Lachnospiraceae_NK4A136_group	s__unclassified_g__Lachnospiraceae_NK4A136_group	OTU320	112	2	2	7	0	2	1	0	3	4	13	5	0	1	1	2	0	0	0
d__Bacteria	k__norank_d__Bacteria	p__Firmicutes	c__Clostridia	o__Clostridiales	f__Lachnospiraceae	g__Marvinbryantia	s__uncultured_bacterium_g__Marvinbryantia	OTU321	22	0	0	0	0	0	0	0	0	0	0	0	0	0	0	0	0	0	0
d__Bacteria	k__norank_d__Bacteria	p__Firmicutes	c__Clostridia	o__Clostridiales	f__Ruminococcaceae	g__Fastidiosipila	s__unclassified_g__Fastidiosipila	OTU322	17	0	0	0	0	0	0	0	0	0	0	0	0	0	0	0	0	0	0
d__Bacteria	k__norank_d__Bacteria	p__Firmicutes	c__Clostridia	o__Clostridiales	f__Lachnospiraceae	g__Lachnospiraceae_NK4A136_group	s__uncultured_bacterium_g__Lachnospiraceae_NK4A136_group	OTU323	13	1	0	0	0	0	0	1	0	0	0	1	0	0	0	0	2	0	0
d__Bacteria	k__norank_d__Bacteria	p__Bacteroidetes	c__Bacteroidia	o__Bacteroidales	f__Muribaculaceae	g__norank_f__Muribaculaceae	s__uncultured_bacterium_g__norank_f__Muribaculaceae	OTU324	5	0	0	0	0	0	0	0	0	0	0	0	0	0	0	0	0	0	0
d__Bacteria	k__norank_d__Bacteria	p__Acidobacteria	c__Subgroup_6	o__norank_c__Subgroup_6	f__norank_c__Subgroup_6	g__norank_c__Subgroup_6	s__uncultured_Acidobacteriaceae_bacterium_g__norank_c__Subgroup_6	OTU325	5	0	0	0	0	0	0	0	0	0	0	0	0	0	0	0	0	0	0
d__Bacteria	k__norank_d__Bacteria	p__Bacteroidetes	c__Bacteroidia	o__Bacteroidales	f__unclassified_o__Bacteroidales	g__unclassified_o__Bacteroidales	s__unclassified_o__Bacteroidales	OTU326	3	0	0	0	0	0	0	0	0	0	0	0	0	0	0	0	0	0	0
d__Bacteria	k__norank_d__Bacteria	p__Firmicutes	c__Clostridia	o__Clostridiales	f__Lachnospiraceae	g__unclassified_f__Lachnospiraceae	s__unclassified_f__Lachnospiraceae	OTU327	44	0	0	1	0	0	1	1	0	0	1	6	0	1	0	1	2	0	0
d__Bacteria	k__norank_d__Bacteria	p__Proteobacteria	c__Deltaproteobacteria	o__NB1-j	f__norank_o__NB1-j	g__norank_o__NB1-j	s__unclassified_g__norank_o__NB1-j	OTU328	1	0	0	0	0	0	0	0	0	0	0	0	0	0	0	0	0	0	0
d__Bacteria	k__norank_d__Bacteria	p__Rokubacteria	c__NC10	o__Rokubacteriales	f__norank_o__Rokubacteriales	g__norank_o__Rokubacteriales	s__uncultured_bacterium_g__norank_o__Rokubacteriales	OTU329	1	0	0	0	0	0	0	0	0	0	0	0	0	0	0	0	0	0	0
d__Bacteria	k__norank_d__Bacteria	p__Proteobacteria	c__Gammaproteobacteria	o__Betaproteobacteriales	f__Burkholderiaceae	g__Curvibacter	s__uncultured_beta_proteobacterium_g__Curvibacter	OTU33	12	27	20	21	18	15	19	14	17	13	74	36	0	0	0	0	0	0	0
d__Bacteria	k__norank_d__Bacteria	p__Firmicutes	c__Clostridia	o__Clostridiales	f__Lachnospiraceae	g__Lachnoanaerobaculum	s__unclassified_g__Lachnoanaerobaculum	OTU330	2	0	0	0	0	0	0	0	0	0	0	0	0	0	0	0	0	0	0
d__Bacteria	k__norank_d__Bacteria	p__Firmicutes	c__Clostridia	o__Clostridiales	f__Lachnospiraceae	g__GCA-900066575	s__uncultured_bacterium_g__GCA-900066575	OTU331	9	0	0	0	0	0	0	0	0	0	2	0	0	0	0	0	0	0	0
d__Bacteria	k__norank_d__Bacteria	p__Firmicutes	c__Clostridia	o__Clostridiales	f__Lachnospiraceae	g__unclassified_f__Lachnospiraceae	s__unclassified_f__Lachnospiraceae	OTU332	2	0	0	0	0	0	0	0	0	0	0	0	0	0	0	0	0	0	0
d__Bacteria	k__norank_d__Bacteria	p__Firmicutes	c__Clostridia	o__Clostridiales	f__unclassified_o__Clostridiales	g__unclassified_o__Clostridiales	s__unclassified_o__Clostridiales	OTU333	4	0	0	0	0	0	0	0	0	0	0	0	0	0	0	0	0	0	0
d__Bacteria	k__norank_d__Bacteria	p__Chloroflexi	c__Gitt-GS-136	o__norank_c__Gitt-GS-136	f__norank_c__Gitt-GS-136	g__norank_c__Gitt-GS-136	s__uncultured_Chloroflexus_sp._g__norank_c__Gitt-GS-136	OTU334	3	0	0	0	0	0	0	0	0	0	0	0	0	0	0	0	0	0	0
d__Bacteria	k__norank_d__Bacteria	p__Bacteroidetes	c__Bacteroidia	o__Bacteroidales	f__Muribaculaceae	g__norank_f__Muribaculaceae	s__uncultured_bacterium_g__norank_f__Muribaculaceae	OTU335	5	0	0	0	2	0	0	0	0	0	0	0	0	0	0	0	0	0	0
d__Bacteria	k__norank_d__Bacteria	p__Actinobacteria	c__Actinobacteria	o__Bifidobacteriales	f__Bifidobacteriaceae	g__Bifidobacterium	s__Bifidobacterium_longum_subsp._longum	OTU336	3	0	0	0	0	2	0	0	0	0	0	0	0	0	0	0	0	0	0
d__Bacteria	k__norank_d__Bacteria	p__Acidobacteria	c__Subgroup_6	o__norank_c__Subgroup_6	f__norank_c__Subgroup_6	g__norank_c__Subgroup_6	s__unclassified_g__norank_c__Subgroup_6	OTU337	5	0	0	0	0	0	0	0	0	0	0	0	0	0	0	0	0	0	0
d__Bacteria	k__norank_d__Bacteria	p__Proteobacteria	c__Gammaproteobacteria	o__Pasteurellales	f__Pasteurellaceae	g__Aggregatibacter	s__unclassified_g__Aggregatibacter	OTU338	2	0	0	0	0	0	0	0	0	0	0	1	0	0	0	0	0	0	0
d__Bacteria	k__norank_d__Bacteria	p__Proteobacteria	c__Alphaproteobacteria	o__Rhizobiales	f__Beijerinckiaceae	g__Methylobacterium	s__Methylobacterium_aquaticum	OTU339	1	0	0	0	0	1	0	0	2	0	2	1	0	0	0	0	1	0	0
d__Bacteria	k__norank_d__Bacteria	p__Actinobacteria	c__Actinobacteria	o__Micrococcales	f__Microbacteriaceae	g__Microbacterium	s__Microbacterium_ginsengisoli	OTU34	16	9	4	2	23	19	12	7	11	2	18	34	0	0	0	0	1	0	0
d__Bacteria	k__norank_d__Bacteria	p__Chloroflexi	c__Anaerolineae	o__Anaerolineales	f__Anaerolineaceae	g__UTCFX1	s__uncultured_bacterium_g__UTCFX1	OTU341	2	1	0	0	0	0	0	0	0	0	0	0	0	0	0	0	0	0	0
d__Bacteria	k__norank_d__Bacteria	p__Firmicutes	c__Clostridia	o__Clostridiales	f__Lachnospiraceae	g__Lachnospiraceae_NK4A136_group	s__uncultured_bacterium_g__Lachnospiraceae_NK4A136_group	OTU342	1	0	0	0	0	0	0	0	0	0	0	0	0	0	0	0	0	0	0
d__Bacteria	k__norank_d__Bacteria	p__Firmicutes	c__Bacilli	o__Lactobacillales	f__Carnobacteriaceae	g__Jeotgalibaca	s__uncultured_bacterium_g__Jeotgalibaca	OTU343	2	0	0	0	0	1	0	0	0	0	3	0	0	0	0	0	0	0	0
d__Bacteria	k__norank_d__Bacteria	p__unclassified_k__norank_d__Bacteria	c__unclassified_k__norank_d__Bacteria	o__unclassified_k__norank_d__Bacteria	f__unclassified_k__norank_d__Bacteria	g__unclassified_k__norank_d__Bacteria	s__unclassified_k__norank_d__Bacteria	OTU344	3	0	0	0	0	0	0	0	0	0	0	0	0	0	0	0	0	0	0
d__Bacteria	k__norank_d__Bacteria	p__Chloroflexi	c__TK10	o__norank_c__TK10	f__norank_c__TK10	g__norank_c__TK10	s__unclassified_g__norank_c__TK10	OTU345	6	2	0	0	0	0	0	0	0	0	0	4	0	0	0	0	0	0	0
d__Bacteria	k__norank_d__Bacteria	p__Proteobacteria	c__Alphaproteobacteria	o__Rhizobiales	f__Beijerinckiaceae	g__Microvirga	s__uncultured_Balneimonas_sp.	OTU346	5	0	0	0	0	0	0	0	0	0	0	0	0	0	0	0	0	0	0
d__Bacteria	k__norank_d__Bacteria	p__Acidobacteria	c__Thermoanaerobaculia	o__Thermoanaerobaculales	f__Thermoanaerobaculaceae	g__Subgroup_10	s__uncultured_bacterium_g__Subgroup_10	OTU347	2	0	0	0	0	0	0	0	0	0	0	0	0	0	0	0	0	0	0
d__Bacteria	k__norank_d__Bacteria	p__Firmicutes	c__Bacilli	o__Bacillales	f__Bacillaceae	g__Bacillus	s__Bacillus_decolorationis	OTU348	1	0	0	0	0	0	0	0	0	0	0	0	0	0	0	0	0	0	0
d__Bacteria	k__norank_d__Bacteria	p__Firmicutes	c__Bacilli	o__Bacillales	f__Bacillaceae	g__Pseudogracilibacillus	s__uncultured_bacterium_g__Pseudogracilibacillus	OTU349	1	0	0	0	0	0	0	0	0	0	0	0	0	0	0	0	0	0	0
d__Bacteria	k__norank_d__Bacteria	p__Chloroflexi	c__Anaerolineae	o__Anaerolineales	f__Anaerolineaceae	g__Anaerolinea	s__unclassified_g__Anaerolinea	OTU35	0	0	0	0	0	0	0	3	0	0	0	0	0	0	0	0	0	0	0
d__Bacteria	k__norank_d__Bacteria	p__Firmicutes	c__Clostridia	o__Clostridiales	f__Lachnospiraceae	g__norank_f__Lachnospiraceae	s__uncultured_bacterium_g__norank_f__Lachnospiraceae	OTU350	9	0	0	0	0	0	0	0	0	0	0	0	0	0	0	0	0	0	0
d__Bacteria	k__norank_d__Bacteria	p__Firmicutes	c__Clostridia	o__Clostridiales	f__Lachnospiraceae	g__Roseburia	s__uncultured_bacterium_g__Roseburia	OTU351	3	0	0	0	0	0	0	0	0	0	0	0	0	0	0	0	0	0	0
d__Bacteria	k__norank_d__Bacteria	p__Proteobacteria	c__Gammaproteobacteria	o__Cardiobacteriales	f__Wohlfahrtiimonadaceae	g__Ignatzschineria	s__swine_effluent_bacterium_CHNDP41	OTU352	3	0	0	0	0	0	0	0	0	0	0	3	0	0	0	0	0	0	0
d__Bacteria	k__norank_d__Bacteria	p__Firmicutes	c__Clostridia	o__Clostridiales	f__Family_XI_o__Clostridiales	g__Gallicola	s__uncultured_bacterium_g__Gallicola	OTU353	9	0	0	0	0	0	0	0	0	0	0	0	0	0	0	0	0	0	0
d__Bacteria	k__norank_d__Bacteria	p__Firmicutes	c__Bacilli	o__Bacillales	f__Bacillaceae	g__Bacillus	s__unclassified_g__Bacillus	OTU354	2	0	0	0	0	0	0	0	0	0	0	0	0	0	0	0	0	0	0
d__Bacteria	k__norank_d__Bacteria	p__unclassified_k__norank_d__Bacteria	c__unclassified_k__norank_d__Bacteria	o__unclassified_k__norank_d__Bacteria	f__unclassified_k__norank_d__Bacteria	g__unclassified_k__norank_d__Bacteria	s__unclassified_k__norank_d__Bacteria	OTU355	2	0	0	0	0	0	0	0	0	0	0	0	0	0	0	0	0	0	0
d__Bacteria	k__norank_d__Bacteria	p__Proteobacteria	c__Gammaproteobacteria	o__Steroidobacterales	f__Steroidobacteraceae	g__Steroidobacter	s__unclassified_g__Steroidobacter	OTU356	3	0	0	0	0	0	0	0	0	0	0	0	0	0	0	0	0	0	0
d__Bacteria	k__norank_d__Bacteria	p__Firmicutes	c__Clostridia	o__Clostridiales	f__Peptococcaceae	g__Desulfosporosinus	s__unclassified_g__Desulfosporosinus	OTU357	2	0	0	0	0	0	0	0	0	0	0	0	0	0	0	0	0	0	0
d__Bacteria	k__norank_d__Bacteria	p__Firmicutes	c__Bacilli	o__Lactobacillales	f__Carnobacteriaceae	g__Atopostipes	s__unclassified_g__Atopostipes	OTU358	2	0	0	0	0	0	0	0	0	0	0	0	0	0	0	0	0	0	0
d__Bacteria	k__norank_d__Bacteria	p__Firmicutes	c__Clostridia	o__Clostridiales	f__Ruminococcaceae	g__unclassified_f__Ruminococcaceae	s__unclassified_f__Ruminococcaceae	OTU359	2	0	0	0	0	0	0	0	0	0	0	0	0	0	0	0	0	0	0
d__Bacteria	k__norank_d__Bacteria	p__Bacteroidetes	c__Bacteroidia	o__Sphingobacteriales	f__Sphingobacteriaceae	g__unclassified_f__Sphingobacteriaceae	s__unclassified_f__Sphingobacteriaceae	OTU36	0	0	0	0	0	0	0	0	0	0	3	0	0	0	0	0	0	0	0
d__Bacteria	k__norank_d__Bacteria	p__Firmicutes	c__Bacilli	o__Bacillales	f__Paenibacillaceae	g__Brevibacillus	s__unclassified_g__Brevibacillus	OTU360	2	0	0	0	0	0	0	0	0	0	0	0	0	0	0	0	0	0	0
d__Bacteria	k__norank_d__Bacteria	p__Actinobacteria	c__Actinobacteria	o__Corynebacteriales	f__Corynebacteriaceae	g__Corynebacterium_1	s__Corynebacterium_minutissimum	OTU361	15	1	0	15	5	1	0	15	1	1	13	4	0	0	0	0	0	0	1
d__Bacteria	k__norank_d__Bacteria	p__Actinobacteria	c__Actinobacteria	o__Streptosporangiales	f__Streptosporangiaceae	g__Streptosporangium	s__unclassified_g__Streptosporangium	OTU362	2	0	0	0	0	0	0	0	0	0	0	0	0	0	0	0	0	0	0
d__Bacteria	k__norank_d__Bacteria	p__Actinobacteria	c__Actinobacteria	o__unclassified_c__Actinobacteria	f__unclassified_c__Actinobacteria	g__unclassified_c__Actinobacteria	s__unclassified_c__Actinobacteria	OTU363	1	0	0	0	0	0	0	0	0	0	0	0	0	0	0	0	0	0	0
d__Bacteria	k__norank_d__Bacteria	p__Chloroflexi	c__Anaerolineae	o__Anaerolineales	f__Anaerolineaceae	g__Anaerolinea	s__uncultured_bacterium_g__Anaerolinea	OTU364	2	0	0	0	0	0	0	0	0	0	0	0	0	0	0	0	0	0	0
d__Bacteria	k__norank_d__Bacteria	p__Proteobacteria	c__Alphaproteobacteria	o__Rhizobiales	f__Rhizobiales_Incertae_Sedis	g__Phreatobacter	s__unclassified_g__Phreatobacter	OTU365	0	8	0	0	0	0	2	1	0	0	2	0	0	0	0	0	0	0	0
d__Bacteria	k__norank_d__Bacteria	p__Firmicutes	c__Clostridia	o__Clostridiales	f__Ruminococcaceae	g__Ruminiclostridium_5	s__unclassified_g__Ruminiclostridium_5	OTU366	1	0	0	0	0	0	0	0	0	0	0	0	0	0	0	0	0	0	0
d__Bacteria	k__norank_d__Bacteria	p__Acidobacteria	c__Subgroup_22	o__norank_c__Subgroup_22	f__norank_c__Subgroup_22	g__norank_c__Subgroup_22	s__uncultured_Acidobacteria_bacterium_g__norank_c__Subgroup_22	OTU367	2	0	0	0	0	0	0	0	0	0	0	0	0	0	0	0	0	0	0
d__Bacteria	k__norank_d__Bacteria	p__Firmicutes	c__Clostridia	o__Clostridiales	f__Family_XVIII	g__norank_f__Family_XVIII	s__unclassified_g__norank_f__Family_XVIII	OTU368	2	0	0	0	0	0	0	0	0	0	0	0	0	0	0	0	0	0	0
d__Bacteria	k__norank_d__Bacteria	p__Chloroflexi	c__Chloroflexia	o__Chloroflexales	f__Roseiflexaceae	g__norank_f__Roseiflexaceae	s__uncultured_bacterium_g__norank_f__Roseiflexaceae	OTU369	3	0	0	0	0	0	0	0	0	0	0	0	0	0	0	0	0	0	0
d__Bacteria	k__norank_d__Bacteria	p__Bacteroidetes	c__Bacteroidia	o__Bacteroidales	f__Muribaculaceae	g__norank_f__Muribaculaceae	s__uncultured_bacterium_g__norank_f__Muribaculaceae	OTU37	157	0	0	2	0	0	0	0	2	0	21	1	0	0	0	0	0	0	1
d__Bacteria	k__norank_d__Bacteria	p__Bacteroidetes	c__Bacteroidia	o__unclassified_c__Bacteroidia	f__unclassified_c__Bacteroidia	g__unclassified_c__Bacteroidia	s__unclassified_c__Bacteroidia	OTU370	2	0	0	0	0	0	0	0	0	0	0	0	0	0	0	0	0	0	0
d__Bacteria	k__norank_d__Bacteria	p__Gemmatimonadetes	c__Gemmatimonadetes	o__norank_c__Gemmatimonadetes	f__norank_c__Gemmatimonadetes	g__norank_c__Gemmatimonadetes	s__unclassified_g__norank_c__Gemmatimonadetes	OTU371	4	0	0	0	0	0	0	0	0	0	0	0	0	0	0	0	0	0	0
d__Bacteria	k__norank_d__Bacteria	p__Firmicutes	c__Clostridia	o__Clostridiales	f__Ruminococcaceae	g__unclassified_f__Ruminococcaceae	s__unclassified_f__Ruminococcaceae	OTU372	3	0	0	0	0	0	0	0	0	0	0	0	0	0	0	0	0	0	0
d__Bacteria	k__norank_d__Bacteria	p__Proteobacteria	c__Gammaproteobacteria	o__Methylococcales	f__Methylococcaceae	g__Methylocaldum	s__unclassified_g__Methylocaldum	OTU373	0	0	0	0	0	0	0	0	0	1	0	0	0	0	0	0	0	0	0
d__Bacteria	k__norank_d__Bacteria	p__unclassified_k__norank_d__Bacteria	c__unclassified_k__norank_d__Bacteria	o__unclassified_k__norank_d__Bacteria	f__unclassified_k__norank_d__Bacteria	g__unclassified_k__norank_d__Bacteria	s__unclassified_k__norank_d__Bacteria	OTU374	3	0	0	0	0	0	0	0	0	0	0	0	0	0	0	0	0	0	0
d__Bacteria	k__norank_d__Bacteria	p__Actinobacteria	c__Actinobacteria	o__unclassified_c__Actinobacteria	f__unclassified_c__Actinobacteria	g__unclassified_c__Actinobacteria	s__unclassified_c__Actinobacteria	OTU375	2	0	0	0	0	0	0	0	0	0	0	0	0	0	0	0	0	0	0
d__Bacteria	k__norank_d__Bacteria	p__Firmicutes	c__Clostridia	o__Clostridiales	f__Ruminococcaceae	g__unclassified_f__Ruminococcaceae	s__unclassified_f__Ruminococcaceae	OTU376	11	0	1	0	1	2	0	0	0	0	1	1	0	0	0	1	0	0	0
d__Bacteria	k__norank_d__Bacteria	p__Bacteroidetes	c__Bacteroidia	o__Bacteroidales	f__Dysgonomonadaceae	g__Proteiniphilum	s__uncultured_Bacteroidetes_bacterium_g__Proteiniphilum	OTU377	3	0	0	0	0	0	0	0	0	0	0	0	0	0	0	0	0	0	0
d__Bacteria	k__norank_d__Bacteria	p__Actinobacteria	c__Actinobacteria	o__norank_c__Actinobacteria	f__norank_c__Actinobacteria	g__norank_c__Actinobacteria	s__uncultured_bacterium_g__norank_c__Actinobacteria	OTU379	1	0	0	0	0	0	0	0	0	0	0	0	0	0	0	0	0	0	0
d__Bacteria	k__norank_d__Bacteria	p__Proteobacteria	c__Gammaproteobacteria	o__Betaproteobacteriales	f__Burkholderiaceae	g__Ralstonia	s__uncultured_bacterium_g__Ralstonia	OTU38	55	292	168	206	240	226	188	265	420	145	883	231	0	0	0	1	2	0	1
d__Bacteria	k__norank_d__Bacteria	p__Firmicutes	c__Clostridia	o__Clostridiales	f__Lachnospiraceae	g__norank_f__Lachnospiraceae	s__uncultured_bacterium_g__norank_f__Lachnospiraceae	OTU380	6	0	0	0	0	0	0	0	0	0	0	0	0	0	0	1	0	0	0
d__Bacteria	k__norank_d__Bacteria	p__Firmicutes	c__Clostridia	o__Clostridiales	f__Family_XI_o__Clostridiales	g__Peptoniphilus	s__Peptoniphilus_stercorisuis	OTU381	10	0	0	0	0	0	0	0	0	0	0	0	0	0	0	0	0	0	0
d__Bacteria	k__norank_d__Bacteria	p__unclassified_k__norank_d__Bacteria	c__unclassified_k__norank_d__Bacteria	o__unclassified_k__norank_d__Bacteria	f__unclassified_k__norank_d__Bacteria	g__unclassified_k__norank_d__Bacteria	s__unclassified_k__norank_d__Bacteria	OTU382	2	0	0	0	0	0	0	0	0	0	0	0	0	0	0	0	0	0	0
d__Bacteria	k__norank_d__Bacteria	p__Firmicutes	c__Clostridia	o__Clostridiales	f__Ruminococcaceae	g__Ruminiclostridium_9	s__unclassified_g__Ruminiclostridium_9	OTU383	6	0	0	0	0	0	1	0	0	0	0	0	0	1	0	0	0	0	0
d__Bacteria	k__norank_d__Bacteria	p__unclassified_k__norank_d__Bacteria	c__unclassified_k__norank_d__Bacteria	o__unclassified_k__norank_d__Bacteria	f__unclassified_k__norank_d__Bacteria	g__unclassified_k__norank_d__Bacteria	s__unclassified_k__norank_d__Bacteria	OTU384	2	0	0	0	0	0	0	0	0	0	0	0	0	0	0	0	0	0	0
d__Bacteria	k__norank_d__Bacteria	p__Chloroflexi	c__Anaerolineae	o__SBR1031	f__norank_o__SBR1031	g__norank_o__SBR1031	s__unclassified_g__norank_o__SBR1031	OTU385	2	0	0	0	0	0	0	0	0	0	0	0	0	0	0	0	0	0	0
d__Bacteria	k__norank_d__Bacteria	p__Acidobacteria	c__Subgroup_6	o__norank_c__Subgroup_6	f__norank_c__Subgroup_6	g__norank_c__Subgroup_6	s__unclassified_g__norank_c__Subgroup_6	OTU386	1	0	0	0	0	0	0	0	0	0	0	0	0	0	0	0	0	0	0
d__Bacteria	k__norank_d__Bacteria	p__Firmicutes	c__Clostridia	o__Clostridiales	f__Caldicoprobacteraceae	g__Caldicoprobacter	s__anaerobic_digester_metagenome_g__Caldicoprobacter	OTU387	63	0	0	3	0	0	0	0	0	0	0	3	0	0	0	0	0	0	0
d__Bacteria	k__norank_d__Bacteria	p__Actinobacteria	c__Actinobacteria	o__Corynebacteriales	f__Corynebacteriaceae	g__Corynebacterium_1	s__Corynebacterium_casei_LMG_S-19264	OTU388	3	0	0	0	0	0	0	0	0	0	0	0	0	0	0	0	0	0	0
d__Bacteria	k__norank_d__Bacteria	p__Acidobacteria	c__Subgroup_25	o__norank_c__Subgroup_25	f__norank_c__Subgroup_25	g__norank_c__Subgroup_25	s__uncultured_bacterium_g__norank_c__Subgroup_25	OTU389	3	0	0	0	0	0	0	0	0	0	0	0	0	0	0	0	0	0	0
d__Bacteria	k__norank_d__Bacteria	p__Firmicutes	c__Negativicutes	o__Selenomonadales	f__Veillonellaceae	g__Veillonella	s__unclassified_g__Veillonella	OTU39	1	0	0	0	0	0	0	0	0	0	1	2	0	0	0	0	0	0	1
d__Bacteria	k__norank_d__Bacteria	p__Firmicutes	c__Bacilli	o__Lactobacillales	f__Lactobacillaceae	g__Lactobacillus	s__unclassified_g__Lactobacillus	OTU390	3	0	0	0	0	0	0	0	0	0	0	0	0	0	0	0	0	0	0
d__Bacteria	k__norank_d__Bacteria	p__Firmicutes	c__Clostridia	o__Clostridiales	f__Family_XI_o__Clostridiales	g__norank_f__Family_XI	s__uncultured_prokaryote_g__norank_f__Family_XI	OTU391	2	0	0	0	0	0	0	0	0	0	0	0	0	0	0	0	0	0	0
d__Bacteria	k__norank_d__Bacteria	p__Planctomycetes	c__OM190	o__norank_c__OM190	f__norank_c__OM190	g__norank_c__OM190	s__unclassified_g__norank_c__OM190	OTU393	1	0	0	0	0	0	0	0	0	0	0	0	0	0	0	0	0	0	0
d__Bacteria	k__norank_d__Bacteria	p__Bacteroidetes	c__Bacteroidia	o__Bacteroidales	f__Prevotellaceae	g__unclassified_f__Prevotellaceae	s__unclassified_f__Prevotellaceae	OTU394	2	0	0	0	0	0	0	0	0	0	0	0	0	0	0	0	0	0	0
d__Bacteria	k__norank_d__Bacteria	p__Latescibacteria	c__Latescibacteria	o__Latescibacterales	f__Latescibacteraceae	g__norank_f__Latescibacteraceae	s__uncultured_bacterium_g__norank_f__Latescibacteraceae	OTU397	2	0	0	0	0	0	0	0	0	0	0	0	0	0	0	0	0	0	0
d__Bacteria	k__norank_d__Bacteria	p__Patescibacteria	c__WWE3	o__norank_c__WWE3	f__norank_c__WWE3	g__norank_c__WWE3	s__unclassified_g__norank_c__WWE3	OTU398	1	0	0	0	0	0	0	0	0	0	0	0	0	0	0	0	0	0	0
d__Bacteria	k__norank_d__Bacteria	p__Acidobacteria	c__Subgroup_6	o__norank_c__Subgroup_6	f__norank_c__Subgroup_6	g__norank_c__Subgroup_6	s__unclassified_g__norank_c__Subgroup_6	OTU399	5	1	0	0	0	0	0	0	0	0	0	0	0	0	0	0	0	0	0
d__Bacteria	k__norank_d__Bacteria	p__Actinobacteria	c__Actinobacteria	o__Actinomycetales	f__Actinomycetaceae	g__Actinomyces	s__Actinomyces_odontolyticus	OTU4	0	0	0	0	0	3	0	1	0	0	1	0	0	0	0	0	0	0	0
d__Bacteria	k__norank_d__Bacteria	p__unclassified_k__norank_d__Bacteria	c__unclassified_k__norank_d__Bacteria	o__unclassified_k__norank_d__Bacteria	f__unclassified_k__norank_d__Bacteria	g__unclassified_k__norank_d__Bacteria	s__unclassified_k__norank_d__Bacteria	OTU40	0	0	0	0	0	0	0	0	0	0	1	0	0	0	0	0	0	0	0
d__Bacteria	k__norank_d__Bacteria	p__Firmicutes	c__Clostridia	o__Clostridiales	f__Family_XI_o__Clostridiales	g__Tissierella	s__uncultured_bacterium_g__Tissierella	OTU400	4	0	0	0	0	0	0	0	0	0	0	0	0	0	0	0	0	0	0
d__Bacteria	k__norank_d__Bacteria	p__Proteobacteria	c__Alphaproteobacteria	o__Tistrellales	f__Geminicoccaceae	g__Candidatus_Alysiosphaera	s__uncultured_bacterium_g__Candidatus_Alysiosphaera	OTU401	1	0	0	0	0	0	0	0	0	0	0	0	0	0	0	0	0	0	0
d__Bacteria	k__norank_d__Bacteria	p__Bacteroidetes	c__Bacteroidia	o__Bacteroidales	f__Muribaculaceae	g__norank_f__Muribaculaceae	s__uncultured_Bacteroidales_bacterium_g__norank_f__Muribaculaceae	OTU402	67	0	1	1	0	3	1	1	1	1	7	4	0	2	1	4	0	0	0
d__Bacteria	k__norank_d__Bacteria	p__Firmicutes	c__Clostridia	o__Clostridiales	f__Lachnospiraceae	g__unclassified_f__Lachnospiraceae	s__unclassified_f__Lachnospiraceae	OTU403	2	0	0	0	0	0	0	0	0	0	0	0	0	0	0	0	0	0	0
d__Bacteria	k__norank_d__Bacteria	p__Proteobacteria	c__Alphaproteobacteria	o__Rhodospirillales	f__norank_o__Rhodospirillales	g__norank_o__Rhodospirillales	s__unclassified_g__norank_o__Rhodospirillales	OTU404	3	0	0	0	0	0	0	0	0	0	0	0	0	0	0	0	0	0	0
d__Bacteria	k__norank_d__Bacteria	p__Firmicutes	c__Clostridia	o__Clostridiales	f__Lachnospiraceae	g__Lachnospiraceae_NK4A136_group	s__unclassified_g__Lachnospiraceae_NK4A136_group	OTU406	2	0	0	0	0	0	0	0	0	0	0	0	0	0	0	0	0	0	0
d__Bacteria	k__norank_d__Bacteria	p__Actinobacteria	c__Actinobacteria	o__Gaiellales	f__Gaiellaceae	g__Gaiella	s__unclassified_g__Gaiella	OTU407	0	1	0	0	0	0	0	1	0	0	0	0	0	0	0	0	0	0	0
d__Bacteria	k__norank_d__Bacteria	p__Firmicutes	c__Clostridia	o__Clostridiales	f__Family_XI_o__Clostridiales	g__unclassified_f__Family_XI_o__Clostridiales	s__unclassified_f__Family_XI_o__Clostridiales	OTU408	10	0	0	0	0	0	0	0	0	0	0	7	0	0	0	0	0	0	0
d__Bacteria	k__norank_d__Bacteria	p__Bacteroidetes	c__Bacteroidia	o__Bacteroidales	f__Muribaculaceae	g__norank_f__Muribaculaceae	s__unclassified_g__norank_f__Muribaculaceae	OTU409	2	0	0	0	0	0	0	0	0	0	0	0	0	0	0	0	0	0	0
d__Bacteria	k__norank_d__Bacteria	p__Bacteroidetes	c__Bacteroidia	o__Flavobacteriales	f__Weeksellaceae	g__Chryseobacterium	s__unclassified_g__Chryseobacterium	OTU41	0	3	1	0	2	0	1	0	0	0	12	4	0	0	0	0	0	0	0
d__Bacteria	k__norank_d__Bacteria	p__Proteobacteria	c__Alphaproteobacteria	o__Sphingomonadales	f__Sphingomonadaceae	g__Altererythrobacter	s__metagenome_g__Altererythrobacter	OTU410	0	0	0	0	0	0	0	0	0	0	3	0	0	0	0	0	0	0	0
d__Bacteria	k__norank_d__Bacteria	p__Proteobacteria	c__Deltaproteobacteria	o__Syntrophobacterales	f__Syntrophobacteraceae	g__Syntrophobacter	s__uncultured_bacterium_g__Syntrophobacter	OTU411	1	0	0	0	0	0	0	0	0	0	0	0	0	0	0	0	0	0	0
d__Bacteria	k__norank_d__Bacteria	p__Proteobacteria	c__Alphaproteobacteria	o__unclassified_c__Alphaproteobacteria	f__unclassified_c__Alphaproteobacteria	g__unclassified_c__Alphaproteobacteria	s__unclassified_c__Alphaproteobacteria	OTU412	2	0	0	0	0	0	0	0	0	0	0	0	0	0	0	0	0	0	0
d__Bacteria	k__norank_d__Bacteria	p__Firmicutes	c__Clostridia	o__Clostridiales	f__Clostridiales_vadinBB60_group	g__norank_f__Clostridiales_vadinBB60_group	s__unclassified_g__norank_f__Clostridiales_vadinBB60_group	OTU413	5	0	0	0	0	0	0	0	0	0	1	0	0	0	0	1	0	0	0
d__Bacteria	k__norank_d__Bacteria	p__Chloroflexi	c__TK10	o__norank_c__TK10	f__norank_c__TK10	g__norank_c__TK10	s__unclassified_g__norank_c__TK10	OTU414	2	0	0	0	0	0	0	0	0	0	0	0	0	0	0	0	0	0	0
d__Bacteria	k__norank_d__Bacteria	p__Firmicutes	c__Clostridia	o__Clostridiales	f__Ruminococcaceae	g__norank_f__Ruminococcaceae	s__unclassified_g__norank_f__Ruminococcaceae	OTU415	33	0	0	0	0	0	0	2	0	0	0	1	0	0	1	2	0	0	0
d__Bacteria	k__norank_d__Bacteria	p__Firmicutes	c__Clostridia	o__Clostridiales	f__Clostridiales_vadinBB60_group	g__norank_f__Clostridiales_vadinBB60_group	s__unclassified_g__norank_f__Clostridiales_vadinBB60_group	OTU416	7	0	0	1	0	0	0	0	0	0	0	0	0	0	0	0	0	0	0
d__Bacteria	k__norank_d__Bacteria	p__Firmicutes	c__Clostridia	o__Clostridiales	f__Ruminococcaceae	g__Anaerotruncus	s__unclassified_g__Anaerotruncus	OTU417	3	0	0	0	0	0	0	0	0	0	0	0	1	0	0	0	0	0	0
d__Bacteria	k__norank_d__Bacteria	p__Bacteroidetes	c__Bacteroidia	o__Bacteroidales	f__Muribaculaceae	g__norank_f__Muribaculaceae	s__uncultured_bacterium_g__norank_f__Muribaculaceae	OTU418	12	0	0	0	0	0	0	0	0	0	0	0	0	0	0	0	0	0	0
d__Bacteria	k__norank_d__Bacteria	p__Acidobacteria	c__Subgroup_6	o__norank_c__Subgroup_6	f__norank_c__Subgroup_6	g__norank_c__Subgroup_6	s__uncultured_bacterium_DA008	OTU419	4	0	0	0	0	0	0	0	0	0	0	0	0	0	0	0	0	0	0
d__Bacteria	k__norank_d__Bacteria	p__Firmicutes	c__Bacilli	o__Bacillales	f__Paenibacillaceae	g__unclassified_f__Paenibacillaceae	s__unclassified_f__Paenibacillaceae	OTU42	0	0	0	0	0	0	0	0	0	0	1	0	0	0	0	0	0	0	0
d__Bacteria	k__norank_d__Bacteria	p__Actinobacteria	c__Actinobacteria	o__unclassified_c__Actinobacteria	f__unclassified_c__Actinobacteria	g__unclassified_c__Actinobacteria	s__unclassified_c__Actinobacteria	OTU420	1	0	0	0	0	0	0	0	0	0	0	0	0	0	0	0	0	0	0
d__Bacteria	k__norank_d__Bacteria	p__Chloroflexi	c__Chloroflexia	o__Thermomicrobiales	f__JG30-KF-CM45	g__norank_f__JG30-KF-CM45	s__unclassified_g__norank_f__JG30-KF-CM45	OTU421	6	0	0	0	0	0	0	0	0	0	0	0	0	0	0	0	0	0	0
d__Bacteria	k__norank_d__Bacteria	p__Proteobacteria	c__Deltaproteobacteria	o__Desulfovibrionales	f__Desulfovibrionaceae	g__norank_f__Desulfovibrionaceae	s__uncultured_Desulfovibrionaceae_bacterium_g__norank	OTU422	4	0	0	1	0	1	0	0	0	0	0	0	0	0	0	0	0	1	1
d__Bacteria	k__norank_d__Bacteria	p__Chloroflexi	c__KD4-96	o__norank_c__KD4-96	f__norank_c__KD4-96	g__norank_c__KD4-96	s__uncultured_Chloroflexi_bacterium_g__norank_c__KD4-96	OTU423	1	0	0	0	0	0	0	0	0	0	0	0	0	0	0	0	0	0	0
d__Bacteria	k__norank_d__Bacteria	p__Firmicutes	c__Clostridia	o__Clostridiales	f__Lachnospiraceae	g__norank_f__Lachnospiraceae	s__uncultured_bacterium_g__norank_f__Lachnospiraceae	OTU424	1	0	0	0	0	0	0	0	0	0	0	0	0	0	0	0	0	0	0
d__Bacteria	k__norank_d__Bacteria	p__Bacteroidetes	c__Bacteroidia	o__Bacteroidales	f__Bacteroidaceae	g__Bacteroides	s__uncultured_prokaryote_g__Bacteroides	OTU425	1	0	0	0	0	0	0	0	0	0	0	0	0	0	0	0	0	0	0
d__Bacteria	k__norank_d__Bacteria	p__Nitrospirae	c__Nitrospira	o__norank_c__Nitrospira	f__norank_c__Nitrospira	g__Nitrospira	s__Nitrospira_sp._enrichment_culture_clone_80	OTU426	1	0	0	0	0	0	0	0	0	0	0	0	0	0	0	0	0	0	0
d__Bacteria	k__norank_d__Bacteria	p__Chloroflexi	c__Gitt-GS-136	o__norank_c__Gitt-GS-136	f__norank_c__Gitt-GS-136	g__norank_c__Gitt-GS-136	s__uncultured_bacterium_g__norank_c__Gitt-GS-136	OTU427	7	0	0	0	0	0	0	0	0	0	0	0	0	0	0	0	0	0	0
d__Bacteria	k__norank_d__Bacteria	p__Planctomycetes	c__Planctomycetacia	o__Gemmatales	f__Gemmataceae	g__norank_f__Gemmataceae	s__unclassified_g__norank_f__Gemmataceae	OTU428	2	0	0	0	0	0	0	0	0	0	0	0	0	0	0	0	0	0	0
d__Bacteria	k__norank_d__Bacteria	p__Proteobacteria	c__Gammaproteobacteria	o__Betaproteobacteriales	f__Rhodocyclaceae	g__Azoarcus	s__uncultured_bacterium_g__Azoarcus	OTU429	1	0	0	0	0	0	0	0	0	0	0	0	0	0	0	0	0	0	0
d__Bacteria	k__norank_d__Bacteria	p__Proteobacteria	c__Deltaproteobacteria	o__Oligoflexales	f__Oligoflexaceae	g__Silvanigrella	s__unclassified_g__Silvanigrella	OTU43	0	0	0	0	0	0	0	0	0	0	1	0	0	0	0	0	0	0	0
d__Bacteria	k__norank_d__Bacteria	p__Proteobacteria	c__Gammaproteobacteria	o__Steroidobacterales	f__Steroidobacteraceae	g__norank_f__Steroidobacteraceae	s__unclassified_g__norank_f__Steroidobacteraceae	OTU430	1	0	0	0	0	0	0	0	0	0	0	0	0	0	0	0	0	0	0
d__Bacteria	k__norank_d__Bacteria	p__Acidobacteria	c__Subgroup_6	o__norank_c__Subgroup_6	f__norank_c__Subgroup_6	g__norank_c__Subgroup_6	s__unclassified_g__norank_c__Subgroup_6	OTU431	1	0	0	0	0	0	0	0	0	0	0	0	0	0	0	0	0	0	0
d__Bacteria	k__norank_d__Bacteria	p__Firmicutes	c__Clostridia	o__Clostridiales	f__Family_XI_o__Clostridiales	g__unclassified_f__Family_XI_o__Clostridiales	s__unclassified_f__Family_XI_o__Clostridiales	OTU432	2	0	0	0	0	0	0	0	0	0	0	0	0	0	0	0	0	0	0
d__Bacteria	k__norank_d__Bacteria	p__Bacteroidetes	c__Bacteroidia	o__Bacteroidales	f__Rikenellaceae	g__Rikenellaceae_RC9_gut_group	s__unclassified_g__Rikenellaceae_RC9_gut_group	OTU433	1	0	0	0	0	0	0	0	0	0	0	0	0	0	0	0	0	0	0
d__Bacteria	k__norank_d__Bacteria	p__Actinobacteria	c__Actinobacteria	o__Propionibacteriales	f__Nocardioidaceae	g__Nocardioides	s__unclassified_g__Nocardioides	OTU434	2	1	0	0	0	0	0	0	0	0	0	0	0	0	0	0	0	0	0
d__Bacteria	k__norank_d__Bacteria	p__Acidobacteria	c__Acidobacteriia	o__Acidobacteriales	f__unclassified_o__Acidobacteriales	g__unclassified_o__Acidobacteriales	s__unclassified_o__Acidobacteriales	OTU435	3	0	0	0	0	0	0	0	0	0	0	0	0	0	0	0	0	0	0
d__Bacteria	k__norank_d__Bacteria	p__Firmicutes	c__Clostridia	o__Clostridiales	f__Lachnospiraceae	g__norank_f__Lachnospiraceae	s__unclassified_g__norank_f__Lachnospiraceae	OTU436	8	0	0	0	0	0	0	0	0	0	0	1	0	0	0	0	0	0	0
d__Bacteria	k__norank_d__Bacteria	p__Firmicutes	c__Clostridia	o__Clostridiales	f__Lachnospiraceae	g__ASF356	s__uncultured_bacterium_g__ASF356	OTU437	11	1	0	0	0	0	0	0	0	0	0	1	0	0	0	0	0	0	0
d__Bacteria	k__norank_d__Bacteria	p__Acidobacteria	c__Subgroup_25	o__norank_c__Subgroup_25	f__norank_c__Subgroup_25	g__norank_c__Subgroup_25	s__uncultured_bacterium_g__norank_c__Subgroup_25	OTU438	1	0	0	0	0	0	0	0	0	0	0	0	0	0	0	0	0	0	0
d__Bacteria	k__norank_d__Bacteria	p__Planctomycetes	c__OM190	o__norank_c__OM190	f__norank_c__OM190	g__norank_c__OM190	s__uncultured_bacterium_g__norank_c__OM190	OTU439	2	0	0	0	0	0	0	0	0	0	0	0	0	0	0	0	0	0	0
d__Bacteria	k__norank_d__Bacteria	p__Proteobacteria	c__Gammaproteobacteria	o__Betaproteobacteriales	f__Hydrogenophilaceae	g__Hydrogenophilus	s__uncultured_bacterium_g__Hydrogenophilus	OTU44	0	0	0	0	0	0	0	0	0	0	2	0	0	0	0	0	0	0	0
d__Bacteria	k__norank_d__Bacteria	p__Bacteroidetes	c__Bacteroidia	o__Bacteroidales	f__Muribaculaceae	g__norank_f__Muribaculaceae	s__uncultured_bacterium_g__norank_f__Muribaculaceae	OTU440	2	0	0	0	0	0	0	0	0	0	0	0	0	0	0	0	0	0	0
d__Bacteria	k__norank_d__Bacteria	p__Firmicutes	c__Clostridia	o__Clostridiales	f__Peptostreptococcaceae	g__Peptostreptococcus	s__unclassified_g__Peptostreptococcus	OTU441	4	0	0	0	0	0	0	0	0	0	0	0	0	0	0	0	0	0	0
d__Bacteria	k__norank_d__Bacteria	p__Actinobacteria	c__Actinobacteria	o__Corynebacteriales	f__Nocardiaceae	g__Gordonia	s__unclassified_g__Gordonia	OTU442	1	0	0	0	0	0	0	0	0	0	0	0	0	0	0	0	0	0	0
d__Bacteria	k__norank_d__Bacteria	p__Bacteroidetes	c__Bacteroidia	o__Bacteroidales	f__Muribaculaceae	g__norank_f__Muribaculaceae	s__uncultured_bacterium_g__norank_f__Muribaculaceae	OTU443	2	0	0	0	0	0	0	0	0	0	0	0	0	0	0	0	0	0	0
d__Bacteria	k__norank_d__Bacteria	p__Firmicutes	c__Bacilli	o__Bacillales	f__Staphylococcaceae	g__Staphylococcus	s__unclassified_g__Staphylococcus	OTU444	1	0	0	3	1	3	3	4	3	0	22	6	0	1	0	0	0	2	0
d__Bacteria	k__norank_d__Bacteria	p__Firmicutes	c__Bacilli	o__Bacillales	f__Planococcaceae	g__Kurthia	s__uncultured_bacterium_g__Kurthia	OTU445	2	0	0	0	3	0	1	0	0	0	0	13	0	0	0	0	1	0	0
d__Bacteria	k__norank_d__Bacteria	p__Bacteroidetes	c__Bacteroidia	o__Bacteroidales	f__Tannerellaceae	g__Parabacteroides	s__uncultured_bacterium_g__Parabacteroides	OTU446	1	1	0	0	0	0	0	0	0	0	0	0	0	0	0	0	0	0	0
d__Bacteria	k__norank_d__Bacteria	p__Firmicutes	c__Bacilli	o__Lactobacillales	f__Lactobacillaceae	g__Lactobacillus	s__Lactobacillus_fermentum	OTU447	6	0	0	0	2	0	0	0	0	0	0	10	0	0	0	0	0	0	0
d__Bacteria	k__norank_d__Bacteria	p__Firmicutes	c__Bacilli	o__Lactobacillales	f__Lactobacillaceae	g__Lactobacillus	s__Lactobacillus_brevis	OTU448	2	0	0	2	0	0	0	0	0	0	2	0	0	0	0	0	0	0	0
d__Bacteria	k__norank_d__Bacteria	p__Firmicutes	c__Clostridia	o__Clostridiales	f__Clostridiales_vadinBB60_group	g__norank_f__Clostridiales_vadinBB60_group	s__unclassified_g__norank_f__Clostridiales_vadinBB60_group	OTU449	7	0	0	0	0	0	0	0	0	0	0	0	0	0	0	0	0	0	0
d__Bacteria	k__norank_d__Bacteria	p__Proteobacteria	c__Gammaproteobacteria	o__Pseudomonadales	f__Moraxellaceae	g__Enhydrobacter	s__Moraxella_osloensis_g__Enhydrobacter	OTU45	0	0	1	1	0	0	0	0	0	3	3	0	0	0	0	0	0	0	0
d__Bacteria	k__norank_d__Bacteria	p__Actinobacteria	c__Actinobacteria	o__Micrococcales	f__Microbacteriaceae	g__unclassified_f__Microbacteriaceae	s__unclassified_f__Microbacteriaceae	OTU450	6	0	0	0	0	1	0	0	0	0	3	1	0	0	0	0	0	0	0
d__Bacteria	k__norank_d__Bacteria	p__Bacteroidetes	c__Bacteroidia	o__Bacteroidales	f__Muribaculaceae	g__norank_f__Muribaculaceae	s__uncultured_bacterium_g__norank_f__Muribaculaceae	OTU451	17	0	0	0	0	0	0	0	0	0	0	0	0	0	0	0	0	0	0
d__Bacteria	k__norank_d__Bacteria	p__unclassified_k__norank_d__Bacteria	c__unclassified_k__norank_d__Bacteria	o__unclassified_k__norank_d__Bacteria	f__unclassified_k__norank_d__Bacteria	g__unclassified_k__norank_d__Bacteria	s__unclassified_k__norank_d__Bacteria	OTU452	6	0	0	0	0	0	0	0	0	0	0	0	0	0	0	0	0	0	0
d__Bacteria	k__norank_d__Bacteria	p__Entotheonellaeota	c__Entotheonellia	o__Entotheonellales	f__Entotheonellaceae	g__norank_f__Entotheonellaceae	s__unclassified_g__norank_f__Entotheonellaceae	OTU453	1	0	0	0	0	0	0	0	0	0	0	0	0	0	0	0	0	0	0
d__Bacteria	k__norank_d__Bacteria	p__Verrucomicrobia	c__Verrucomicrobiae	o__Chthoniobacterales	f__Chthoniobacteraceae	g__Chthoniobacter	s__uncultured_bacterium_g__Chthoniobacter	OTU454	2	0	0	0	0	0	0	0	0	0	0	0	0	0	0	0	0	0	0
d__Bacteria	k__norank_d__Bacteria	p__Firmicutes	c__Clostridia	o__Clostridiales	f__Lachnospiraceae	g__norank_f__Lachnospiraceae	s__unclassified_g__norank_f__Lachnospiraceae	OTU455	54	0	0	0	0	0	0	0	0	0	2	0	0	0	0	0	0	0	0
d__Bacteria	k__norank_d__Bacteria	p__unclassified_k__norank_d__Bacteria	c__unclassified_k__norank_d__Bacteria	o__unclassified_k__norank_d__Bacteria	f__unclassified_k__norank_d__Bacteria	g__unclassified_k__norank_d__Bacteria	s__unclassified_k__norank_d__Bacteria	OTU456	6	0	0	0	0	0	0	0	0	0	0	0	0	0	0	0	0	0	0
d__Bacteria	k__norank_d__Bacteria	p__Firmicutes	c__Clostridia	o__Clostridiales	f__Ruminococcaceae	g__Ruminiclostridium	s__unclassified_g__Ruminiclostridium	OTU457	3	0	0	0	0	0	0	0	0	0	0	0	0	0	0	0	0	0	0
d__Bacteria	k__norank_d__Bacteria	p__Firmicutes	c__Clostridia	o__Clostridiales	f__Ruminococcaceae	g__Ruminiclostridium	s__unclassified_g__Ruminiclostridium	OTU458	1	0	0	0	0	0	0	0	0	0	0	0	0	0	0	0	0	0	0
d__Bacteria	k__norank_d__Bacteria	p__Planctomycetes	c__Planctomycetacia	o__Gemmatales	f__Gemmataceae	g__norank_f__Gemmataceae	s__unclassified_g__norank_f__Gemmataceae	OTU459	1	0	0	0	0	0	0	0	0	0	0	0	0	0	0	0	0	0	0
d__Bacteria	k__norank_d__Bacteria	p__Bacteroidetes	c__Bacteroidia	o__Flavobacteriales	f__Flavobacteriaceae	g__Flavobacterium	s__unclassified_g__Flavobacterium	OTU46	0	0	0	0	0	0	0	0	0	0	3	0	0	0	0	0	0	0	0
d__Bacteria	k__norank_d__Bacteria	p__unclassified_k__norank_d__Bacteria	c__unclassified_k__norank_d__Bacteria	o__unclassified_k__norank_d__Bacteria	f__unclassified_k__norank_d__Bacteria	g__unclassified_k__norank_d__Bacteria	s__unclassified_k__norank_d__Bacteria	OTU460	3	0	0	0	0	0	0	0	0	0	0	0	0	0	0	0	0	0	0
d__Bacteria	k__norank_d__Bacteria	p__Bacteroidetes	c__Bacteroidia	o__Bacteroidales	f__Muribaculaceae	g__norank_f__Muribaculaceae	s__uncultured_bacterium_g__norank_f__Muribaculaceae	OTU461	24	0	0	0	0	0	0	0	0	0	0	3	0	0	0	0	0	0	0
d__Bacteria	k__norank_d__Bacteria	p__Firmicutes	c__Clostridia	o__Clostridiales	f__Clostridiales_vadinBB60_group	g__norank_f__Clostridiales_vadinBB60_group	s__uncultured_bacterium_g__norank_f__Clostridiales_vadinBB60_group	OTU462	1	0	0	0	0	0	0	0	0	0	0	0	0	1	0	0	0	1	0
d__Bacteria	k__norank_d__Bacteria	p__Actinobacteria	c__Actinobacteria	o__Micromonosporales	f__Micromonosporaceae	g__Micromonospora	s__Micromonospora_coxensis	OTU463	3	0	0	0	0	0	0	0	0	0	0	0	0	0	0	0	0	0	0
d__Bacteria	k__norank_d__Bacteria	p__Firmicutes	c__Clostridia	o__Clostridiales	f__Lachnospiraceae	g__norank_f__Lachnospiraceae	s__Clostridium_sp._Culture-54	OTU464	3	0	0	0	0	0	0	0	0	0	0	0	0	0	0	0	0	0	0
d__Bacteria	k__norank_d__Bacteria	p__Chloroflexi	c__Dehalococcoidia	o__S085	f__norank_o__S085	g__norank_o__S085	s__uncultured_bacterium_g__norank_o__S085	OTU466	1	0	0	0	0	0	0	0	0	0	0	0	0	0	0	0	0	0	0
d__Bacteria	k__norank_d__Bacteria	p__Firmicutes	c__Bacilli	o__Bacillales	f__Bacillaceae	g__Anoxybacillus	s__Anoxybacillus_flavithermus_subsp._flavithermus	OTU467	4	0	0	0	0	0	0	4	1	0	28	5	0	0	0	0	0	0	0
d__Bacteria	k__norank_d__Bacteria	p__Bacteroidetes	c__Bacteroidia	o__Bacteroidales	f__Muribaculaceae	g__norank_f__Muribaculaceae	s__uncultured_bacterium_g__norank_f__Muribaculaceae	OTU468	4	0	0	0	0	0	0	0	0	0	1	0	0	0	0	0	0	0	0
d__Bacteria	k__norank_d__Bacteria	p__Proteobacteria	c__Gammaproteobacteria	o__Betaproteobacteriales	f__Rhodocyclaceae	g__Thauera	s__unclassified_g__Thauera	OTU469	1	114	0	2	0	0	0	0	0	0	0	0	0	0	0	0	0	0	0
d__Bacteria	k__norank_d__Bacteria	p__Firmicutes	c__Bacilli	o__Bacillales	f__Thermoactinomycetaceae	g__Planifilum	s__uncultured_bacterium_g__Planifilum	OTU47	0	0	0	0	0	0	0	0	0	0	6	0	0	0	0	0	0	0	0
d__Bacteria	k__norank_d__Bacteria	p__Bacteroidetes	c__Bacteroidia	o__Bacteroidales	f__Prevotellaceae	g__Prevotella_6	s__Bacteroidales_bacterium_KA00344	OTU470	2	0	0	0	0	0	0	0	0	0	0	0	0	0	0	0	0	0	0
d__Bacteria	k__norank_d__Bacteria	p__Bacteroidetes	c__Bacteroidia	o__Bacteroidales	f__Marinifilaceae	g__Butyricimonas	s__uncultured_bacterium_g__Butyricimonas	OTU471	1	0	0	0	0	0	1	0	0	0	0	0	0	0	0	0	0	0	0
d__Bacteria	k__norank_d__Bacteria	p__Firmicutes	c__Clostridia	o__Clostridiales	f__Lachnospiraceae	g__norank_f__Lachnospiraceae	s__unclassified_g__norank_f__Lachnospiraceae	OTU472	28	0	0	0	0	0	0	0	0	0	0	0	0	0	0	0	0	0	0
d__Bacteria	k__norank_d__Bacteria	p__Actinobacteria	c__Actinobacteria	o__Microtrichales	f__Microtrichaceae	g__Candidatus_Microthrix	s__metagenome_g__Candidatus_Microthrix	OTU473	5	0	0	0	0	0	0	0	0	0	0	0	0	0	0	0	0	0	0
d__Bacteria	k__norank_d__Bacteria	p__Firmicutes	c__Clostridia	o__Clostridiales	f__unclassified_o__Clostridiales	g__unclassified_o__Clostridiales	s__unclassified_o__Clostridiales	OTU474	1	0	0	0	0	0	0	0	0	0	0	0	0	0	0	0	0	0	0
d__Bacteria	k__norank_d__Bacteria	p__Firmicutes	c__Clostridia	o__Clostridiales	f__Lachnospiraceae	g__Lachnospiraceae_NK4A136_group	s__uncultured_bacterium_g__Lachnospiraceae_NK4A136_group	OTU475	25	1	0	2	0	2	1	0	1	0	3	1	0	1	0	0	0	0	0
d__Bacteria	k__norank_d__Bacteria	p__unclassified_k__norank_d__Bacteria	c__unclassified_k__norank_d__Bacteria	o__unclassified_k__norank_d__Bacteria	f__unclassified_k__norank_d__Bacteria	g__unclassified_k__norank_d__Bacteria	s__unclassified_k__norank_d__Bacteria	OTU476	3	0	0	0	0	0	0	0	0	0	0	0	0	0	0	0	0	0	0
d__Bacteria	k__norank_d__Bacteria	p__Firmicutes	c__Clostridia	o__Clostridiales	f__Ruminococcaceae	g__Butyricicoccus	s__uncultured_organism_g__Butyricicoccus	OTU477	2	0	0	0	0	0	0	0	0	0	0	0	11	0	5	2	1	6	3
d__Bacteria	k__norank_d__Bacteria	p__Actinobacteria	c__Actinobacteria	o__Frankiales	f__Geodermatophilaceae	g__Blastococcus	s__unclassified_g__Blastococcus	OTU478	5	0	0	0	0	0	1	0	0	0	0	0	0	0	0	0	0	0	0
d__Bacteria	k__norank_d__Bacteria	p__Proteobacteria	c__Deltaproteobacteria	o__Desulfovibrionales	f__Desulfovibrionaceae	g__norank_f__Desulfovibrionaceae	s__uncultured_bacterium_g__norank_f__Desulfovibrionaceae	OTU479	3	2	0	0	0	0	0	0	0	0	0	17	0	1	0	0	1	0	0
d__Bacteria	k__norank_d__Bacteria	p__Firmicutes	c__Clostridia	o__Clostridiales	f__Lachnospiraceae	g__Lachnospiraceae_NK4A136_group	s__unclassified_g__Lachnospiraceae_NK4A136_group	OTU48	0	0	0	0	0	0	0	0	0	2	1	0	0	0	0	0	0	0	0
d__Bacteria	k__norank_d__Bacteria	p__Firmicutes	c__Bacilli	o__Lactobacillales	f__Enterococcaceae	g__Enterococcus	s__Enterococcus_mundtii	OTU480	19	0	1	7	0	0	0	1	0	1	4	29	1	0	0	0	0	0	0
d__Bacteria	k__norank_d__Bacteria	p__Chloroflexi	c__Chloroflexia	o__Chloroflexales	f__Roseiflexaceae	g__norank_f__Roseiflexaceae	s__unclassified_g__norank_f__Roseiflexaceae	OTU481	2	0	0	0	0	0	0	0	0	0	0	0	0	0	0	0	0	0	0
d__Bacteria	k__norank_d__Bacteria	p__Proteobacteria	c__Gammaproteobacteria	o__Enterobacteriales	f__Enterobacteriaceae	g__Escherichia-Shigella	s__Escherichia_coli_g__Escherichia-Shigella	OTU482	15	21	2	20	9	4	6	3	6	13	26	53	143	8	2	0	9	2	1
d__Bacteria	k__norank_d__Bacteria	p__Proteobacteria	c__Gammaproteobacteria	o__Betaproteobacteriales	f__Burkholderiaceae	g__Variovorax	s__unclassified_g__Variovorax	OTU483	2	4	0	0	0	0	0	0	0	0	1	4	0	0	0	0	0	0	0
d__Bacteria	k__norank_d__Bacteria	p__Proteobacteria	c__Gammaproteobacteria	o__Betaproteobacteriales	f__Burkholderiaceae	g__Pusillimonas	s__uncultured_bacterium_g__Pusillimonas	OTU484	2	0	0	0	0	0	0	0	0	0	0	0	0	0	0	0	0	0	0
d__Bacteria	k__norank_d__Bacteria	p__Chloroflexi	c__Anaerolineae	o__SBR1031	f__norank_o__SBR1031	g__norank_o__SBR1031	s__unclassified_g__norank_o__SBR1031	OTU485	1	0	0	0	0	0	0	0	0	0	0	0	0	0	0	0	0	0	0
d__Bacteria	k__norank_d__Bacteria	p__unclassified_k__norank_d__Bacteria	c__unclassified_k__norank_d__Bacteria	o__unclassified_k__norank_d__Bacteria	f__unclassified_k__norank_d__Bacteria	g__unclassified_k__norank_d__Bacteria	s__unclassified_k__norank_d__Bacteria	OTU486	2	0	0	0	0	0	0	0	0	0	0	0	0	0	0	0	0	0	0
d__Bacteria	k__norank_d__Bacteria	p__Proteobacteria	c__Gammaproteobacteria	o__Pasteurellales	f__Pasteurellaceae	g__Haemophilus	s__Haemophilus_parainfluenzae_T3T1	OTU487	7	0	0	0	0	0	0	1	0	0	0	1	0	0	0	0	0	0	0
d__Bacteria	k__norank_d__Bacteria	p__Firmicutes	c__Clostridia	o__Clostridiales	f__Lachnospiraceae	g__Lachnospiraceae_UCG-001	s__unclassified_g__Lachnospiraceae_UCG-001	OTU488	3	1	0	0	0	0	0	0	0	0	0	0	0	0	0	0	0	0	0
d__Bacteria	k__norank_d__Bacteria	p__Firmicutes	c__Clostridia	o__Clostridiales	f__Lachnospiraceae	g__unclassified_f__Lachnospiraceae	s__unclassified_f__Lachnospiraceae	OTU489	2	0	0	0	0	0	0	0	0	0	0	0	0	0	0	0	0	0	0
d__Bacteria	k__norank_d__Bacteria	p__Proteobacteria	c__Deltaproteobacteria	o__Myxococcales	f__Haliangiaceae	g__Haliangium	s__uncultured_sludge_bacterium_A9	OTU49	0	0	0	0	0	0	0	0	0	0	2	0	0	0	0	0	0	0	0
d__Bacteria	k__norank_d__Bacteria	p__Firmicutes	c__Clostridia	o__Clostridiales	f__Lachnospiraceae	g__Blautia	s__unclassified_g__Blautia	OTU490	3	0	0	0	0	1	0	0	0	0	2	24	0	2	1	0	0	0	0
d__Bacteria	k__norank_d__Bacteria	p__Firmicutes	c__Clostridia	o__Clostridiales	f__Ruminococcaceae	g__unclassified_f__Ruminococcaceae	s__unclassified_f__Ruminococcaceae	OTU491	1	0	0	0	0	0	0	0	0	0	0	0	0	0	0	0	0	0	0
d__Bacteria	k__norank_d__Bacteria	p__Bacteroidetes	c__Bacteroidia	o__Bacteroidales	f__Muribaculaceae	g__norank_f__Muribaculaceae	s__uncultured_Bacteroidales_bacterium_g__norank_f__Muribaculaceae	OTU492	56	1	0	3	0	0	0	0	0	0	1	9	0	0	0	0	0	0	0
d__Bacteria	k__norank_d__Bacteria	p__Proteobacteria	c__Gammaproteobacteria	o__Betaproteobacteriales	f__Burkholderiaceae	g__unclassified_f__Burkholderiaceae	s__unclassified_f__Burkholderiaceae	OTU493	1	0	0	0	0	0	0	0	0	0	0	0	0	0	0	0	0	0	0
d__Bacteria	k__norank_d__Bacteria	p__Bacteroidetes	c__Bacteroidia	o__Bacteroidales	f__Muribaculaceae	g__norank_f__Muribaculaceae	s__uncultured_bacterium_g__norank_f__Muribaculaceae	OTU494	49	0	0	9	0	1	0	0	0	0	0	10	0	0	0	0	0	0	0
d__Bacteria	k__norank_d__Bacteria	p__Firmicutes	c__Clostridia	o__Clostridiales	f__Lachnospiraceae	g__unclassified_f__Lachnospiraceae	s__unclassified_f__Lachnospiraceae	OTU495	5	0	0	0	0	0	0	0	0	0	0	0	0	0	0	0	0	0	0
d__Bacteria	k__norank_d__Bacteria	p__Armatimonadetes	c__DG-56	o__norank_c__DG-56	f__norank_c__DG-56	g__norank_c__DG-56	s__uncultured_bacterium_g__norank_c__DG-56	OTU496	2	0	0	0	0	0	0	0	0	0	0	0	0	0	0	0	0	0	0
d__Bacteria	k__norank_d__Bacteria	p__Firmicutes	c__Clostridia	o__Clostridiales	f__Lachnospiraceae	g__Blautia	s__Blautia_coccoides_g__Blautia	OTU497	3	0	0	0	0	0	0	0	0	0	0	0	0	0	0	0	0	0	0
d__Bacteria	k__norank_d__Bacteria	p__Bacteroidetes	c__Bacteroidia	o__Bacteroidales	f__Muribaculaceae	g__norank_f__Muribaculaceae	s__uncultured_Bacteroidales_bacterium_g__norank_f__Muribaculaceae	OTU498	8	0	0	0	0	0	0	0	0	0	2	0	0	0	0	0	0	0	0
d__Bacteria	k__norank_d__Bacteria	p__Chloroflexi	c__JG30-KF-CM66	o__norank_c__JG30-KF-CM66	f__norank_c__JG30-KF-CM66	g__norank_c__JG30-KF-CM66	s__unclassified_g__norank_c__JG30-KF-CM66	OTU499	3	0	0	0	0	0	0	0	0	0	0	0	0	0	0	0	0	0	0
[truncated: 546 more rows]

## Sheet: Table S9
Table S9 Read proportions of bacterial 16S rRNA genes among Wolbachia-infected females and Wolbachia-free females at the genus level by Mann-Whitney U tests.
[truncated: 690 more rows]

## Sheet: Table S13
Table S13 Read proportions of bacterial 16S rRNA genes for Wolbachia-infected females (excluding Wolbachia reads) at the genus level by Mann-Whitney U tests.
[truncated: 440 more rows]

[truncated: 4 more sheets: Table S14, Table S15, Table S16, Table S17]
